# Supplementary material for: RNA Pol II–dependent transcription efficiency fine-tunes A-to-I editing levels
Source: Genome Res. 2024 Feb;34(2):231–42. doi: 10.1101/gr.277686.123 (PMC10984384; doi:10.1101/gr.277686.123)
Supplement: Supplement 2 [file Supplemental_Table_S1.xlsx]

## Sheet: Main
id	chr	pos	str	ann	gene_name	ENS_id	RNA_total_0min_Average-Ed-Level	RNA_total_10min_Average-Ed-Level	RNA_total_20min_Average-Ed-Level	RNA_total_30min_Average-Ed-Level	RNA_total_1h_Average-Ed-Level	RNA_total_1_5h_Average-Ed-Level	RNA_total_2h_Average-Ed-Level	RNA_total_4h_Average-Ed-Level	RNA_total_8h_Average-Ed-Level	RNA_total_12h_Average-Ed-Level	RNA_total_16h_Average-Ed-Level	RNA_labeled_0min_Average-Ed-Level	RNA_labeled_10min_Average-Ed-Level	RNA_labeled_20min_Average-Ed-Level	RNA_labeled_30min_Average-Ed-Level	RNA_labeled_1h_Average-Ed-Level	RNA_labeled_1_5h_Average-Ed-Level	RNA_labeled_2h_Average-Ed-Level	RNA_labeled_4h_Average-Ed-Level	RNA_labeled_8h_Average-Ed-Level	RNA_labeled_12h_Average-Ed-Level	RNA_labeled_16h_Average-Ed-Level	p-value-lab-tot	Average_total	Average_labeled
chr10:11016172	chr10	11016172	+	UTR	Fbxo30	ENSMUSG00000047648	0.0644911	0.0700855	0.0436508	0.071182	0.0789341	0.0873828	0.067433	0.0882421	0.0454545	0.040404	0.113642	0.102222	0.187821	0.179496	0.259935	0.196269	0.21922	0.291392	0.288795	0.175233	0.232434	0.22093	1.05373e-07	0.0700819	0.213977
chr10:127742238	chr10	127742238	+	Intron	Pan2	ENSMUSG00000005682	0.0198876	0.037659	0.025096	0.0338907	0.022439	0.02638	0.0285021	0.0302734	0.0268471	0.031169	0.0252664	0.0078942	0.0113382	0.012412	0.0138921	0.00972194	0.0161336	0.0110232	0.0147704	0.0143525	0.0120589	0.0156586	2.24837e-08	0.0279464	0.0126596
chr10:57886405	chr10	57886405	+	UTR	Lims1	ENSMUSG00000019920	0.10644	0.142606	0.191694	0.112347	0.129952	0.11981	0.0376939	0.0958623	0.104991	0.0890097	0.104264	0.133333	0.0833333	0.222222	0.108333	0.0793651	0.174747	0.138889	0.153555	0.214815	0.0512821	0.0416667	0.491744	0.112243	0.127413
chr10:7463584	chr10	7463584	+	Intron	Gm20470,Katna1	ENSMUSG00000092190,ENSMUSG00000019794	0.68254	0.683333	0.952381	0.726984	0.809259	0.688889	0.533333	0.722222	0.9	0.696429	0.875	0.190476	0.162037	0.233333	0.125	0.422222	0.1	0.285714	0.244444	0.121693	0.257576	0.555556	1.36316e-08	0.751852	0.245277
chr10:7532794	chr10	7532794	+	Intron	Gm15560,Ppil4	ENSMUSG00000081497,ENSMUSG00000015757	0.5	0.396296	0.625	0.324242	0.592857	0.222222	0.305952	0.412879	0.466667	0.569444	0.579365	0.233333	0.354396	0.472222	0.474074	0.305556	0.161905	0.648148	0.458333	0.401587	0.311905	0.310745	0.184232	0.454084	0.375655
chr10:79743763	chr10	79743763	+	Intron	Dazap1,Gm15122,Mir6911	ENSMUSG00000069565,ENSMUSG00000087672,ENSMUSG00000098672	0.976008	0.973286	0.983676	0.975436	0.975894	0.966891	0.959798	0.972313	0.968467	0.964619	0.976128	0.516544	0.768421	0.781252	0.730919	0.822548	0.797508	0.841414	0.727443	0.799777	0.80148	0.752942	1.0356e-07	0.972047	0.758204
chr10:81127962	chr10	81127962	+	UTR	Gm10778	ENSMUSG00000096856	0.572222	0.84127	0.804233	0.862963	0.430556	0.692641	0.701299	0.683333	0.6875	0.708547	0.319444	0.449735	0.600122	0.75848	0.801587	0.869281	0.610008	0.781313	0.724817	0.661667	0.612698	0.735472	0.661436	0.664001	0.69138
chr10:81128022	chr10	81128022	+	UTR	Gm10778	ENSMUSG00000096856	0.833333	0.611111	0.462963	0.555556	0.25	0.666667	0.0555556	0.111111	0.75	0.541667	0.3	0.287879	0.703704	0.869048	0.683333	0.640873	0.691919	0.702991	0.768921	0.733333	0.655345	0.542929	0.041393	0.467088	0.661843
chr10:81287091	chr10	81287091	+	UTR	Gm4767	ENSMUSG00000094076	0.709804	0.84127	0.804233	0.866667	0.460317	0.785714	0.796537	0.683333	0.6875	0.7338	0.349206	0.449735	0.600122	0.774074	0.801587	0.913725	0.610008	0.831313	0.738492	0.687371	0.68661	0.775	0.82831	0.701671	0.715276
chr10:86299039	chr10	86299039	+	UTR	AC152453.1,Gm16268,Nt5dc3,Stab2	ENSMUSG00000112743,ENSMUSG00000089959,ENSMUSG00000054027,ENSMUSG00000035459	0.0105694	0.00978513	0.0144746	0.0111538	0.011952	0.00565639	0.0108391	0.00951992	0.0112384	0.0133949	0.00899446	0.00960539	0.0103727	0.00876645	0.0129398	0.0177816	0.0136717	0.0175657	0.0147948	0.0141385	0.0161787	0.0179001	0.0137883	0.0106889	0.0139741
chr10:86299040	chr10	86299040	+	UTR	AC152453.1,Gm16268,Nt5dc3,Stab2	ENSMUSG00000112743,ENSMUSG00000089959,ENSMUSG00000054027,ENSMUSG00000035459	0.00833345	0.0148292	0.0187158	0.00804585	0.00652204	0.0148868	0.0118852	0.00670296	0.00816509	0.00926785	0.0108621	0.0104002	0.0156121	0.012465	0.0175738	0.0208708	0.0135003	0.0204665	0.0106738	0.0162424	0.0199098	0.0209693	0.00421535	0.0107469	0.016244
chr10:86299045	chr10	86299045	+	UTR	AC152453.1,Gm16268,Nt5dc3,Stab2	ENSMUSG00000112743,ENSMUSG00000089959,ENSMUSG00000054027,ENSMUSG00000035459	0.00933944	0.0127319	0.00554392	0.00984038	0.00897313	0.00949891	0.00951801	0.00809493	0.00647001	0.00956559	0.00605364	0.00449448	0.0106823	0.00752243	0.00991162	0.00946213	0.00727215	0.00870719	0.00864409	0.00744453	0.00650189	0.00897489	0.50883	0.00869363	0.00814706
chr10:86299065	chr10	86299065	+	UTR	AC152453.1,Gm16268,Nt5dc3,Stab2	ENSMUSG00000112743,ENSMUSG00000089959,ENSMUSG00000054027,ENSMUSG00000035459	0.0175571	0.0157271	0.0136697	0.0165907	0.0195057	0.0162343	0.0183547	0.018514	0.00716993	0.0180253	0.0155749	0.0151648	0.0215239	0.0186036	0.0209319	0.0218611	0.0205957	0.0218532	0.0207319	0.0210689	0.0178582	0.0233462	0.00257985	0.016084	0.0203217
chr10:86299084	chr10	86299084	+	UTR	AC152453.1,Gm16268,Nt5dc3,Stab2	ENSMUSG00000112743,ENSMUSG00000089959,ENSMUSG00000054027,ENSMUSG00000035459	0.030531	0.0210195	0.0220544	0.0286568	0.0211927	0.0254681	0.0341372	0.0213294	0.0166529	0.0238966	0.0223215	0.0298068	0.0343572	0.0348092	0.0306665	0.0323384	0.0332145	0.0398183	0.0340183	0.0324557	0.0286597	0.0269285	0.000260005	0.0242964	0.0324612
chr10:86299089	chr10	86299089	+	UTR	AC152453.1,Gm16268,Nt5dc3,Stab2	ENSMUSG00000112743,ENSMUSG00000089959,ENSMUSG00000054027,ENSMUSG00000035459	0.0275805	0.0176109	0.0209322	0.0293497	0.0196101	0.0179442	0.0334714	0.0218135	0.0158866	0.0239084	0.022212	0.0177422	0.0262336	0.022834	0.0172333	0.0212276	0.0183583	0.0214281	0.0224337	0.0190537	0.0203853	0.0170509	0.209003	0.0227563	0.0203619
chr10:86299099	chr10	86299099	+	UTR	AC152453.1,Gm16268,Nt5dc3,Stab2	ENSMUSG00000112743,ENSMUSG00000089959,ENSMUSG00000054027,ENSMUSG00000035459	0.00215054	0.00595214	0.00681657	0.00393969	0.00132275	0.00240999	0.00274178	0.00129199	0.0071026	0.00490296	0.00383711	0.00264068	0.00341112	0.00426095	0.00446559	0.0028839	0.00623143	0.00486787	0.00470568	0.00402588	0.0040874	0.00402945	0.687214	0.00386074	0.00414636
chr10:86299103	chr10	86299103	+	UTR	AC152453.1,Gm16268,Nt5dc3,Stab2	ENSMUSG00000112743,ENSMUSG00000089959,ENSMUSG00000054027,ENSMUSG00000035459	0.047212	0.0363582	0.0516237	0.0615682	0.056999	0.0500087	0.0508588	0.0469436	0.0366658	0.0465244	0.0549992	0.0321632	0.0445794	0.0500627	0.0436549	0.0468431	0.0508773	0.0542738	0.0523048	0.0473716	0.049934	0.0484133	0.556905	0.0490693	0.0473162
chr10:86299113	chr10	86299113	+	UTR	AC152453.1,Gm16268,Nt5dc3,Stab2	ENSMUSG00000112743,ENSMUSG00000089959,ENSMUSG00000054027,ENSMUSG00000035459	0.0588048	0.0531768	0.0535711	0.0678257	0.0538383	0.064938	0.0351157	0.0370808	0.0285247	0.054757	0.049754	0.0331043	0.0459303	0.0421658	0.049834	0.0514688	0.0580292	0.0505659	0.0599337	0.0512443	0.045656	0.0548747	0.764313	0.0506715	0.0493461
chr11:106018359	chr11	106018359	+	UTR	Gm10840,Limd2,Map3k3	ENSMUSG00000075480,ENSMUSG00000040699,ENSMUSG00000020700	0.742521	0.796056	0.665825	0.559259	0.732353	0.741434	0.78471	0.735354	0.857505	0.787197	0.835191	0.32381	0.693311	0.514286	0.722222	0.759722	0.422222	0.628788	0.676224	0.517249	0.68043	0.480201	0.00297796	0.748855	0.583497
chr11:113561969	chr11	113561969	+	Intron	Cpsf4l	ENSMUSG00000018727	0.0186162	0.0165055	0.0273486	0.015625	0.00804078	0.020949	0.0166067	0.0214872	0.0256819	0.00314465	0.028704	0.0125319	0.0215124	0.0148269	0.0198841	0.0188876	0.0216701	0.0185617	0.0177388	0.0207133	0.015954	0.0232767	0.920102	0.0184281	0.018687
chr11:113561986	chr11	113561986	+	Intron	Cpsf4l	ENSMUSG00000018727	0.0251045	0.0113004	0.0200194	0.0170148	0.0103071	0.0271883	0.0239332	0.0102909	0.0378151	0.00574713	0.021151	0.0111978	0.0212791	0.0210455	0.0294376	0.0205608	0.0239087	0.0223917	0.0242833	0.0241346	0.0214437	0.0283581	0.286619	0.0190793	0.0225492
chr11:54499732	chr11	54499732	+	Intron	Rapgef6	ENSMUSG00000037533	0.00932447	0.0237229	0.0304657	0.0862014	0.032527	0.0221024	0.0234857	0.0172782	0.00446429	0.0294771	0.017895	0.0278218	0.00986935	0.0263352	0.0107831	0.0162353	0.0179605	0.00840837	0.0115088	0.0145755	0.0110623	0.00800345	0.0869208	0.0269949	0.0147785
chr11:66878140	chr11	66878140	+	UTR	Sco1	ENSMUSG00000069844	0.00597715	0.00564167	0.00419391	0.00790974	0.00839329	0.0033379	0.00393782	0.00817755	0.00871939	0.00823458	0.00315352	0.00177928	0.0143578	0.00794046	0.00692122	0.00525275	0.0060937	0.00826253	0.00655905	0.0041629	0.00912134	0.00792979	0.414912	0.00615241	0.00712553
chr11:66878151	chr11	66878151	+	UTR	Sco1	ENSMUSG00000069844	0.013446	0.0110729	0.0161455	0.0155452	0.0119309	0.02415	0.015694	0.00847577	0.020131	0.0158722	0.0219051	0.00586649	0.0188984	0.0139063	0.0147189	0.0155115	0.00922676	0.0133878	0.0113767	0.00946453	0.011398	0.0173195	0.11385	0.0158517	0.012825
chr11:66878169	chr11	66878169	+	UTR	Sco1	ENSMUSG00000069844	0.00629952	0.00491183	0.00299924	0.00811925	0.00366146	0.00552685	0.00681081	0.00616336	0.00277008	0.00846251	0.00678443	0.00758409	0.00446527	0.00429774	0.00884842	0.00493625	0.00638744	0.00347079	0.00635835	0.00445043	0.00677918	0.0047107	0.979318	0.00568267	0.00566261
chr11:72493091	chr11	72493091	+	Exon	-,Ube2g1	none,ENSMUSG00000020794	0.15	0.244444	0.261111	0.214286	0.291667	0.238095	0.166667	0.0833333	0.25	0.361111	0.320635	0.0846561	0.0997151	0.103662	0.116758	0.0612745	0.0541126	0.0277778	0.0800926	0.080719	0.0538095	0.0512821	3.23391e-06	0.234668	0.0739872
chr11:77245241	chr11	77245241	+	Exon	Ssh2	ENSMUSG00000037926	0.0161018	0.0192478	0.0229174	0.0199507	0.0204692	0.0465196	0.0233341	0.0141684	0.0196353	0.00738557	0.028899	0.0151858	0.0154955	0.0148943	0.0194135	0.0218512	0.0212615	0.0185608	0.0196126	0.0160788	0.0262185	0.0205365	0.406227	0.0216935	0.0190099
chr11:78107262	chr11	78107262	+	Exon	2610507B11Rik,BC030499,Gm3948	ENSMUSG00000010277,ENSMUSG00000037593,ENSMUSG00000087295	0.11538	0.167453	0.110841	0.145934	0.116182	0.154393	0.142247	0.164812	0.153289	0.100957	0.114179	0.0589763	0.159236	0.122229	0.111416	0.129614	0.115131	0.105178	0.0945515	0.120285	0.138416	0.120855	0.0855495	0.135061	0.11599
chr11:82776068	chr11	82776068	+	UTR	Slfn5,Slfn5os	ENSMUSG00000054404,ENSMUSG00000086327	0.0227273	0.0498457	0.0563492	0.025	0.018018	0.0483131	0.0327273	0.0242063	0.0535714	0.0809387	0.0422705	0.0204511	0.0106967	0.0352849	0.0236534	0.0174266	0.0241288	0.00904413	0.0183811	0.0132794	0.0198518	0.0150703	0.00154642	0.0412698	0.0188426
chr11:82776086	chr11	82776086	+	UTR	Slfn5,Slfn5os	ENSMUSG00000054404,ENSMUSG00000086327	0.00812256	0.00798638	0.00540517	0.00950798	0.00864348	0.00344441	0.00240178	0.00700608	0.00884649	0.00655379	0.00626639	0.00452339	0.00705991	0.00736942	0.0113813	0.00718336	0.00588381	0.00951788	0.00520243	0.0082795	0.00698782	0.00605506	0.601474	0.00674405	0.00722217
chr11:82776090	chr11	82776090	+	UTR	Slfn5,Slfn5os	ENSMUSG00000054404,ENSMUSG00000086327	0.00400006	0.00598422	0.00647986	0.00408559	0.00601344	0.00787403	0.00427344	0.00632949	0.00372934	0.00496573	0.00373945	0.00574087	0.00569634	0.00694868	0.00676081	0.00552055	0.00587352	0.00699335	0.00853403	0.00576645	0.00644194	0.00565249	0.0347693	0.00522497	0.00635718
chr11:82776097	chr11	82776097	+	UTR	Slfn5,Slfn5os	ENSMUSG00000054404,ENSMUSG00000086327	0.00492617	0.00720553	0.0111082	0.00949258	0.00780749	0.00657023	0.00871687	0.00985426	0.0136971	0.0093695	0.00606147	0.00538605	0.010312	0.0108326	0.0117425	0.0086307	0.0101329	0.00985736	0.00898815	0.0111862	0.00913501	0.0122118	0.202107	0.00861903	0.00985593
chr11:82776102	chr11	82776102	+	UTR	Slfn5,Slfn5os	ENSMUSG00000054404,ENSMUSG00000086327	0.0121345	0.0145407	0.0124578	0.0156935	0.0117216	0.0106128	0.012093	0.0103364	0.0130666	0.0147464	0.0139022	0.00760865	0.0080838	0.011634	0.0141359	0.012003	0.0107605	0.0109036	0.0101726	0.0124406	0.00962706	0.0147863	0.0542208	0.012846	0.0111051
chr11:82776114	chr11	82776114	+	UTR	Slfn5,Slfn5os	ENSMUSG00000054404,ENSMUSG00000086327	0.0105932	0.00927998	0.0118128	0.011022	0.00787829	0.0123983	0.00833515	0.00989139	0.00840075	0.0111352	0.00813576	0.00831301	0.01012	0.0111942	0.011312	0.0109465	0.0129257	0.00916607	0.00971887	0.0110196	0.00910083	0.0123938	0.31399	0.00989844	0.0105646
chr11:82776119	chr11	82776119	+	UTR	Slfn5,Slfn5os	ENSMUSG00000054404,ENSMUSG00000086327	0.0093643	0.00933379	0.0124573	0.0136449	0.0149371	0.013894	0.0140009	0.0144715	0.0107612	0.0136681	0.0121558	0.0102256	0.0108285	0.0122144	0.0126897	0.0130185	0.0138603	0.0137343	0.0140249	0.0130356	0.0127695	0.0134827	0.878811	0.0126081	0.0127167
chr11:82776121	chr11	82776121	+	UTR	Slfn5,Slfn5os	ENSMUSG00000054404,ENSMUSG00000086327	0.00505928	0.00697537	0.00959694	0.0086025	0.00857717	0.0100253	0.00573635	0.00616473	0.00496414	0.00867786	0.00684697	0.00592288	0.00755063	0.00684902	0.00860591	0.00808791	0.00906959	0.00821072	0.0080853	0.00830431	0.00725516	0.00958404	0.370222	0.00738424	0.00795686
chr11:82776122	chr11	82776122	+	UTR	Slfn5,Slfn5os	ENSMUSG00000054404,ENSMUSG00000086327	0.00352508	0.00393218	0.00551492	0.00532207	0.00354633	0.00589141	0.00326696	0.00408846	0.00752862	0.00413348	0.00423246	0.00265581	0.00370706	0.00318553	0.00326877	0.00497681	0.00238418	0.00389884	0.00433395	0.00330111	0.00390587	0.00295251	0.0211784	0.00463472	0.0035064
chr11:82776154	chr11	82776154	+	UTR	Slfn5,Slfn5os	ENSMUSG00000054404,ENSMUSG00000086327	0.00891538	0.0100397	0.0159217	0.0111938	0.0119517	0.0137344	0.0148337	0.0110601	0.0154213	0.0121338	0.0144332	0.0113741	0.0172258	0.0139496	0.0161869	0.0151731	0.0219303	0.0228213	0.0188981	0.019973	0.0160339	0.0172735	0.00124474	0.0126944	0.0173491
chr11:82776158	chr11	82776158	+	UTR	Slfn5,Slfn5os	ENSMUSG00000054404,ENSMUSG00000086327	0.0018622	0.000852515	0.00445675	0.000704722	0.00323792	0.001386	0.00059312	0.00300464	0.00626041	0.0022779	0.00400053	0.00395928	0.00327976	0.00407047	0.00387952	0.00145789	0.0038521	0.00265391	0.00289303	0.00275019	0.002247	0.00323179	0.398718	0.00260334	0.0031159
chr11:82776159	chr11	82776159	+	UTR	Slfn5,Slfn5os	ENSMUSG00000054404,ENSMUSG00000086327	0.019472	0.0184367	0.0209836	0.0142649	0.0222471	0.00836847	0.0114508	0.0223695	0.010765	0.0140947	0.0182961	0.016553	0.0182282	0.0180934	0.0141682	0.0129205	0.0151445	0.0195863	0.0111354	0.0176276	0.020493	0.0226188	0.771353	0.0164317	0.0169608
chr11:95726383	chr11	95726383	+	intergenic	4833417C18Rik,B4galnt2,Gm11534	ENSMUSG00000086015,ENSMUSG00000013418,ENSMUSG00000086255	0.00878946	0.0133885	0.0109973	0.0136571	0.0131453	0.0104433	0.00937485	0.00718717	0.0160728	0.0116278	0.0131839	0.00994592	0.0121925	0.0153549	0.0126758	0.0152598	0.0134502	0.0134225	0.0187858	0.0139733	0.0115361	0.0172169	0.0430993	0.0116243	0.0139831
chr12:112972281	chr12	112972281	+	UTR	Apopt1,Gm15996	ENSMUSG00000037787,ENSMUSG00000090026	0.00834379	0.00920919	0.00734726	0.0167793	0.0200697	0.00456654	0.011011	0.0129773	0.008379	0.00787415	0.00510842	0.0151483	0.0116043	0.0185725	0.0116107	0.0148958	0.0138562	0.0188258	0.0125774	0.0118351	0.0150591	0.0190509	0.0117036	0.0101514	0.0148215
chr12:17436404	chr12	17436404	+	UTR	Nol10	ENSMUSG00000061458	0.0139172	0.011985	0.0156325	0.00741562	0.0120673	0.0148927	0.00664086	0.00152905	0.00308642	0.00929207	0.0145169	0.00495135	0.0147537	0.0155065	0.0121494	0.00841948	0.0103209	0.0144753	0.00909552	0.0085596	0.00708499	0.0133553	0.702636	0.0100887	0.0107884
chr12:17436414	chr12	17436414	+	UTR	Nol10	ENSMUSG00000061458	0.0138129	0.031606	0.0136774	0.0212236	0.021558	0.0346673	0.0237408	0.00811867	0.0118397	0.0119881	0.0144501	0.0151106	0.0358627	0.0287096	0.0230032	0.0275507	0.028734	0.0402458	0.0238216	0.030785	0.0247956	0.0446269	0.00806948	0.0187893	0.029386
chr12:17436466	chr12	17436466	+	UTR	Nol10	ENSMUSG00000061458	0.0194829	0.0215752	0.0265774	0.0282962	0.0265628	0.0233805	0.0196643	0.0256346	0.0216841	0.0245239	0.0217506	0.0219489	0.0364347	0.0444273	0.045833	0.0385041	0.0376119	0.0458301	0.0452992	0.0463664	0.0426562	0.0450624	4.30124e-07	0.0235575	0.0409067
chr12:17436472	chr12	17436472	+	UTR	Nol10	ENSMUSG00000061458	0.0226614	0.016574	0.0300617	0.0206739	0.0160542	0.0174446	0.019859	0.0173668	0.0145275	0.015695	0.0155852	0.0281022	0.0359393	0.0371991	0.0452975	0.0399466	0.0375799	0.0396917	0.0409265	0.0411646	0.0372898	0.045605	2.21161e-09	0.018773	0.0389766
chr12:17436477	chr12	17436477	+	UTR	Nol10	ENSMUSG00000061458	0.0121382	0.0183002	0.0257852	0.0227808	0.0163813	0.0201011	0.013209	0.0169834	0.014797	0.0106062	0.0177403	0.023632	0.0316714	0.0378545	0.0350492	0.0319874	0.0295196	0.0398766	0.0350859	0.0401436	0.0262144	0.0355528	2.30625e-07	0.0171657	0.0333261
chr12:17436481	chr12	17436481	+	UTR	Nol10	ENSMUSG00000061458	0.0126175	0.0287388	0.0269804	0.0301709	0.0143511	0.0172069	0.0234642	0.0161383	0.0186603	0.0119048	0.0117915	0.0244959	0.0325844	0.0360607	0.0417171	0.0313572	0.0353712	0.0304799	0.0387406	0.0418908	0.038153	0.0366269	5.62969e-06	0.019275	0.0352253
chr12:17436491	chr12	17436491	+	UTR	Nol10	ENSMUSG00000061458	0.0424431	0.0664422	0.0343226	0.0300477	0.0270833	0.0532999	0.0293047	0.0639179	0.0517429	0.0102954	0.0423015	0.0332921	0.0393	0.0673788	0.0698142	0.063975	0.0688839	0.0622707	0.0572834	0.0856726	0.0550011	0.0530082	0.0121688	0.0410183	0.0596255
chr12:17436659	chr12	17436659	+	UTR	-,Nol10	none,ENSMUSG00000061458	0.599751	0.722037	0.574085	0.665232	0.573756	0.660125	0.721517	0.570326	0.678763	0.572494	0.646284	0.259259	0.512698	0.732213	0.659091	0.658184	0.654915	0.641077	0.604762	0.732906	0.521678	0.650794	0.471214	0.634943	0.602507
chr12:70409412	chr12	70409412	+	Exon	Klhdc2,Nemf	ENSMUSG00000020978,ENSMUSG00000020982	0.03035	0.0272547	0.0228265	0.025615	0.0330563	0.0318533	0.029209	0.033037	0.0258017	0.018794	0.02317	0.0220743	0.0203797	0.0288267	0.0229223	0.0236712	0.0197717	0.0227161	0.0223826	0.0246192	0.0231904	0.0251299	0.0167761	0.0273607	0.023244
chr12:74271056	chr12	74271056	+	Intron	Mnat1	ENSMUSG00000021103	0.0053712	0.0127655	0.00674045	0.00320361	0.0116111	0.00704288	0.00880247	0.00888792	0.00813422	0.00781757	0.00504195	0.00472422	0.00687364	0.00872999	0.00933536	0.0125188	0.0105669	0.0112537	0.0100192	0.00648809	0.00713826	0.0100858	0.319968	0.00776536	0.0088849
chr12:82056543	chr12	82056543	+	Intron	Slc10a1	ENSMUSG00000021135	0.0042378	0.00788796	0.00523312	0.00454239	0.00502296	0.00326497	0.00393908	0.0049969	0.00255102	0.00344738	0.00443769	0.00227743	0.00618281	0.00732806	0.00910389	0.00316577	0.00666812	0.00483487	0.00712004	0.00472503	0.00662709	0.00532012	0.0984944	0.00450557	0.00575938
chr12:86313369	chr12	86313369	+	Intron	Arel1,Fcf1	ENSMUSG00000042350,ENSMUSG00000021243	0.288889	0.361905	0.358333	0.262626	0.194444	0.206349	0.392857	0.357143	0.309524	0.345238	0.241667	0.0666667	0.047619	0.150794	0.0977564	0.203704	0.166667	0.0846154	0.030303	0.105489	0.122222	0.219336	1.77127e-06	0.301725	0.117743
chr12:86465358	chr12	86465358	+	Intron	-,Dlst	none,ENSMUSG00000004789	0.217949	0.0740741	0.160285	0.329545	0.378451	0.339683	0.203571	0.359687	0.261364	0.19697	0.130952	0.111111	0.0946078	0.132275	0.075	0.0723104	0.0811802	0.136859	0.0625	0.171958	0.143939	0.178968	0.000969842	0.241139	0.11461
chr13:24824364	chr13	24824364	+	UTR	Ripor2	ENSMUSG00000036006	0.00845649	0.00652784	0.00416265	0.00643853	0.00546932	0.00819895	0.00704241	0.00883493	0.00795902	0.0117228	0.00667497	0.0057195	0.00672393	0.00708953	0.010568	0.00690852	0.0096395	0.00541356	0.00599222	0.00759206	0.00993163	0.0081144	0.804759	0.00740799	0.00760844
chr13:54743698	chr13	54743698	+	Intron	Faf2	ENSMUSG00000025873	0.00325203	0.00218741	0.00111857	0.00412343	0.00340445	0.00557062	0.00512185	0.00258502	0.00205761	0.00503308	0.00355847	0.00230089	0.00350824	0.00388437	0.00365888	0.00417714	0.00263527	0.00177177	0.00296677	0.00419045	0.00271951	0.00388025	0.672854	0.00345568	0.00324487
chr13:74497736	chr13	74497736	+	UTR	Ccdc127,Lrrc14b	ENSMUSG00000021578,ENSMUSG00000021579	0.195673	0.206759	0.113991	0.168103	0.0867001	0.134444	0.118615	0.153699	0.209614	0.106645	0.184475	0.161716	0.191572	0.17019	0.197721	0.19869	0.163841	0.173383	0.18514	0.188025	0.228305	0.190626	0.0284109	0.152611	0.186292
chr14:19114856	chr14	19114856	+	UTR	Nkiras1,Ube2e1	ENSMUSG00000021772,ENSMUSG00000021774	0.0134087	0.0109924	0.01518	0.0181305	0.0166779	0.0209893	0.0124143	0.00647741	0.0100355	0.013655	0.0121228	0.00759512	0.0102097	0.0113419	0.010642	0.0149821	0.0108808	0.0148186	0.0118826	0.0127326	0.0134868	0.0110875	0.191002	0.013644	0.0117872
chr14:21516753	chr14	21516753	+	Intron	-,6230400D17Rik,Fut11,Gm25328,Sec24c	none,ENSMUSG00000097577,ENSMUSG00000039357,ENSMUSG00000095087,ENSMUSG00000039367	0.0278047	0.0588677	0.0222572	0.0180614	0.0580302	0.0266459	0.0432706	0.0333951	0.0313853	0.0210229	0.012969	0.0180309	0.0207831	0.0227142	0.014882	0.0275964	0.0223211	0.0168458	0.0266499	0.0209523	0.0182492	0.0227166	0.0306805	0.0321554	0.0210674
chr14:21516754	chr14	21516754	+	Intron	-,6230400D17Rik,Fut11,Gm25328,Sec24c	none,ENSMUSG00000097577,ENSMUSG00000039357,ENSMUSG00000095087,ENSMUSG00000039367	0.0329479	0.0266196	0.0317537	0.0309408	0.0458765	0.0263417	0.0295258	0.0365011	0.0227359	0.0206912	0.0320366	0.0249723	0.0278259	0.0314724	0.0280769	0.041585	0.0337064	0.0329423	0.0389469	0.0357356	0.0345686	0.0391613	0.262073	0.0305428	0.0335449
chr14:22617026	chr14	22617026	+	UTR	Samd8	ENSMUSG00000021770	0.0707071	0.0460317	0.112741	0.13733	0.047619	0.033179	0.0499109	0.0290123	0.0811688	0.0776772	0.0585185	0.0772727	0.0571429	0.0916179	0.115721	0.0222222	0.16888	0.0580808	0.0509913	0.0351852	0.0269841	0.104073	0.729575	0.0676269	0.0734701
chr14:28296632	chr14	28296632	+	UTR	Ccdc66,Fam208a	ENSMUSG00000046753,ENSMUSG00000040651	0.00576132	0.00675187	0.00578431	0.00564483	0.00546864	0.0042946	0.0122733	0.00466798	0.00675369	0.00400581	0.00517428	0.00462763	0.00953912	0.00601633	0.00569219	0.00390366	0.00622365	0.00718095	0.00747329	0.00621352	0.00654016	0.00576915	0.773714	0.00605279	0.00628906
chr14:31386780	chr14	31386780	+	UTR	Mir3076,Tkt	ENSMUSG00000093156,ENSMUSG00000021957	0.0883838	0.0387184	0.034973	0.0871945	0.0388889	0.0691224	0.0416667	0.0340257	0.0925926	0.0502406	0.0164706	0.0952381	0.0779221	0.0706522	0.0666667	0.0779221	0.070303	0.0892857	0.0151515	0.0277778	0.047619	0.200096	0.188281	0.0538434	0.0762395
chr14:99448513	chr14	99448513	+	Intron	Bora,Mzt1	ENSMUSG00000022070,ENSMUSG00000033186	0.333333	0.484127	0.19246	0.497354	0.416667	0.466667	0.273148	0.472222	0.5	0.3	0.322222	0.0666667	0.294444	0.134105	0.267373	0.233766	0.238889	0.201852	0.1294	0.226852	0.151852	0.189542	6.03271e-05	0.387109	0.194067
chr15:8062978	chr15	8062978	+	Intron	Nup155	ENSMUSG00000022142	0.109253	0.200516	0.135317	0.0368873	0.100877	0.109812	0.0675729	0.134304	0.163333	0.289524	0.267702	0.0266667	0.0573671	0.0402633	0.0222222	0.0488215	0.0618908	0.045809	0.0933099	0.0549446	0.132727	0.104024	0.00386401	0.146827	0.0625496
chr16:10840984	chr16	10840984	+	UTR	-,Rmi2	none,ENSMUSG00000037991	0.026455	0.0330655	0.00901442	0.0125786	0.0178378	0.0202661	0.0349849	0.0235765	0.00877193	0.00623053	0.0364953	0.0130509	0.0213864	0.0188417	0.0151216	0.0173349	0.0200069	0.0210882	0.0242088	0.0269508	0.0240158	0.0223626	0.901	0.0208433	0.0203971
chr16:10840987	chr16	10840987	+	UTR	-,Rmi2	none,ENSMUSG00000037991	0.0210526	0.0176981	0.0116557	0.0151385	0.0238263	0.0240821	0.0253378	0.0141302	0.00632911	0.0129505	0.0127954	0.0227919	0.0290857	0.0348424	0.0294665	0.0299112	0.03299	0.0265504	0.0245265	0.0294673	0.0195898	0.0183722	0.000419162	0.0168179	0.027054
chr16:10842055	chr16	10842055	+	UTR	Rmi2	ENSMUSG00000037991	0.0135184	0.00980392	0.0273541	0.0224897	0.0273737	0.0123994	0.0169143	0.0218843	0.026473	0.0202658	0.0169677	0.0150819	0.0196844	0.0157351	0.0221172	0.0182651	0.0235167	0.0222433	0.0156999	0.0103815	0.0172775	0.0123002	0.360604	0.0195858	0.0174821
chr16:10842080	chr16	10842080	+	UTR	Rmi2	ENSMUSG00000037991	0.0190519	0.0302637	0.0310332	0.0354322	0.0176816	0.0309144	0.0130339	0.0166432	0.0244949	0.0164695	0.0193461	0.0138146	0.0221514	0.0217436	0.0252206	0.0351952	0.0314842	0.0258075	0.0247514	0.0212163	0.0252924	0.016199	0.794513	0.0231241	0.0238978
chr16:10842084	chr16	10842084	+	UTR	Rmi2	ENSMUSG00000037991	0.0127604	0.0303948	0.0411339	0.0419295	0.0187572	0.03754	0.0139569	0.0252342	0.0279091	0.0245162	0.0189569	0.0147767	0.0318436	0.0358846	0.035066	0.0328227	0.0303689	0.0349756	0.0287403	0.0233132	0.0281051	0.0266946	0.467703	0.0266445	0.0293265
chr16:10842105	chr16	10842105	+	UTR	-,Rmi2	none,ENSMUSG00000037991	0.00937797	0.0147303	0.00719763	0.014349	0.0141835	0.0167111	0.0130975	0.021409	0.0298542	0.00668373	0.0129754	0.00347701	0.0148501	0.0154589	0.0103939	0.0110556	0.00716384	0.0121793	0.00682098	0.00938524	0.0166867	0.0124068	0.127533	0.0145972	0.010898
chr16:10842111	chr16	10842111	+	UTR	-,Rmi2	none,ENSMUSG00000037991	0.00712286	0.0353493	0.0307625	0.0282595	0.0277142	0.0355809	0.0333518	0.0271991	0.0306928	0.0237952	0.0256366	0.0231592	0.0390659	0.0456998	0.0453268	0.0358584	0.0545246	0.0412568	0.0395781	0.0343937	0.0364659	0.0401555	0.00209207	0.0277695	0.0395895
chr16:10842115	chr16	10842115	+	UTR	-,Rmi2	none,ENSMUSG00000037991	0.0167118	0.00529234	0.00964287	0.00720638	0.0113097	0.0100297	0.0161955	0.0112331	0.0166314	0.002886	0.0104338	0.00536136	0.00862564	0.0127892	0.0058885	0.0105079	0.0129828	0.0151034	0.0101546	0.00869716	0.0125753	0.00887982	0.743926	0.0106884	0.0101423
chr16:13834100	chr16	13834100	+	UTR	Ntan1,Pdxdc1	ENSMUSG00000022681,ENSMUSG00000022680	0.0181463	0.0364737	0.0284436	0.0207354	0.027705	0.023188	0.0180126	0.0306719	0.0169728	0.0416213	0.0262737	0.0178081	0.0324056	0.0259464	0.0312844	0.0370289	0.0361844	0.0334213	0.036931	0.0339487	0.0330908	0.0338119	0.0621748	0.026204	0.0319874
chr16:32299974	chr16	32299974	+	UTR	Rnf168	ENSMUSG00000014074	0.168603	0.175579	0.170696	0.176121	0.150744	0.151244	0.128738	0.127701	0.168386	0.152921	0.198953	0.150522	0.244405	0.243014	0.260087	0.20036	0.227084	0.236892	0.237103	0.177758	0.204158	0.237357	7.11796e-05	0.16088	0.219886
chr16:32299980	chr16	32299980	+	UTR	Rnf168	ENSMUSG00000014074	0.0611873	0.0315948	0.023635	0.025273	0.0483198	0.0438921	0.0337151	0.0343687	0.0291382	0.0144996	0.0259257	0.0222784	0.0427887	0.0303452	0.0466241	0.0269997	0.0607472	0.0379107	0.0385731	0.0292782	0.0385298	0.0576559	0.321608	0.0337772	0.0392483
chr16:32300010	chr16	32300010	+	UTR	Rnf168	ENSMUSG00000014074	0.0224241	0.00461492	0.0300803	0.0172061	0.0311852	0.0201664	0.0168817	0.0286954	0.0386106	0.0184877	0.00375439	0.0138714	0.022389	0.0647557	0.0427848	0.014146	0.0158308	0.0311362	0.022866	0.0341766	0.0197389	0.0520908	0.13932	0.0211006	0.0303442
chr16:41984270	chr16	41984270	+	Intron	Lsamp	ENSMUSG00000061080	0.333333	0.666667	0.555556	0.805861	0.766667	0.666667	0.238095	0.2	1	0.666667	0.555556	0.444444	0.740079	0.645238	0.57265	0.505848	0.402564	0.680519	0.833333	0.8	0.837607	0.788462	0.422021	0.586824	0.659159
chr16:41984286	chr16	41984286	+	Intron	Lsamp	ENSMUSG00000061080	0.333333	0.666667	0.555556	0.805861	0.766667	0.666667	0.238095	0.2	1	0.666667	0.555556	0.444444	0.719444	0.645238	0.548611	0.487329	0.402564	0.680519	0.833333	0.8	0.837607	0.788462	0.461179	0.586824	0.653414
chr16:75602100	chr16	75602100	+	UTR	Rbm11	ENSMUSG00000032940	0.00529352	0.00278511	0.00407552	0.00393037	0.00458031	0.00940406	0.00652546	0.00560257	0.00751395	0.00695023	0.00396368	0.00455872	0.00596243	0.00563486	0.00696074	0.00657074	0.00378356	0.00527985	0.00655011	0.00599591	0.00649669	0.0061666	0.646573	0.00551134	0.00581456
chr17:13209679	chr17	13209679	+	UTR	Sod2	ENSMUSG00000006818	0.00630389	0.00315972	0.00773735	0.00674583	0.00566924	0.00497095	0.00564292	0.00618732	0.00195312	0.00794593	0.00327667	0.00456101	0.0122166	0.0111964	0.00922413	0.00929953	0.00899323	0.00580287	0.0102835	0.00954788	0.0104556	0.00939558	0.00038813	0.00541754	0.00917967
chr17:17325021	chr17	17325021	+	intergenic	-	none	0.333333	0.358333	0.555556	0.330357	0.333333	0.460784	0.333333	0.0666667	0.375	0.616667	0.555556	0.378917	0.501984	0.515622	0.496633	0.492734	0.444872	0.270853	0.379243	0.334225	0.584524	0.43573	0.389844	0.392629	0.439576
chr17:17596079	chr17	17596079	+	UTR	Lix1	ENSMUSG00000047786	0.00324609	0.00183325	0.00373255	0.00297625	0.00450526	0.00377889	0.00180411	0.0073711	0.00307788	0.00568694	0.00205759	0.0028947	0.00291826	0.00357153	0.00424751	0.00422388	0.0025257	0.00389287	0.00405639	0.00337286	0.00493384	0.00434088	0.884007	0.00364272	0.00372531
chr17:28870819	chr17	28870819	+	Intron	Mapk14	ENSMUSG00000053436	0.913725	1	1	1	1	1	0.933333	1	1	0.916667	0.933333	0.666667	1	0.944444	1	0.944444	0.933333	0.916667	1	0.944444	0.925926	0.962963	0.184238	0.97246	0.930808
chr17:34065477	chr17	34065477	+	UTR	Rgl2,Tapbp	ENSMUSG00000041354,ENSMUSG00000024308	0.00327874	0.00268988	0.0031483	0.00112798	0.00666558	0.00714911	0.00760966	0.00504441	0.00405615	0.00463596	0.00580354	0.00812811	0.0118221	0.0110973	0.00616193	0.0067922	0.00841729	0.0108361	0.0125315	0.0119386	0.00730432	0.00821753	5.25145e-05	0.00465539	0.00938609
chr17:34065499	chr17	34065499	+	UTR	Rgl2,Tapbp	ENSMUSG00000041354,ENSMUSG00000024308	0.0192393	0.0127637	0.0140694	0.0156729	0.0216375	0.0156485	0.0113372	0.0165646	0.00785024	0.0105726	0.013915	0.0174781	0.0210308	0.0210289	0.0223438	0.0247221	0.0214955	0.0273575	0.0265277	0.0262781	0.0199826	0.0222534	2.12814e-05	0.0144792	0.0227726
chr17:34065501	chr17	34065501	+	UTR	Rgl2,Tapbp	ENSMUSG00000041354,ENSMUSG00000024308	0.00973112	0.0125827	0.0118064	0.0107711	0.00981231	0.0116757	0.0120006	0.0107129	0.0033389	0.013857	0.0114112	0.00946873	0.0165499	0.0129853	0.0141736	0.0130058	0.0131463	0.0159137	0.012053	0.0161653	0.0154886	0.0152701	0.00466073	0.0107	0.01402
chr17:34065524	chr17	34065524	+	UTR	Rgl2,Tapbp	ENSMUSG00000041354,ENSMUSG00000024308	0.138709	0.116584	0.169564	0.0975444	0.142407	0.131116	0.1772	0.133603	0.131313	0.0953126	0.102062	0.100716	0.141658	0.151359	0.139188	0.146756	0.155873	0.157049	0.168311	0.172919	0.139138	0.184365	0.0689733	0.130492	0.150667
chr17:35994679	chr17	35994679	+	UTR	Mdc1,Nrm,Ppp1r18os	ENSMUSG00000061607,ENSMUSG00000059791,ENSMUSG00000087443	0.209848	0.0687646	0.14152	0.195216	0.1907	0.15873	0.143304	0.139995	0.184332	0.177439	0.184115	0.108225	0.0957265	0.224242	0.0277778	0.030303	0.204377	0.134921	0.0555556	0.158249	0.0333333	0.108225	0.0297514	0.163088	0.107358
chr17:35995831	chr17	35995831	+	UTR	Mdc1,Nrm,Ppp1r18os	ENSMUSG00000061607,ENSMUSG00000059791,ENSMUSG00000087443	0.0127706	0.00710786	0.00717956	0.00849846	0.0162582	0.0109906	0.0147415	0.00473362	0.00976683	0.0104987	0.0112466	0.00796309	0.0088888	0.00933735	0.0103658	0.0111399	0.0114035	0.0115124	0.00899113	0.011945	0.00669415	0.00653821	0.496467	0.0103448	0.0095254
chr17:35995835	chr17	35995835	+	UTR	Mdc1,Nrm,Ppp1r18os	ENSMUSG00000061607,ENSMUSG00000059791,ENSMUSG00000087443	0.0111418	0.00283462	0.00923247	0.004253	0.00552905	0.00651693	0.00737382	0.00728828	0.0070308	0.000923361	0.00527639	0.00530064	0.00663645	0.00725565	0.00978121	0.00676667	0.00788947	0.00579683	0.00757611	0.00655331	0.00652222	0.0096072	0.257944	0.00612732	0.00724416
chr17:35995842	chr17	35995842	+	UTR	Mdc1,Nrm,Ppp1r18os	ENSMUSG00000061607,ENSMUSG00000059791,ENSMUSG00000087443	0.0125813	0.0144909	0.0116664	0.0120632	0.0120379	0.0203653	0.00903938	0.00818919	0.0136152	0.0110614	0.0130543	0.0067514	0.00826771	0.0105509	0.0121684	0.0105469	0.00835333	0.00842166	0.0113826	0.00933869	0.011784	0.0092251	0.0163907	0.0125604	0.00970825
chr17:35995847	chr17	35995847	+	UTR	Mdc1,Nrm,Ppp1r18os	ENSMUSG00000061607,ENSMUSG00000059791,ENSMUSG00000087443	0.0202528	0.0141455	0.0189806	0.0169534	0.0166166	0.0235134	0.0159853	0.0194455	0.0275224	0.0176707	0.0168162	0.0109394	0.0122733	0.0186111	0.018018	0.0164182	0.015801	0.018971	0.0190369	0.0160638	0.0224143	0.0163233	0.177191	0.0189002	0.0168064
chr17:35995864	chr17	35995864	+	UTR	Mdc1,Nrm,Ppp1r18os	ENSMUSG00000061607,ENSMUSG00000059791,ENSMUSG00000087443	0.0182484	0.0197737	0.0226803	0.0144796	0.0192331	0.0225984	0.0217529	0.0290334	0.0229155	0.0218115	0.0222918	0.0195418	0.0263687	0.0328648	0.0348341	0.0268637	0.0255921	0.0288375	0.0273353	0.0280426	0.0316954	0.0319093	0.000355145	0.0213472	0.028535
chr17:35995867	chr17	35995867	+	UTR	Mdc1,Nrm,Ppp1r18os	ENSMUSG00000061607,ENSMUSG00000059791,ENSMUSG00000087443	0.0190177	0.0233689	0.0226752	0.0244311	0.0199647	0.0193148	0.0223744	0.0244566	0.0213488	0.0252909	0.0184017	0.00875304	0.0139516	0.0122695	0.0157628	0.0112748	0.0154053	0.0136323	0.016194	0.0134584	0.0110779	0.0147349	4.34581e-08	0.0218768	0.0133195
chr17:35995902	chr17	35995902	+	UTR	Mdc1,Nrm,Ppp1r18os	ENSMUSG00000061607,ENSMUSG00000059791,ENSMUSG00000087443	0.00197239	0.00307568	0.00304371	0.00154723	0.00572782	0.00447329	0.003367	0.00529532	0.00534202	0.00288774	0.00498772	0.00504771	0.00677124	0.0129292	0.00913955	0.00755274	0.00900659	0.00663202	0.0111789	0.0111825	0.0105613	0.0064731	1.23831e-05	0.00379272	0.00877045
chr17:36048819	chr17	36048819	+	Exon	Atat1,Gm16279,Mrps18b,Ppp1r10	ENSMUSG00000024426,ENSMUSG00000084998,ENSMUSG00000024436,ENSMUSG00000039220	0.0170097	0.0155114	0.019431	0.021054	0.0128361	0.0190348	0.023786	0.0190196	0.0131377	0.0199639	0.0167652	0.0227052	0.0389735	0.0347583	0.0347601	0.032437	0.0329997	0.0333213	0.0352402	0.0353094	0.0387876	0.0380889	4.80339e-09	0.017959	0.0343074
chr17:36048824	chr17	36048824	+	Exon	Atat1,Gm16279,Mrps18b,Ppp1r10	ENSMUSG00000024426,ENSMUSG00000084998,ENSMUSG00000024436,ENSMUSG00000039220	0.00858231	0.0154861	0.010937	0.0172378	0.0112248	0.0177256	0.0169674	0.016489	0.00984971	0.0105088	0.0171898	0.0155622	0.0265882	0.0235804	0.0246248	0.0299671	0.0228144	0.0261627	0.0274787	0.025571	0.0269958	0.0247653	5.97404e-07	0.0138362	0.0249191
chr17:36048838	chr17	36048838	+	Exon	Atat1,Gm16279,Mrps18b,Ppp1r10	ENSMUSG00000024426,ENSMUSG00000084998,ENSMUSG00000024436,ENSMUSG00000039220	0.0298891	0.026456	0.0285915	0.0309316	0.0203045	0.0305486	0.031746	0.0307211	0.0191973	0.0277536	0.0292105	0.0298155	0.0483389	0.0454494	0.0468292	0.0489325	0.0460162	0.0540787	0.0459886	0.0468664	0.0515971	0.0465022	6.41532e-08	0.0277591	0.0464013
chr17:36143421	chr17	36143421	+	UTR	A930015D03Rik,H2-T24	ENSMUSG00000092368,ENSMUSG00000053835	0.0232244	0.0265176	0.0195519	0.0189979	0.0216631	0.0234813	0.0234792	0.017871	0.0310604	0.0146508	0.0106308	0.0106348	0.0171644	0.0127981	0.015382	0.0150823	0.0190888	0.0194995	0.0175916	0.0178033	0.0153708	0.020776	0.0278562	0.0210117	0.016472
chr17:36143426	chr17	36143426	+	UTR	A930015D03Rik,H2-T24	ENSMUSG00000092368,ENSMUSG00000053835	0.00936373	0.0143229	0.0145076	0.0157604	0.0143647	0.0177261	0.0134453	0.0169616	0.0151846	0.00951922	0.0159146	0.0146029	0.0153376	0.0208281	0.0222103	0.0226862	0.0223476	0.0239756	0.0253243	0.018412	0.0215406	0.0244204	5.98919e-05	0.0142792	0.0210623
chr17:36143429	chr17	36143429	+	UTR	A930015D03Rik,H2-T24	ENSMUSG00000092368,ENSMUSG00000053835	0.00360289	0.0040572	0.00352324	0.00810686	0.00337347	0.00114852	0.00344468	0.00328929	0.00281756	0.00565107	0.002715	0.00380992	0.00839324	0.00531835	0.00440244	0.00702713	0.00692214	0.00587489	0.00446063	0.0045927	0.00855144	0.00911813	0.00556928	0.00379362	0.00622464
chr17:36143430	chr17	36143430	+	UTR	A930015D03Rik,H2-T24	ENSMUSG00000092368,ENSMUSG00000053835	0.000643501	0.00429829	0.0018679	0.00376873	0.00190163	0.00546983	0.0034585	0.00241768	0.00663939	0.000706215	0.00148148	0.00204661	0.00301432	0.00413528	0.00446646	0.00441014	0.00284677	0.00406376	0.00385077	0.00577459	0.00452737	0.00359895	0.179517	0.00296847	0.003885
chr17:36143433	chr17	36143433	+	UTR	A930015D03Rik,H2-T24	ENSMUSG00000092368,ENSMUSG00000053835	0.00203227	0.0028153	0.00206068	0.00395924	0.000491642	0.000878349	0.00400435	0.00195722	0.00341789	0.00226684	0.0016129	0.00154027	0.0035263	0.00188304	0.00312229	0.00358129	0.00185889	0.00243747	0.00215014	0.0035709	0.0023167	0.00448838	0.323121	0.00231788	0.00277052
chr17:39984527	chr17	39984527	+	Exon	-,AY036118,CT010467.1,Gm26917,Gm42418	none,ENSMUSG00000105361,ENSMUSG00000106106,ENSMUSG00000097971,ENSMUSG00000098178	0.00936468	0.00805132	0.0146189	0.0100437	0.00769068	0.0135082	0.0132338	0.0130825	0.0106972	0.0109838	0.0127724	0.00188051	0.00245137	0.00236481	0.00240597	0.00260413	0.00231506	0.00225439	0.00261563	0.00221706	0.00236992	0.00270182	5.71853e-11	0.011277	0.00238006
chr18:32262582	chr18	32262582	+	UTR	Iws1	ENSMUSG00000024384	0.0227523	0.0456321	0.0327996	0.0239324	0.0200769	0.0327363	0.0286186	0.0276741	0.0188033	0.016743	0.0157582	0.0197195	0.0251027	0.0232621	0.0236429	0.035114	0.0292444	0.0364778	0.0312206	0.0178563	0.0397832	0.0342269	0.436245	0.025957	0.0286955
chr18:32262585	chr18	32262585	+	UTR	Iws1	ENSMUSG00000024384	0.0147741	0.0183538	0.020988	0.0283585	0.00954301	0.0142915	0.0147964	0.0134512	0.0221851	0.0231796	0.0310954	0.0158209	0.0127337	0.0237794	0.0213539	0.0167007	0.014396	0.0200723	0.0250195	0.0311343	0.0177463	0.0207342	0.767494	0.0191833	0.0199537
chr18:42717480	chr18	42717480	+	Intron	-,Tcerg1	none,ENSMUSG00000024498	0.163835	0.128362	0.19076	0.136266	0.137193	0.0909404	0.172532	0.182386	0.0894118	0.125	0.105207	0.0975876	0.139017	0.134755	0.0830273	0.174617	0.15109	0.118393	0.106838	0.152009	0.124743	0.123296	0.435594	0.138354	0.127761
chr18:65638099	chr18	65638099	+	UTR	-,Malt1	none,ENSMUSG00000032688	0.00435089	0.00330383	0.00528014	0.00614979	0.00341679	0.00640915	0.00735534	0.00287991	0.00414553	0.0069517	0.00425275	0.00537791	0.00666373	0.00663156	0.00610979	0.00708832	0.00694998	0.00641583	0.00757677	0.00648117	0.00546027	0.00675843	0.0065736	0.00495417	0.00650125
chr18:65638102	chr18	65638102	+	UTR	-,Malt1	none,ENSMUSG00000032688	0.00293851	0.00172504	0.00247494	0.000932425	0.00518518	0.00211741	0.00395794	0.0045513	0.00695529	0.00307985	0.00147687	0.00364012	0.00463851	0.00322262	0.00398753	0.00302496	0.00358997	0.00315119	0.00417257	0.00450287	0.00537775	0.0031507	0.288625	0.0032177	0.00385989
chr18:65638103	chr18	65638103	+	UTR	-,Malt1	none,ENSMUSG00000032688	0.00724674	0.00584074	0.00796707	0.0090018	0.0126482	0.00484618	0.00751724	0.0113067	0.0108379	0.00844757	0.00717377	0.00624633	0.00824876	0.00823475	0.00814018	0.0137394	0.00895722	0.0107753	0.00922354	0.013431	0.00980848	0.0086125	0.261045	0.00843945	0.0095834
chr18:67936866	chr18	67936866	+	Intron	Gm26910,Seh1l	ENSMUSG00000097835,ENSMUSG00000079614	0.125	0.0555556	0.163636	0.22619	0.241582	0.125	0.208333	0.175	0.366667	0.0416667	0.379365	0.0846561	0.106692	0.0909091	0.0166667	0.0942982	0.0333333	0.0589744	0.0578002	0.0525794	0.0640182	0.0277778	0.0012172	0.191636	0.0625187
chr19:45082916	chr19	45082916	+	Intron	Mrpl43,Twnk	ENSMUSG00000025208,ENSMUSG00000025209	0.443529	0.298413	0.201282	0.2571	0.291925	0.301646	0.257937	0.233448	0.177647	0.250414	0.309847	0.111111	0.2	0.0525794	0.192222	0.179441	0.154904	0.0803394	0.195298	0.150383	0.0839947	0.221068	0.00014263	0.274835	0.147395
chr19:46669659	chr19	46669659	+	UTR	Sfxn2,Wbp1l	ENSMUSG00000025036,ENSMUSG00000047731	0.469697	0.414305	0.528221	0.293519	0.530756	0.446625	0.315245	0.476084	0.543403	0.45977	0.480324	0.0666667	0.341667	0.489899	0.391667	0.296296	0.342857	0.592593	0.444444	0.537698	0.398148	0.491005	0.312543	0.450723	0.399358
chr19:46669665	chr19	46669665	+	UTR	Sfxn2,Wbp1l	ENSMUSG00000025036,ENSMUSG00000047731	0.392434	0.344071	0.459129	0.205473	0.43254	0.380777	0.283339	0.442028	0.487847	0.383979	0.414871	0.030303	0.329545	0.405556	0.261905	0.25	0.261111	0.481481	0.365657	0.537698	0.346154	0.410714	0.311777	0.384226	0.334557
chr19:46670181	chr19	46670181	+	UTR	Sfxn2,Wbp1l	ENSMUSG00000025036,ENSMUSG00000047731	0.0165581	0.00806138	0.0239591	0.023622	0.031876	0.0198122	0.0153874	0.02178	0.0111111	0.0534859	0.0189573	0.0157382	0.0254665	0.0131571	0.0216359	0.0153638	0.0188446	0.0258323	0.0248632	0.0260046	0.0262793	0.0234111	0.856299	0.0222373	0.0215088
chr19:57559853	chr19	57559853	+	Exon	Trub1	ENSMUSG00000025086	0.12037	0.181819	0.176398	0.121799	0.174206	0.125775	0.122859	0.153066	0.254795	0.128999	0.117231	0.0900933	0.162024	0.17457	0.148905	0.180397	0.17369	0.178483	0.180664	0.140629	0.130919	0.144932	0.868963	0.152483	0.155028
chr19:8928073	chr19	8928073	+	UTR	Bscl2,Lrrn4cl	ENSMUSG00000071657,ENSMUSG00000071656	0.0181807	0.0340463	0.0176201	0.0242396	0.0462577	0.0201347	0.0171342	0.0318373	0.0227273	0.0297632	0.015409	0.0308972	0.0494357	0.0347569	0.0499111	0.0235496	0.0432633	0.0710232	0.0328055	0.0524806	0.0496506	0.0627332	0.000805028	0.0252137	0.0455006
chr1:133828093	chr1	133828093	+	UTR	Gm37676,Nucks1	ENSMUSG00000103975,ENSMUSG00000026434	0.0049309	0.00181147	0.00529262	0.0046272	0.00531168	0.0107892	0.00501465	0.00406682	0.00582578	0.00644065	0.00348915	0.00604816	0.0103513	0.00727673	0.0102772	0.00897022	0.00726222	0.00587149	0.00817175	0.00662325	0.00874597	0.00836866	0.00291354	0.00523637	0.007997
chr1:145596692	chr1	145596692	+	UTR	Glrx2,Trove2	ENSMUSG00000018196,ENSMUSG00000018199	0.0190273	0.0184341	0.0068583	0.0098424	0.0121327	0.00814466	0.00988796	0.00936429	0.012626	0.0162483	0.0166183	0.00820858	0.0103014	0.0131875	0.0114098	0.00886183	0.010416	0.0123435	0.00807118	0.0131194	0.0124082	0.0118401	0.234602	0.0126531	0.0109243
chr1:174022479	chr1	174022479	+	Exon	Copa,Gm37756,Gm38164	ENSMUSG00000026553,ENSMUSG00000103380,ENSMUSG00000102779	0.244102	0.217208	0.23025	0.24581	0.265522	0.26078	0.233486	0.213972	0.305365	0.335993	0.282527	0.0416667	0.197955	0.131997	0.185749	0.174074	0.10421	0.136835	0.243868	0.329645	0.255983	0.260965	0.0181965	0.257729	0.187541
chr1:187181075	chr1	187181075	+	UTR	4930532G15Rik,Bpnt1	ENSMUSG00000097261,ENSMUSG00000026617	0.0112276	0.0103457	0.0111697	0.0105818	0.0101705	0.0109877	0.00973442	0.0125194	0.00798083	0.0106165	0.0100076	0.00434684	0.00710251	0.00741279	0.00751329	0.00929764	0.00888686	0.00810013	0.00706644	0.0101921	0.0103547	0.0067663	0.000507419	0.0104856	0.00791269
chr1:4831604	chr1	4831604	+	Exon	Gm37988,Lypla1	ENSMUSG00000104217,ENSMUSG00000025903	0.00969402	0.0102943	0.0140179	0.0124387	0.0124904	0.0138513	0.0141451	0.014791	0.00783255	0.0099808	0.0107987	0.0103455	0.0128903	0.0143352	0.0123965	0.0119129	0.0157976	0.0122911	0.0113076	0.00952474	0.0117021	0.0118105	0.678008	0.0118486	0.0122103
chr1:4831623	chr1	4831623	+	Exon	Gm37988,Lypla1	ENSMUSG00000104217,ENSMUSG00000025903	0.121206	0.104332	0.0251662	0.0869396	0.0608305	0.0597148	0.00925926	0.133394	0.171429	0.0741962	0.126863	0.095679	0.103586	0.11164	0.0767551	0.122892	0.117992	0.112206	0.0735931	0.112347	0.0981277	0.104756	0.369041	0.0884846	0.102689
chr1:60535434	chr1	60535434	+	UTR	Abi2,Raph1	ENSMUSG00000026782,ENSMUSG00000026014	0.0137686	0.0114874	0.0118559	0.0110661	0.0100549	0.00750704	0.00883002	0.00976185	0.00680603	0.00805098	0.00364299	0.00648835	0.00428431	0.00781468	0.00838233	0.00787236	0.00894984	0.00805794	0.00692442	0.00765849	0.00851383	0.00675196	0.0519561	0.00934835	0.00742714
chr1:82845880	chr1	82845880	+	Intron	Agfg1	ENSMUSG00000026159	0.583333	0.540404	0.777778	0.84127	0.777778	0.304762	0.444444	0.672222	0.75	0.35	0.416667	0.187364	0.341709	0.361111	0.344508	0.135088	0.18954	0.301242	0.310101	0.109428	0.312865	0.279365	4.72498e-05	0.587151	0.26112
chr1:95257392	chr1	95257392	+	Intron	Gm26446,Ppp1r7	ENSMUSG00000064389,ENSMUSG00000026275	0.99187	0.981036	1	0.994048	0.993333	0.97561	0.985816	1	0.991228	0.991453	1	0.569444	0.946581	0.708333	0.916667	0.958333	0.865385	0.775253	0.877288	0.789683	0.893308	0.829219	0.000157849	0.991309	0.829954
chr1:95263372	chr1	95263372	+	UTR	Gm26446,Ppp1r7	ENSMUSG00000064389,ENSMUSG00000026275	0.00264258	0.00457825	0.00380281	0.00498454	0.00804004	0.00435914	0.00377814	0.00479095	0.0048378	0.00249057	0.00696838	0.00207637	0.00424651	0.0108125	0.00925195	0.00604397	0.00839975	0.00813308	0.00956155	0.00791331	0.00920201	0.00835246	0.00406967	0.0046612	0.00763577
chr1_random:297723	chr1_random	297723	+	UTR	Aida,Mia3	ENSMUSG00000042901,ENSMUSG00000056050	0.0232669	0.00701754	0.00816993	0.01488	0.0191021	0.0206333	0.011236	0.00333333	0.0111111	0.00813008	0.00462963	0.0122417	0.01606	0.0178793	0.0171743	0.0213921	0.0233529	0.0106184	0.0224082	0.0219721	0.0192041	0.0218451	0.0118485	0.0119554	0.0185589
chr1_random:383211	chr1_random	383211	+	UTR	Gm37986,Taf1a	ENSMUSG00000104212,ENSMUSG00000072258	0.0222125	0.0206976	0.025894	0.0235507	0.0314153	0.0415826	0.0599206	0.018586	0.0495785	0.031893	0.029369	0.0367009	0.0454699	0.0555441	0.0622059	0.0532589	0.0710279	0.0652434	0.0666618	0.0811126	0.0429	0.0769716	0.00013327	0.0322454	0.0597361
chr2:121011461	chr2	121011461	+	Exon	Tubgcp4	ENSMUSG00000027263	0.0175349	0.0136552	0.0130919	0.0167886	0.015382	0.021245	0.0175809	0.0189681	0.0146965	0.0196121	0.0181831	0.0124841	0.0222699	0.0199095	0.0188101	0.0161361	0.0217647	0.017489	0.0217356	0.0167793	0.0244243	0.0216358	0.0754404	0.0169762	0.0194035
chr2:126862724	chr2	126862724	+	Exon	Ap4e1,Gm24081	ENSMUSG00000001998,ENSMUSG00000092918	0.0034262	0.00339205	0.00310102	0.00398252	0.00350548	0.00239089	0.00382398	0.00484853	0.00319941	0.00233404	0.0041504	0.00301715	0.00521301	0.00367409	0.00399661	0.00345264	0.00397121	0.00251058	0.00419079	0.0052397	0.00333416	0.00296904	0.377837	0.00346859	0.003779
chr2:127110778	chr2	127110778	+	UTR	Stard7	ENSMUSG00000027367	0.0307407	0.0189372	0.0433027	0.0522162	0.0340771	0.0247631	0.0289634	0.0411808	0.0511509	0.0387093	0.0309455	0.0102109	0.0226806	0.052816	0.0542043	0.0564286	0.0442508	0.0938266	0.0460705	0.0516298	0.0567379	0.058748	0.0658888	0.0359079	0.0497822
chr2:14069614	chr2	14069614	+	UTR	Gm37499,Stam	ENSMUSG00000103901,ENSMUSG00000026718	0.0566338	0.0662178	0.0765526	0.068445	0.0752888	0.0780781	0.0711789	0.0609265	0.0687802	0.055115	0.060513	0.0431894	0.089904	0.0491465	0.0378648	0.0860795	0.0535018	0.0617958	0.0738265	0.0740882	0.0858638	0.100105	0.814167	0.0670663	0.0686696
chr2:14069618	chr2	14069618	+	UTR	Gm37499,Stam	ENSMUSG00000103901,ENSMUSG00000026718	0.0118535	0.00398117	0.00335354	0.00767326	0.00234742	0.00401447	0.00838041	0.0017094	0.00241546	0.00780914	0.0141636	0.00436518	0.00566791	0.00676994	0.0109996	0.0091155	0.00658062	0.00614631	0.00632749	0.00723431	0.00624238	0.00760795	0.538926	0.00615466	0.0070052
chr2:143401286	chr2	143401286	+	Exon	Pcsk2	ENSMUSG00000027419	0.0448347	0.0484817	0.0247967	0.0342047	0.0407429	0.0324147	0.0806029	0.0469031	0.0738381	0.0295075	0.0244925	0.0149767	0.0821125	0.0584618	0.0550633	0.0693514	0.0858551	0.100824	0.0438609	0.0381316	0.0620707	0.0648523	0.0667201	0.0437109	0.0614146
chr2:143401310	chr2	143401310	+	Exon	Pcsk2	ENSMUSG00000027419	0.103621	0.0239691	0.00387597	0.00501253	0.00225225	0.0762223	0.0130793	0.0065683	0.00769231	0.0255462	0.0118927	0.00246914	0.0587816	0.012332	0.0175926	0.043445	0.00760277	0.0470999	0.0187328	0.0190671	0.0315595	0.0690441	0.720659	0.0254302	0.0297933
chr2:28986563	chr2	28986563	+	Intron	Setx	ENSMUSG00000043535	0.231812	0.175666	0.266816	0.253416	0.273939	0.268029	0.217501	0.21615	0.20625	0.252351	0.270971	0.149416	0.203332	0.219248	0.196262	0.196024	0.203936	0.227562	0.201252	0.208619	0.227522	0.245767	0.0160591	0.239355	0.207176
chr2:38863867	chr2	38863867	+	Intron	-,Arpc5l,Rpl35,Wdr38	none,ENSMUSG00000026755,ENSMUSG00000062997,ENSMUSG00000035295	0.936119	0.972636	0.954543	0.947975	0.954346	0.951277	0.961268	0.950907	0.947489	0.964773	0.971356	0.527778	0.876254	0.76728	0.823047	0.81195	0.838235	0.755454	0.773625	0.774964	0.795821	0.784513	1.83498e-06	0.955699	0.775356
chr2:51999512	chr2	51999512	+	Intron	Neb	ENSMUSG00000026950	0.333333	0.666667	0.555556	0.666667	0.333333	0.333333	0.666667	0.380952	0.5	0.666667	1	0.666667	0.111111	0.759259	0.888889	0.111111	1	0.650794	0.533333	0.833333	0.822222	0.645833	0.44693	0.554834	0.638414
chr2:71067254	chr2	71067254	+	Exon	Dync1i2	ENSMUSG00000027012	0.0169257	0.0200976	0.0123457	0.0232579	0.00994624	0.0247521	0.0231919	0.0256341	0.0140187	0.0103642	0.00919582	0.0190923	0.0251518	0.0342567	0.02674	0.0327817	0.0177824	0.0256082	0.0290399	0.0202464	0.0237245	0.0334418	0.0025891	0.0172482	0.0261696
chr3:102870648	chr3	102870648	+	UTR	Gm43062,Nras	ENSMUSG00000104671,ENSMUSG00000027852	0.0248226	0.0263801	0.0267461	0.0257662	0.0210662	0.0262257	0.0171335	0.0256781	0.0274913	0.026272	0.0275836	0.0115311	0.0101287	0.0129617	0.0122739	0.0162023	0.013855	0.0134698	0.0115912	0.0185613	0.0101856	0.0114807	3.88689e-09	0.025015	0.012931
chr3:102870649	chr3	102870649	+	UTR	Gm43062,Nras	ENSMUSG00000104671,ENSMUSG00000027852	0.0119339	0.00643964	0.0062182	0.00710577	0.00687985	0.00458104	0.00785745	0.00587674	0.00969257	0.00911165	0.0110721	0.00615865	0.0130473	0.0111544	0.0103925	0.00957784	0.0166895	0.0169033	0.0174183	0.0209757	0.0111682	0.014835	0.00110372	0.00788808	0.0134837
chr3:116332480	chr3	116332480	+	UTR	Gm42457,Gm42893,Mfsd14a,Sass6	ENSMUSG00000105339,ENSMUSG00000106415,ENSMUSG00000089911,ENSMUSG00000027959	0.00158069	0.000400641	0.00204716	0.00149169	0.0014534	0.00260123	0.00127517	0.00200134	0.0012772	0.00184654	0.00117707	0.00396947	0.00501201	0.00579299	0.00477771	0.00361316	0.00639648	0.00730074	0.00373538	0.00442173	0.00621374	0.00664783	2.66643e-08	0.00155928	0.00526193
chr3:121962255	chr3	121962255	+	Intron	Gclm,Gm17494,Gm6061	ENSMUSG00000028124,ENSMUSG00000057359,ENSMUSG00000093392	0.969697	0.830556	0.906061	0.88547	0.889855	1	0.884259	0.706816	0.861538	0.931548	0.815058	0.277778	0.592857	0.388889	0.432479	0.455556	0.198413	0.4	0.477778	0.35	0.229437	0.155556	4.96312e-10	0.880078	0.359886
chr3:122559199	chr3	122559199	+	UTR	Pde5a	ENSMUSG00000053965	0.0925926	0.0944444	0.0238095	0.217251	0.198039	0.2	0.107407	0.259921	0.25	0.0747475	0.205735	0.0411594	0.0753481	0.115935	0.183461	0.131396	0.0564571	0.129653	0.13549	0.10787	0.0672101	0.136882	0.0856587	0.156723	0.107351
chr3:35991360	chr3	35991360	+	UTR	Acad9,Gm43079,Gm43205	ENSMUSG00000027710,ENSMUSG00000105055,ENSMUSG00000105419	0.131937	0.253135	0.176525	0.215793	0.169419	0.143105	0.140411	0.155439	0.0724187	0.129341	0.233282	0.0809051	0.156067	0.145487	0.136485	0.113079	0.12799	0.130524	0.138363	0.124875	0.121474	0.138291	0.039705	0.165528	0.128504
chr3:35991373	chr3	35991373	+	UTR	Acad9,Gm43079,Gm43205	ENSMUSG00000027710,ENSMUSG00000105055,ENSMUSG00000105419	0.0162347	0.0265585	0.0175947	0.0141831	0.0598847	0.0436186	0.0346242	0.01882	0.0107459	0.0117216	0.0486175	0.00679119	0.0189604	0.0194205	0.0438956	0.0205433	0.0215013	0.0218708	0.0159444	0.0279265	0.0180514	0.0182948	0.285536	0.0275094	0.0212
chr3:35991416	chr3	35991416	+	UTR	Acad9,Gm43079,Gm43205	ENSMUSG00000027710,ENSMUSG00000105055,ENSMUSG00000105419	0.0133791	0.0424861	0.0109625	0.0120494	0.0186632	0.0322787	0.00746237	0.0188216	0.0124577	0.0133063	0.0199671	0.0194626	0.0266617	0.0195223	0.021798	0.0272913	0.0332341	0.023497	0.0253932	0.0255182	0.0278423	0.0242009	0.0629447	0.0183485	0.0249474
chr3:35991496	chr3	35991496	+	UTR	Acad9,Gm43079,Gm43205	ENSMUSG00000027710,ENSMUSG00000105055,ENSMUSG00000105419	0.761813	0.846335	0.677692	0.81147	0.76004	0.765056	0.724715	0.79425	0.739282	0.79232	0.692625	0.608206	0.789598	0.778081	0.79254	0.874813	0.746784	0.823546	0.824676	0.834821	0.880775	0.831412	0.175255	0.760509	0.798659
chr3:51030027	chr3	51030027	+	Intron	-,Noct	none,ENSMUSG00000023087	0.125	0.222222	0.0952381	0.180556	0.0666667	0.229938	0.391667	0.15	0.2	0.244444	0.4	0.25	0.289272	0.283249	0.116667	0.201656	0.0830999	0.240605	0.334174	0.265242	0.434295	0.186819	0.441276	0.209612	0.244098
chr3:51050527	chr3	51050527	+	UTR	Noct	ENSMUSG00000023087	0.224074	0.0608466	0.153439	0.0714286	0.138528	0.19943	0.133929	0.0769231	0.509524	0.113636	0.136512	0.0819048	0.028749	0.07961	0.104857	0.0677978	0.0358456	0.0444444	0.0724432	0.0791997	0.0999455	0.0985772	0.0250293	0.165297	0.072125
chr3:60430062	chr3	60430062	+	Intron	Mbnl1	ENSMUSG00000027763	0.25	0.666667	0.5	0.833333	1	0.722222	0.805556	0.666667	0.25	0.7	0.333333	0.455556	0.730519	0.760714	0.622222	0.922078	0.633333	0.944444	0.719048	0.685185	0.801587	0.894444	0.146561	0.611616	0.742648
chr3:87725373	chr3	87725373	+	Intron	Mrpl24,Rrnad1	ENSMUSG00000019710,ENSMUSG00000004896	0.261905	0.180097	0.120811	0.131779	0.211455	0.133824	0.161325	0.112434	0.138889	0.123252	0.150505	0.134454	0.0651515	0.0978836	0.05	0.0733586	0.0555556	0.0742706	0.134615	0.104762	0.0811966	0.103175	0.000424032	0.156934	0.0885838
chr3:87744085	chr3	87744085	+	UTR	-,Isg20l2	none,ENSMUSG00000048039	0.0401553	0.0327869	0.0588486	0.0294509	0.0153207	0.0173611	0.0348093	0.0687443	0.0318139	0.0268102	0.0255624	0.0504762	0.0687447	0.102908	0.117065	0.0972881	0.116028	0.0844786	0.0806964	0.0828551	0.135351	0.0812891	2.12357e-06	0.0346967	0.092471
chr3:88156113	chr3	88156113	+	Exon	Smg5	ENSMUSG00000001415	0.146819	0.138471	0.160185	0.156774	0.0737374	0.148883	0.094697	0.132025	0.204955	0.179815	0.165455	0.052549	0.0999025	0.150689	0.0660173	0.116823	0.0992063	0.0694861	0.105681	0.0573871	0.0612745	0.0830895	0.000605585	0.14562	0.0874641
chr3:88156567	chr3	88156567	+	Exon	Smg5	ENSMUSG00000001415	0.0111494	0.015175	0.0136621	0.0244955	0.00868709	0.0194407	0.0188221	0.0173894	0.0296363	0.0122029	0.00750318	0.00990545	0.0145157	0.0156832	0.0141386	0.0125896	0.0159014	0.0129959	0.0131742	0.0175828	0.0132369	0.013937	0.303717	0.0161967	0.0139692
chr3:88156569	chr3	88156569	+	Exon	Smg5	ENSMUSG00000001415	0.0227001	0.0341281	0.0288734	0.0351853	0.0154335	0.0297755	0.0374448	0.0313245	0.00757576	0.0251876	0.0375239	0.0134362	0.0199566	0.0274917	0.0283463	0.0208993	0.028402	0.0354339	0.0370447	0.0276024	0.0243094	0.0226807	0.618227	0.0277411	0.0259639
chr3:88156584	chr3	88156584	+	Exon	Smg5	ENSMUSG00000001415	0.00701981	0.0165922	0.0152948	0.0122689	0.012668	0.0133601	0.00980068	0.00848402	0.00492611	0.014166	0.0127289	0.0081982	0.012853	0.00868623	0.0116403	0.013628	0.00866074	0.0152225	0.0102828	0.00823487	0.0102645	0.00999626	0.507442	0.0115736	0.010697
chr3:88156594	chr3	88156594	+	Exon	Smg5	ENSMUSG00000001415	0.0131298	0.00981348	0.00538924	0.00916275	0.00821837	0.00853508	0.0115106	0.00877668	0.0145072	0.008924	0.00536899	0.000433463	0.00567592	0.00689626	0.00889949	0.00769635	0.00675188	0.00856543	0.00417466	0.00384255	0.0104428	0.00582639	0.0172064	0.0093942	0.00629138
chr3:88156598	chr3	88156598	+	Exon	Smg5	ENSMUSG00000001415	0.010443	0.00707743	0.0154986	0.0105819	0.00723788	0.0118826	0.0152444	0.00742298	0.0086872	0.0139808	0.0142199	0.00620975	0.0113208	0.0130413	0.0145559	0.0110116	0.0149849	0.0123774	0.00973102	0.0142654	0.0171392	0.0110651	0.369328	0.0111161	0.0123366
chr3:88491875	chr3	88491875	+	Exon	2810403A07Rik,Gm43714	ENSMUSG00000028060,ENSMUSG00000105512	0.0129707	0.0110584	0.00771885	0.0077302	0.00223714	0.00761057	0.0110979	0.00652265	0.00983746	0.00908559	0.0113365	0.00670002	0.0142687	0.0135984	0.0139058	0.0147696	0.0106331	0.00990157	0.0128479	0.0149657	0.0142292	0.012533	0.0046611	0.00883691	0.0125775
chr3:88829208	chr3	88829208	+	Intron	Ash1l	ENSMUSG00000028053	0.416667	0.916667	0.822222	0.916667	0.933333	0.5	0.857143	0.805556	0.9	0.6	0.7	0.666667	0.741013	0.798972	0.703704	0.85	0.741667	0.814286	0.739833	0.770833	0.833333	0.727778	0.9752	0.76075	0.762553
chr3:88829224	chr3	88829224	+	Intron	Ash1l	ENSMUSG00000028053	0.25	0.563492	0.655556	0.5	0.422222	0.133333	0.513889	0.555556	0.5	0.333333	0.277778	0.564103	0.445022	0.55202	0.529762	0.603507	0.387879	0.558303	0.314815	0.452778	0.489899	0.404762	0.335738	0.427742	0.482077
chr3:88829228	chr3	88829228	+	Intron	Ash1l	ENSMUSG00000028053	0.25	0.5	0.47619	0.472222	0.361111	0.0666667	0.458333	0.464286	0.291667	0.333333	0.111111	0.507937	0.4	0.384615	0.361111	0.462185	0.320635	0.505128	0.201786	0.261634	0.277778	0.282051	0.769502	0.344084	0.360442
chr3:88829240	chr3	88829240	+	Intron	Ash1l	ENSMUSG00000028053	0.0666667	0.333333	0.177778	0.259259	0.194444	0.0666667	0.373016	0.447619	0.266667	0.25	0.111111	0.376068	0.030303	0.237037	0.0703704	0.210979	0.132867	0.216667	0.121693	0.0833333	0.0545809	0.134894	0.112987	0.231506	0.151708
chr3:89864630	chr3	89864630	+	UTR	4933434E20Rik,Gm16540	ENSMUSG00000027942,ENSMUSG00000090005	0.020757	0.0347407	0.0414938	0.0418197	0.0382084	0.0157715	0.0247549	0.00997426	0.0454545	0.00716846	0.0184383	0.0184499	0.0377371	0.00501253	0.0245098	0.0225466	0.0311902	0.0168005	0.0355703	0.0229417	0.0240643	0.020353	0.479151	0.0271438	0.0235614
chr3:89864635	chr3	89864635	+	UTR	4933434E20Rik,Gm16540	ENSMUSG00000027942,ENSMUSG00000090005	0.0238377	0.0101987	0.00617284	0.0261113	0.0313725	0.0107554	0.00847953	0.014283	0.00704225	0.02146	0.0137566	0.0115942	0.0178281	0.00909035	0.0224191	0.0172915	0.0274228	0.0168183	0.0228655	0.0261894	0.0191585	0.0184706	0.304837	0.01577	0.0190135
chr3:90409078	chr3	90409078	+	Intron	Gm42674,S100a3,S100a4,S100a5	ENSMUSG00000105518,ENSMUSG00000001021,ENSMUSG00000001020,ENSMUSG00000001023	0.000783857	0.001277	0.000789411	0.00112602	0.000963426	0.000828585	0.00086077	0.000949897	0.000855627	0.000949071	0.00115313	0.000328407	0.000850557	0.000674411	0.00051511	0.000353959	0.00110503	0.000484033	0.000472316	0.00194282	0.000589971	0.000349406	0.100149	0.000957891	0.00069691
chr4:124621545	chr4	124621545	+	Exon	9930104L06Rik,Cdca8	ENSMUSG00000044730,ENSMUSG00000028873	0.113095	0.0814394	0.230812	0.182234	0.0833333	0.130719	0.160256	0.0138889	0.105556	0.196429	0.11859	0.37037	0.0833333	0.0416667	0.107143	0.0277778	0.030303	0.0606061	0.0238095	0.0333333	0.0151515	0.135185	0.231076	0.128759	0.0844254
chr4:125734533	chr4	125734533	+	intergenic	-,Mrps15,Oscp1	none,ENSMUSG00000028861,ENSMUSG00000042616	0.333333	0.166667	0.222222	0.583333	0.388889	0.222222	0.677778	0.333333	0.75	0.4	0.388889	0.111111	0.111111	0.111111	0.166667	0.416667	0.130952	0.216667	0.037037	0.166667	0.277778	0.333333	0.00389014	0.406061	0.189009
chr4:128875867	chr4	128875867	+	Intron	Yars	ENSMUSG00000028811	0.252646	0.0277778	0.12037	0.0892857	0.108333	0.150794	0.114286	0.108333	0.245455	0.0925926	0.191667	0.0333333	0.0266458	0.0303644	0.158201	0.0274194	0.109307	0.0488889	0.131335	0.0423387	0.0319444	0.0726335	0.00957975	0.136504	0.0647647
chr4:129285007	chr4	129285007	+	UTR	Dcdc2b,Tmem234	ENSMUSG00000078552,ENSMUSG00000028797	0.0263923	0.0327075	0.0323344	0.0323016	0.0397324	0.0326099	0.0259602	0.0390859	0.0307339	0.0345631	0.0370176	0.013918	0.0108799	0.016182	0.0126196	0.0162018	0.0149641	0.014333	0.0149443	0.0201333	0.0118942	0.0144099	1.4543e-10	0.0330399	0.0145891
chr4:129285029	chr4	129285029	+	UTR	Dcdc2b,Tmem234	ENSMUSG00000078552,ENSMUSG00000028797	0.0249029	0.0326524	0.0302067	0.0237296	0.0286961	0.0216213	0.0266385	0.0229891	0.0417203	0.0246089	0.0377	0.0195024	0.0323252	0.0333103	0.0363995	0.0339322	0.0404761	0.0344898	0.0335195	0.0454065	0.035439	0.0364586	0.0389907	0.0286787	0.0346599
chr4:137864247	chr4	137864247	+	Intron	Ddost	ENSMUSG00000028757	0.999445	0.996598	0.996136	0.998181	0.999438	0.996743	0.998565	0.998277	1	0.997943	0.999337	0.666667	0.958222	0.960463	0.973487	0.991453	0.960865	0.962354	0.981806	0.957225	0.986667	0.972166	0.0606144	0.998242	0.942852
chr4:140507433	chr4	140507433	+	UTR	Gm13031,Padi2	ENSMUSG00000087698,ENSMUSG00000028927	0.023665	0.00724922	0.0165654	0.00679213	0.0322889	0.0139573	0.0195979	0.0242712	0.0423316	0.0149941	0.0106762	0.0171801	0.0308639	0.035646	0.0280409	0.0287509	0.0311164	0.036731	0.025366	0.0549672	0.0341365	0.0331387	0.00653326	0.0193081	0.032358
chr4:140507493	chr4	140507493	+	UTR	Gm13031,Padi2	ENSMUSG00000087698,ENSMUSG00000028927	0.00741385	0.0239859	0.0118767	0.0142071	0.00469484	0.00757576	0.00738658	0.0138739	0.0109489	0.0107979	0.0154645	0.00710751	0.0105683	0.00525746	0.0101255	0.0159631	0.0130769	0.0124975	0.00831901	0.0157643	0.00904208	0.00986218	0.615169	0.0116569	0.0106894
chr4:140507497	chr4	140507497	+	UTR	Gm13031,Padi2	ENSMUSG00000087698,ENSMUSG00000028927	0.033664	0.0381726	0.066046	0.0283224	0.160672	0.017094	0.0204795	0.0192308	0.0326087	0.0315612	0.0349393	0.0232009	0.0331802	0.0721565	0.0466394	0.0499911	0.0457994	0.0298611	0.0386331	0.0285438	0.0363499	0.0314169	0.745815	0.0438901	0.0396157
chr4:140781926	chr4	140781926	+	Exon	Rsg1	ENSMUSG00000073733	0.0185185	0.0265301	0.0212121	0.0437908	0.0274943	0.0070922	0.0195231	0.00584795	0.0222222	0.0197531	0.015873	0.00529101	0.0143875	0.0499241	0.0219456	0.0154971	0.0353855	0.0234565	0.0105263	0.0201802	0.0358562	0.0284043	0.553715	0.0207143	0.023714
chr4:154995574	chr4	154995574	+	UTR	Cdk11b,Gm10563,Gm16023,Gm16024,Slc35e2	ENSMUSG00000029062,ENSMUSG00000073682,ENSMUSG00000086682,ENSMUSG00000085063,ENSMUSG00000042202	0.00989609	0.0250558	0.0176881	0.0164105	0.0125041	0.00792222	0.00995466	0.0105909	0.0102141	0.00967935	0.0251225	0.00847345	0.0126951	0.0118611	0.0125962	0.0213858	0.0157843	0.0144802	0.0213197	0.0108961	0.0153684	0.0146432	0.856709	0.0140944	0.0145003
chr4:154995579	chr4	154995579	+	UTR	Cdk11b,Gm10563,Gm16023,Gm16024,Slc35e2	ENSMUSG00000029062,ENSMUSG00000073682,ENSMUSG00000086682,ENSMUSG00000085063,ENSMUSG00000042202	0.011453	0.0271003	0.0151254	0.0200751	0.0114811	0.0127444	0.0125455	0.0126713	0.0198825	0.0119011	0.0284408	0.0147832	0.0143981	0.017045	0.0095585	0.021891	0.0141558	0.0167464	0.0250392	0.0110763	0.0159728	0.0138742	0.731595	0.0166746	0.0158673
chr4:154995596	chr4	154995596	+	UTR	Cdk11b,Gm10563,Gm16023,Gm16024,Slc35e2	ENSMUSG00000029062,ENSMUSG00000073682,ENSMUSG00000086682,ENSMUSG00000085063,ENSMUSG00000042202	0.0125866	0.0220987	0.0163629	0.016257	0.0154513	0.0304953	0.0211122	0.0192462	0.00285714	0.0171586	0.0193336	0.0135042	0.0169218	0.0191116	0.0189674	0.0216222	0.0156746	0.0189634	0.0235919	0.0147138	0.0212346	0.0176794	0.717376	0.0175418	0.0183622
chr4:154995599	chr4	154995599	+	UTR	Cdk11b,Gm10563,Gm16023,Gm16024,Slc35e2	ENSMUSG00000029062,ENSMUSG00000073682,ENSMUSG00000086682,ENSMUSG00000085063,ENSMUSG00000042202	0.0130097	0.0119064	0.0161175	0.0167238	0.00895547	0.0184069	0.0124066	0.0119366	0.0148844	0.0088211	0.0247655	0.00947895	0.0188436	0.0161392	0.0181417	0.0115724	0.0122255	0.01544	0.0123592	0.0105975	0.0141951	0.0119324	0.70626	0.0143576	0.0137205
chr4:154995622	chr4	154995622	+	UTR	Cdk11b,Gm10563,Gm16023,Gm16024,Slc35e2	ENSMUSG00000029062,ENSMUSG00000073682,ENSMUSG00000086682,ENSMUSG00000085063,ENSMUSG00000042202	0.0493833	0.0319365	0.0471383	0.0373482	0.0535642	0.0478038	0.0441279	0.0584979	0.0515942	0.0748006	0.0555273	0.0196757	0.0492327	0.0408782	0.0497177	0.0390052	0.0459148	0.0463544	0.0525806	0.0493345	0.0589873	0.0407871	0.25193	0.0501566	0.0447698
chr4:154995635	chr4	154995635	+	UTR	Cdk11b,Gm10563,Gm16023,Gm16024,Slc35e2	ENSMUSG00000029062,ENSMUSG00000073682,ENSMUSG00000086682,ENSMUSG00000085063,ENSMUSG00000042202	0.00901812	0.00329722	0.00618234	0.00674361	0.00744048	0.0101343	0.012782	0.00976508	0.00242718	0.00828783	0.00696365	0.0010929	0.00686927	0.00714211	0.00320551	0.00299292	0.00493979	0.00715414	0.00489491	0.0155106	0.00553568	0.00294335	0.210673	0.00754926	0.00566192
chr4:154996426	chr4	154996426	+	UTR	Cdk11b,Gm10563,Gm16023,Slc35e2	ENSMUSG00000029062,ENSMUSG00000073682,ENSMUSG00000086682,ENSMUSG00000042202	0.03243	0.0191947	0.0225854	0.0209249	0.0137388	0.0594238	0.021594	0.0202169	0.0294407	0.0235068	0.0199857	0.0144632	0.0157428	0.0249587	0.0166127	0.0205448	0.0275025	0.0171202	0.0204142	0.0237503	0.0251598	0.021676	0.215474	0.0257311	0.0207223
chr4:154996431	chr4	154996431	+	UTR	Cdk11b,Gm10563,Gm16023,Slc35e2	ENSMUSG00000029062,ENSMUSG00000073682,ENSMUSG00000086682,ENSMUSG00000042202	0.0265779	0.011766	0.028268	0.0290288	0.0158558	0.0523865	0.0216214	0.0338997	0.0274805	0.0168082	0.0203739	0.0134103	0.0198687	0.0230588	0.0173412	0.0202868	0.0215047	0.0185809	0.0179645	0.0262608	0.0242912	0.0239012	0.151101	0.0258242	0.0205881
chr4:154996448	chr4	154996448	+	UTR	Cdk11b,Gm10563,Gm16023,Slc35e2	ENSMUSG00000029062,ENSMUSG00000073682,ENSMUSG00000086682,ENSMUSG00000042202	0.0171776	0.00423515	0.0240162	0.0209986	0.0129074	0.0186415	0.0100712	0.0128756	0.0258886	0.00689655	0.0130388	0.00674073	0.0192451	0.0204062	0.0197572	0.0183853	0.0228696	0.0219623	0.022288	0.0228989	0.0228872	0.0211316	0.0739165	0.0151588	0.0198702
chr4:154996480	chr4	154996480	+	UTR	Cdk11b,Gm10563,Gm16023,Slc35e2	ENSMUSG00000029062,ENSMUSG00000073682,ENSMUSG00000086682,ENSMUSG00000042202	0.0965562	0.122835	0.14143	0.102263	0.101109	0.116605	0.0640831	0.0933007	0.0294118	0.0983267	0.132304	0.177419	0.301587	0.200709	0.272358	0.286575	0.163805	0.262963	0.318669	0.229425	0.221463	0.212476	1.80632e-07	0.0998386	0.240677
chr4:155180406	chr4	155180406	+	Intron	Mrpl20	ENSMUSG00000029066	0.182828	0.203704	0.530556	0.179894	0.277778	0.388889	0.177778	0.344872	0.305556	0.262037	0.283333	0.150794	0.122222	0.228846	0.230952	0.339115	0.211601	0.113636	0.234386	0.251282	0.274074	0.352964	0.169865	0.285202	0.22817
chr4:8534651	chr4	8534651	+	UTR	Rab2a	ENSMUSG00000047187	0.0329026	0.0232418	0.0310563	0.0289146	0.0373765	0.0428931	0.0265123	0.0232704	0.0260672	0.0293631	0.0332729	0.025641	0.039623	0.037037	0.025641	0.0263158	0.0599473	0.0498188	0.0525253	0.0567595	0.0546848	0.0353261	0.0143786	0.0304428	0.04212
chr5:110558744	chr5	110558744	+	UTR	Zfp605	ENSMUSG00000023284	0.318512	0.315502	0.302564	0.369401	0.339316	0.403651	0.339286	0.349275	0.334567	0.24807	0.377258	0.195161	0.26748	0.288446	0.376749	0.315076	0.346234	0.347842	0.364518	0.325157	0.345641	0.412541	0.643206	0.336127	0.325895
chr5:125937620	chr5	125937620	+	UTR	-,Bri3bp	none,ENSMUSG00000037905	0.0267714	0.03042	0.0256356	0.0266193	0.0220525	0.0312092	0.0261048	0.0274697	0.0218571	0.0259756	0.0233777	0.0279229	0.0408344	0.03291	0.0335646	0.0394915	0.0387899	0.0418372	0.0389791	0.0522314	0.0421425	0.0383545	5.78286e-06	0.0261357	0.0388235
chr5:144008300	chr5	144008300	+	UTR	Zfp12,Zfp316	ENSMUSG00000029587,ENSMUSG00000046658	0.00881495	0.00764904	0.00794645	0.0108921	0.0053541	0.00723114	0.00503531	0.00985747	0.0125367	0.00585567	0.00777328	0.00573595	0.00783322	0.011197	0.00983595	0.011723	0.00908359	0.00940272	0.0106142	0.00917773	0.00953896	0.011292	0.101137	0.00808602	0.00958493
chr5:144008333	chr5	144008333	+	UTR	Zfp12,Zfp316	ENSMUSG00000029587,ENSMUSG00000046658	0.0178276	0.0202816	0.023367	0.0177234	0.0206533	0.0197442	0.0138496	0.0205962	0.0136849	0.0156081	0.014861	0.0139395	0.0245947	0.0242273	0.0244092	0.021012	0.0257942	0.0253905	0.0202815	0.0212838	0.0219958	0.017045	0.0180872	0.0180179	0.0218158
chr5:23666922	chr5	23666922	+	intergenic	Klhl7,Nupl2	ENSMUSG00000028986,ENSMUSG00000048439	0.0117481	0.0139527	0.0183313	0.0103662	0.0139537	0.0152253	0.0219983	0.00953413	0.0218767	0.0359875	0.0217694	0.00773047	0.0220094	0.0252117	0.0201536	0.0146343	0.0185991	0.0218025	0.0186373	0.0218744	0.0204146	0.0144799	0.721214	0.0177039	0.0186861
chr5:23666928	chr5	23666928	+	intergenic	Klhl7,Nupl2	ENSMUSG00000028986,ENSMUSG00000048439	0.015481	0.0114158	0.0099273	0.0114052	0.00669965	0.0131805	0.0110827	0.0100587	0.0110632	0.00781638	0.00580745	0.0109171	0.0102894	0.0211768	0.0142482	0.0124992	0.0183513	0.0153452	0.010527	0.0163002	0.0149186	0.0179962	0.00401436	0.010358	0.014779
chr5:23666943	chr5	23666943	+	intergenic	Klhl7,Nupl2	ENSMUSG00000028986,ENSMUSG00000048439	0.0242053	0.0412983	0.0258291	0.0176061	0.0173398	0.0209677	0.0250277	0.0234827	0.0208683	0.022878	0.0105339	0.000960615	0.0199268	0.019474	0.0218734	0.0163967	0.015312	0.0191682	0.0224636	0.0292659	0.0196555	0.0156792	0.157886	0.0227306	0.0181978
chr5:32924858	chr5	32924858	+	Intron	Gm15614,Yes1	ENSMUSG00000085234,ENSMUSG00000014932	0.244444	0.333333	0.444444	0.2	0.333333	0.833333	0.111111	0.277778	0.5	0.111111	0.666667	0.416667	0.301587	0.444444	0.359307	0.288095	0.392552	0.341667	0.396825	0.318182	0.253704	0.631944	0.914894	0.368687	0.376816
chr5:45913747	chr5	45913747	+	Intron	Med28	ENSMUSG00000015804	0.989594	0.995581	0.990173	0.989825	0.98613	0.980086	0.98403	0.982774	0.994804	0.994204	0.980247	0.560777	0.814815	0.829091	0.835986	0.787232	0.759892	0.879933	0.855499	0.792918	0.806524	0.836709	3.3199e-07	0.98795	0.796307
chr5:53992102	chr5	53992102	+	Intron	-,Rbpj	none,ENSMUSG00000039191	0.00172712	0.00455646	0.00582242	0.00118203	0.00130719	0.0015015	0.00212314	0.00237248	0.00297619	0.00672308	0.00387014	0.00471098	0.00666153	0.00641873	0.0021575	0.00754817	0.00624007	0.00553151	0.00511367	0.0146012	0.00982049	0.00860837	0.00234187	0.00310561	0.00703747
chr5:53992115	chr5	53992115	+	Intron	-,Rbpj	none,ENSMUSG00000039191	0.0629423	0.0672292	0.0602612	0.0896302	0.0644129	0.0612176	0.0464439	0.0776252	0.064446	0.0514906	0.0550827	0.0250095	0.036759	0.0438143	0.0484959	0.0330631	0.0396251	0.0448472	0.04184	0.0378718	0.0346232	0.039944	5.52752e-06	0.0637074	0.0387176
chr6:66490645	chr6	66490645	+	UTR	Mad2l1	ENSMUSG00000029910	0.0425804	0.0308456	0.0506147	0.0663272	0.0501263	0.0401249	0.049157	0.0447903	0.047943	0.0372615	0.0406311	0.0254804	0.0111111	0.0324433	0.0274194	0.038235	0.0302003	0.0264199	0.0352381	0.00584795	0.0272904	0.0183003	7.45293e-05	0.0454911	0.0252715
chr7:134670018	chr7	134670018	+	Exon	Gm42715,Snora30,Srcap	ENSMUSG00000107023,ENSMUSG00000065259,ENSMUSG00000053877	0.205882	0.195238	0.213716	0.0588235	0.0333333	0.037037	0.00980392	0.166667	0.125	0.0925926	0.0714286	0.0595238	0.135632	0.11828	0.125953	0.0993796	0.290172	0.0596491	0.173927	0.25947	0.399547	0.166332	0.128753	0.109957	0.171624
chr7:134722682	chr7	134722682	+	Exon	Ccdc189,Phkg2	ENSMUSG00000057176,ENSMUSG00000030815	0.0176629	0.0220731	0.0188741	0.0253081	0.0190974	0.0199902	0.0254313	0.0213062	0.0177063	0.0212985	0.0226919	0.00709742	0.0147308	0.0139036	0.0179156	0.0176849	0.0127507	0.0173519	0.0128792	0.0162445	0.0150932	0.0144778	3.87794e-05	0.02104	0.0145572
chr7:134722683	chr7	134722683	+	Exon	Ccdc189,Phkg2	ENSMUSG00000057176,ENSMUSG00000030815	0.0053711	0.00987444	0.00612651	0.00517455	0.00382513	0.00423392	0.00633533	0.00752452	0.00414148	0.00708535	0.00310002	0.00340699	0.00584483	0.00692301	0.00531151	0.00607004	0.00613761	0.00622554	0.00888046	0.00728598	0.00562378	0.00885881	0.361432	0.0057084	0.00641532
chr7:134722708	chr7	134722708	+	Exon	Ccdc189,Phkg2	ENSMUSG00000057176,ENSMUSG00000030815	0.0144511	0.0216285	0.0194921	0.0219245	0.0191733	0.0227347	0.0138994	0.0199425	0.0177176	0.0197124	0.0192962	0.0161133	0.0211792	0.0243713	0.0247211	0.0188974	0.0217288	0.0231652	0.0223345	0.0231335	0.0224138	0.0231689	0.021089	0.0190884	0.0219297
chr7:134722732	chr7	134722732	+	Exon	Ccdc189,Phkg2	ENSMUSG00000057176,ENSMUSG00000030815	0.011048	0.0136897	0.0200204	0.0269515	0.0286779	0.024761	0.0134827	0.00472111	0.022019	0.0320353	0.0217241	0.0172682	0.0247092	0.0209771	0.0184188	0.0284134	0.0238627	0.0324704	0.0283194	0.0177927	0.0277931	0.0245286	0.173846	0.019921	0.0240503
chr7:134722745	chr7	134722745	+	Exon	Ccdc189,Phkg2	ENSMUSG00000057176,ENSMUSG00000030815	0.115801	0.104857	0.120652	0.0608607	0.0700483	0.0839198	0.0742369	0.0837281	0.0357143	0.0266667	0.0344828	0.0466667	0.0694689	0.0514898	0.0894486	0.0847099	0.0707797	0.0980593	0.0770156	0.0947814	0.0844093	0.0934343	0.689831	0.0737243	0.0782058
chr7:19874499	chr7	19874499	+	Intron	Rtn2	ENSMUSG00000030401	0.00451865	0.00715107	0.0026455	0.00548943	0.00866266	0.00616199	0.008712	0.00290784	0.0105263	0.00505993	0.00716531	0.00221018	0.00695967	0.00672809	0.00503299	0.00530906	0.00660128	0.00326243	0.00458402	0.00330849	0.00787081	0.00419997	0.215809	0.00627279	0.005097
chr7:25355613	chr7	25355613	+	Intron	Xrcc1	ENSMUSG00000051768	0.873965	0.852513	0.857794	0.845264	0.921276	0.835097	0.86489	0.786698	0.85	0.84623	0.913098	0.444444	0.591631	0.596032	0.577778	0.539683	0.611111	0.434343	0.523148	0.380952	0.722222	0.50887	1.87418e-09	0.858802	0.53911
chr7:52333676	chr7	52333676	+	UTR	Nosip,Rcn3	ENSMUSG00000003421,ENSMUSG00000019539	0.0133962	0.0104645	0.0233147	0.0218294	0.010001	0.0345295	0.0133433	0.0145947	0.0324807	0.0069808	0.0173745	0.00658888	0.0137211	0.0220315	0.0230772	0.0165808	0.0219466	0.0154035	0.025717	0.0197293	0.0219022	0.0168825	0.88181	0.0180281	0.0185073
chr8:109435787	chr8	109435787	+	Intron	Utp4	ENSMUSG00000041438	0.166667	0.166667	0.218254	0.0151515	0.177778	0.0740741	0.108333	0.0430556	0.0909091	0.0833333	0.155952	0.111111	0.047619	0.05	0.0166667	0.0515873	0.0625	0.0537037	0.0693713	0.0527778	0.031746	0.0229885	0.00417803	0.118198	0.0518247
chr8:3643466	chr8	3643466	+	UTR	Stxbp2	ENSMUSG00000004626	0.0111051	0.00966211	0.00976796	0.0138946	0.00917547	0.0140917	0.0127658	0.0105156	0.0129764	0.0111545	0.0154539	0.0129408	0.0188294	0.0142485	0.018291	0.0179682	0.0133457	0.0226277	0.0216652	0.0146443	0.0184169	0.0175986	0.000131019	0.0118694	0.0173251
chr8:71429193	chr8	71429193	+	UTR	Lpl	ENSMUSG00000015568	0.163636	0.181373	0.119841	0.149892	0.155556	0.142857	0.116162	0.0626781	0.111111	0.215488	0.142063	0.166084	0.125397	0.146551	0.151515	0.163029	0.187386	0.141826	0.151753	0.121902	0.133499	0.138277	0.656318	0.141878	0.147929
chr8:71429212	chr8	71429212	+	UTR	Lpl	ENSMUSG00000015568	0.111111	0.175961	0.110119	0.105556	0.173993	0.11329	0.108225	0.0537037	0.111111	0.236111	0.154167	0.162088	0.0993281	0.10937	0.141397	0.132468	0.163526	0.137501	0.154677	0.0900107	0.129542	0.119673	0.940486	0.132122	0.130871
chr8:72342755	chr8	72342755	+	Exon	Gmip,Lpar2	ENSMUSG00000036246,ENSMUSG00000031861	0.055691	0.0471048	0.0678681	0.0518247	0.0550576	0.0568757	0.0421142	0.0532308	0.0499378	0.0393306	0.0501778	0.0388839	0.0745653	0.0452923	0.0380671	0.0748728	0.0413576	0.0544044	0.0665678	0.0618386	0.0712529	0.0823922	0.191713	0.0517466	0.059045
chr8:72342766	chr8	72342766	+	UTR	Gmip,Lpar2	ENSMUSG00000036246,ENSMUSG00000031861	0.0228959	0.0311027	0.0186953	0.0225848	0.0239339	0.0256467	0.0220163	0.016603	0.0234038	0.011167	0.0234179	0.00777819	0.0231083	0.0284185	0.0287271	0.0283564	0.0238246	0.0247518	0.0218744	0.0278807	0.0261501	0.0300052	0.28222	0.0219516	0.024625
chr8:72342784	chr8	72342784	+	UTR	Gmip,Lpar2	ENSMUSG00000036246,ENSMUSG00000031861	0.0222854	0.0166192	0.00350877	0.0037037	0.00497512	0.0185118	0.00666667	0.0182766	0.01261	0.00953501	0.00935605	0.00330033	0.00277778	0.00995033	0.00831077	0.00953554	0.0132989	0.00592049	0.00839617	0.0136184	0.0136463	0.0202952	0.547174	0.0114589	0.00991366
chr8:72342790	chr8	72342790	+	UTR	Gmip,Lpar2	ENSMUSG00000036246,ENSMUSG00000031861	0.124971	0.0618588	0.0770723	0.0732283	0.0767396	0.100974	0.0691908	0.0967395	0.0805556	0.0509614	0.0606397	0.0397911	0.0650493	0.0519381	0.0589863	0.0607749	0.0837775	0.0647154	0.0627777	0.0709753	0.0673745	0.0778579	0.0486036	0.0793574	0.0640016
chr8:72590958	chr8	72590958	+	Intron	Sugp1	ENSMUSG00000011306	0.444444	0.333333	0.472222	0.288889	0.722222	0.75	0.65	0.688889	1	0.388889	0.6	0.555556	0.388889	0.52381	0.833333	0.383333	0.833333	0.611111	0.383333	0.194444	0.75	0.722222	0.873934	0.576263	0.56176
chr8:74016965	chr8	74016965	+	UTR	Gtpbp3,Plvap	ENSMUSG00000007610,ENSMUSG00000034845	0.0170651	0.0210188	0.0211452	0.0197752	0.0237242	0.016593	0.0295833	0.0172981	0.0127551	0.0136438	0.00890579	0.0383948	0.0620133	0.0524286	0.0615826	0.059421	0.0369914	0.0472295	0.0536308	0.0365519	0.049821	0.0346818	5.23953e-08	0.0183189	0.0484315
chr8:74440097	chr8	74440097	+	UTR	Ccnb2-ps,Zfp617,Zfp882	ENSMUSG00000083718,ENSMUSG00000066880,ENSMUSG00000089857	0.0376541	0.0677266	0.0597498	0.0473856	0.0332149	0.071863	0.0502355	0.0587921	0.0459643	0.0566826	0.0536534	0.046129	0.0640864	0.056905	0.0621109	0.0677234	0.0710399	0.0542417	0.0520562	0.0644775	0.0552783	0.0743421	0.092276	0.0529929	0.0607628
chr8:74775772	chr8	74775772	+	Intron	Ap1m1	ENSMUSG00000003033	0.910179	0.93066	0.940803	0.935097	0.950028	0.922313	0.93703	0.924	0.958372	0.950904	0.958423	0.504274	0.75626	0.720202	0.605769	0.794643	0.695833	0.745874	0.806383	0.774573	0.683041	0.703704	4.66589e-08	0.937983	0.708232
chr8:87390658	chr8	87390658	+	Exon	Farsa,Mir7069	ENSMUSG00000003808,ENSMUSG00000098331	0.00262467	0.00617284	0.008	0.0068551	0.0227688	0.00578035	0.0156518	0.0017094	0.00729927	0.0183143	0.0139273	0.00709529	0.0113514	0.00993961	0.0216968	0.0145915	0.0261499	0.0110074	0.00990344	0.0206826	0.0174429	0.0181625	0.0633074	0.00991854	0.0152748
chr8:87435062	chr8	87435062	+	UTR	Dnase2a,Mast1	ENSMUSG00000003812,ENSMUSG00000053693	0.0343137	0.0188679	0.0103664	0.024811	0.0130719	0.0115366	0.0363054	0.043899	0.0210893	0.0336649	0.0153439	0.00952381	0.0205161	0.0190289	0.0279537	0.0609676	0.0387951	0.0420211	0.0293265	0.024184	0.0218104	0.0339365	0.291354	0.0239336	0.029824
chr8:87435079	chr8	87435079	+	UTR	Dnase2a,Mast1	ENSMUSG00000003812,ENSMUSG00000053693	0.0224038	0.0301016	0.0199061	0.0243359	0.02801	0.0110434	0.0329776	0.0243864	0.0366077	0.0281877	0.0275495	0.02377	0.0286768	0.0350091	0.0282666	0.0293165	0.0327583	0.0314997	0.0377929	0.0326206	0.0415598	0.0316639	0.0249696	0.0259554	0.0320849
chr8:87435096	chr8	87435096	+	UTR	Dnase2a,Mast1	ENSMUSG00000003812,ENSMUSG00000053693	0.0167953	0.0397652	0.0295107	0.021369	0.0284869	0.0373321	0.0167653	0.024817	0.0147991	0.0192298	0.0219922	0.020636	0.0307532	0.0361692	0.0306929	0.0337154	0.0301637	0.0249782	0.037171	0.0256484	0.0249147	0.027945	0.125255	0.0246239	0.0293443
chr8:87435097	chr8	87435097	+	UTR	Dnase2a,Mast1	ENSMUSG00000003812,ENSMUSG00000053693	0.010592	0.00388184	0.00610514	0.00758986	0.00650232	0.0149466	0.00460221	0.0158195	0.00902527	0.0112297	0.00780882	0.00502904	0.00955128	0.00637061	0.00438833	0.00487462	0.0065085	0.0108308	0.00826187	0.0128659	0.00807949	0.00688867	0.367147	0.00891847	0.00760447
chr8:87435108	chr8	87435108	+	UTR	Dnase2a,Mast1	ENSMUSG00000003812,ENSMUSG00000053693	0.0149605	0.00880928	0.0230986	0.017967	0.017662	0.024205	0.0164862	0.0215274	0.0131871	0.0238382	0.0187013	0.0139511	0.0190877	0.0186771	0.0233496	0.0145689	0.0175274	0.015134	0.0155895	0.0187907	0.0173543	0.0168326	0.604171	0.0182221	0.0173512
chr8:87435113	chr8	87435113	+	UTR	Dnase2a,Mast1	ENSMUSG00000003812,ENSMUSG00000053693	0.0111028	0.00697409	0.0290748	0.0104335	0.0141732	0.013019	0.0102205	0.0197772	0.00877193	0.0190478	0.01607	0.00949422	0.0110158	0.0139197	0.0144148	0.0159713	0.0135385	0.0122903	0.0202619	0.019062	0.0165774	0.0122202	0.996637	0.0144241	0.0144333
chr8:87435130	chr8	87435130	+	UTR	Dnase2a,Mast1	ENSMUSG00000003812,ENSMUSG00000053693	0.0187606	0.0130496	0.0197138	0.0181093	0.0336564	0.0365336	0.0276802	0.0456646	0.0352183	0.0198634	0.0327373	0.0203157	0.0303556	0.0363131	0.027684	0.0330069	0.026422	0.0345562	0.0268216	0.0278233	0.0366268	0.0388603	0.336724	0.0273625	0.0307987
chr9:103237985	chr9	103237985	+	Exon	Topbp1	ENSMUSG00000032555	0.00212536	0.00169779	0.00187512	0.000968992	0.00493884	0.00341901	0.000544662	0.00244697	0.000667557	0.00200803	0.00403459	0.0021425	0.00457989	0.00431894	0.0018438	0.00501522	0.00280995	0.00317028	0.0043867	0.00302756	0.00739498	0.00464045	0.0146364	0.0022479	0.00393911
chr9:107935594	chr9	107935594	+	UTR	Gm20662,Ip6k1	ENSMUSG00000093456,ENSMUSG00000032594	0.00333333	0.0138117	0.00193798	0.0015873	0.00200803	0.010582	0.00484419	0.00606061	0.00680473	0.00722496	0.00744048	0.00195752	0.00376818	0.000609385	0.00137042	0.00328019	0.00269139	0.000585823	0.00367254	0.00343177	0.00716888	0.00342427	0.0269031	0.00596685	0.00290549
chr9:110057924	chr9	110057924	+	Intron	Smarcc1	ENSMUSG00000032481	0.0833333	0.177778	0.278388	0.166667	0.166667	0.269841	0.0666667	0.4	0.2	0.0666667	0.166667	0.166667	0.0939394	0.135417	0.354978	0.136032	0.122727	0.0740741	0.159823	0.132576	0.0933063	0.152778	0.324859	0.185698	0.147483
chr9:123503844	chr9	123503844	+	UTR	Sacm1l,Slc6a20b	ENSMUSG00000025240,ENSMUSG00000025243	0.00952381	0.0227627	0.00160256	0.0147985	0.00748223	0.0210694	0.0112593	0.0141569	0.0285039	0.00258398	0.0106183	0.0138881	0.0243482	0.0272931	0.0150428	0.0212723	0.00725368	0.0151632	0.016861	0.0194038	0.00585806	0.0110572	0.361752	0.0131238	0.016131
chr9:20823950	chr9	20823950	+	Intron	Icam1	ENSMUSG00000037405	0.00275482	0.00346408	0.00129702	0.00432917	0.00122549	0.00111111	0.00230681	0.00118624	0.00221239	0.00275482	0.00149477	0.00174599	0.00403287	0.00321704	0.00120793	0.00338868	0.00411358	0.00301935	0.00332964	0.00202726	0.00137741	0.00467281	0.142533	0.00219425	0.00292114
chr9:20823953	chr9	20823953	+	Intron	Icam1	ENSMUSG00000037405	0.00526398	0.0105409	0.00618174	0.00961916	0.0144083	0.0126959	0.00236407	0.00624229	0.00806452	0.00824074	0.00814722	0.00630452	0.00599715	0.00457541	0.00699529	0.00771798	0.00488393	0.00762215	0.0100655	0.00995701	0.00885084	0.00456918	0.291522	0.00834262	0.007049
chr9:20823954	chr9	20823954	+	Intron	Icam1	ENSMUSG00000037405	0.0303434	0.0162381	0.0369825	0.0199686	0.0272111	0.0375373	0.0303848	0.0283803	0.0240077	0.0338429	0.0329678	0.02794	0.0338992	0.0426083	0.0362026	0.0403765	0.0393459	0.0368915	0.04035	0.0403809	0.0308413	0.0351711	0.00443107	0.0288968	0.0367279
chr9:20823964	chr9	20823964	+	Intron	Icam1	ENSMUSG00000037405	0.0189762	0.0208761	0.0256186	0.0161695	0.0136533	0.0274285	0.0183404	0.0229561	0.0397647	0.0273739	0.0233766	0.0124009	0.01604	0.0210528	0.0177362	0.0222469	0.0117417	0.0259431	0.0137128	0.0262934	0.0209234	0.0256846	0.184666	0.0231395	0.0194342
chr9:20823969	chr9	20823969	+	Intron	Icam1	ENSMUSG00000037405	0.00411523	0.00716846	0.0334419	0.016074	0.00715001	0.0276362	0.0153645	0.0176471	0.0214286	0.0115268	0.00958776	0.00902379	0.0127814	0.0127377	0.0174792	0.022582	0.0126289	0.0200991	0.00984044	0.0192343	0.0110178	0.021014	0.937877	0.0155582	0.0153126
chr9:20823973	chr9	20823973	+	Intron	Icam1	ENSMUSG00000037405	0.00421941	0.0147929	0.0366681	0.020417	0.00520833	0.0383606	0.0243791	0.0228744	0.0234375	0.017094	0.0107527	0.00711888	0.021001	0.0174575	0.0217008	0.0231938	0.0160392	0.0162971	0.0175601	0.0216693	0.00966267	0.0229816	0.572173	0.0198367	0.0176984
chr9:20823983	chr9	20823983	+	Intron	Icam1	ENSMUSG00000037405	0.0111887	0.0208302	0.0447044	0.0339716	0.0115215	0.0338361	0.0400481	0.0330898	0.0163934	0.0195579	0.0143369	0.0119641	0.0160996	0.0216735	0.0302673	0.0328203	0.0350795	0.018147	0.0244382	0.0244099	0.0185997	0.0236007	0.634739	0.0254071	0.0233727
chr9:57389844	chr9	57389844	+	UTR	Fam219b,Gm26631,Mpi	ENSMUSG00000032305,ENSMUSG00000097445,ENSMUSG00000032306	0.0209811	0.0122582	0.0225163	0.0271997	0.0205279	0.0229847	0.0248843	0.0277148	0.0277778	0.0493201	0.0385363	0.0221463	0.0349548	0.0185772	0.018333	0.0316078	0.0198919	0.0118198	0.0311756	0.0203287	0.0206194	0.0268398	0.348544	0.026791	0.0232995
chr9:72945061	chr9	72945061	+	UTR	Khdc3,Rab27a	ENSMUSG00000092622,ENSMUSG00000032202	0.0136848	0.0114387	0.0146104	0.0109318	0.0145805	0.0117413	0.0161962	0.0126682	0.00779203	0.0143457	0.0112154	0.0110403	0.0163571	0.0151481	0.0129627	0.013853	0.0132174	0.0127009	0.0152807	0.0166325	0.0136396	0.0133285	0.133608	0.012655	0.0140146
chrX:148304092	chrX	148304092	+	Intron	Huwe1	ENSMUSG00000025261	0.477778	0.333333	0.396825	0.527778	0.277778	0.222222	0.277778	0.507769	0.333333	0.333333	0.622222	0.111111	0.35	0.174603	0.373366	0.107212	0.185264	0.21011	0.3591	0.288889	0.266504	0.211267	0.00446074	0.391832	0.239766
chrX:148304093	chrX	148304093	+	Intron	Huwe1	ENSMUSG00000025261	0.0833333	0.15	0.214286	0.305556	0.444444	0.111111	0.194444	0.161905	0.166667	0.111111	0.222222	0.0555556	0.2	0.0661376	0.212827	0.162768	0.123106	0.0846847	0.0998217	0.155556	0.197114	0.085237	0.0791778	0.196825	0.131164
chrX:7484230	chrX	7484230	+	UTR	Gm10490,Gm10491,Timm17b	ENSMUSG00000073290,ENSMUSG00000073291,ENSMUSG00000031158	0.0247233	0.0400966	0.0329117	0.053727	0.0315835	0.035589	0.0840163	0.026011	0.0646429	0.0962792	0.0474347	0.0240285	0.0194764	0.0448783	0.0303779	0.0330071	0.0402016	0.0310473	0.034219	0.0350131	0.0297588	0.0303904	0.036257	0.0488196	0.0320362
chrX:7484235	chrX	7484235	+	UTR	Gm10490,Gm10491,Timm17b	ENSMUSG00000073290,ENSMUSG00000073291,ENSMUSG00000031158	0.0197144	0.0294991	0.0330821	0.0319766	0.0241841	0.032229	0.0771692	0.021742	0.0457692	0.0738274	0.0390823	0.0218105	0.0169577	0.0379664	0.0265187	0.0302677	0.0321245	0.0251771	0.0240259	0.029598	0.0227663	0.0245753	0.0569939	0.0389341	0.0265262
chrX:7484249	chrX	7484249	+	UTR	Gm10490,Gm10491,Timm17b	ENSMUSG00000073290,ENSMUSG00000073291,ENSMUSG00000031158	0.0135484	0.0151315	0.0135946	0.0127531	0.0237472	0.0105313	0.00376648	0.0120141	0.00617284	0.0257486	0.00779137	0.0169082	0.0114178	0.00896629	0.0160824	0.0152551	0.0121972	0.0109906	0.0132385	0.0102311	0.0124355	0.010737	0.792424	0.0131636	0.0125872
chr10:126504936	chr10	126504936	-	UTR	AC134329.1,Cdk4,Tspan31	ENSMUSG00000112639,ENSMUSG00000006728,ENSMUSG00000006736	0.00743261	0.00538228	0.00860259	0.00449917	0.00215054	0.00793928	0.00347941	0.00495567	0.0102816	0.00439551	0.000910747	0.0039032	0.00535546	0.00356914	0.00508634	0.00668632	0.00640872	0.00685864	0.00506914	0.00489469	0.00413598	0.00397008	0.692377	0.00545722	0.00508525
chr10:126504938	chr10	126504938	-	UTR	AC134329.1,Cdk4,Tspan31	ENSMUSG00000112639,ENSMUSG00000006728,ENSMUSG00000006736	0.00660786	0.00545959	0.00719721	0.00333289	0.00632832	0.00388882	0.00457868	0.00439945	0.00525344	0.00311533	0.00220776	0.000848176	0.00888276	0.00296029	0.00724149	0.00525161	0.00517743	0.00433961	0.00751394	0.0049581	0.00653512	0.00558983	0.451764	0.00476085	0.00539076
chr10:33709058	chr10	33709058	-	intergenic	AC153962.3	ENSMUSG00000112280	0.666667	0.333333	0.611111	0.333333	0.666667	0.666667	0.333333	0.555556	0.5	0.333333	0.5	0.27619	0.716667	0.9	0.688889	0.805556	0.488095	0.626984	0.75	0.794444	0.666667	0.628788	0.0216444	0.5	0.66748
chr10:80042939	chr10	80042939	-	Exon	-,Abhd17a,Gm26710,Klf16	none,ENSMUSG00000003346,ENSMUSG00000097013,ENSMUSG00000035397	0.0188041	0.0250135	0.0365029	0.0431132	0.0259586	0.0378571	0.0431717	0.0501094	0.0287456	0.0270115	0.0451017	0.0301084	0.046243	0.0374524	0.0452683	0.0339369	0.0400233	0.0358132	0.0432629	0.0410002	0.0429746	0.0392022	0.163734	0.0346718	0.0395714
chr11:109118715	chr11	109118715	-	UTR	Rgs9	ENSMUSG00000020599	0.00999012	0.0164502	0.0142651	0.00936142	0.00792671	0.0096352	0.00693828	0.0111604	0.0102428	0.00425532	0.0142493	0.00484922	0.0119615	0.0136478	0.0091563	0.0143659	0.0073483	0.0083867	0.00627349	0.0118644	0.00935288	0.0105303	0.666225	0.0104068	0.00979426
chr11:109118729	chr11	109118729	-	UTR	Rgs9	ENSMUSG00000020599	0.109954	0.146847	0.0813199	0.0909522	0.0815972	0.0891645	0.100497	0.0687793	0.136538	0.146718	0.0780002	0.0578317	0.0917639	0.0844073	0.0830451	0.0977692	0.0821202	0.0881212	0.106889	0.0911333	0.0871732	0.0717243	0.0836901	0.102761	0.0856344
chr11:119958616	chr11	119958616	-	Exon	Ndufaf8,Tepsin	ENSMUSG00000078572,ENSMUSG00000025377	0.00517665	0.00394495	0.00757129	0.00515928	0.00675551	0.00920837	0.00700487	0.00588489	0.00662747	0.00773317	0.00491624	0.00544434	0.00917516	0.0074688	0.00895275	0.00748822	0.00742248	0.00802458	0.00937804	0.00711112	0.00988109	0.00854945	0.00929038	0.00636206	0.00808146
chr11:120586130	chr11	120586130	-	intergenic	Cbr2,Dcxr,Lrrc45,Rac3	ENSMUSG00000025150,ENSMUSG00000039450,ENSMUSG00000025145,ENSMUSG00000018012	0.0107664	0.0115794	0.0110542	0.00890564	0.00617423	0.00966927	0.00835129	0.0109173	0.00487805	0.0090203	0.00220751	0.00551066	0.00686404	0.00763637	0.00781535	0.00581494	0.00722815	0.00740984	0.00766299	0.00507831	0.00813029	0.00652568	0.0999975	0.00850215	0.00687969
chr11:40516085	chr11	40516085	-	UTR	Hmmr	ENSMUSG00000020330	0.0124917	0.012312	0.012885	0.0151548	0.0158517	0.00897764	0.0202527	0.0128806	0.0133672	0.0181864	0.00740247	0.0154759	0.0247307	0.0223495	0.028431	0.0206371	0.0305653	0.0261758	0.0267537	0.0205839	0.0282205	0.0275251	3.514e-06	0.0136148	0.0246771
chr11:51524932	chr11	51524932	-	Intron	Sec24a	ENSMUSG00000036391	0.0128605	0.0273757	0.00520833	0.0151269	0.00326797	0.0198525	0.0186853	0.0130096	0.0243867	0.0113636	0.0101103	0.0145248	0.0180343	0.0164344	0.0169213	0.0067104	0.0065211	0.00378193	0.00918938	0.00996593	0.0119136	0.0154077	0.293377	0.0146589	0.0117641
chr11:53077860	chr11	53077860	-	Exon	Hspa4	ENSMUSG00000020361	0.309524	0.232804	0.142857	0.237162	0.360606	0.442857	0.0952381	0.375661	0.25	0.481481	0.16934	0.0740741	0.015873	0.0571429	0.20346	0.174342	0.0642857	0.102273	0.181385	0.208333	0.106883	0.169853	0.00133194	0.281594	0.123446
chr11:6160898	chr11	6160898	-	Intron	Ddx56	ENSMUSG00000004393	0.0957265	0.124638	0.178566	0.15311	0.127896	0.172343	0.106798	0.123963	0.157201	0.133747	0.165741	0.0767544	0.133333	0.0533333	0.0423188	0.0681992	0.0466667	0.0684524	0.0441919	0.0998994	0.0589372	0.0563158	4.84048e-06	0.139975	0.0680366
chr11:68800389	chr11	68800389	-	UTR	Mir3062,Pfas	ENSMUSG00000092727,ENSMUSG00000020899	0.0110791	0.00601859	0.0123837	0.0102919	0.00947708	0.0125697	0.0121996	0.011066	0.009914	0.0126441	0.0139077	0.00621678	0.0149286	0.0134052	0.012297	0.0116651	0.0158228	0.0119679	0.0160977	0.0130689	0.0144979	0.0136457	0.0683537	0.0110501	0.0130558
chr11:68800393	chr11	68800393	-	UTR	Mir3062,Pfas	ENSMUSG00000092727,ENSMUSG00000020899	0.00561705	0.00529331	0.00898861	0.00790094	0.00564115	0.00786143	0.00623583	0.00879146	0.010113	0.00906793	0.00700508	0.00773335	0.0111213	0.0132676	0.00929468	0.00943029	0.0105437	0.0101529	0.0119296	0.00699522	0.0119431	0.0127896	0.00112101	0.00750144	0.0104729
chr11:69216793	chr11	69216793	-	Exon	Kdm6b,Kdm6bos	ENSMUSG00000018476,ENSMUSG00000085178	0.094246	0.123397	0.0896686	0.141865	0.1443	0.10747	0.177795	0.163973	0.20098	0.137037	0.145425	0.111909	0.173611	0.151042	0.200075	0.185496	0.233752	0.288436	0.144863	0.0973312	0.148294	0.265113	0.0538173	0.138742	0.181811
chr11:75114079	chr11	75114079	-	UTR	Rpa1	ENSMUSG00000000751	0.457167	0.504621	0.485938	0.47901	0.489633	0.494209	0.44341	0.49524	0.543906	0.677553	0.694778	0.324934	0.37145	0.448296	0.423835	0.38932	0.364507	0.422963	0.45614	0.535822	0.569043	0.594444	0.0441205	0.524133	0.445523
chr11:75114080	chr11	75114080	-	UTR	Rpa1	ENSMUSG00000000751	0.236086	0.227701	0.258254	0.224061	0.247962	0.235484	0.208383	0.267629	0.254853	0.354863	0.361134	0.151852	0.193781	0.265185	0.239583	0.194056	0.20621	0.234407	0.323176	0.229303	0.340374	0.354157	0.605605	0.261492	0.248371
chr11:75114086	chr11	75114086	-	UTR	Rpa1	ENSMUSG00000000751	0.161614	0.133791	0.148758	0.149043	0.152859	0.178221	0.163711	0.145683	0.160152	0.100913	0.0937913	0.0727124	0.14305	0.210826	0.146667	0.18883	0.104858	0.157313	0.0993308	0.141061	0.0897486	0.115952	0.480552	0.144412	0.133668
chr11:75114120	chr11	75114120	-	UTR	Rpa1	ENSMUSG00000000751	0.0299896	0.0331069	0.0374211	0.0227196	0.0235638	0.0282111	0.0247277	0.032913	0.0287879	0.0573294	0.0607322	0.0114943	0.00724638	0.00740741	0.0209138	0.0533428	0.0114943	0.0681381	0.0286446	0.0516619	0.0249767	0.0411831	0.524448	0.0345002	0.0296821
chr11:75114502	chr11	75114502	-	UTR	Rpa1	ENSMUSG00000000751	0.0338948	0.0342757	0.038749	0.0333671	0.0421397	0.0379862	0.0329308	0.0363555	0.0590879	0.0786172	0.0973967	0.0297619	0.0465095	0.00606061	0.0263119	0.0350401	0.035628	0.0620118	0.0285853	0.0638528	0.100364	0.055782	0.755061	0.0477091	0.0445371
chr11:75114517	chr11	75114517	-	UTR	Rpa1	ENSMUSG00000000751	0.639765	0.611735	0.655209	0.648447	0.617171	0.689023	0.655374	0.670572	0.701744	0.789147	0.807629	0.450855	0.521745	0.577922	0.55957	0.569673	0.537968	0.61457	0.646192	0.642377	0.762403	0.618519	0.00936943	0.680529	0.591072
chr11:75875719	chr11	75875719	-	Exon	Vps53	ENSMUSG00000017288	0.00429954	0.00864117	0.00899486	0.00729711	0.00604782	0.00324089	0.00578292	0.0119771	0.00913309	0.00255952	0.013622	0.00492691	0.00693404	0.0158993	0.0105888	0.00820162	0.0108611	0.0102988	0.00934276	0.00927023	0.00886534	0.0110524	0.110478	0.00741782	0.0096583
chr11:79747585	chr11	79747585	-	UTR	Utp6	ENSMUSG00000035575	0.0208232	0.0364224	0.0345171	0.0304192	0.0407276	0.0357246	0.0333382	0.0222218	0.02	0.0373017	0.00903541	0.0411224	0.0518255	0.0445913	0.0284491	0.0583734	0.0467349	0.0697735	0.0261073	0.068952	0.0470637	0.0327578	0.00334949	0.0291392	0.0468864
chr11:97505832	chr11	97505832	-	Exon	Gm11613	ENSMUSG00000085586	0.0130902	0.033795	0.00751617	0.0090472	0.0251462	0.0106642	0.0323482	0.0184372	0.00224215	0.00978019	0.00718374	0.00590387	0.00977165	0.00897866	0.0166307	0.00829939	0.015636	0.0107833	0.00987112	0.0142029	0.012587	0.0255927	0.4428	0.0153864	0.0125688
chr11:97505848	chr11	97505848	-	Exon	Gm11613	ENSMUSG00000085586	0.014721	0.0389263	0.0157779	0.021157	0.0275118	0.016657	0.0347602	0.0257094	0.00746465	0.0110778	0.0181135	0.0115237	0.0144151	0.0156604	0.0185957	0.0117957	0.0152088	0.0149181	0.0131083	0.0230742	0.0242572	0.0336795	0.374856	0.0210797	0.0178397
chr11:97505853	chr11	97505853	-	Exon	Gm11613	ENSMUSG00000085586	0.0185662	0.0399275	0.0145653	0.0213855	0.022861	0.0548716	0.0375956	0.0276263	0.0146696	0.00738193	0.024689	0.0167402	0.0160289	0.0223558	0.0249869	0.0130315	0.0158784	0.0193524	0.0186719	0.0260011	0.0286693	0.0384709	0.402265	0.0258309	0.0218352
chr11:97505863	chr11	97505863	-	Exon	Gm11613	ENSMUSG00000085586	0.0361145	0.0355746	0.0393088	0.0540795	0.0346317	0.0554099	0.0415382	0.0545981	0.0516409	0.031922	0.0550972	0.0296272	0.0406503	0.0484275	0.0520501	0.037671	0.0465166	0.0482875	0.0494609	0.0627748	0.0496181	0.0596716	0.441912	0.0445378	0.0477051
chr11:97505865	chr11	97505865	-	Exon	Gm11613	ENSMUSG00000085586	0.00941043	0.0123057	0.0219314	0.0140725	0.0142665	0.0240002	0.00572246	0.0283051	0.0203833	0.0150331	0.027773	0.0133015	0.0118567	0.0140451	0.0203918	0.014089	0.0114981	0.0188641	0.0128556	0.0246706	0.025183	0.0204801	0.843502	0.017564	0.0170214
chr11:97506872	chr11	97506872	-	Exon	-,Gm11613	none,ENSMUSG00000085586	0.0242142	0.0186321	0.0240749	0.0246872	0.0222879	0.0241937	0.0150936	0.0222426	0.0222083	0.0131487	0.0162239	0.0189709	0.0254493	0.0337806	0.0339099	0.0407403	0.028898	0.0274267	0.0315714	0.0261914	0.0277827	0.0207877	0.00185872	0.020637	0.0286826
chr11:97506876	chr11	97506876	-	Exon	-,Gm11613	none,ENSMUSG00000085586	0.0108631	0.00400737	0.00416042	0.0113185	0.00558252	0.00886299	0.00478728	0.00442195	0.003861	0.00617621	0.0081971	0.00918606	0.0102412	0.0075712	0.00969728	0.0081913	0.00439123	0.0055549	0.00407973	0.0114392	0.0076317	0.00864295	0.249221	0.00656713	0.00787516
chr11:97506882	chr11	97506882	-	Exon	-,Gm11613	none,ENSMUSG00000085586	0.0201049	0.0181543	0.0238928	0.0234085	0.0209447	0.0180855	0.020202	0.014204	0.0264595	0.0356161	0.0333864	0.0153886	0.0229469	0.0259971	0.024035	0.0265266	0.0263138	0.0235807	0.0249386	0.0191963	0.0173835	0.0212189	0.784199	0.0231326	0.0225024
chr11:97506916	chr11	97506916	-	Exon	-,Gm11613	none,ENSMUSG00000085586	0.0151515	0.0169042	0.0330484	0.0087963	0.0297697	0.0143408	0.0114943	0.0130446	0.0405844	0.0204082	0.00775194	0.00769231	0.0290794	0.0138606	0.0062627	0.0105375	0.00215054	0.0141741	0.0182397	0.0136967	0.0183157	0.0169396	0.17426	0.0192086	0.0137226
chr12:114196400	chr12	114196400	-	intergenic	-,Brf1	none,ENSMUSG00000011158	0.337302	0.166667	0.333333	0.125	0.45	0.283333	0.373016	0.293651	0.325	0.335185	0.273737	0.194444	0.466667	0.111111	0.190476	0.0555556	0.277778	0.133333	0.455952	0.206349	0.178571	0.166667	0.119748	0.299657	0.221537
chr12:114196453	chr12	114196453	-	intergenic	-,Brf1	none,ENSMUSG00000011158	0.528042	0.194444	0.288889	0.332804	0.362963	0.232275	0.356481	0.337729	0.342857	0.458333	0.413105	0.150794	0.3	0.535354	0.151515	0.242063	0.208333	0.0846561	0.336752	0.3	0.0666667	0.415079	0.0775791	0.349811	0.253747
chr12:56383916	chr12	56383916	-	Exon	AC166323.1,Ppp2r3c	ENSMUSG00000112368,ENSMUSG00000021022	0.158018	0.225577	0.133547	0.171066	0.232271	0.278384	0.227961	0.227273	0.344697	0.101916	0.209216	0.133333	0.430556	0.239316	0.471429	0.344322	0.138889	0.694444	0.366667	0.269841	0.355556	0.318182	0.0193691	0.209993	0.342049
chr12:74412481	chr12	74412481	-	UTR	Slc38a6	ENSMUSG00000044712	0.0111238	0.0148649	0.00818251	0.00847415	0.00780292	0.00621891	0.0142284	0.00983586	0.0113122	0.00997428	0.0122595	0.00882088	0.0210539	0.0149217	0.0321937	0.0155898	0.0121056	0.0113449	0.0158853	0.0122787	0.0216812	0.0132499	0.0121649	0.0103889	0.0162842
chr13:107786841	chr13	107786841	-	UTR	Kif2a	ENSMUSG00000021693	0.115661	0.0548341	0.047619	0.020453	0.0434783	0.0356757	0.0452489	0.0831502	0.0166667	0.0454545	0.123081	0.0375903	0.0411712	0.0315431	0.0571462	0.0755922	0.032536	0.0687408	0.0887451	0.0439095	0.060156	0.0628007	0.815172	0.057393	0.0545392
chr13:14103153	chr13	14103153	-	Intron	Tbce	ENSMUSG00000039233	0.222222	0.111111	0.294872	0.412698	0.35	0.3	0.142857	0.361905	0.442857	0.254545	0.277778	0.2	0.0811966	0.104149	0.0464744	0.194872	0.265608	0.037037	0.0444444	0.0238095	0.047619	0.193939	0.000310327	0.288259	0.11265
chr13:49626893	chr13	49626893	-	UTR	Cenpp,Ecm2	ENSMUSG00000021391,ENSMUSG00000043631	0.0144448	0.0106018	0.0180568	0.0164931	0.0288547	0.0235933	0.0159314	0.0241604	0.0125	0.0263934	0.00297619	0.00297303	0.0142873	0.0116183	0.0083325	0.0189028	0.0127767	0.0125741	0.0143483	0.00505468	0.0109129	0.0121401	0.0269901	0.0176369	0.0112655
chr13:64467953	chr13	64467953	-	Intron	CT030159.2,CT030159.4,Ctsl	ENSMUSG00000113683,ENSMUSG00000114072,ENSMUSG00000021477	0.996448	0.992427	0.987181	0.991589	0.992272	0.986743	0.995084	0.992765	0.998051	0.990457	0.987499	0.624698	0.89828	0.900097	0.856926	0.927827	0.887244	0.920098	0.943064	0.941388	0.914672	0.928536	0.000888144	0.991865	0.885712
chr13:67573961	chr13	67573961	-	UTR	AC154510.1,Zfp874b	ENSMUSG00000114788,ENSMUSG00000059839	0.003367	0.0117779	0.0100431	0.00248756	0.011329	0.00528846	0.0127315	0.00853691	0.0476105	0.0181223	0.00311526	0.0125632	0.00887615	0.0091014	0.0100818	0.0112031	0.0105486	0.0134333	0.0153191	0.0136994	0.0112189	0.0125687	0.893204	0.012219	0.0116922
chr13:67573998	chr13	67573998	-	UTR	AC154510.1,Zfp874b	ENSMUSG00000114788,ENSMUSG00000059839	0.208305	0.203751	0.187166	0.316903	0.282794	0.14957	0.283516	0.246226	0.206214	0.224022	0.210809	0.139678	0.234752	0.289995	0.210572	0.29236	0.24483	0.237973	0.258619	0.231124	0.205303	0.246477	0.738449	0.229025	0.235608
chr13:67574014	chr13	67574014	-	UTR	AC154510.1,Zfp874b	ENSMUSG00000114788,ENSMUSG00000059839	0.0262626	0.0162989	0.0505096	0.0326531	0.0345679	0.0629205	0.0169492	0.056353	0.0434982	0.0295267	0.0580357	0.0245045	0.0302759	0.0230849	0.0290179	0.045261	0.038413	0.0341606	0.0705123	0.0295312	0.0521508	0.0399049	0.881895	0.0388705	0.0378925
chr13:67574272	chr13	67574272	-	UTR	AC154510.1,Zfp874b	ENSMUSG00000114788,ENSMUSG00000059839	0.00694084	0.0071495	0.0122269	0.0119935	0.0176115	0.014188	0.00650686	0.0105944	0.0117624	0.00718444	0.00751308	0.00962323	0.00840401	0.0134556	0.0118772	0.0112964	0.00667449	0.0127267	0.00976537	0.00619886	0.00775303	0.00773306	0.58018	0.0103338	0.00959164
chr14:51396562	chr14	51396562	-	Intron	Ttc5	ENSMUSG00000006288	0.00834524	0.00981607	0.0109688	0.0130666	0.0105009	0.0108477	0.019093	0.00981663	0.00892816	0.0124033	0.0121927	0.0119838	0.0130334	0.0122879	0.0169688	0.0151223	0.0186992	0.0155658	0.012396	0.0167307	0.0164884	0.0173072	0.00387747	0.0114526	0.015144
chr14:51396566	chr14	51396566	-	Intron	Ttc5	ENSMUSG00000006288	0.00903303	0.00801771	0.0083886	0.00771384	0.00530536	0.00596218	0.00842648	0.00484376	0.00579903	0.00440974	0.00371131	0.00588574	0.0104023	0.0137524	0.0169528	0.00996812	0.0130175	0.0146846	0.014268	0.0149036	0.0171914	0.0159332	9.78687e-06	0.00651009	0.01336
chr14:56500451	chr14	56500451	-	UTR	-,Cbln3,Khnyn	none,ENSMUSG00000040380,ENSMUSG00000047153	0.00345047	0.00282062	0.00338229	0.00547032	0.00499809	0.00457335	0.00652956	0.00552131	0.0015873	0.00213705	0.00340246	0.00759416	0.00426205	0.00743774	0.0115117	0.0069349	0.00744861	0.00688662	0.00621273	0.00789029	0.00697993	0.00670873	0.000136961	0.00398844	0.00726068
chr14:68312515	chr14	68312515	-	Intron	Cdca2	ENSMUSG00000048922	0.25	0.490476	0.444444	0.805556	0.625	0.616667	0.388889	0.444444	0.166667	0.518519	0.583333	0.166667	0.388278	0.361111	0.515152	0.336508	0.333333	0.227273	0.305556	0.416472	0.306777	0.434524	0.033084	0.484909	0.344695
chr14:70983561	chr14	70983561	-	UTR	Fam160b2,Nudt18	ENSMUSG00000022095,ENSMUSG00000045211	0.333868	0.280449	0.326768	0.431746	0.458333	0.362734	0.388091	0.227273	0.272222	0.418981	0.298306	0.167582	0.30376	0.252645	0.300936	0.317978	0.257947	0.265343	0.318745	0.293684	0.340502	0.304212	0.0302711	0.345343	0.283939
chr14:70983563	chr14	70983563	-	UTR	Fam160b2,Nudt18	ENSMUSG00000022095,ENSMUSG00000045211	0.114379	0.198616	0.208725	0.207724	0.336111	0.229365	0.261183	0.29329	0.277273	0.117725	0.330556	0.231593	0.336734	0.270927	0.28386	0.26288	0.265762	0.272466	0.356639	0.273418	0.298518	0.273038	0.0587014	0.234086	0.284167
chr14:76119526	chr14	76119526	-	Exon	Cog3	ENSMUSG00000034893	0.511813	0.524123	0.597389	0.504401	0.552669	0.588095	0.640079	0.502442	0.619444	0.52085	0.553472	0.254079	0.43663	0.462963	0.388889	0.406371	0.423461	0.377778	0.475	0.32265	0.546032	0.309524	2.98932e-05	0.555889	0.400307
chr15:12739626	chr15	12739626	-	UTR	6030458C11Rik	ENSMUSG00000022195	0.00876833	0.010151	0.00529168	0.00892875	0.0122748	0.00790745	0.00858945	0.009324	0.0149283	0.0131348	0.0134304	0.0129946	0.0121194	0.013464	0.017663	0.0116051	0.0154412	0.00932052	0.0113936	0.0127453	0.0138817	0.0126059	0.0189612	0.0102481	0.0130213
chr15:36534482	chr15	36534482	-	Exon	Pabpc1	ENSMUSG00000022283	0.0410202	0.034644	0.0114742	0.0399113	0.0152426	0.0278881	0.0432479	0.0399191	0.0232558	0.0371631	0.0399919	0.0288486	0.0233146	0.031898	0.0292162	0.0317007	0.0216901	0.0322083	0.0264773	0.0227453	0.0154584	0.0328849	0.178421	0.0321598	0.0269493
chr15:38422000	chr15	38422000	-	Exon	Azin1,Mir6951	ENSMUSG00000037458,ENSMUSG00000099110	0.111111	0.0266667	0.0190476	0.0383772	0.0222222	0.0707071	0.114773	0.047619	0.03125	0.0842593	0.0791246	0.109722	0.186988	0.0964194	0.138591	0.115476	0.127976	0.176984	0.0555556	0.160256	0.137529	0.116097	0.000188385	0.0586507	0.129236
chr15:72824955	chr15	72824955	-	Intron	Trappc9	ENSMUSG00000047921	0.0190408	0.020412	0.0196809	0.0167549	0.0159907	0.0243108	0.0109204	0.0130933	0.0389418	0.0215645	0.0251841	0.0103674	0.0114204	0.00729268	0.0138623	0.0126594	0.0104874	0.0134143	0.00716465	0.0136089	0.00936146	0.0128128	0.000771414	0.0205358	0.011132
chr15:72825131	chr15	72825131	-	Intron	Trappc9	ENSMUSG00000047921	0.00661771	0.0141129	0.00589843	0.00851147	0.00291924	0.00908756	0.00756952	0.00979306	0.00488727	0.00520009	0.00346662	0.0055674	0.00877127	0.00730279	0.0071883	0.0061387	0.00719152	0.00732223	0.00751938	0.00783457	0.00629479	0.00465231	0.842371	0.00709672	0.00688939
chr15:72825144	chr15	72825144	-	Intron	Trappc9	ENSMUSG00000047921	0.0170395	0.0282376	0.0301232	0.0290748	0.0289382	0.0237882	0.0238108	0.0259849	0.0332759	0.0230494	0.0209817	0.0129693	0.0178082	0.0216764	0.0234921	0.0266719	0.0251261	0.0234157	0.02456	0.0247341	0.0246241	0.026802	0.131653	0.0258458	0.0228982
chr15:72825148	chr15	72825148	-	Intron	Trappc9	ENSMUSG00000047921	0.0235552	0.0232188	0.019317	0.0183835	0.0226874	0.0198763	0.015205	0.0221388	0.0135426	0.0137047	0.0145313	0.0109931	0.0179583	0.0202748	0.0199118	0.0202674	0.0232479	0.0161252	0.0209504	0.021392	0.0193399	0.0209616	0.760344	0.0187419	0.0192202
chr15:98388752	chr15	98388752	-	Intron	Ccnt1	ENSMUSG00000011960	0.0925926	0.0892857	0.0277778	0.0883838	0.0666667	0.0666667	0.121212	0.141667	0.133333	0.030303	0.257143	0.0185185	0.0820301	0.025987	0.0622896	0.0892056	0.0545314	0.0542929	0.0389247	0.119984	0.107382	0.0835257	0.126411	0.101366	0.0669701
chr15:99575157	chr15	99575157	-	Intron	Cers5	ENSMUSG00000023021	0.166667	0.025641	0.333333	0.115616	0.407407	0.0992063	0.566667	0.222222	0.363636	0.288889	0.2	0.333333	0.166667	0.693061	0.0289855	0.166667	0.638889	0.606061	0.234722	0.0578704	0.378788	0.67803	0.241783	0.253571	0.362098
chr16:13834085	chr16	13834085	-	UTR	Ntan1,Pdxdc1	ENSMUSG00000022681,ENSMUSG00000022680	0.0170644	0.00851094	0.0167503	0.0116213	0.0125035	0.0119329	0.0119425	0.00725532	0.0173423	0.0135538	0.00711825	0.00461452	0.00710488	0.00939756	0.00920361	0.0100847	0.0104788	0.0105973	0.0108831	0.00857013	0.00788306	0.00632879	0.00881462	0.0123269	0.00864968
chr16:13834110	chr16	13834110	-	UTR	Ntan1,Pdxdc1	ENSMUSG00000022681,ENSMUSG00000022680	0.0145455	0.00277149	0.00785867	0.00445988	0.00327869	0.000913242	0.00252229	0.0109779	0.00823191	0.00120773	0.00526848	0.00481724	0.00424788	0.00443627	0.0060598	0.00396409	0.00417062	0.00573258	0.00876386	0.00827035	0.00723899	0.0089957	0.769663	0.00563962	0.0060634
chr16:13834111	chr16	13834111	-	UTR	Ntan1,Pdxdc1	ENSMUSG00000022681,ENSMUSG00000022680	0.00816457	0.00941168	0.0106133	0.0155256	0.00764142	0.00430881	0.0047619	0.00652128	0.00862069	0.00751651	0.00451781	0.00512906	0.00866148	0.00920075	0.00849996	0.00984689	0.00596265	0.00559948	0.00709314	0.00924069	0.0121501	0.00991618	0.776893	0.00796396	0.00830004
chr16:18872218	chr16	18872218	-	UTR	Gm28539,Hira,Mrpl40	ENSMUSG00000099908,ENSMUSG00000022702,ENSMUSG00000022706	0.00802749	0.0108225	0.00204499	0.010101	0.0145913	0.0198882	0.00983584	0.0119446	0.00699848	0.0130807	0.00744048	0.0273113	0.0321982	0.0518764	0.0312543	0.0391372	0.0474746	0.0346371	0.0434407	0.0262838	0.0518993	0.0414785	1.46814e-08	0.0104341	0.0388174
chr16:31960752	chr16	31960752	-	Intron	Ncbp2,Senp5	ENSMUSG00000022774,ENSMUSG00000022772	0.0885529	0.0850949	0.130266	0.0938248	0.0872615	0.108609	0.0813304	0.112264	0.0981395	0.07212	0.105987	0.0907434	0.200968	0.118375	0.123659	0.11718	0.0994513	0.122804	0.144803	0.144883	0.148261	0.143926	0.00239465	0.0966773	0.132278
chr16:4660986	chr16	4660986	-	Exon	Coro7,Dnaja3	ENSMUSG00000039637,ENSMUSG00000004069	0.0160381	0.00944188	0.00802905	0.00953773	0.00726649	0.00874055	0.00825825	0.00536668	0.00980384	0.00605599	0.00494957	0.00416242	0.0126902	0.0169172	0.0104393	0.0124084	0.0116314	0.0122405	0.0156097	0.0101252	0.00804679	0.010836	0.0499766	0.00849892	0.0113734
chr16:77093989	chr16	77093989	-	Intron	Usp25	ENSMUSG00000022867	0.937322	0.897724	0.899473	0.932024	0.898479	0.943441	0.903331	0.947691	0.950595	0.933062	0.930415	0.277778	0.289683	0.327778	0.558923	0.5	0.470034	0.52381	0.579762	0.546032	0.384016	0.277778	2.01456e-11	0.924869	0.430508
chr16:87945568	chr16	87945568	-	Intron	Grik1	ENSMUSG00000022935	0.5	0.722222	0.65	0.388889	0.555556	0.666667	0.410256	0.833333	0.5	0.833333	0.777778	0.480769	0.773077	0.680769	0.698485	0.592593	0.664683	0.571795	0.638258	0.563492	0.457071	0.741402	0.969598	0.621639	0.623854
chr16:87945624	chr16	87945624	-	Intron	Grik1	ENSMUSG00000022935	0.0433049	0.0437633	0.0676515	0.0767473	0.0688146	0.0825834	0.0416991	0.0626664	0.0903479	0.0700323	0.0606887	0.0273985	0.0487469	0.0421074	0.0617134	0.0752147	0.0554476	0.0550185	0.0608628	0.0546093	0.0666276	0.0669117	0.190705	0.0643908	0.055878
chr17:24299404	chr17	24299404	-	Exon	Amdhd2,Atp6v0c,Gm43796	ENSMUSG00000036820,ENSMUSG00000024121,ENSMUSG00000107169	0.00187599	0.00597509	0.00531336	0.0037635	0.00870923	0.00918345	0.00342938	0.00606663	0.0068742	0.00510207	0.00528411	0.0023218	0.0058446	0.00521032	0.00270943	0.00408774	0.00499017	0.00359269	0.00398238	0.00381926	0.00176487	0.00381786	0.0290815	0.00559791	0.00383101
chr17:32441536	chr17	32441536	-	UTR	Akap8	ENSMUSG00000024045	0.00490196	0.00940623	0.00501253	0.003367	0.00669075	0.0141026	0.0045045	0.00445712	0.00438596	0.00606261	0.00952381	0.0123457	0.0193569	0.0192886	0.00696565	0.0331657	0.0220969	0.0267007	0.0301302	0.0332279	0.0224786	0.0108925	4.05482e-05	0.00658319	0.0215136
chr17:32473150	chr17	32473150	-	Intron	Akap8l	ENSMUSG00000002625	0.981703	0.981481	0.990741	0.976068	0.971014	1	0.972503	0.985507	0.942434	0.927728	1	0.633333	0.838095	0.766667	0.805556	0.966667	0.8	0.761905	0.875	0.847222	0.80303	0.972222	5.2264e-05	0.97538	0.824518
chr17:32955775	chr17	32955775	-	UTR	Gm26693,Zfp799	ENSMUSG00000097030,ENSMUSG00000095253	0.0146518	0.00516715	0.0128207	0.00834646	0.00528902	0.00586758	0.0127841	0.0031746	0.00488166	0.00797934	0.0116377	0.00694506	0.00915	0.0161063	0.00754389	0.0150746	0.00708269	0.0146465	0.0116176	0.0123653	0.0125825	0.0124875	0.0665289	0.00841819	0.0114184
chr17:33824244	chr17	33824244	-	UTR	Hnrnpm,March2	ENSMUSG00000059208,ENSMUSG00000079557	0.150488	0.173789	0.261111	0.174747	0.169312	0.0978836	0.351852	0.238095	0.166667	0.103704	0.180952	0.120471	0.128554	0.115518	0.125365	0.176008	0.119569	0.211755	0.116816	0.118475	0.130002	0.117775	0.0357026	0.188055	0.134574
chr17:33884473	chr17	33884473	-	UTR	Rab11b	ENSMUSG00000077450	0.0348306	0.0293287	0.0270462	0.0322812	0.020208	0.0243933	0.0291256	0.0356357	0.0242499	0.036175	0.0269685	0.0215773	0.0302711	0.0293261	0.0287533	0.029409	0.0276579	0.0324716	0.0272325	0.0243058	0.0264377	0.028741	0.486254	0.029113	0.0278349
chr17:36143416	chr17	36143416	-	UTR	A930015D03Rik,H2-T24	ENSMUSG00000092368,ENSMUSG00000053835	0.00818473	0.000992063	0.0038891	0.00469468	0.00217236	0.0037984	0.00545103	0.00800537	0.00604839	0.00524808	0.00125786	0.00483654	0.00798569	0.00292395	0.00736764	0.0026229	0.00425507	0.00769746	0.00322376	0.00521064	0.00581673	0.00141595	0.743259	0.00452201	0.00485057
chr17:36143417	chr17	36143417	-	UTR	A930015D03Rik,H2-T24	ENSMUSG00000092368,ENSMUSG00000053835	0.00388237	0.00473375	0.004371	0.00379477	0.00233906	0.00269087	0.00758566	0.00960285	0.00378788	0.0016835	0.00536181	0.00740842	0.00675891	0.0101906	0.00856557	0.00795477	0.00856816	0.00864474	0.00939846	0.0045382	0.00739115	0.00787366	0.000548814	0.00453032	0.00793569
chr17:46911871	chr17	46911871	-	UTR	2310039H08Rik,Gm26904,Rpl7l1	ENSMUSG00000062619,ENSMUSG00000097560,ENSMUSG00000063888	0.00661889	0.0106179	0.00559041	0.00847591	0.00684521	0.00861873	0.00610047	0.00389286	0.00537883	0.00597006	0.00490972	0.00571362	0.0139936	0.00934371	0.0166421	0.0100273	0.0154917	0.0148492	0.0126817	0.0151861	0.0119401	0.0129669	3.54249e-05	0.00663809	0.0126215
chr17:46911879	chr17	46911879	-	UTR	2310039H08Rik,Gm26904,Rpl7l1	ENSMUSG00000062619,ENSMUSG00000097560,ENSMUSG00000063888	0.0174206	0.026051	0.0274986	0.0279737	0.0182305	0.0252553	0.0149968	0.0169996	0.0305833	0.0226626	0.0155422	0.014354	0.0283255	0.015396	0.0186781	0.0249839	0.026076	0.0227095	0.0304105	0.0248382	0.0220558	0.032645	0.528515	0.0221104	0.0236793
chr17:63401967	chr17	63401967	-	intergenic	Fbxl17	ENSMUSG00000023965	0.0883053	0.0704314	0.064644	0.0750796	0.11458	0.109159	0.0684584	0.116387	0.12443	0.0740263	0.109731	0.0452489	0.0966711	0.1412	0.0846503	0.128609	0.11301	0.0948375	0.0849328	0.0859428	0.116936	0.0992624	0.512253	0.0922938	0.0992092
chr17:80436935	chr17	80436935	-	Exon	-,Gm22215,Hnrnpll	none,ENSMUSG00000088183,ENSMUSG00000024095	0.0457792	0.0225244	0.0299866	0.0404365	0.0716726	0.0261453	0.0148148	0.035818	0.0129006	0.0370196	0.0289495	0.00470035	0.00705209	0.0044256	0.00703235	0.00213675	0.00744407	0.0137136	0.00814834	0.00419287	0.00361069	0.00794878	2.93678e-05	0.033277	0.0064005
chr18:46325559	chr18	46325559	-	UTR	Trim36	ENSMUSG00000033949	0.00713112	0.00699329	0.00540328	0.0073806	0.00791434	0.00549215	0.00600601	0.0077778	0.00611814	0.00634124	0.00812199	0.00321706	0.00601655	0.00665828	0.00613641	0.00600884	0.0046138	0.006668	0.00533271	0.00728679	0.00541258	0.00730953	0.0651164	0.00678909	0.00587823
chr18:46325572	chr18	46325572	-	UTR	Trim36	ENSMUSG00000033949	0.00467828	0.00513015	0.00630351	0.00586391	0.00436724	0.00873593	0.00458035	0.0057956	0.00416034	0.00601771	0.00589709	0.00638292	0.00699292	0.0104199	0.00846956	0.00845067	0.00673139	0.00762405	0.00654795	0.00737653	0.0101186	0.00908293	0.000415619	0.00559365	0.00801794
chr18:70684634	chr18	70684634	-	UTR	Poli	ENSMUSG00000038425	0.0472554	0.0310709	0.0387882	0.0424032	0.0359742	0.0526122	0.0379066	0.0372548	0.0543384	0.0499292	0.0378578	0.026672	0.0370667	0.0489176	0.0430966	0.040111	0.0367123	0.0416382	0.0349061	0.0453706	0.0489249	0.046116	0.642542	0.0423083	0.0408666
chr18:80451116	chr18	80451116	-	UTR	Pqlc1	ENSMUSG00000034006	0.00429808	0.00308224	0.00679386	0.0061191	0.00400571	0.00461335	0.00519681	0.00350373	0.00376344	0.00355847	0.00774399	0.00250075	0.00594657	0.00545955	0.00788677	0.00855593	0.00747587	0.00697883	0.00566528	0.00588484	0.00428836	0.00924447	0.0480073	0.00478898	0.00635338
chr18:80451146	chr18	80451146	-	UTR	Pqlc1	ENSMUSG00000034006	0.022306	0.021009	0.0206681	0.0192141	0.0181544	0.0188656	0.0211326	0.0194827	0.0215853	0.0204363	0.0212853	0.0137401	0.020466	0.019773	0.0186856	0.0193436	0.0183839	0.0211311	0.0196563	0.0199548	0.0189518	0.0175067	0.0467194	0.0203763	0.0188721
chr18:80451190	chr18	80451190	-	UTR	Pqlc1	ENSMUSG00000034006	0.00518068	0.00629137	0.0120986	0.00894983	0.010102	0.0038716	0.00587036	0.00575695	0.0011655	0.008881	0.00566952	0.00237883	0.00435786	0.00956102	0.007366	0.00785443	0.0072574	0.00658763	0.0061203	0.00423617	0.00518634	0.00637432	0.594804	0.00671249	0.00611639
chr19:10590898	chr19	10590898	-	Intron	Sdhaf2	ENSMUSG00000024668	0.00848451	0.009822	0.0130142	0.0131766	0.0102687	0.0115012	0.01766	0.00903426	0.00906306	0.0173088	0.0157098	0.00720441	0.00978654	0.0115337	0.0109673	0.0110587	0.0107318	0.0105662	0.0130758	0.017592	0.0146978	0.019019	0.941657	0.0122767	0.0123848
chr19:10590903	chr19	10590903	-	Intron	Sdhaf2	ENSMUSG00000024668	0.0139802	0.0100559	0.0174616	0.0169601	0.00973916	0.013506	0.0173098	0.0106898	0.0137431	0.015861	0.0230303	0.0195282	0.0183549	0.0179537	0.0232276	0.0203769	0.0186722	0.0216788	0.017028	0.0247507	0.0226832	0.0243667	0.000461219	0.0147579	0.0207837
chr19:38862842	chr19	38862842	-	UTR	Noc3l,Plce1	ENSMUSG00000024999,ENSMUSG00000024998	0.0352846	0.018456	0.0283415	0.0119266	0.0214555	0.0205414	0.0158922	0.0230154	0.0239379	0.0307594	0.0217114	0.0316291	0.0244269	0.0435108	0.0374181	0.0403828	0.0475769	0.0418553	0.030952	0.0420395	0.0381308	0.0380943	3.4566e-05	0.0228475	0.0378197
chr19:4888591	chr19	4888591	-	UTR	Bbs1,Zdhhc24	ENSMUSG00000006464,ENSMUSG00000006463	0.00854408	0.0045066	0.00944935	0.00594626	0.00882485	0.00705457	0.00948003	0.00886698	0.00625	0.00784491	0.00504624	0.00669969	0.00681699	0.0069254	0.0104772	0.00919278	0.0069455	0.00983911	0.00998869	0.00790973	0.0105691	0.0101771	0.101399	0.00743763	0.00868557
chr19:4901492	chr19	4901492	-	Intron	Bbs1,Gm25334	ENSMUSG00000006464,ENSMUSG00000088661	0.0115597	0.0132622	0.00875421	0.0130719	0.0158446	0.0130744	0.0173872	0.0143215	0.0184829	0.00826734	0.0111464	0.0021097	0.00708208	0.0134076	0.00794711	0.00898153	0.0142206	0.0184166	0.0170537	0.0139503	0.0144423	0.00985502	0.36971	0.0131975	0.0115879
chr19:4901496	chr19	4901496	-	Intron	Bbs1,Gm25334	ENSMUSG00000006464,ENSMUSG00000088661	0.00358423	0.00266667	0.00749064	0.00993464	0.00411523	0.00512821	0.00520833	0.0072543	0.00704225	0.00866234	0.00347222	0.0105288	0.00161812	0.00343643	0.013947	0.0129543	0.00997054	0.00962133	0.00557819	0.00871123	0.011018	0.0062871	0.0670324	0.005869	0.00851554
chr19:61202003	chr19	61202003	-	Exon	Zfp950	ENSMUSG00000074733	0.0381944	0.0406071	0.0164835	0.0318586	0.0238095	0.0122582	0.0261398	0.0216365	0.0283242	0.0431373	0.0296037	0.0306373	0.0219804	0.0348854	0.0221546	0.0254319	0.022525	0.0379389	0.0320904	0.0445646	0.0472762	0.0374787	0.317531	0.0283684	0.0324512
chr19:61202005	chr19	61202005	-	Exon	Zfp950	ENSMUSG00000074733	0.0574248	0.0249094	0.0460007	0.0417569	0.0460317	0.00584795	0.0441292	0.067967	0.0283242	0.0218639	0.0496073	0.013516	0.0361789	0.0245224	0.0139446	0.029839	0.0388369	0.0179633	0.0358393	0.0287507	0.0164953	0.0550948	0.105047	0.0394421	0.028271
chr1:158359340	chr1	158359340	-	UTR	Soat1	ENSMUSG00000026600	0.00451209	0.00730379	0.00827683	0.00665337	0.00826136	0.00782976	0.00987872	0.00721397	0.00936263	0.00655487	0.00749819	0.00510371	0.0087978	0.0101093	0.0100015	0.00699454	0.00994805	0.00825549	0.00885954	0.0058	0.00893077	0.00850715	0.291367	0.00757687	0.00830072
chr1:158359358	chr1	158359358	-	UTR	Soat1	ENSMUSG00000026600	0.0228827	0.0229867	0.0159001	0.0124469	0.0131434	0.0190778	0.0187374	0.019761	0.0147059	0.0185049	0.0192119	0.0102024	0.0224146	0.0180988	0.0180689	0.0188266	0.0211661	0.0154494	0.017553	0.0138971	0.0235805	0.0247507	0.723777	0.0179417	0.0185462
chr1:79700645	chr1	79700645	-	UTR	Wdfy1	ENSMUSG00000073643	0.0207603	0.0481373	0.0389592	0.023007	0.00765507	0.0104575	0.0211233	0.0218057	0.0355465	0.0282674	0.0140845	0.0143541	0.023973	0.023154	0.0242334	0.0324369	0.0241875	0.020141	0.0290525	0.0177344	0.0232199	0.0339982	0.942437	0.0245276	0.0242259
chr1:88244300	chr1	88244300	-	UTR	-,Gm24148,Mir3535,Ncl,Snora75	none,ENSMUSG00000064696,ENSMUSG00000104627,ENSMUSG00000026234,ENSMUSG00000064837	0.107179	0.118713	0.138197	0.121737	0.106468	0.113861	0.130931	0.140852	0.140791	0.124502	0.127033	0.0560354	0.151052	0.12737	0.152628	0.136508	0.136374	0.135986	0.134267	0.125669	0.107854	0.147407	0.683816	0.12457	0.128286
chr1:88244305	chr1	88244305	-	UTR	-,Gm24148,Mir3535,Ncl,Snora75	none,ENSMUSG00000064696,ENSMUSG00000104627,ENSMUSG00000026234,ENSMUSG00000064837	0.0706234	0.0765627	0.0856088	0.0851997	0.0761664	0.0633101	0.0732816	0.110268	0.0810394	0.0651034	0.0793138	0.0275444	0.0918716	0.109126	0.11527	0.0864057	0.105599	0.103519	0.0893833	0.0936424	0.0741599	0.105991	0.149141	0.0787707	0.0911374
chr1:88244311	chr1	88244311	-	UTR	-,Gm24148,Mir3535,Ncl,Snora75	none,ENSMUSG00000064696,ENSMUSG00000104627,ENSMUSG00000026234,ENSMUSG00000064837	0.0462588	0.0492528	0.0547223	0.0705534	0.0362233	0.0386789	0.0346949	0.0670172	0.0550144	0.040659	0.0399209	0.0142879	0.0736755	0.0763641	0.0701432	0.062728	0.0543741	0.0710437	0.0540447	0.0443122	0.0547491	0.0836616	0.109184	0.0484542	0.059944
chr1:88246680	chr1	88246680	-	UTR	-,Gm24148,Mir3535,Ncl,Snora75	none,ENSMUSG00000064696,ENSMUSG00000104627,ENSMUSG00000026234,ENSMUSG00000064837	0.0200778	0.0364637	0.0113143	0.0283507	0.029137	0.0269582	0.0254326	0.0495472	0.0342016	0.0454512	0.0416357	0.0045045	0.00438596	0.00845447	0.00744151	0.00362319	0.00514779	0.00879873	0.00396952	0.0135566	0.00593358	0.0137676	1.14789e-06	0.0316882	0.00723486
chr2:104837085	chr2	104837085	-	Intron	Ccdc73,Eif3m	ENSMUSG00000045106,ENSMUSG00000027170	0.555556	0.511111	0.15	0.150794	0.277778	0.490741	0.222222	0.192696	0.4375	0.297619	0.5	0.0555556	0.0793651	0.108333	0.315391	0.107226	0.130952	0.202093	0.147222	0.0567633	0.175	0.087809	0.000688886	0.344183	0.133246
chr2:121154893	chr2	121154893	-	Exon	Ppip5k1	ENSMUSG00000033526	0.122054	0.046147	0.0981481	0.0219109	0.0836657	0.127605	0.125982	0.0155039	0.166667	0.0567595	0.0888889	0.0405039	0.0759254	0.0524455	0.058237	0.0664549	0.0515487	0.0314809	0.0289224	0.0490368	0.0367992	0.0787722	0.0337012	0.0866666	0.0518297
chr2:121154909	chr2	121154909	-	Exon	Ppip5k1	ENSMUSG00000033526	0.0770609	0.0371353	0.0626984	0.041351	0.0777462	0.0769928	0.0792231	0.0583333	0.0557143	0.0588235	0.105051	0.0234404	0.0325611	0.032315	0.0151593	0.0412055	0.018038	0.0199134	0.0117991	0.056105	0.0510262	0.0229505	6.30916e-05	0.0663754	0.0295012
chr2:121318605	chr2	121318605	-	UTR	Gm14018,Mfap1a	ENSMUSG00000084407,ENSMUSG00000068479	0.0130417	0.0269308	0.00941558	0.0201446	0.0291763	0.0194798	0.019618	0.0197588	0.0336851	0.0188623	0.0427502	0.0129	0.0235486	0.0239681	0.0298804	0.0279618	0.017391	0.0185521	0.0266101	0.0222852	0.0243902	0.0261649	0.982541	0.0229876	0.0230593
chr2:121318621	chr2	121318621	-	UTR	Gm14018,Mfap1a	ENSMUSG00000084407,ENSMUSG00000068479	0.0293603	0.00965016	0.0146232	0.0258919	0.0190233	0.0178744	0.021314	0.0134291	0.022665	0.0108318	0.0138778	0.00558921	0.0147502	0.0099866	0.0127655	0.0171154	0.0138611	0.0133117	0.0137311	0.00878187	0.0154936	0.0173865	0.0308743	0.0180492	0.0129793
chr2:126718578	chr2	126718578	-	UTR	-,Sppl2a	none,ENSMUSG00000027366	0.00409986	0.0124802	0.0112783	0.0233881	0.00673445	0.00584145	0.0118747	0.00988064	0.0182758	0.0120027	0.0274615	0.00788478	0.0111003	0.0129551	0.0140208	0.0238432	0.0111768	0.0133097	0.0188977	0.0206523	0.0266161	0.020242	0.244533	0.0130289	0.0164272
chr2:126718582	chr2	126718582	-	UTR	-,Sppl2a	none,ENSMUSG00000027366	0.0157774	0.0194847	0.0250482	0.0253996	0.0198505	0.0193609	0.0160992	0.0247105	0.0190559	0.0112123	0.045357	0.00877689	0.0134116	0.0121228	0.0108331	0.0118705	0.010613	0.0141191	0.0157772	0.0199887	0.0208617	0.0141984	0.0117928	0.0219415	0.0138703
chr2:126718584	chr2	126718584	-	UTR	-,Sppl2a	none,ENSMUSG00000027366	0.0126603	0.0112279	0.0193939	0.00820275	0.00234742	0.0136308	0.00417852	0.0194269	0.00775194	0.00531915	0.018277	0.0123395	0.00698019	0.019768	0.0180365	0.0104922	0.0135491	0.0172716	0.0161257	0.0172597	0.0130336	0.0121754	0.163068	0.0111288	0.0142756
chr2:126718587	chr2	126718587	-	UTR	-,Sppl2a	none,ENSMUSG00000027366	0.0228851	0.0217617	0.0164673	0.0199386	0.00678189	0.0223666	0.0187489	0.024861	0.0212853	0.0025641	0.0233338	0.0091733	0.0107076	0.0132954	0.0109939	0.012056	0.0100463	0.013813	0.0224809	0.021528	0.0198122	0.0183938	0.193539	0.0182722	0.0147546
chr2:126718593	chr2	126718593	-	UTR	-,Sppl2a	none,ENSMUSG00000027366	0.0197429	0.0266216	0.0299182	0.0162124	0.00803213	0.0197243	0.0150183	0.0255439	0.0184724	0.0196091	0.0339156	0.0232116	0.0310723	0.0347475	0.0277759	0.030407	0.0291272	0.0248405	0.0376783	0.0394101	0.02763	0.0297683	0.00230288	0.0211646	0.0305153
chr2:126718597	chr2	126718597	-	UTR	-,Sppl2a	none,ENSMUSG00000027366	0.0316473	0.0327078	0.0368278	0.0356637	0.0253306	0.0474143	0.0246701	0.0406017	0.0265739	0.0192178	0.0401162	0.025758	0.0345112	0.041742	0.0365502	0.0411485	0.0334842	0.039383	0.0421953	0.0588733	0.0348368	0.042099	0.0877695	0.0327974	0.0391438
chr2:126718599	chr2	126718599	-	UTR	-,Sppl2a	none,ENSMUSG00000027366	0.0088778	0.0156372	0.0187828	0.0169357	0.0127352	0.018996	0.0136341	0.0221938	0.0227143	0.00839576	0.0309536	0.0107602	0.0110885	0.012945	0.015154	0.0176293	0.00979371	0.0183905	0.0144352	0.0222736	0.023166	0.0208599	0.624725	0.0172597	0.0160451
chr2:126718601	chr2	126718601	-	UTR	-,Sppl2a	none,ENSMUSG00000027366	0.0244419	0.0161974	0.0127838	0.0232655	0.0447204	0.0199996	0.0328982	0.017117	0.0270985	0.0232131	0.020701	0.00678567	0.000843882	0.0051111	0.00152145	0.00315617	0.00794495	0.00559949	0.00752189	0.0101427	0.000658762	0.00827254	2.16522e-06	0.0238579	0.0052326
chr2:126718655	chr2	126718655	-	UTR	-,Sppl2a	none,ENSMUSG00000027366	0.0250513	0.0166951	0.0215696	0.00666897	0.00866844	0.0104263	0.0119627	0.0192021	0.0203392	0.00910986	0.0121059	0.0153467	0.0246556	0.0218383	0.0117059	0.017354	0.023128	0.0263199	0.0197047	0.0276341	0.0242865	0.0235856	0.010203	0.014709	0.0214145
chr2:130698382	chr2	130698382	-	Intron	4930402H24Rik,A730017L22Rik	ENSMUSG00000027309,ENSMUSG00000085566	0.666667	0.457143	0.851852	0.669444	0.574074	0.587302	0.777778	0.47619	0.857143	0.535354	0.722222	0.31746	0.75	0.663492	0.555556	0.833333	0.725589	0.662963	0.638889	0.513889	0.619048	0.454365	0.517953	0.652288	0.612235
chr2:130698750	chr2	130698750	-	Intron	4930402H24Rik,A730017L22Rik	ENSMUSG00000027309,ENSMUSG00000085566	0.000562038	0.00355994	0.00232452	0.00170031	0.00886805	0.00346891	0.0021036	0.00411344	0.00232862	0.00415582	0.00244952	0.00262974	0.00320811	0.00538362	0.0033589	0.00415525	0.00393969	0.00455295	0.00337096	0.00339368	0.00344551	0.00322768	0.515	0.00323952	0.00369692
chr2:153444087	chr2	153444087	-	UTR	Commd7	ENSMUSG00000056941	0.0771767	0.0839394	0.0637988	0.0754768	0.0620764	0.103924	0.0799613	0.081371	0.086848	0.0848227	0.0649806	0.0573574	0.0559934	0.0587568	0.044709	0.027345	0.0636411	0.0526407	0.0409753	0.0596154	0.0357384	0.0421687	9.86662e-06	0.0785796	0.0489946
chr2:154412822	chr2	154412822	-	UTR	Pxmp4	ENSMUSG00000000876	0.0342276	0.0380371	0.0229056	0.020739	0.0162713	0.0239567	0.0319701	0.0226937	0.0254933	0.0130774	0.0342818	0.0252745	0.034175	0.0276047	0.0274668	0.0381023	0.0298533	0.0255416	0.0251634	0.0351923	0.0309896	0.0291864	0.150519	0.0257867	0.0298682
chr2:154412832	chr2	154412832	-	UTR	Pxmp4	ENSMUSG00000000876	0.031073	0.043543	0.0281832	0.0370216	0.032693	0.0386767	0.0317977	0.0277476	0.0220271	0.0235585	0.0433063	0.0255021	0.0370453	0.0407199	0.0446059	0.0390937	0.0447384	0.0419896	0.0433532	0.0491477	0.036087	0.0464182	0.011919	0.0326934	0.040791
chr2:154412834	chr2	154412834	-	UTR	Pxmp4	ENSMUSG00000000876	0.0182215	0.0262001	0.0180717	0.0197701	0.0141861	0.0195276	0.0184048	0.0161143	0.0113636	0.00878191	0.0212583	0.0137299	0.0227744	0.0225315	0.0233577	0.0232933	0.0240569	0.0174684	0.0177877	0.0213559	0.0179278	0.0211675	0.0960108	0.0174455	0.0204955
chr2:154412857	chr2	154412857	-	UTR	Pxmp4	ENSMUSG00000000876	0.0131998	0.00907891	0.0113426	0.00916253	0.0158328	0.0157394	0.00825495	0.0110474	0.00914657	0.00375345	0.0115542	0.00867036	0.0117509	0.0147786	0.0171746	0.0147611	0.0132461	0.0130585	0.0136473	0.0194796	0.011196	0.0199199	0.0240679	0.0107375	0.0143348
chr2:154412895	chr2	154412895	-	UTR	Pxmp4	ENSMUSG00000000876	0.000989207	0.00212426	0.00117835	0.00140361	0.00147746	0.00197217	0.00148812	0.00107336	0.00214465	0.00142514	0.000971221	0.00348598	0.00293113	0.00394332	0.00265741	0.00481935	0.00447431	0.00569358	0.00380756	0.0036487	0.00292195	0.00583259	5.12024e-07	0.00147705	0.00401963
chr2:154412896	chr2	154412896	-	UTR	Pxmp4	ENSMUSG00000000876	0.00373036	0.00358516	0.00564407	0.00589524	0.00346922	0.00473748	0.00529158	0.00528364	0.0052492	0.00781602	0.00365426	0.00801949	0.0105984	0.0101563	0.0118322	0.00878795	0.00767853	0.0089823	0.00768818	0.0102963	0.0100314	0.0116033	1.61582e-07	0.00494147	0.00960676
chr2:164251391	chr2	164251391	-	UTR	Sdc4	ENSMUSG00000017009	0.0211423	0.019199	0.0261257	0.0293359	0.0281171	0.0372036	0.0302075	0.0347672	0.0330584	0.0232179	0.0302237	0.0543672	0.0251662	0.0198693	0.0360192	0.017934	0.0192447	0.059828	0.0331336	0.01907	0.0111111	0.0227623	0.915535	0.028418	0.0289551
chr2:173053275	chr2	173053275	-	UTR	-,Pmepa1	none,ENSMUSG00000038400	0.0521903	0.0598153	0.0470096	0.045965	0.0249789	0.0378771	0.0505552	0.0330874	0.0379433	0.0236111	0.0426635	0.0407407	0.0208333	0.0636277	0.0144928	0.0424501	0.0656566	0.0350877	0.0798044	0.121481	0.121212	0.0691193	0.0953735	0.041427	0.0613188
chr2:173053279	chr2	173053279	-	UTR	-,Pmepa1	none,ENSMUSG00000038400	0.0548309	0.0379052	0.0555694	0.0432552	0.0181431	0.024269	0.0443838	0.0342959	0.0278797	0.0266199	0.0268031	0.025641	0.0208333	0.0512821	0.0133333	0.0429125	0.0774194	0.0350877	0.0656396	0.100488	0.130303	0.0289855	0.137698	0.0358141	0.0538114
chr2:26743186	chr2	26743186	-	intergenic	Surf6	ENSMUSG00000036160	0.0111111	0.0100011	0.00719434	0.00798	0.00980355	0.00716787	0.0114603	0.0122169	0.00915398	0.0147402	0.0150062	0.0117183	0.0137429	0.0145012	0.0127207	0.0112411	0.0130608	0.00865658	0.00646628	0.0104974	0.0122735	0.00950982	0.482901	0.0105305	0.0113081
chr2:37282118	chr2	37282118	-	UTR	Rc3h2,Zbtb6	ENSMUSG00000075376,ENSMUSG00000066798	0.00766104	0.0071083	0.00780851	0.00716685	0.00862985	0.00706422	0.00510594	0.0052723	0.00268817	0.00838238	0.0066191	0.0102703	0.0214262	0.0197855	0.0164323	0.0158466	0.0169408	0.019871	0.0206553	0.0173922	0.023372	0.0271583	3.61508e-08	0.00668242	0.0190137
chr2:5715492	chr2	5715492	-	UTR	Cdc123	ENSMUSG00000039128	0.0120383	0.00999188	0.0135993	0.0111502	0.00469503	0.00743211	0.0119395	0.0196064	0.00697674	0.00776119	0.0214981	0.0110405	0.0142261	0.010565	0.0252047	0.0221309	0.0174417	0.0145875	0.0224083	0.0150629	0.0104855	0.0166481	0.0389797	0.0115172	0.0163456
chr2:91776930	chr2	91776930	-	Intron	Dgkz,Mdk	ENSMUSG00000040479,ENSMUSG00000027239	0.335875	0.465152	0.369843	0.513445	0.42967	0.45689	0.587326	0.474662	0.5	0.476328	0.448557	0.5	0.373016	0.444444	0.225397	0.344444	0.190476	0.14537	0.332576	0.269841	0.216667	0.336111	0.000807364	0.459795	0.307122
chr3:101725003	chr3	101725003	-	Exon	Slc22a15	ENSMUSG00000033147	0.0613836	0.0246914	0.0577047	0.117784	0.0380952	0.104233	0.0626294	0.0464471	0.0458464	0.114683	0.0214634	0.0726087	0.116154	0.0846792	0.0814183	0.0665842	0.0968781	0.0794092	0.0597644	0.08076	0.0803463	0.0836969	0.110503	0.0631782	0.0820272
chr3:101725669	chr3	101725669	-	Exon	Slc22a15	ENSMUSG00000033147	0.111111	0.102418	0.0593434	0.0694617	0.0485348	0.0927013	0.0772947	0.0703704	0.197619	0.0548387	0.0133333	0.0327211	0.0649423	0.0734551	0.131248	0.109876	0.0480262	0.0572969	0.0932958	0.057305	0.0566194	0.0550534	0.530607	0.0815479	0.0708945
chr3:101725672	chr3	101725672	-	Exon	Slc22a15	ENSMUSG00000033147	0.0787037	0.0698006	0.0643723	0.0917949	0.0579365	0.116307	0.10404	0.127923	0.0851449	0.105834	0.0895749	0.0194721	0.0394981	0.0572404	0.0336826	0.0503552	0.0552288	0.0658857	0.0383551	0.0975355	0.102545	0.0392465	0.00233029	0.0901301	0.0544586
chr3:116447000	chr3	116447000	-	UTR	Agl	ENSMUSG00000033400	0.0112462	0.0112782	0.00413292	0.0106229	0.0115181	0.00711728	0.00727828	0.00435508	0.00884973	0.00696442	0.00526406	0.00232155	0.010909	0.0132161	0.00945271	0.00740786	0.0127742	0.00799218	0.00693345	0.0104888	0.0132945	0.0138753	0.195541	0.00805702	0.00987871
chr3:116447014	chr3	116447014	-	UTR	Agl	ENSMUSG00000033400	0.0115805	0.0127306	0.0151865	0.0169717	0.0137411	0.00937344	0.0122161	0.0113137	0.0107615	0.0146119	0.00699913	0.0113951	0.0182616	0.0169653	0.0158931	0.0146059	0.0181666	0.0125194	0.0271914	0.0145254	0.0143812	0.0156823	0.0156316	0.0123169	0.0163261
chr3:116447015	chr3	116447015	-	UTR	Agl	ENSMUSG00000033400	0.184336	0.116375	0.0886462	0.140852	0.142215	0.159867	0.126936	0.111621	0.147076	0.109796	0.141286	0.128254	0.148434	0.202919	0.195978	0.165006	0.204816	0.212698	0.183977	0.200823	0.188021	0.22336	0.000212973	0.133546	0.186753
chr3:116447036	chr3	116447036	-	UTR	Agl	ENSMUSG00000033400	0.00171821	0.00252525	0.0010582	0.00114155	0.00226363	0.00243902	0.00179211	0.00275686	0.00170648	0.003861	0.00282486	0.000373692	0.00261355	0.00323198	0.00138756	0.00393658	0.00199557	0.00182961	0.00636701	0.00256812	0.00463377	0.00274212	0.227126	0.00218975	0.00287996
chr3:116447037	chr3	116447037	-	UTR	Agl	ENSMUSG00000033400	0.00899356	0.00361886	0.00646176	0.00712973	0.00998814	0.00890486	0.00525603	0.0147068	0.00725073	0.0115472	0.00706132	0.00217168	0.00387425	0.010912	0.00656024	0.00483603	0.00674481	0.00699601	0.00487349	0.0047973	0.0119712	0.00560513	0.138611	0.00826537	0.00630383
chr3:116447040	chr3	116447040	-	UTR	Agl	ENSMUSG00000033400	0.0192836	0.0185961	0.0219138	0.0143256	0.0125615	0.0174512	0.0232627	0.0106662	0.0190293	0.0185912	0.00651028	0.00973619	0.0155307	0.0128861	0.00977527	0.0103355	0.00931707	0.0124288	0.0104623	0.0146965	0.0111933	0.0142288	0.0102602	0.0165629	0.0118719
chr3:116447046	chr3	116447046	-	UTR	Agl	ENSMUSG00000033400	0.0614311	0.0721279	0.0758548	0.0706251	0.0744354	0.0560556	0.0496991	0.0583282	0.0664221	0.0554138	0.0468571	0.0270455	0.0372886	0.0471649	0.0336737	0.0477257	0.0451483	0.037279	0.0461055	0.0394805	0.0586949	0.052875	0.000112639	0.0624773	0.0429529
chr3:116447064	chr3	116447064	-	UTR	Agl	ENSMUSG00000033400	0.637301	0.636213	0.611349	0.599664	0.61412	0.658708	0.629088	0.718473	0.719909	0.688053	0.748117	0.519504	0.799105	0.76965	0.767439	0.794259	0.774539	0.769991	0.793217	0.771142	0.768899	0.757868	0.00355777	0.660091	0.753238
chr3:68876636	chr3	68876636	-	UTR	Kpna4	ENSMUSG00000027782	0.0658582	0.104002	0.0731672	0.0801587	0.0400412	0.0793482	0.0804959	0.0843115	0.113479	0.09873	0.0833101	0.0222222	0.0792038	0.0721872	0.089899	0.0629984	0.140741	0.138584	0.131478	0.0144928	0.121707	0.06185	0.842078	0.0820819	0.085033
chr3:79260379	chr3	79260379	-	UTR	-,Fnip2,Gm17359	none,ENSMUSG00000061175,ENSMUSG00000091685	0.00629414	0.00228311	0.00321332	0.0166065	0.0105096	0.00677264	0.00258398	0.0063857	0.0166286	0.00464661	0.00805667	0.00552116	0.0108795	0.0162364	0.0149089	0.00587958	0.0067124	0.0109241	0.0137295	0.0108413	0.0151634	0.0147969	0.0645051	0.00763462	0.0114176
chr3:96382190	chr3	96382190	-	UTR	Gm16253,Polr3gl	ENSMUSG00000087610,ENSMUSG00000028104	0.00490283	0.00618631	0.00809639	0.00252724	0.00439678	0.00334842	0.00214284	0.00472395	0.00383904	0.00455219	0.00670764	0.00257858	0.00616058	0.00575691	0.00628832	0.00345539	0.00495404	0.00595391	0.00598263	0.00454411	0.00507409	0.00459454	0.587028	0.00467487	0.00503119
chr4:107901655	chr4	107901655	-	intergenic	Zyg11b	ENSMUSG00000034636	0.0230925	0.0107441	0.0137121	0.0139972	0.0100877	0.0208891	0.0065242	0.0221873	0.0215807	0.0113312	0.024842	0.0156552	0.0117612	0.0269022	0.0190491	0.0178562	0.0135186	0.0150104	0.0199977	0.0210726	0.0244285	0.0225086	0.285405	0.0162717	0.0188873
chr4:116224779	chr4	116224779	-	Exon	Gm12953,Tmem69	ENSMUSG00000087299,ENSMUSG00000055900	0.0107018	0.0423264	0.0437304	0.0275435	0.0307244	0.0332799	0.0397518	0.0329756	0.0276272	0.0413851	0.0329275	0.029556	0.0527678	0.0478792	0.0711327	0.0600916	0.0789892	0.0594386	0.0479162	0.0612711	0.0775831	0.0655106	6.02045e-05	0.0329976	0.0592851
chr4:116224788	chr4	116224788	-	Exon	Gm12953,Tmem69	ENSMUSG00000087299,ENSMUSG00000055900	0.0178022	0.0148102	0.0247867	0.0190988	0.00884336	0.00768818	0.0280741	0.0223132	0.0175545	0.0165148	0.016271	0.0240469	0.0635344	0.0447522	0.0459934	0.0530356	0.0803847	0.0332086	0.0652941	0.0410642	0.0451311	0.0673141	3.5362e-06	0.0176143	0.0512508
chr4:116224840	chr4	116224840	-	Exon	Gm12953,Tmem69	ENSMUSG00000087299,ENSMUSG00000055900	0.00557135	0.00649479	0.00805189	0.0124612	0.00530829	0.00698633	0.0100344	0.00788338	0.01019	0.00871568	0.00682437	0.00202822	0.00547671	0.001443	0.00254913	0.00158353	0.00183315	0.00522359	0.0023411	0.00441386	0.00485181	0.00446473	9.68693e-06	0.00804742	0.00329171
chr4:116224841	chr4	116224841	-	Exon	Gm12953,Tmem69	ENSMUSG00000087299,ENSMUSG00000055900	0.0033532	0.00395576	0.0058359	0.00179247	0.00246956	0.00477711	0.00164933	0.00302727	0.00168067	0.0035495	0.00284217	0.00259589	0.00478675	0.00622567	0.00752702	0.00675905	0.00724617	0.00293372	0.00755922	0.00165017	0.00281164	0.0039981	0.0374036	0.00317572	0.00491758
chr4:116224850	chr4	116224850	-	Exon	Gm12953,Tmem69	ENSMUSG00000087299,ENSMUSG00000055900	0.0090936	0.0131332	0.00946513	0.00805004	0.00812749	0.00788499	0.0113341	0.00863701	0.00696184	0.00942609	0.00732977	0.00546066	0.00692538	0.00810447	0.0051875	0.00491887	0.00873365	0.00850491	0.00893107	0.00938966	0.00816061	0.00547996	0.0271802	0.00904029	0.00725425
chr4:116224858	chr4	116224858	-	Exon	Gm12953,Tmem69	ENSMUSG00000087299,ENSMUSG00000055900	0.00342915	0.00228261	0.00527583	0.00771022	0.00272805	0.00550104	0.00435317	0.00306697	0.00346934	0.00171669	0.00638065	0.00698472	0.010281	0.0159624	0.0137336	0.0124279	0.0150473	0.00885878	0.0102028	0.0123962	0.00835551	0.0114596	6.58671e-07	0.00417397	0.0114282
chr4:116224882	chr4	116224882	-	Exon	Gm12953,Tmem69	ENSMUSG00000087299,ENSMUSG00000055900	0.00365023	0.0054988	0.00459059	0.00606334	0.00281191	0.00497918	0.00367663	0.00261	0.00739039	0.00808992	0.00617919	0.00355983	0.00448121	0.0045909	0.00277704	0.0072667	0.0035022	0.00572383	0.0047339	0.00780334	0.00425832	0.00447028	0.765664	0.00504911	0.00483341
chr4:116224887	chr4	116224887	-	Exon	Gm12953,Tmem69	ENSMUSG00000087299,ENSMUSG00000055900	0.00623475	0.00731115	0.00680135	0.00832725	0.00726822	0.00725118	0.00479712	0.00496438	0.00277969	0.00354641	0.00217704	0.00800609	0.00928189	0.0158106	0.0139119	0.00957784	0.0100136	0.0136349	0.0147846	0.00835502	0.0118579	0.00912757	2.41054e-05	0.00558714	0.0113056
chr4:116224888	chr4	116224888	-	Exon	Gm12953,Tmem69	ENSMUSG00000087299,ENSMUSG00000055900	0.0142469	0.0168454	0.0214748	0.0252322	0.0219003	0.0250394	0.0163711	0.0225135	0.0128036	0.019083	0.0171582	0.00962832	0.0192729	0.0199715	0.0122736	0.0139453	0.0102454	0.0216836	0.0204663	0.0153883	0.0178615	0.0216617	0.154123	0.0193335	0.0165817
chr4:116225392	chr4	116225392	-	UTR	Gm12953,Gpbp1l1,Tmem69	ENSMUSG00000087299,ENSMUSG00000034042,ENSMUSG00000055900	0.00824491	0.00955585	0.0107005	0.00874388	0.0125969	0.0129542	0.0105532	0.0105808	0.00883874	0.0104131	0.0057733	0.00357457	0.00913417	0.00625789	0.00707527	0.00636688	0.00793832	0.00463096	0.00646349	0.00630648	0.00631822	0.0072119	0.000202268	0.00990503	0.00647983
chr4:116225396	chr4	116225396	-	UTR	Gm12953,Gpbp1l1,Tmem69	ENSMUSG00000087299,ENSMUSG00000034042,ENSMUSG00000055900	0.0108849	0.00949294	0.0114901	0.0102268	0.0146985	0.0125401	0.00992793	0.0116021	0.0113006	0.0112218	0.00896207	0.00482281	0.00948422	0.00886126	0.00903392	0.00770149	0.00956178	0.00840635	0.010513	0.00900418	0.00722837	0.00678884	0.000467868	0.0111225	0.00830966
chr4:116225401	chr4	116225401	-	UTR	Gm12953,Gpbp1l1,Tmem69	ENSMUSG00000087299,ENSMUSG00000034042,ENSMUSG00000055900	0.0144459	0.011375	0.0151805	0.0129523	0.0177911	0.0186586	0.0146487	0.0156558	0.0138795	0.014709	0.0127989	0.00844379	0.0120341	0.0125372	0.012809	0.012604	0.0128225	0.0128538	0.0123894	0.0125136	0.0113937	0.0126434	0.00206334	0.0147359	0.012095
chr4:116225413	chr4	116225413	-	UTR	Gm12953,Gpbp1l1,Tmem69	ENSMUSG00000087299,ENSMUSG00000034042,ENSMUSG00000055900	0.0214734	0.0191107	0.026964	0.0250906	0.0256791	0.0243432	0.0253387	0.0222251	0.0257717	0.0265927	0.0197927	0.0174362	0.0263004	0.0244838	0.0279931	0.0277451	0.0267186	0.0252403	0.0271639	0.0276648	0.0228797	0.0202779	0.437897	0.0238529	0.0249004
chr4:116225417	chr4	116225417	-	UTR	Gm12953,Gpbp1l1,Tmem69	ENSMUSG00000087299,ENSMUSG00000034042,ENSMUSG00000055900	0.00640233	0.00452824	0.00764309	0.00843768	0.0068238	0.00860832	0.00747385	0.00780789	0.00841532	0.00725974	0.010461	0.00620438	0.00928397	0.00909457	0.0106006	0.0106283	0.0105108	0.00997843	0.0108781	0.0127573	0.00940401	0.0115019	0.00162112	0.00762375	0.0100766
chr4:116225422	chr4	116225422	-	UTR	Gm12953,Gpbp1l1,Tmem69	ENSMUSG00000087299,ENSMUSG00000034042,ENSMUSG00000055900	0.0104891	0.00683323	0.0078417	0.00909203	0.0055344	0.0103956	0.00899646	0.0096946	0.00611797	0.0105567	0.00846041	0.00666799	0.00966577	0.00841521	0.00793213	0.0072898	0.00780943	0.00890892	0.00900306	0.00958712	0.00885025	0.0103847	0.942931	0.00854657	0.00859222
chr4:116375625	chr4	116375625	-	UTR	Mmachc,Prdx1	ENSMUSG00000028690,ENSMUSG00000028691	0.0114769	0.00453704	0.0123747	0.0052356	0.0120488	0.00494858	0.00283688	0.00810647	0.013798	0.00200803	0.00177305	0.0025641	0.0119236	0.0092303	0.00716927	0.0154407	0.00722664	0.01574	0.00560356	0.00352162	0.0115873	0.00824631	0.371137	0.00719492	0.00893213
chr4:129031031	chr4	129031031	-	UTR	Zbtb8a,Zbtb8os	ENSMUSG00000028807,ENSMUSG00000057572	0.130914	0.0588427	0.146649	0.117297	0.084238	0.135328	0.0390492	0.0939968	0.173077	0.152603	0.15894	0.0865317	0.104497	0.106976	0.0799552	0.133958	0.105974	0.13812	0.104359	0.106266	0.106402	0.107413	0.480803	0.117358	0.107314
chr4:132014891	chr4	132014891	-	UTR	Med18	ENSMUSG00000066042	0.0136767	0.0112958	0.0129012	0.0117082	0.00607021	0.00630954	0.00639914	0.0099823	0.00713799	0.00833921	0.004884	0.00663748	0.00542262	0.00721399	0.00781604	0.00618071	0.0101675	0.00654206	0.0077704	0.00644019	0.00887727	0.00707034	0.109774	0.00897312	0.00728533
chr4:132014893	chr4	132014893	-	UTR	Med18	ENSMUSG00000066042	0.0045045	0.00162602	0.00683403	0.00245991	0.00275482	0.00311526	0.00221484	0.00478469	0.00285714	0.00511838	0.00655831	0.00153646	0.00604962	0.00210699	0.00465557	0.00681516	0.00433081	0.00514364	0.00777607	0.00647838	0.00608752	0.00703874	0.101422	0.00389345	0.00527445
chr4:132281917	chr4	132281917	-	UTR	Eya3,Xkr8	ENSMUSG00000028886,ENSMUSG00000037752	0.0176762	0.00294985	0.00421941	0.00484689	0.00740741	0.00653595	0.0148459	0.00189394	0.00729927	0.00767273	0.00601852	0.00765208	0.00853686	0.00868992	0.00768265	0.00896508	0.00515972	0.0226537	0.014386	0.0184835	0.00774827	0.00792091	0.144261	0.00739691	0.0107162
chr4:133645738	chr4	133645738	-	Exon	Cd52,Crybg2	ENSMUSG00000000682,ENSMUSG00000012123	0.0339686	0.036673	0.0391818	0.0365584	0.0392473	0.0315272	0.0421655	0.0301614	0.0359796	0.0388082	0.0520416	0.0176749	0.0272389	0.0238806	0.0270263	0.0247154	0.0226242	0.0258972	0.020781	0.0225165	0.0289445	0.0216124	1.13292e-06	0.0378466	0.0239011
chr4:133645742	chr4	133645742	-	Exon	Cd52,Crybg2	ENSMUSG00000000682,ENSMUSG00000012123	0.0535876	0.0455931	0.0576413	0.0599298	0.0550064	0.0579626	0.0526919	0.0413858	0.0431547	0.0325623	0.0518776	0.0168858	0.0328256	0.0210968	0.0264885	0.0323994	0.0225808	0.028974	0.0252438	0.0294069	0.0279818	0.0278801	1.05762e-07	0.0501266	0.026524
chr4:133645748	chr4	133645748	-	Exon	Cd52,Crybg2	ENSMUSG00000000682,ENSMUSG00000012123	0.0103191	0.0175596	0.0174934	0.0190601	0.0100512	0.00961298	0.0130138	0.0147309	0.0139428	0.00601856	0.0155347	0.0075599	0.014888	0.0129108	0.0155341	0.0116337	0.0161046	0.00956888	0.00887203	0.0132405	0.0100102	0.0152489	0.487364	0.0133943	0.0123247
chr4:147199082	chr4	147199082	-	UTR	-,Rps19-ps3,Zfp933	none,ENSMUSG00000080059,ENSMUSG00000059423	0.0045045	0.0047619	0.00600601	0.00506096	0.00411523	0.00421941	0.00681726	0.0163348	0.00595238	0.00865801	0.00828445	0.0100515	0.00676819	0.00736831	0.0071953	0.0101033	0.0117103	0.00649598	0.00482058	0.0103165	0.020418	0.012591	0.0862879	0.00679227	0.00980354
chr4:147199108	chr4	147199108	-	UTR	-,Rps19-ps3,Zfp933	none,ENSMUSG00000080059,ENSMUSG00000059423	0.0555556	0.0592885	0.151282	0.13373	0.193651	0.0611111	0.114025	0.0651515	0.176923	0.0555556	0.0416667	0.0475	0.106662	0.111256	0.141863	0.160725	0.103282	0.0493902	0.111908	0.0826673	0.14429	0.130889	0.711437	0.100722	0.108221
chr4:147199127	chr4	147199127	-	UTR	Rps19-ps3,Zfp933	ENSMUSG00000080059,ENSMUSG00000059423	0.16049	0.137548	0.1185	0.0687938	0.104365	0.102217	0.152513	0.210685	0.130252	0.120726	0.101136	0.103381	0.151723	0.187833	0.187036	0.169536	0.165828	0.11293	0.159685	0.155004	0.113911	0.125027	0.174816	0.12793	0.148354
chr4:148842470	chr4	148842470	-	UTR	-,Nmnat1	none,ENSMUSG00000028992	0.0045045	0.00801155	0.00456258	0.00277778	0.00485625	0.0126622	0.0101036	0.00944187	0.00195312	0.00219298	0.00764256	0.0047619	0.00297619	0.0189466	0.010189	0.0147881	0.00889315	0.0221194	0.00248756	0.0141642	0.0217892	0.0134606	0.0205797	0.00624628	0.0122342
chr4:21685175	chr4	21685175	-	UTR	Ccnc,Tstd3	ENSMUSG00000028252,ENSMUSG00000028251	0.0196681	0.0145603	0.0198677	0.0218446	0.0187603	0.0238582	0.0132543	0.0125689	0.017079	0.0218723	0.0170718	0.0187353	0.0266588	0.0299876	0.0416004	0.0236598	0.0239156	0.021827	0.0303757	0.0244952	0.0323305	0.0327722	0.000328418	0.0182187	0.0278507
chr4:46128079	chr4	46128079	-	UTR	Gm23250,Tmod1,Tstd2	ENSMUSG00000088069,ENSMUSG00000028328,ENSMUSG00000035495	0.00595976	0.00552079	0.0073234	0.00833541	0.00839682	0.00713402	0.00737908	0.00485557	0.00669978	0.00552614	0.00770642	0.00756475	0.0108896	0.0163987	0.0152873	0.0144824	0.0139731	0.017038	0.0152918	0.0190576	0.0145998	0.0195847	3.61291e-07	0.00680338	0.0149243
chr5:105243957	chr5	105243957	-	Exon	Zfp951	ENSMUSG00000072774	0.0228261	0.0261438	0.0384921	0.0189198	0.015625	0.030316	0.0348093	0.0182025	0.0169492	0.0290179	0.00617284	0.0351852	0.0623292	0.0277778	0.0426487	0.0138889	0.0365961	0.0563109	0.0679012	0.0151515	0.0429012	0.0278261	0.018811	0.0234068	0.0389561
chr5:113516854	chr5	113516854	-	UTR	2900026A02Rik	ENSMUSG00000051339	0.0128205	0.0296323	0.0121574	0.00606061	0.00653595	0.0344186	0.0387597	0.0310451	0.0111111	0.0390361	0.054942	0.0276361	0.0665205	0.0333333	0.0470035	0.00666667	0.0215278	0.0710824	0.020202	0.025641	0.130435	0.0676768	0.0750428	0.0251381	0.0470659
chr5:115747617	chr5	115747617	-	UTR	Coq5,Dynll1,Gm13830	ENSMUSG00000041733,ENSMUSG00000009013,ENSMUSG00000086368	0.00303234	0.0071733	0.0108806	0.00576251	0.00480813	0.00602642	0.00233544	0.00660202	0.00884782	0.00514677	0.0015949	0.00444095	0.00704636	0.00755531	0.00798736	0.00730422	0.0058692	0.00610601	0.00827167	0.00780358	0.00682006	0.00921657	0.125118	0.00565548	0.00712921
chr5:115747618	chr5	115747618	-	UTR	Coq5,Dynll1,Gm13830	ENSMUSG00000041733,ENSMUSG00000009013,ENSMUSG00000086368	0.0198577	0.0238163	0.0180151	0.0172084	0.0225922	0.0139545	0.0145577	0.0243617	0.0197929	0.0235853	0.0200047	0.0122139	0.0203661	0.0190443	0.0197446	0.0192945	0.0208614	0.0204757	0.015857	0.0157619	0.0211723	0.0215787	0.469047	0.0197951	0.018761
chr5:121974262	chr5	121974262	-	UTR	Adam1a,Gm42878,Mapkapk5,Tmem116	ENSMUSG00000072647,ENSMUSG00000105340,ENSMUSG00000029454,ENSMUSG00000029452	0.0152674	0.00426839	0.0120651	0.0115115	0.0066367	0.00703517	0.00624339	0.00859063	0.00499903	0.00783316	0.00937969	0.0124299	0.0133243	0.0104432	0.0138448	0.0112957	0.0110681	0.00830256	0.00929177	0.00733838	0.00942249	0.0104016	0.0850132	0.00853002	0.0106512
chr5:122052937	chr5	122052937	-	UTR	Acad12	ENSMUSG00000042647	0.0330046	0.0314046	0.0363072	0.0353634	0.0309439	0.0355585	0.0264153	0.0294592	0.027537	0.0234496	0.0278929	0.0294757	0.0516287	0.0283218	0.0256554	0.0497781	0.0313087	0.0378702	0.0450447	0.0444335	0.0467764	0.061216	0.0100469	0.0306669	0.0410463
chr5:122052955	chr5	122052955	-	UTR	Acad12	ENSMUSG00000042647	0.0215769	0.0304751	0.0235341	0.0294691	0.0253733	0.0255469	0.0289595	0.0293783	0.0198363	0.0125443	0.0214357	0.0094933	0.014952	0.0238657	0.0221455	0.0226962	0.0181491	0.0221395	0.0277898	0.0257517	0.0226604	0.0259866	0.210806	0.0243754	0.0214209
chr5:122052970	chr5	122052970	-	UTR	Acad12	ENSMUSG00000042647	0.0117183	0.024028	0.0178923	0.0175403	0.0136983	0.0209235	0.0173978	0.0214226	0.0085855	0.0184647	0.026109	0.0104575	0.0124034	0.0284532	0.0205474	0.0176995	0.0205138	0.0212649	0.0179286	0.0220753	0.0189719	0.0272068	0.435083	0.01798	0.0197747
chr5:124192075	chr5	124192075	-	Exon	-,Rsrc2	none,ENSMUSG00000029422	0.00152555	0.0011841	0.00212214	0.00185507	0.000548246	0.0013471	0.00341307	0.00305199	0.00353869	0.00114351	0.00142653	0.00154975	0.000945646	0.00235979	0.00309297	0.00417806	0.00266105	0.00366887	0.00310698	0.00292111	0.0020882	0.0045813	0.053901	0.00192327	0.00283216
chr5:124192076	chr5	124192076	-	Exon	-,Rsrc2	none,ENSMUSG00000029422	0.0109405	0.00716506	0.0171359	0.0118968	0.0113357	0.0170922	0.0146563	0.010232	0.0148607	0.0170575	0.00930981	0.00921312	0.0172724	0.0133556	0.0154465	0.0154277	0.0111747	0.013797	0.0131295	0.0115781	0.0145826	0.0134332	0.628629	0.0128802	0.0134919
chr5:138583293	chr5	138583293	-	UTR	Zfp113	ENSMUSG00000037007	0.00352168	0.0015015	0.00760298	0.00293255	0.00759462	0.00200803	0.00500768	0.00481029	0.00806452	0.00530255	0.00185185	0.00689504	0.00740185	0.00735708	0.0082192	0.00664873	0.00912276	0.00571119	0.00833301	0.00728572	0.0107539	0.00802803	0.00094534	0.00456348	0.00779604
chr5:151405933	chr5	151405933	-	intergenic	Gm43597,Gm43598,N4bp2l2	ENSMUSG00000107096,ENSMUSG00000106927,ENSMUSG00000029655	0.00199601	0.00246914	0.00205761	0.00852722	0.0042735	0.0075678	0.00311526	0.00797068	0.00520833	0.00595409	0.0042735	0.00551876	0.00786982	0.0115139	0.0101854	0.00219289	0.00944337	0.0114668	0.00437984	0.00533109	0.00589185	0.00729665	0.0430694	0.00485574	0.00737185
chr5:151440842	chr5	151440842	-	UTR	N4bp2l2	ENSMUSG00000029655	0.00228311	0.00345423	0.00625	0.00433362	0.0113291	0.0151736	0.00134953	0.001221	0.00579882	0.0100705	0.00502484	0.000520833	0.00312409	0.0019304	0.000983691	0.00603216	0.00295167	0.00107182	0.00196767	0.00390068	0.00361775	0.00273974	0.0266749	0.00602622	0.00262186
chr5:151440844	chr5	151440844	-	UTR	N4bp2l2	ENSMUSG00000029655	0.00427978	0.00932845	0.00347956	0.00562588	0.00535745	0.00574713	0.00266667	0.00823076	0.0033557	0.0114703	0.00924711	0.00622994	0.00830265	0.0110016	0.00725783	0.00662931	0.00795967	0.00812469	0.0115523	0.00795903	0.00385234	0.00606528	0.194067	0.00625353	0.00772133
chr5:151450877	chr5	151450877	-	Exon	N4bp2l2	ENSMUSG00000029655	0.094134	0.0808186	0.108993	0.0796838	0.0845102	0.0731507	0.0749934	0.105809	0.0766386	0.0828726	0.0757535	0.0645936	0.0945931	0.100714	0.0786368	0.101513	0.109341	0.101758	0.0950584	0.0902878	0.119414	0.117691	0.0564403	0.0852143	0.0976001
chr5:37052028	chr5	37052028	-	Intron	-,D5Ertd579e	none,ENSMUSG00000029190	0.258333	0.716667	0.575926	0.563095	0.555556	0.5	0.529101	0.416667	0.464286	0.539474	0.500754	0.216117	0.405449	0.328129	0.261905	0.236643	0.470679	0.288084	0.384454	0.340278	0.198864	0.22098	0.000118734	0.510896	0.304689
chr5:66088180	chr5	66088180	-	Intron	-,Pds5a	none,ENSMUSG00000029202	0.936837	0.965635	0.883538	0.907665	0.908642	0.946102	0.919775	0.934199	0.971259	0.967998	0.952837	0.340476	0.476077	0.334153	0.296215	0.357375	0.354604	0.365786	0.298039	0.374554	0.495116	0.441168	9.73222e-17	0.935862	0.375778
chr6:122689292	chr6	122689292	-	Exon	Slc2a3	ENSMUSG00000003153	0.00982214	0.0111287	0.0127145	0.0124562	0.011114	0.0104543	0.0111803	0.0114353	0.00818405	0.0111423	0.00885512	0.0107335	0.0127824	0.014494	0.0128752	0.0134296	0.013924	0.0154734	0.0178786	0.0166432	0.0149773	0.0147272	7.33319e-05	0.0107715	0.014358
chr6:122689295	chr6	122689295	-	Exon	Slc2a3	ENSMUSG00000003153	0.00451788	0.00482313	0.00594167	0.00536156	0.00636024	0.00650896	0.00571155	0.00479471	0.0051166	0.00448255	0.00656132	0.00667074	0.0060106	0.0145147	0.0113327	0.0115617	0.0109935	0.0105811	0.0108404	0.0139617	0.0109151	0.00958514	3.21473e-06	0.00547093	0.0106334
chr6:122689308	chr6	122689308	-	Exon	Slc2a3	ENSMUSG00000003153	0.00364217	0.00279213	0.00371399	0.00358931	0.00209483	0.00331125	0.00518576	0.000880312	0.00336341	0.0030803	0.0041543	0.00572627	0.00717434	0.00578131	0.00829958	0.0078652	0.00636926	0.00650552	0.00807261	0.00658082	0.00835535	0.00792507	3.33715e-08	0.00325525	0.00715048
chr6:126879673	chr6	126879673	-	Exon	Gm17808,Rad51ap1	ENSMUSG00000106878,ENSMUSG00000030346	0.0138999	0.00297619	0.026926	0.0251732	0.0045045	0.0261493	0.0300131	0.0142713	0.0649371	0.0554842	0.0206176	0.0308852	0.0247748	0.0276305	0.0287751	0.0274335	0.0286488	0.0418001	0.0370319	0.0306855	0.0246168	0.0272841	0.507712	0.0259048	0.0299606
chr6:30432039	chr6	30432039	-	UTR	Tmem209	ENSMUSG00000029782	0.0877336	0.0726228	0.0434748	0.0810347	0.0940837	0.0551207	0.0686508	0.028259	0.122246	0.0640409	0.0607211	0.10988	0.133267	0.129352	0.131605	0.100679	0.152156	0.115807	0.1266	0.157284	0.111933	0.169591	7.90137e-06	0.0707262	0.130741
chr6:56728448	chr6	56728448	-	UTR	Kbtbd2	ENSMUSG00000059486	0.00681952	0.00620061	0.00760691	0.0108519	0.00776747	0.00795491	0.00695164	0.00411439	0.00622407	0.00707472	0.00576309	0.0010929	0.00226217	0.0093719	0.00932678	0.00821311	0.00876292	0.00579103	0.00782747	0.00497415	0.00524395	0.00393897	0.350243	0.00702993	0.00607321
chr7:129131157	chr7	129131157	-	UTR	Gga2,Gm44987	ENSMUSG00000030872,ENSMUSG00000108511	0.0159361	0.0165395	0.00842407	0.0103052	0.00393197	0.00795535	0.011062	0.00789304	0.016896	0.0103322	0.0122202	0.00645929	0.00955465	0.00989539	0.014672	0.00912177	0.0123757	0.00820334	0.0121045	0.00998194	0.0126593	0.0111667	0.737592	0.0110451	0.0105631
chr7:129131161	chr7	129131161	-	UTR	Gga2,Gm44987	ENSMUSG00000030872,ENSMUSG00000108511	0.0296264	0.0258605	0.027468	0.023688	0.0189942	0.0144167	0.0111591	0.0183203	0.0160057	0.0146682	0.0200335	0.0143963	0.02293	0.0216583	0.0270241	0.0190201	0.0238896	0.0171732	0.0207887	0.0282344	0.0307019	0.0239811	0.258907	0.0200219	0.0227089
chr7:129131165	chr7	129131165	-	UTR	Gga2,Gm44987	ENSMUSG00000030872,ENSMUSG00000108511	0.0104466	0.00398362	0.00357072	0.00492976	0.005025	0.00472313	0.00405602	0.00307955	0.00309598	0.008247	0.0114715	0.00464161	0.0085087	0.00480602	0.0116338	0.00487235	0.00586624	0.00533838	0.00597068	0.00845221	0.00570359	0.00529058	0.496459	0.00569353	0.0064622
chr7:129131175	chr7	129131175	-	UTR	Gga2,Gm44987	ENSMUSG00000030872,ENSMUSG00000108511	0.0116507	0.00600345	0.00756634	0.0105696	0.00865441	0.00472069	0.0098601	0.0040834	0.00907388	0.0154974	0.0120562	0.00791825	0.00675153	0.00498526	0.00879684	0.00534279	0.011014	0.00559024	0.00705368	0.00961486	0.00982854	0.00796905	0.267576	0.00906692	0.00771501
chr7:147996951	chr7	147996951	-	UTR	Zfp941	ENSMUSG00000060314	0.129068	0.0773314	0.0785534	0.0777055	0.035461	0.0818309	0.045977	0.0309829	0.0753106	0.0636174	0.0505466	0.0343434	0.0587992	0.0364661	0.061161	0.0365841	0.0506026	0.0277435	0.0172346	0.0190199	0.0406707	0.063329	0.00996627	0.0678532	0.0405413
chr7:147996955	chr7	147996955	-	UTR	Zfp941	ENSMUSG00000060314	0.060202	0.00793651	0.010101	0.00617284	0.0281746	0.0148148	0.0334325	0.0147243	0.0386905	0.00877193	0.015873	0.0122324	0.0544238	0.0246242	0.0297674	0.0138672	0.0257516	0.0447782	0.03005	0.0375854	0.0265682	0.0236185	0.237105	0.0217176	0.0293879
chr7:147996976	chr7	147996976	-	UTR	Zfp941	ENSMUSG00000060314	0.105238	0.097263	0.0512626	0.119535	0.115785	0.0950855	0.116382	0.0464463	0.0526316	0.108631	0.103408	0.0413534	0.0714599	0.0967694	0.0936638	0.0772185	0.0665025	0.104731	0.110618	0.103699	0.0331783	0.065479	0.258775	0.0919698	0.0786066
chr7:150403081	chr7	150403081	-	Exon	Kcnq1,Kcnq1ot1	ENSMUSG00000009545,ENSMUSG00000101609	0.133333	0.185606	0.0929487	0.259259	0.163889	0.0555556	0.25	0.144444	0.333333	0.477778	0.194444	0.403922	0.187406	0.164103	0.314863	0.245195	0.253019	0.138928	0.438492	0.238749	0.297076	0.270893	0.200847	0.208236	0.268422
chr7:151764635	chr7	151764635	-	UTR	Fadd,Faddos	ENSMUSG00000031077,ENSMUSG00000073778	0.0244456	0.0178139	0.0118548	0.0201655	0.0155475	0.0210328	0.0275133	0.020619	0.0126834	0.0243089	0.0154407	0.00924089	0.0153725	0.0224374	0.0179635	0.0213125	0.0216673	0.021394	0.0183915	0.0193062	0.0198218	0.0214879	0.886826	0.0192205	0.0189451
chr7:16820338	chr7	16820338	-	UTR	C5ar2,Gm26473	ENSMUSG00000074361,ENSMUSG00000080413	0.0396478	0.0387858	0.0371797	0.0462524	0.0418774	0.045094	0.0402488	0.0437697	0.0427052	0.0460041	0.0438039	0.0227991	0.0363618	0.0411931	0.0363464	0.0470215	0.0500817	0.032899	0.0435635	0.0346818	0.0453747	0.0445408	0.286364	0.0423062	0.039533
chr7:20091437	chr7	20091437	-	UTR	Bloc1s3,Trappc6a	ENSMUSG00000057667,ENSMUSG00000002043	0.0473773	0.0701841	0.0737961	0.0573531	0.0402574	0.0700632	0.0584169	0.028663	0.0599856	0.0806282	0.0521169	0.03015	0.0503154	0.0706186	0.05731	0.0677543	0.0566637	0.0499846	0.0526411	0.0508049	0.0756292	0.0549136	0.739761	0.0580765	0.0560714
chr7:20297902	chr7	20297902	-	Exon	-,Gm20512,Nectin2,Tomm40	none,ENSMUSG00000092381,ENSMUSG00000062300,ENSMUSG00000002984	0.512698	0.203571	0.0383023	0.279095	0.208145	0.238384	0.0958333	0.138889	0.0454545	0.22381	0.0888889	0.0784314	0.180736	0.295835	0.198227	0.25072	0.140556	0.239434	0.16675	0.120851	0.246278	0.178889	0.962381	0.188461	0.19061
chr7:30007838	chr7	30007838	-	UTR	Kcnk6	ENSMUSG00000046410	0.025799	0.0310918	0.0260857	0.038213	0.0219228	0.0252592	0.0235666	0.0263319	0.0302151	0.0244499	0.0266201	0.00706358	0.00988519	0.00765576	0.00871402	0.00715898	0.0114314	0.00932426	0.0147067	0.0116914	0.0123327	0.0138561	9.59872e-10	0.0272323	0.0103473
chr7:30007841	chr7	30007841	-	UTR	Kcnk6	ENSMUSG00000046410	0.00315256	0.0108551	0.0131815	0.0113017	0.0100252	0.010307	0.0182753	0.0160871	0.0176591	0.0172594	0.0150257	0.0129569	0.0133633	0.0145424	0.0202635	0.0177284	0.0106717	0.017089	0.0156542	0.0167601	0.017481	0.0209837	0.072442	0.0130118	0.0161358
chr7:30007863	chr7	30007863	-	UTR	Kcnk6	ENSMUSG00000046410	0.0116353	0.0117876	0.0127454	0.0132987	0.00683274	0.0160291	0.0131481	0.00903099	0.00662637	0.0183729	0.0140521	0.0107725	0.0165002	0.0118452	0.0186942	0.019557	0.0129412	0.0179345	0.0228258	0.0204676	0.0189803	0.0179577	0.00475712	0.0121417	0.0171342
chr7:30007870	chr7	30007870	-	UTR	Kcnk6	ENSMUSG00000046410	0.0104389	0.00337471	0.0110801	0.00361195	0.00620458	0.00748302	0.00882516	0.00796857	0.0166378	0.00138313	0.00218579	0.00546663	0.00566098	0.00803059	0.00881504	0.0087309	0.00944032	0.00696337	0.00557977	0.00842226	0.00985082	0.00986478	0.63978	0.00719943	0.00789322
chr7:30007882	chr7	30007882	-	UTR	Kcnk6	ENSMUSG00000046410	0.115034	0.0685046	0.0289855	0.0190632	0.117305	0.0151515	0.0541667	0.081671	0.0484848	0.0342105	0.0492063	0.0125	0.0410842	0.0442794	0.0457056	0.0440279	0.0529215	0.0456892	0.0621147	0.0454408	0.0466306	0.0378961	0.227833	0.0574348	0.0434809
chr8:4292228	chr8	4292228	-	Intron	Elavl1	ENSMUSG00000040028	0.0222222	0.116162	0.140741	0.134803	0.117989	0.166667	0.12037	0.225541	0.183333	0.122222	0.19246	0.0277778	0.0488889	0.0515873	0.0809263	0.115079	0.0870682	0.030303	0.0539337	0.106156	0.0311021	0.0719697	0.00053195	0.140228	0.0640721
chr8:72287845	chr8	72287845	-	UTR	Gm20422,Zfp866	ENSMUSG00000092544,ENSMUSG00000043090	0.0334535	0.00552072	0.0226328	0.0441267	0.0248374	0.026139	0.0207117	0.0261348	0.0175439	0.028304	0.0121555	0.0130082	0.0204853	0.0189484	0.0233347	0.0234661	0.025055	0.0281541	0.00610826	0.0128639	0.0199866	0.0233125	0.25879	0.0237782	0.0195203
chr8:72541205	chr8	72541205	-	UTR	Mau2	ENSMUSG00000031858	0.012085	0.0138554	0.008949	0.0127773	0.0103529	0.0138173	0.00594156	0.0133272	0.0134013	0.0122123	0.0068204	0.00451223	0.0108506	0.0161778	0.0161314	0.010453	0.0132904	0.0147202	0.0134882	0.0140056	0.0147987	0.0108692	0.29363	0.0112309	0.0126634
chr8:72541211	chr8	72541211	-	UTR	Mau2	ENSMUSG00000031858	0.00471054	0.00215493	0.0043005	0.0104354	0.00452603	0.00183671	0.00480769	0.00565712	0.00734448	0.000960615	0.000863558	0.00211949	0.0027484	0.00587155	0.0082789	0.00415312	0.00676845	0.00405881	0.00540451	0.00539836	0.00746704	0.00619615	0.353951	0.00432706	0.00531498
chr8:72709037	chr8	72709037	-	UTR	Slc25a42,Tmem161a	ENSMUSG00000002346,ENSMUSG00000002342	0.00728897	0.00811874	0.0138663	0.0089005	0.00579935	0.00913152	0.00444734	0.00650747	0.00609562	0.00751471	0.010081	0.00627301	0.00709818	0.0115349	0.0136766	0.0102248	0.00481846	0.0110291	0.010219	0.011212	0.00991746	0.00916765	0.162469	0.00797741	0.009561
chr8:75005892	chr8	75005892	-	UTR	Slc35e1	ENSMUSG00000019731	0.00437282	0.0106166	0.0103216	0.00510812	0.00976855	0.00553893	0.00740487	0.007204	0.00642518	0.0108674	0.00690004	0.00989973	0.0201894	0.0125909	0.0176458	0.0152041	0.0145056	0.0181138	0.0150984	0.0187768	0.0166325	0.0163045	4.79919e-07	0.00768437	0.0159056
chr8:87366067	chr8	87366067	-	UTR	Calr,Rad23a	ENSMUSG00000003814,ENSMUSG00000003813	0.0363359	0.0351704	0.0468093	0.0441084	0.0449798	0.0376518	0.0361617	0.032599	0.0314214	0.0373956	0.0379088	0.0363537	0.0332229	0.0646207	0.0769552	0.044159	0.0438232	0.0672273	0.0781312	0.0813169	0.0676785	0.0618099	0.000828071	0.0382311	0.0595726
chr9:18258558	chr9	18258558	-	intergenic	Zfp558	ENSMUSG00000074500	0.0294872	0.0138889	0.0244108	0.0300128	0.0719816	0.0285714	0.0578704	0.0123457	0.0185185	0.0281609	0.0361856	0.0149319	0.00966184	0.0198276	0.0300297	0.00297619	0.0222851	0.0249535	0.0454222	0.0272727	0.0341063	0.0165541	0.164421	0.0319485	0.0225474
chr9:20699416	chr9	20699416	-	Intron	Eif3g,Gm23008,Ppan	ENSMUSG00000070319,ENSMUSG00000089571,ENSMUSG00000004100	0.97841	0.973464	0.96107	0.949789	0.939042	0.947663	0.958054	0.96731	0.974202	0.96567	0.968561	0.574846	0.807218	0.808477	0.787932	0.845978	0.799464	0.865955	0.825721	0.868398	0.842811	0.846099	4.07589e-06	0.962112	0.806627
chr9:20699419	chr9	20699419	-	Intron	Eif3g,Gm23008,Ppan	ENSMUSG00000070319,ENSMUSG00000089571,ENSMUSG00000004100	0.976672	0.973766	0.962755	0.952305	0.937538	0.947403	0.95825	0.971792	0.971468	0.965667	0.971238	0.583761	0.80374	0.787145	0.782732	0.843418	0.806557	0.878442	0.837612	0.882875	0.83687	0.84733	4.58714e-06	0.962623	0.808226
chr9:67067141	chr9	67067141	-	UTR	Tln2	ENSMUSG00000052698	0.0110675	0.0109761	0.00677252	0.00751447	0.00787127	0.00927466	0.0108202	0.0127101	0.00996279	0.0104337	0.00885532	0.0128265	0.0142336	0.0168142	0.0147818	0.0124991	0.0172928	0.01107	0.0115456	0.0118749	0.0129124	0.0158938	8.74013e-05	0.00965987	0.013795
chr9:79603298	chr9	79603298	-	UTR	-,Cox7a2	none,ENSMUSG00000032330	0.0195976	0.0199116	0.0223199	0.0259349	0.0180968	0.0226127	0.0174076	0.0217139	0.0198129	0.0148677	0.019594	0.0298276	0.0142332	0.0115212	0.0192747	0.0179739	0.0253905	0.0453388	0.0213753	0.0216259	0.0253625	0.0200497	0.351404	0.02017	0.0229067
chrX:131123100	chrX	131123100	-	UTR	Btk,Gla,Rpl36a	ENSMUSG00000031264,ENSMUSG00000031266,ENSMUSG00000079435	0.0615131	0.0768147	0.0360013	0.0734903	0.0614256	0.0460715	0.0717646	0.110858	0.100606	0.037037	0.0375	0.0231636	0.0259322	0.0512566	0.0641241	0.0626863	0.0931996	0.0808337	0.0643289	0.0806037	0.0833489	0.0566259	0.812735	0.0648256	0.0623731
chrX:131123109	chrX	131123109	-	UTR	Btk,Gla,Rpl36a	ENSMUSG00000031264,ENSMUSG00000031266,ENSMUSG00000079435	0.0678603	0.0742894	0.036289	0.0644143	0.0607311	0.0420635	0.0684412	0.100404	0.0925156	0.0428571	0.0366569	0.0192525	0.0251259	0.05	0.0589727	0.0605414	0.0783425	0.0770941	0.0624007	0.0745612	0.0776324	0.0465153	0.578061	0.0624111	0.0573126
chrX:131123115	chrX	131123115	-	UTR	Gla,Rpl36a	ENSMUSG00000031266,ENSMUSG00000079435	0.0711866	0.0647784	0.0382784	0.047586	0.0740741	0.0394872	0.0934642	0.105266	0.103943	0.0355556	0.0151515	0.0171758	0.0279427	0.0295639	0.0479212	0.0637764	0.065655	0.0545378	0.0639078	0.0589529	0.0684317	0.0475644	0.228161	0.0626155	0.0495845
chrX:131123139	chrX	131123139	-	UTR	Gla,Rpl36a	ENSMUSG00000031266,ENSMUSG00000079435	0.173611	0.0847222	0.230134	0.164717	0.0238095	0.139394	0.130556	0.126706	0.14697	0.14652	0.0787037	0.129365	0.246187	0.102822	0.238596	0.336171	0.254831	0.153166	0.154286	0.230159	0.132317	0.172677	0.0273106	0.13144	0.195507
chrX:136479944	chrX	136479944	-	UTR	Rbm41	ENSMUSG00000031433	0.0161115	0.00982045	0.0138742	0.0138103	0.00763697	0.0138114	0.0121879	0.0108447	0.0123048	0.0124531	0.017135	0.0121379	0.0155885	0.0210677	0.0195199	0.018899	0.0210122	0.0162916	0.0220513	0.0118251	0.0131351	0.0140452	0.00797141	0.0127264	0.0168703
chrX:136479953	chrX	136479953	-	UTR	Rbm41	ENSMUSG00000031433	0.00684254	0.0046929	0.013555	0.00709842	0.00789395	0.00949249	0.00778214	0.0105647	0.00476565	0.0138831	0.00771994	0.00638213	0.00868851	0.00808333	0.00679753	0.00494247	0.00717245	0.00855756	0.00722069	0.00917875	0.012143	0.00794344	0.552398	0.00857189	0.00791908
chrX:147418357	chrX	147418357	-	UTR	Gnl3l	ENSMUSG00000025266	0.00482278	0.00962237	0.00460764	0.00185185	0.00522232	0.00509197	0.0146553	0.00565559	0.00296736	0.0108342	0.00752628	0.00897043	0.00764795	0.00689934	0.0125466	0.00845299	0.0131427	0.00782802	0.014389	0.00973654	0.00970432	0.00967836	0.0242569	0.00662343	0.00990876
chrX:147418358	chrX	147418358	-	UTR	Gnl3l	ENSMUSG00000025266	0.00584578	0.00483242	0.00436039	0.00835197	0.00399075	0.00948337	0.0135807	0.00736216	0.00654461	0.00385686	0.00576743	0.00496903	0.00878769	0.00764948	0.0059775	0.00919911	0.00750584	0.00576377	0.00628606	0.00459177	0.00957709	0.0053586	0.882174	0.00672513	0.00687872
chrX:147418359	chrX	147418359	-	UTR	Gnl3l	ENSMUSG00000025266	0.0416214	0.0295763	0.0349291	0.0306135	0.0256702	0.0348383	0.0332864	0.0413425	0.0239788	0.0401989	0.0318714	0.0345559	0.0427429	0.0504009	0.0486993	0.0447418	0.0530745	0.0455566	0.0445998	0.0338843	0.0422779	0.0541678	0.000353537	0.0334479	0.0449729
chrX:147418365	chrX	147418365	-	UTR	Gnl3l	ENSMUSG00000025266	0.00754227	0.00422352	0.00779378	0.00877805	0.00567376	0.00631149	0.00740902	0.00228094	0.00643683	0.00456621	0.00616443	0.00198553	0.00354476	0.0106474	0.00689446	0.00499387	0.0060995	0.00694102	0.00808887	0.00714684	0.00643422	0.00462825	0.982095	0.0061073	0.0061277
chrX:147419092	chrX	147419092	-	UTR	Gnl3l	ENSMUSG00000025266	0.00241546	0.00403911	0.0015873	0.00673238	0.00410727	0.00872521	0.0163917	0.00698995	0.00284091	0.00620697	0.00930233	0.00244366	0.011855	0.0143944	0.0114344	0.0123567	0.00670581	0.00765348	0.0101982	0.0161477	0.00890629	0.00958565	0.0351957	0.0063035	0.0101528
chrX:147419093	chrX	147419093	-	UTR	Gnl3l	ENSMUSG00000025266	0.0111051	0.0125951	0.00281294	0.0166036	0.00394602	0.00117786	0.00665312	0.00933076	0.00274725	0.0101217	0.00784832	0.00518474	0.00756315	0.00999978	0.00741043	0.00857581	0.0216366	0.0100903	0.0139829	0.00962609	0.0121616	0.00936156	0.169782	0.00772198	0.0105084
chrX:147419095	chrX	147419095	-	UTR	Gnl3l	ENSMUSG00000025266	0.00931639	0.00485437	0.00296296	0.00639552	0.0040404	0.00116144	0.00375019	0.0116402	0.0209771	0.0133594	0.0021645	0.0114591	0.0142721	0.0131126	0.00797424	0.00768113	0.0177056	0.00991925	0.0152172	0.00939211	0.0219013	0.0133636	0.0210303	0.00732932	0.0129089
chrX:147419161	chrX	147419161	-	UTR	Gnl3l	ENSMUSG00000025266	0.02171	0.012699	0.035873	0.0262973	0.0237607	0.0207233	0.00890091	0.0289923	0.00746269	0.0215155	0.0217892	0.0143084	0.0385915	0.0367222	0.0374526	0.0619781	0.0314367	0.0412894	0.0291029	0.0447585	0.0303019	0.0297319	0.00261293	0.020884	0.0359704
chrX:160414879	chrX	160414879	-	UTR	Car5b	ENSMUSG00000031373	0.0561241	0.0740741	0.1	0.112374	0.0580808	0.0138889	0.018018	0.0442105	0.0935185	0.0822222	0.108547	0.0252454	0.103998	0.0845583	0.125213	0.176998	0.111616	0.110554	0.132258	0.0585217	0.0676934	0.193661	0.043954	0.0691871	0.108211
chrX:160415964	chrX	160415964	-	UTR	Car5b	ENSMUSG00000031373	0.227744	0.172663	0.183966	0.189177	0.142728	0.208428	0.19893	0.265653	0.125	0.149174	0.184815	0.111111	0.122222	0.25	0.122222	0.0888889	0.125	0.0555556	0.166667	0.130952	0.114286	0.208333	0.0223768	0.186207	0.135931
chrX:160416357	chrX	160416357	-	UTR	-,Car5b	none,ENSMUSG00000031373	0.0195849	0.00369912	0.00513602	0.00242567	0.00595366	0.010891	0.0181815	0.0199788	0.0101996	0.0120114	0.0189712	0.00457481	0.0184943	0.0131637	0.0114646	0.0126686	0.0149756	0.0106695	0.0129136	0.0147118	0.0147181	0.0165352	0.489783	0.0115484	0.0131718
chrX:160416361	chrX	160416361	-	UTR	-,Car5b	none,ENSMUSG00000031373	0.0244884	0.00888889	0.0143358	0.0134153	0.0189734	0.0168973	0.0215968	0.0224683	0.0371677	0.00990892	0.0277253	0.0143545	0.0248692	0.0229236	0.0270631	0.0226274	0.0305369	0.0225645	0.0210402	0.0238394	0.0220707	0.0203358	0.250316	0.0196242	0.0229296
chrX:160416362	chrX	160416362	-	UTR	-,Car5b	none,ENSMUSG00000031373	0.0172067	0.017574	0.0178591	0.0232604	0.0134963	0.0304621	0.0245438	0.0270026	0.0147723	0.0202356	0.0197369	0.0203779	0.0196329	0.0213135	0.0219296	0.0256115	0.0294899	0.0233446	0.0279884	0.0309851	0.0221525	0.0242305	0.0710599	0.0205591	0.0242779
chrX:160416380	chrX	160416380	-	UTR	-,Car5b	none,ENSMUSG00000031373	0.021252	0.0102785	0.0186291	0.0154961	0.00712484	0.0237946	0.0155175	0.0159096	0.0214525	0.0162646	0.0197451	0.0114317	0.0178766	0.0181918	0.0207857	0.0184996	0.0236085	0.0162111	0.0186517	0.0184863	0.0214868	0.0151277	0.45628	0.0168604	0.0182143
chrX:160416386	chrX	160416386	-	UTR	-,Car5b	none,ENSMUSG00000031373	0.0383533	0.0101012	0.0207013	0.0195633	0.0161561	0.0240416	0.0214839	0.023508	0.029581	0.0185184	0.020816	0.02191	0.0212184	0.0300313	0.033548	0.0229381	0.0334037	0.0215763	0.0300852	0.029145	0.0240239	0.0238977	0.105284	0.0220749	0.0265252
chrX:160416399	chrX	160416399	-	UTR	-,Car5b	none,ENSMUSG00000031373	0.028832	0.020393	0.0238671	0.0186752	0.0231468	0.0141397	0.0120411	0.0166258	0.0102533	0.0114991	0.0171561	0.0153973	0.018286	0.0169108	0.024023	0.0181251	0.0220115	0.0273881	0.0203073	0.0192783	0.0169659	0.0193791	0.352551	0.0178754	0.0198248
chrX:160416419	chrX	160416419	-	UTR	-,Car5b	none,ENSMUSG00000031373	0.0189903	0.0109605	0.00606061	0.0123744	0.00653595	0.00701907	0.00760641	0.0141272	0.0222222	0.010397	0.00751659	0.00235571	0.0166777	0.0186961	0.0256498	0.0150815	0.0233491	0.0111719	0.0168819	0.0300627	0.0227933	0.0189747	0.0188038	0.0112555	0.0183359
chrX:160416718	chrX	160416718	-	UTR	Car5b	ENSMUSG00000031373	0.00887597	0.00383142	0.00730661	0.00536952	0.0072243	0.00968722	0.0135541	0.00942398	0.00463149	0.00700804	0.00677249	0.00569861	0.010843	0.0256297	0.0103364	0.0101252	0.011608	0.00951662	0.00659084	0.00528034	0.00944656	0.0107176	0.128208	0.00760774	0.0105266
chrX:160416726	chrX	160416726	-	UTR	Car5b	ENSMUSG00000031373	0.019889	0.00971442	0.0106722	0.0150389	0.00357143	0.0152398	0.0160096	0.0143411	0.0153386	0.0123871	0.008345	0.0063557	0.00817285	0.0096617	0.00812638	0.010677	0.00718191	0.00788307	0.0108485	0.0095964	0.0119889	0.0141013	0.0430235	0.012777	0.00950852
chrX:160416743	chrX	160416743	-	UTR	Car5b	ENSMUSG00000031373	0.0510054	0.0155014	0.0272216	0.0300687	0.0178571	0.0228028	0.0374014	0.0228959	0.0162698	0.0336865	0.0211663	0.0202586	0.0326039	0.0226314	0.0271231	0.0353829	0.0302237	0.0206844	0.030858	0.0288039	0.0233271	0.0345293	0.793304	0.0268979	0.0278569
chrX:160416746	chrX	160416746	-	UTR	Car5b	ENSMUSG00000031373	0.00537634	0.00793651	0.0119032	0.0156963	0.00851732	0.0227087	0.0256767	0.0160911	0.0120968	0.0160372	0.00528085	0.0136045	0.0143288	0.020096	0.0243317	0.0130059	0.0110023	0.0108188	0.0211609	0.0119332	0.0174927	0.0173657	0.30966	0.0133928	0.0159219
chrX:160416748	chrX	160416748	-	UTR	Car5b	ENSMUSG00000031373	0.052964	0.0108401	0.0201109	0.0227258	0.019293	0.0273713	0.0354602	0.0226163	0.0388494	0.0383549	0.0221034	0.0137318	0.025153	0.0162896	0.0213371	0.0293458	0.0231112	0.0206668	0.0268396	0.0191357	0.0184949	0.0297587	0.137915	0.0282445	0.0221695
chrX:71109181	chrX	71109181	-	Exon	L1cam	ENSMUSG00000031391	0.0179489	0.00857751	0.0174703	0.0186268	0.00520528	0.0161884	0.0101326	0.0134364	0.00979141	0.0125202	0.0137987	0.0106592	0.0159524	0.0183897	0.0210494	0.0174103	0.0174006	0.0192991	0.0156238	0.0197885	0.0220499	0.018947	0.00704635	0.0130633	0.01787

## Sheet: Legend
Supplemental Table S1: Editing levels of known mouse editing sites across all timepoints in nascent and total RNA
In a previously published study (De Pretis et al, 2017), the transcriptional dynamics following MYC activation had been investigated using RNA-seq.
This published dataset was downloaded from SRA. The raw reads were mapped to the mouse transcriptome (mm10).
Subsequently, editing levels at known editing sites were quantified.
Column labels are as follows:
id	chromosome plus position (mm10)
chr	chromosome (mm10)
pos	position of editing site on chromosome (mm10)
str	strand (+/-)
ann	location of editing site (UTR, exon, intron)
gene_name	gene where editing site is located
ENS_id	ENSEMBL id of the gene
RNA total/labeled timepoint average ed-level	average editing levels of labeled (nascent RNA) or total RNA time points as indicated
P-value-lab-tot	p-value
Average-total	average of all total RNA time points
Average-labeled	average of all nascent RNA time points
