# Supplementary material for: RNA Pol II–dependent transcription efficiency fine-tunes A-to-I editing levels
Source: Genome Res. 2024 Feb;34(2):231–42. doi: 10.1101/gr.277686.123 (PMC10984384; doi:10.1101/gr.277686.123)
Supplement: Supplement 3 [file Supplemental_Table_S3.xlsx]

## Sheet: Main
Gene + Editing Site	nascent 0 min	nascent 8 h	nascent 12 h	nascent 16 h	nascent 10 min	nascent 20 min	nascent 30 min	nascent 1.5 h	nascent 2 h	nascent 1 h	nascent 4 h	total 8 h	total 1.5 h	total 20 min	total 30 min	total 12 h	total 16 h	total 0 min	total 2 h	total 4 h	total 10 min	total 1 h
Sfxn2,Wbp1l - chr19:46670181	0.0157382	0.0260046	0.0262793	0.0234111	0.0254665	0.0131571	0.0216359	0.0188446	0.0258323	0.0153638	0.0248632	0.0111111	0.0198122	0.0239591	0.023622	0.0534859	0.0189573	0.0165581	0.0153874	0.02178	0.00806138	0.031876
Rbm41 - chrX:136479953	0.00638213	0.00917875	0.012143	0.00794344	0.00868851	0.00808333	0.00679753	0.00717245	0.00855756	0.00494247	0.00722069	0.00476565	0.00949249	0.013555	0.00709842	0.0138831	0.00771994	0.00684254	0.00778214	0.0105647	0.0046929	0.00789395
Dnase2a,Mast1 - chr8:87435097	0.00502904	0.0128659	0.00807949	0.00688867	0.00955128	0.00637061	0.00438833	0.0065085	0.0108308	0.00487462	0.00826187	0.00902527	0.0149466	0.00610514	0.00758986	0.0112297	0.00780882	0.010592	0.00460221	0.0158195	0.00388184	0.00650232
Lix1 - chr17:17596079	0.0028947	0.00337286	0.00493384	0.00434088	0.00291826	0.00357153	0.00424751	0.0025257	0.00389287	0.00422388	0.00405639	0.00307788	0.00377889	0.00373255	0.00297625	0.00568694	0.00205759	0.00324609	0.00180411	0.0073711	0.00183325	0.00450526
Agl - chr3:116447037	0.00217168	0.0047973	0.0119712	0.00560513	0.00387425	0.010912	0.00656024	0.00674481	0.00699601	0.00483603	0.00487349	0.00725073	0.00890486	0.00646176	0.00712973	0.0115472	0.00706132	0.00899356	0.00525603	0.0147068	0.00361886	0.00998814
-,Gm22215,Hnrnpll - chr17:80436935	0.00470035	0.00419287	0.00361069	0.00794878	0.00705209	0.0044256	0.00703235	0.00744407	0.0137136	0.00213675	0.00814834	0.0129006	0.0261453	0.0299866	0.0404365	0.0370196	0.0289495	0.0457792	0.0148148	0.035818	0.0225244	0.0716726
-,Sppl2a - chr2:126718601	0.00678567	0.0101427	0.000658762	0.00827254	0.000843882	0.0051111	0.00152145	0.00794495	0.00559949	0.00315617	0.00752189	0.0270985	0.0199996	0.0127838	0.0232655	0.0232131	0.020701	0.0244419	0.0328982	0.017117	0.0161974	0.0447204
-,Dlst - chr12:86465358	0.111111	0.171958	0.143939	0.178968	0.0946078	0.132275	0.075	0.0811802	0.136859	0.0723104	0.0625	0.261364	0.339683	0.160285	0.329545	0.19697	0.130952	0.217949	0.203571	0.359687	0.0740741	0.378451
Hspa4 - chr11:53077860	0.0740741	0.208333	0.106883	0.169853	0.015873	0.0571429	0.20346	0.0642857	0.102273	0.174342	0.181385	0.25	0.442857	0.142857	0.237162	0.481481	0.16934	0.309524	0.0952381	0.375661	0.232804	0.360606
Icam1 - chr9:20823953	0.00630452	0.00995701	0.00885084	0.00456918	0.00599715	0.00457541	0.00699529	0.00488393	0.00762215	0.00771798	0.0100655	0.00806452	0.0126959	0.00618174	0.00961916	0.00824074	0.00814722	0.00526398	0.00236407	0.00624229	0.0105409	0.0144083
Amdhd2,Atp6v0c,Gm43796 - chr17:24299404	0.0023218	0.00381926	0.00176487	0.00381786	0.0058446	0.00521032	0.00270943	0.00499017	0.00359269	0.00408774	0.00398238	0.0068742	0.00918345	0.00531336	0.0037635	0.00510207	0.00528411	0.00187599	0.00342938	0.00606663	0.00597509	0.00870923
N4bp2l2 - chr5:151440842	0.000520833	0.00390068	0.00361775	0.00273974	0.00312409	0.0019304	0.000983691	0.00295167	0.00107182	0.00603216	0.00196767	0.00579882	0.0151736	0.00625	0.00433362	0.0100705	0.00502484	0.00228311	0.00134953	0.001221	0.00345423	0.0113291
-,6230400D17Rik,Fut11,Gm25328,Sec24c - chr14:21516753	0.0180309	0.0209523	0.0182492	0.0227166	0.0207831	0.0227142	0.014882	0.0223211	0.0168458	0.0275964	0.0266499	0.0313853	0.0266459	0.0222572	0.0180614	0.0210229	0.012969	0.0278047	0.0432706	0.0333951	0.0588677	0.0580302
Kcnk6 - chr7:30007882	0.0125	0.0454408	0.0466306	0.0378961	0.0410842	0.0442794	0.0457056	0.0529215	0.0456892	0.0440279	0.0621147	0.0484848	0.0151515	0.0289855	0.0190632	0.0342105	0.0492063	0.115034	0.0541667	0.081671	0.0685046	0.117305
Gm13031,Padi2 - chr4:140507497	0.0232009	0.0285438	0.0363499	0.0314169	0.0331802	0.0721565	0.0466394	0.0457994	0.0298611	0.0499911	0.0386331	0.0326087	0.017094	0.066046	0.0283224	0.0315612	0.0349393	0.033664	0.0204795	0.0192308	0.0381726	0.160672
Huwe1 - chrX:148304093	0.0555556	0.155556	0.197114	0.085237	0.2	0.0661376	0.212827	0.123106	0.0846847	0.162768	0.0998217	0.166667	0.111111	0.214286	0.305556	0.111111	0.222222	0.0833333	0.194444	0.161905	0.15	0.444444
AC154510.1,Zfp874b - chr13:67574272	0.00962323	0.00619886	0.00775303	0.00773306	0.00840401	0.0134556	0.0118772	0.00667449	0.0127267	0.0112964	0.00976537	0.0117624	0.014188	0.0122269	0.0119935	0.00718444	0.00751308	0.00694084	0.00650686	0.0105944	0.0071495	0.0176115
4930402H24Rik,A730017L22Rik - chr2:130698750	0.00262974	0.00339368	0.00344551	0.00322768	0.00320811	0.00538362	0.0033589	0.00393969	0.00455295	0.00415525	0.00337096	0.00232862	0.00346891	0.00232452	0.00170031	0.00415582	0.00244952	0.000562038	0.0021036	0.00411344	0.00355994	0.00886805
Eya3,Xkr8 - chr4:132281917	0.00765208	0.0184835	0.00774827	0.00792091	0.00853686	0.00868992	0.00768265	0.00515972	0.0226537	0.00896508	0.014386	0.00729927	0.00653595	0.00421941	0.00484689	0.00767273	0.00601852	0.0176762	0.0148459	0.00189394	0.00294985	0.00740741
Zfp941 - chr7:147996955	0.0122324	0.0375854	0.0265682	0.0236185	0.0544238	0.0246242	0.0297674	0.0257516	0.0447782	0.0138672	0.03005	0.0386905	0.0148148	0.010101	0.00617284	0.00877193	0.015873	0.060202	0.0334325	0.0147243	0.00793651	0.0281746
Mir3076,Tkt - chr14:31386780	0.0952381	0.0277778	0.047619	0.200096	0.0779221	0.0706522	0.0666667	0.070303	0.0892857	0.0779221	0.0151515	0.0925926	0.0691224	0.034973	0.0871945	0.0502406	0.0164706	0.0883838	0.0416667	0.0340257	0.0387184	0.0388889
Rnf168 - chr16:32300010	0.0138714	0.0341766	0.0197389	0.0520908	0.022389	0.0647557	0.0427848	0.0158308	0.0311362	0.014146	0.022866	0.0386106	0.0201664	0.0300803	0.0172061	0.0184877	0.00375439	0.0224241	0.0168817	0.0286954	0.00461492	0.0311852
Car5b - chrX:160416718	0.00569861	0.00528034	0.00944656	0.0107176	0.010843	0.0256297	0.0103364	0.011608	0.00951662	0.0101252	0.00659084	0.00463149	0.00968722	0.00730661	0.00536952	0.00700804	0.00677249	0.00887597	0.0135541	0.00942398	0.00383142	0.0072243
Gm20422,Zfp866 - chr8:72287845	0.0130082	0.0128639	0.0199866	0.0233125	0.0204853	0.0189484	0.0233347	0.025055	0.0281541	0.0234661	0.00610826	0.0175439	0.026139	0.0226328	0.0441267	0.028304	0.0121555	0.0334535	0.0207117	0.0261348	0.00552072	0.0248374
Car5b - chrX:160416743	0.0202586	0.0288039	0.0233271	0.0345293	0.0326039	0.0226314	0.0271231	0.0302237	0.0206844	0.0353829	0.030858	0.0162698	0.0228028	0.0272216	0.0300687	0.0336865	0.0211663	0.0510054	0.0374014	0.0228959	0.0155014	0.0178571
Car5b - chrX:160416748	0.0137318	0.0191357	0.0184949	0.0297587	0.025153	0.0162896	0.0213371	0.0231112	0.0206668	0.0293458	0.0268396	0.0388494	0.0273713	0.0201109	0.0227258	0.0383549	0.0221034	0.052964	0.0354602	0.0226163	0.0108401	0.019293
Zfp941 - chr7:147996951	0.0343434	0.0190199	0.0406707	0.063329	0.0587992	0.0364661	0.061161	0.0506026	0.0277435	0.0365841	0.0172346	0.0753106	0.0818309	0.0785534	0.0777055	0.0636174	0.0505466	0.129068	0.045977	0.0309829	0.0773314	0.035461
Gmip,Lpar2 - chr8:72342790	0.0397911	0.0709753	0.0673745	0.0778579	0.0650493	0.0519381	0.0589863	0.0837775	0.0647154	0.0607749	0.0627777	0.0805556	0.100974	0.0770723	0.0732283	0.0509614	0.0606397	0.124971	0.0691908	0.0967395	0.0618588	0.0767396
Gm14018,Mfap1a - chr2:121318621	0.00558921	0.00878187	0.0154936	0.0173865	0.0147502	0.0099866	0.0127655	0.0138611	0.0133117	0.0171154	0.0137311	0.022665	0.0178744	0.0146232	0.0258919	0.0108318	0.0138778	0.0293603	0.021314	0.0134291	0.00965016	0.0190233
Cdk11b,Gm10563,Gm16023,Slc35e2 - chr4:154996426	0.0144632	0.0237503	0.0251598	0.021676	0.0157428	0.0249587	0.0166127	0.0275025	0.0171202	0.0205448	0.0204142	0.0294407	0.0594238	0.0225854	0.0209249	0.0235068	0.0199857	0.03243	0.021594	0.0202169	0.0191947	0.0137388
Cdk11b,Gm10563,Gm16023,Slc35e2 - chr4:154996431	0.0134103	0.0262608	0.0242912	0.0239012	0.0198687	0.0230588	0.0173412	0.0215047	0.0185809	0.0202868	0.0179645	0.0274805	0.0523865	0.028268	0.0290288	0.0168082	0.0203739	0.0265779	0.0216214	0.0338997	0.011766	0.0158558
Ssh2 - chr11:77245241	0.0151858	0.0160788	0.0262185	0.0205365	0.0154955	0.0148943	0.0194135	0.0212615	0.0185608	0.0218512	0.0196126	0.0196353	0.0465196	0.0229174	0.0199507	0.00738557	0.028899	0.0161018	0.0233341	0.0141684	0.0192478	0.0204692
Mdc1,Nrm,Ppp1r18os - chr17:35995842	0.0067514	0.00933869	0.011784	0.0092251	0.00826771	0.0105509	0.0121684	0.00835333	0.00842166	0.0105469	0.0113826	0.0136152	0.0203653	0.0116664	0.0120632	0.0110614	0.0130543	0.0125813	0.00903938	0.00818919	0.0144909	0.0120379
Pcsk2 - chr2:143401310	0.00246914	0.0190671	0.0315595	0.0690441	0.0587816	0.012332	0.0175926	0.00760277	0.0470999	0.043445	0.0187328	0.00769231	0.0762223	0.00387597	0.00501253	0.0255462	0.0118927	0.103621	0.0130793	0.0065683	0.0239691	0.00225225
-,Gm20512,Nectin2,Tomm40 - chr7:20297902	0.0784314	0.120851	0.246278	0.178889	0.180736	0.295835	0.198227	0.140556	0.239434	0.25072	0.16675	0.0454545	0.238384	0.0383023	0.279095	0.22381	0.0888889	0.512698	0.0958333	0.138889	0.203571	0.208145
Rpa1 - chr11:75114120	0.0114943	0.0516619	0.0249767	0.0411831	0.00724638	0.00740741	0.0209138	0.0114943	0.0681381	0.0533428	0.0286446	0.0287879	0.0282111	0.0374211	0.0227196	0.0573294	0.0607322	0.0299896	0.0247277	0.032913	0.0331069	0.0235638
Gm12953,Tmem69 - chr4:116224882	0.00355983	0.00780334	0.00425832	0.00447028	0.00448121	0.0045909	0.00277704	0.0035022	0.00572383	0.0072667	0.0047339	0.00739039	0.00497918	0.00459059	0.00606334	0.00808992	0.00617919	0.00365023	0.00367663	0.00261	0.0054988	0.00281191
Gm10490,Gm10491,Timm17b - chrX:7484230	0.0240285	0.0350131	0.0297588	0.0303904	0.0194764	0.0448783	0.0303779	0.0402016	0.0310473	0.0330071	0.034219	0.0646429	0.035589	0.0329117	0.053727	0.0962792	0.0474347	0.0247233	0.0840163	0.026011	0.0400966	0.0315835
Gm10490,Gm10491,Timm17b - chrX:7484235	0.0218105	0.029598	0.0227663	0.0245753	0.0169577	0.0379664	0.0265187	0.0321245	0.0251771	0.0302677	0.0240259	0.0457692	0.032229	0.0330821	0.0319766	0.0738274	0.0390823	0.0197144	0.0771692	0.021742	0.0294991	0.0241841
Gga2,Gm44987 - chr7:129131175	0.00791825	0.00961486	0.00982854	0.00796905	0.00675153	0.00498526	0.00879684	0.011014	0.00559024	0.00534279	0.00705368	0.00907388	0.00472069	0.00756634	0.0105696	0.0154974	0.0120562	0.0116507	0.0098601	0.0040834	0.00600345	0.00865441
Fam219b,Gm26631,Mpi - chr9:57389844	0.0221463	0.0203287	0.0206194	0.0268398	0.0349548	0.0185772	0.018333	0.0198919	0.0118198	0.0316078	0.0311756	0.0277778	0.0229847	0.0225163	0.0271997	0.0493201	0.0385363	0.0209811	0.0248843	0.0277148	0.0122582	0.0205279
Klhl7,Nupl2 - chr5:23666922	0.00773047	0.0218744	0.0204146	0.0144799	0.0220094	0.0252117	0.0201536	0.0185991	0.0218025	0.0146343	0.0186373	0.0218767	0.0152253	0.0183313	0.0103662	0.0359875	0.0217694	0.0117481	0.0219983	0.00953413	0.0139527	0.0139537
-,Gm11613 - chr11:97506882	0.0153886	0.0191963	0.0173835	0.0212189	0.0229469	0.0259971	0.024035	0.0263138	0.0235807	0.0265266	0.0249386	0.0264595	0.0180855	0.0238928	0.0234085	0.0356161	0.0333864	0.0201049	0.020202	0.014204	0.0181543	0.0209447
Gm20662,Ip6k1 - chr9:107935594	0.00195752	0.00343177	0.00716888	0.00342427	0.00376818	0.000609385	0.00137042	0.00269139	0.000585823	0.00328019	0.00367254	0.00680473	0.010582	0.00193798	0.0015873	0.00722496	0.00744048	0.00333333	0.00484419	0.00606061	0.0138117	0.00200803
Slfn5,Slfn5os - chr11:82776068	0.0204511	0.0132794	0.0198518	0.0150703	0.0106967	0.0352849	0.0236534	0.0241288	0.00904413	0.0174266	0.0183811	0.0535714	0.0483131	0.0563492	0.025	0.0809387	0.0422705	0.0227273	0.0327273	0.0242063	0.0498457	0.018018
Nup155 - chr15:8062978	0.0266667	0.0549446	0.132727	0.104024	0.0573671	0.0402633	0.0222222	0.0618908	0.045809	0.0488215	0.0933099	0.163333	0.109812	0.135317	0.0368873	0.289524	0.267702	0.109253	0.0675729	0.134304	0.200516	0.100877
Noct - chr3:51050527	0.0819048	0.0791997	0.0999455	0.0985772	0.028749	0.07961	0.104857	0.0358456	0.0444444	0.0677978	0.0724432	0.509524	0.19943	0.153439	0.0714286	0.113636	0.136512	0.224074	0.133929	0.0769231	0.0608466	0.138528
AC154510.1,Zfp874b - chr13:67573961	0.0125632	0.0136994	0.0112189	0.0125687	0.00887615	0.0091014	0.0100818	0.0105486	0.0134333	0.0112031	0.0153191	0.0476105	0.00528846	0.0100431	0.00248756	0.0181223	0.00311526	0.003367	0.0127315	0.00853691	0.0117779	0.011329
Icam1 - chr9:20823964	0.0124009	0.0262934	0.0209234	0.0256846	0.01604	0.0210528	0.0177362	0.0117417	0.0259431	0.0222469	0.0137128	0.0397647	0.0274285	0.0256186	0.0161695	0.0273739	0.0233766	0.0189762	0.0183404	0.0229561	0.0208761	0.0136533
Slfn5,Slfn5os - chr11:82776122	0.00265581	0.00330111	0.00390587	0.00295251	0.00370706	0.00318553	0.00326877	0.00238418	0.00389884	0.00497681	0.00433395	0.00752862	0.00589141	0.00551492	0.00532207	0.00413348	0.00423246	0.00352508	0.00326696	0.00408846	0.00393218	0.00354633
Trappc9 - chr15:72824955	0.0103674	0.0136089	0.00936146	0.0128128	0.0114204	0.00729268	0.0138623	0.0104874	0.0134143	0.0126594	0.00716465	0.0389418	0.0243108	0.0196809	0.0167549	0.0215645	0.0251841	0.0190408	0.0109204	0.0130933	0.020412	0.0159907
Yars - chr4:128875867	0.0333333	0.0423387	0.0319444	0.0726335	0.0266458	0.0303644	0.158201	0.109307	0.0488889	0.0274194	0.131335	0.245455	0.150794	0.12037	0.0892857	0.0925926	0.191667	0.252646	0.114286	0.108333	0.0277778	0.108333
Ccdc73,Eif3m - chr2:104837085	0.0555556	0.0567633	0.175	0.087809	0.0793651	0.108333	0.315391	0.130952	0.202093	0.107226	0.147222	0.4375	0.490741	0.15	0.150794	0.297619	0.5	0.555556	0.222222	0.192696	0.511111	0.277778
Utp4 - chr8:109435787	0.111111	0.0527778	0.031746	0.0229885	0.047619	0.05	0.0166667	0.0625	0.0537037	0.0515873	0.0693713	0.0909091	0.0740741	0.218254	0.0151515	0.0833333	0.155952	0.166667	0.108333	0.0430556	0.166667	0.177778
Ppip5k1 - chr2:121154909	0.0234404	0.056105	0.0510262	0.0229505	0.0325611	0.032315	0.0151593	0.018038	0.0199134	0.0412055	0.0117991	0.0557143	0.0769928	0.0626984	0.041351	0.0588235	0.105051	0.0770609	0.0792231	0.0583333	0.0371353	0.0777462
Cd52,Crybg2 - chr4:133645738	0.0176749	0.0225165	0.0289445	0.0216124	0.0272389	0.0238806	0.0270263	0.0226242	0.0258972	0.0247154	0.020781	0.0359796	0.0315272	0.0391818	0.0365584	0.0388082	0.0520416	0.0339686	0.0421655	0.0301614	0.036673	0.0392473
Mrpl43,Twnk - chr19:45082916	0.111111	0.150383	0.0839947	0.221068	0.2	0.0525794	0.192222	0.154904	0.0803394	0.179441	0.195298	0.177647	0.301646	0.201282	0.2571	0.250414	0.309847	0.443529	0.257937	0.233448	0.298413	0.291925
Mrpl24,Rrnad1 - chr3:87725373	0.134454	0.104762	0.0811966	0.103175	0.0651515	0.0978836	0.05	0.0555556	0.0742706	0.0733586	0.134615	0.138889	0.133824	0.120811	0.131779	0.123252	0.150505	0.261905	0.161325	0.112434	0.180097	0.211455
-,Rmi2 - chr16:10840984	0.0130509	0.0269508	0.0240158	0.0223626	0.0213864	0.0188417	0.0151216	0.0200069	0.0210882	0.0173349	0.0242088	0.00877193	0.0202661	0.00901442	0.0125786	0.00623053	0.0364953	0.026455	0.0349849	0.0235765	0.0330655	0.0178378
Gm11613 - chr11:97505853	0.0167402	0.0260011	0.0286693	0.0384709	0.0160289	0.0223558	0.0249869	0.0158784	0.0193524	0.0130315	0.0186719	0.0146696	0.0548716	0.0145653	0.0213855	0.00738193	0.024689	0.0185662	0.0375956	0.0276263	0.0399275	0.022861
Gm11613 - chr11:97505832	0.00590387	0.0142029	0.012587	0.0255927	0.00977165	0.00897866	0.0166307	0.015636	0.0107833	0.00829939	0.00987112	0.00224215	0.0106642	0.00751617	0.0090472	0.00978019	0.00718374	0.0130902	0.0323482	0.0184372	0.033795	0.0251462
Gm11613 - chr11:97505848	0.0115237	0.0230742	0.0242572	0.0336795	0.0144151	0.0156604	0.0185957	0.0152088	0.0149181	0.0117957	0.0131083	0.00746465	0.016657	0.0157779	0.021157	0.0110778	0.0181135	0.014721	0.0347602	0.0257094	0.0389263	0.0275118
Acad9,Gm43079,Gm43205 - chr3:35991373	0.00679119	0.0279265	0.0180514	0.0182948	0.0189604	0.0194205	0.0438956	0.0215013	0.0218708	0.0205433	0.0159444	0.0107459	0.0436186	0.0175947	0.0141831	0.0117216	0.0486175	0.0162347	0.0346242	0.01882	0.0265585	0.0598847
Zfp558 - chr9:18258558	0.0149319	0.0272727	0.0341063	0.0165541	0.00966184	0.0198276	0.0300297	0.0222851	0.0249535	0.00297619	0.0454222	0.0185185	0.0285714	0.0244108	0.0300128	0.0281609	0.0361856	0.0294872	0.0578704	0.0123457	0.0138889	0.0719816
Gm42674,S100a3,S100a4,S100a5 - chr3:90409078	0.000328407	0.00194282	0.000589971	0.000349406	0.000850557	0.000674411	0.00051511	0.00110503	0.000484033	0.000353959	0.000472316	0.000855627	0.000828585	0.000789411	0.00112602	0.000949071	0.00115313	0.000783857	0.00086077	0.000949897	0.001277	0.000963426
Cdk11b,Gm10563,Gm16023,Gm16024,Slc35e2 - chr4:154995635	0.0010929	0.0155106	0.00553568	0.00294335	0.00686927	0.00714211	0.00320551	0.00493979	0.00715414	0.00299292	0.00489491	0.00242718	0.0101343	0.00618234	0.00674361	0.00828783	0.00696365	0.00901812	0.012782	0.00976508	0.00329722	0.00744048
Topbp1 - chr9:103237985	0.0021425	0.00302756	0.00739498	0.00464045	0.00457989	0.00431894	0.0018438	0.00280995	0.00317028	0.00501522	0.0043867	0.000667557	0.00341901	0.00187512	0.000968992	0.00200803	0.00403459	0.00212536	0.000544662	0.00244697	0.00169779	0.00493884
Agl - chr3:116447036	0.000373692	0.00256812	0.00463377	0.00274212	0.00261355	0.00323198	0.00138756	0.00199557	0.00182961	0.00393658	0.00636701	0.00170648	0.00243902	0.0010582	0.00114155	0.003861	0.00282486	0.00171821	0.00179211	0.00275686	0.00252525	0.00226363
Ncbp2,Senp5 - chr16:31960752	0.0907434	0.144883	0.148261	0.143926	0.200968	0.118375	0.123659	0.0994513	0.122804	0.11718	0.144803	0.0981395	0.108609	0.130266	0.0938248	0.07212	0.105987	0.0885529	0.0813304	0.112264	0.0850949	0.0872615
Gmip,Lpar2 - chr8:72342755	0.0388839	0.0618386	0.0712529	0.0823922	0.0745653	0.0452923	0.0380671	0.0413576	0.0544044	0.0748728	0.0665678	0.0499378	0.0568757	0.0678681	0.0518247	0.0393306	0.0501778	0.055691	0.0421142	0.0532308	0.0471048	0.0550576
Acad12 - chr5:122052937	0.0294757	0.0444335	0.0467764	0.061216	0.0516287	0.0283218	0.0256554	0.0313087	0.0378702	0.0497781	0.0450447	0.027537	0.0355585	0.0363072	0.0353634	0.0234496	0.0278929	0.0330046	0.0264153	0.0294592	0.0314046	0.0309439
-,Rps19-ps3,Zfp933 - chr4:147199082	0.0100515	0.0103165	0.020418	0.012591	0.00676819	0.00736831	0.0071953	0.0117103	0.00649598	0.0101033	0.00482058	0.00595238	0.00421941	0.00600601	0.00506096	0.00865801	0.00828445	0.0045045	0.00681726	0.0163348	0.0047619	0.00411523
2900026A02Rik - chr5:113516854	0.0276361	0.025641	0.130435	0.0676768	0.0665205	0.0333333	0.0470035	0.0215278	0.0710824	0.00666667	0.020202	0.0111111	0.0344186	0.0121574	0.00606061	0.0390361	0.054942	0.0128205	0.0387597	0.0310451	0.0296323	0.00653595
-,Rbpj - chr5:53992102	0.00471098	0.0146012	0.00982049	0.00860837	0.00666153	0.00641873	0.0021575	0.00624007	0.00553151	0.00754817	0.00511367	0.00297619	0.0015015	0.00582242	0.00118203	0.00672308	0.00387014	0.00172712	0.00212314	0.00237248	0.00455646	0.00130719
Gm42715,Snora30,Srcap - chr7:134670018	0.0595238	0.25947	0.399547	0.166332	0.135632	0.11828	0.125953	0.290172	0.0596491	0.0993796	0.173927	0.125	0.037037	0.213716	0.0588235	0.0925926	0.0714286	0.205882	0.00980392	0.166667	0.195238	0.0333333
-,Pmepa1 - chr2:173053275	0.0407407	0.121481	0.121212	0.0691193	0.0208333	0.0636277	0.0144928	0.0656566	0.0350877	0.0424501	0.0798044	0.0379433	0.0378771	0.0470096	0.045965	0.0236111	0.0426635	0.0521903	0.0505552	0.0330874	0.0598153	0.0249789
-,Pmepa1 - chr2:173053279	0.025641	0.100488	0.130303	0.0289855	0.0208333	0.0512821	0.0133333	0.0774194	0.0350877	0.0429125	0.0656396	0.0278797	0.024269	0.0555694	0.0432552	0.0266199	0.0268031	0.0548309	0.0443838	0.0342959	0.0379052	0.0181431
Ccdc189,Phkg2 - chr7:134722683	0.00340699	0.00728598	0.00562378	0.00885881	0.00584483	0.00692301	0.00531151	0.00613761	0.00622554	0.00607004	0.00888046	0.00414148	0.00423392	0.00612651	0.00517455	0.00708535	0.00310002	0.0053711	0.00633533	0.00752452	0.00987444	0.00382513
Wdfy1 - chr1:79700645	0.0143541	0.0177344	0.0232199	0.0339982	0.023973	0.023154	0.0242334	0.0241875	0.020141	0.0324369	0.0290525	0.0355465	0.0104575	0.0389592	0.023007	0.0282674	0.0140845	0.0207603	0.0211233	0.0218057	0.0481373	0.00765507
Gm13031,Padi2 - chr4:140507493	0.00710751	0.0157643	0.00904208	0.00986218	0.0105683	0.00525746	0.0101255	0.0130769	0.0124975	0.0159631	0.00831901	0.0109489	0.00757576	0.0118767	0.0142071	0.0107979	0.0154645	0.00741385	0.00738658	0.0138739	0.0239859	0.00469484
Trappc9 - chr15:72825131	0.0055674	0.00783457	0.00629479	0.00465231	0.00877127	0.00730279	0.0071883	0.00719152	0.00732223	0.0061387	0.00751938	0.00488727	0.00908756	0.00589843	0.00851147	0.00520009	0.00346662	0.00661771	0.00756952	0.00979306	0.0141129	0.00291924
Iws1 - chr18:32262582	0.0197195	0.0178563	0.0397832	0.0342269	0.0251027	0.0232621	0.0236429	0.0292444	0.0364778	0.035114	0.0312206	0.0188033	0.0327363	0.0327996	0.0239324	0.016743	0.0157582	0.0227523	0.0286186	0.0276741	0.0456321	0.0200769
Acad9,Gm43079,Gm43205 - chr3:35991416	0.0194626	0.0255182	0.0278423	0.0242009	0.0266617	0.0195223	0.021798	0.0332341	0.023497	0.0272913	0.0253932	0.0124577	0.0322787	0.0109625	0.0120494	0.0133063	0.0199671	0.0133791	0.00746237	0.0188216	0.0424861	0.0186632
Gmip,Lpar2 - chr8:72342784	0.00330033	0.0136184	0.0136463	0.0202952	0.00277778	0.00995033	0.00831077	0.0132989	0.00592049	0.00953554	0.00839617	0.01261	0.0185118	0.00350877	0.0037037	0.00953501	0.00935605	0.0222854	0.00666667	0.0182766	0.0166192	0.00497512
Kif2a - chr13:107786841	0.0375903	0.0439095	0.060156	0.0628007	0.0411712	0.0315431	0.0571462	0.032536	0.0687408	0.0755922	0.0887451	0.0166667	0.0356757	0.047619	0.020453	0.0454545	0.123081	0.115661	0.0452489	0.0831502	0.0548341	0.0434783
Ntan1,Pdxdc1 - chr16:13834110	0.00481724	0.00827035	0.00723899	0.0089957	0.00424788	0.00443627	0.0060598	0.00417062	0.00573258	0.00396409	0.00876386	0.00823191	0.000913242	0.00785867	0.00445988	0.00120773	0.00526848	0.0145455	0.00252229	0.0109779	0.00277149	0.00327869
Samd8 - chr14:22617026	0.0772727	0.0351852	0.0269841	0.104073	0.0571429	0.0916179	0.115721	0.16888	0.0580808	0.0222222	0.0509913	0.0811688	0.033179	0.112741	0.13733	0.0776772	0.0585185	0.0707071	0.0499109	0.0290123	0.0460317	0.047619
Rapgef6 - chr11:54499732	0.0278218	0.0145755	0.0110623	0.00800345	0.00986935	0.0263352	0.0107831	0.0179605	0.00840837	0.0162353	0.0115088	0.00446429	0.0221024	0.0304657	0.0862014	0.0294771	0.017895	0.00932447	0.0234857	0.0172782	0.0237229	0.032527
9930104L06Rik,Cdca8 - chr4:124621545	0.37037	0.0333333	0.0151515	0.135185	0.0833333	0.0416667	0.107143	0.030303	0.0606061	0.0277778	0.0238095	0.105556	0.130719	0.230812	0.182234	0.196429	0.11859	0.113095	0.160256	0.0138889	0.0814394	0.0833333
Hnrnpm,March2 - chr17:33824244	0.120471	0.118475	0.130002	0.117775	0.128554	0.115518	0.125365	0.119569	0.211755	0.176008	0.116816	0.166667	0.0978836	0.261111	0.174747	0.103704	0.180952	0.150488	0.351852	0.238095	0.173789	0.169312
AC152453.1,Gm16268,Nt5dc3,Stab2 - chr10:86299089	0.0177422	0.0190537	0.0203853	0.0170509	0.0262336	0.022834	0.0172333	0.0183583	0.0214281	0.0212276	0.0224337	0.0158866	0.0179442	0.0209322	0.0293497	0.0239084	0.022212	0.0275805	0.0334714	0.0218135	0.0176109	0.0196101
Ccdc66,Fam208a - chr14:28296632	0.00462763	0.00621352	0.00654016	0.00576915	0.00953912	0.00601633	0.00569219	0.00622365	0.00718095	0.00390366	0.00747329	0.00675369	0.0042946	0.00578431	0.00564483	0.00400581	0.00517428	0.00576132	0.0122733	0.00466798	0.00675187	0.00546864
Gnl3l - chrX:147418358	0.00496903	0.00459177	0.00957709	0.0053586	0.00878769	0.00764948	0.0059775	0.00750584	0.00576377	0.00919911	0.00628606	0.00654461	0.00948337	0.00436039	0.00835197	0.00385686	0.00576743	0.00584578	0.0135807	0.00736216	0.00483242	0.00399075
Ash1l - chr3:88829240	0.376068	0.0833333	0.0545809	0.134894	0.030303	0.237037	0.0703704	0.132867	0.216667	0.210979	0.121693	0.266667	0.0666667	0.177778	0.259259	0.25	0.111111	0.0666667	0.373016	0.447619	0.333333	0.194444
Sdc4 - chr2:164251391	0.0543672	0.01907	0.0111111	0.0227623	0.0251662	0.0198693	0.0360192	0.0192447	0.059828	0.017934	0.0331336	0.0330584	0.0372036	0.0261257	0.0293359	0.0232179	0.0302237	0.0211423	0.0302075	0.0347672	0.019199	0.0281171
-,Cox7a2 - chr9:79603298	0.0298276	0.0216259	0.0253625	0.0200497	0.0142332	0.0115212	0.0192747	0.0253905	0.0453388	0.0179739	0.0213753	0.0198129	0.0226127	0.0223199	0.0259349	0.0148677	0.019594	0.0195976	0.0174076	0.0217139	0.0199116	0.0180968
Smarcc1 - chr9:110057924	0.166667	0.132576	0.0933063	0.152778	0.0939394	0.135417	0.354978	0.122727	0.0740741	0.136032	0.159823	0.2	0.269841	0.278388	0.166667	0.0666667	0.166667	0.0833333	0.0666667	0.4	0.177778	0.166667
Mrpl20 - chr4:155180406	0.150794	0.251282	0.274074	0.352964	0.122222	0.228846	0.230952	0.211601	0.113636	0.339115	0.234386	0.305556	0.388889	0.530556	0.179894	0.262037	0.283333	0.182828	0.177778	0.344872	0.203704	0.277778
Dnase2a,Mast1 - chr8:87435113	0.00949422	0.019062	0.0165774	0.0122202	0.0110158	0.0139197	0.0144148	0.0135385	0.0122903	0.0159713	0.0202619	0.00877193	0.013019	0.0290748	0.0104335	0.0190478	0.01607	0.0111028	0.0102205	0.0197772	0.00697409	0.0141732
Icam1 - chr9:20823983	0.0119641	0.0244099	0.0185997	0.0236007	0.0160996	0.0216735	0.0302673	0.0350795	0.018147	0.0328203	0.0244382	0.0163934	0.0338361	0.0447044	0.0339716	0.0195579	0.0143369	0.0111887	0.0400481	0.0330898	0.0208302	0.0115215
Icam1 - chr9:20823969	0.00902379	0.0192343	0.0110178	0.021014	0.0127814	0.0127377	0.0174792	0.0126289	0.0200991	0.022582	0.00984044	0.0214286	0.0276362	0.0334419	0.016074	0.0115268	0.00958776	0.00411523	0.0153645	0.0176471	0.00716846	0.00715001
Icam1 - chr9:20823973	0.00711888	0.0216693	0.00966267	0.0229816	0.021001	0.0174575	0.0217008	0.0160392	0.0162971	0.0231938	0.0175601	0.0234375	0.0383606	0.0366681	0.020417	0.017094	0.0107527	0.00421941	0.0243791	0.0228744	0.0147929	0.00520833
Cdk11b,Gm10563,Gm16023,Gm16024,Slc35e2 - chr4:154995574	0.00847345	0.0108961	0.0153684	0.0146432	0.0126951	0.0118611	0.0125962	0.0157843	0.0144802	0.0213858	0.0213197	0.0102141	0.00792222	0.0176881	0.0164105	0.00967935	0.0251225	0.00989609	0.00995466	0.0105909	0.0250558	0.0125041
Cdk11b,Gm10563,Gm16023,Gm16024,Slc35e2 - chr4:154995579	0.0147832	0.0110763	0.0159728	0.0138742	0.0143981	0.017045	0.0095585	0.0141558	0.0167464	0.021891	0.0250392	0.0198825	0.0127444	0.0151254	0.0200751	0.0119011	0.0284408	0.011453	0.0125455	0.0126713	0.0271003	0.0114811
-,Sppl2a - chr2:126718599	0.0107602	0.0222736	0.023166	0.0208599	0.0110885	0.012945	0.015154	0.00979371	0.0183905	0.0176293	0.0144352	0.0227143	0.018996	0.0187828	0.0169357	0.00839576	0.0309536	0.0088778	0.0136341	0.0221938	0.0156372	0.0127352
Ccnt1 - chr15:98388752	0.0185185	0.119984	0.107382	0.0835257	0.0820301	0.025987	0.0622896	0.0545314	0.0542929	0.0892056	0.0389247	0.133333	0.0666667	0.0277778	0.0883838	0.030303	0.257143	0.0925926	0.121212	0.141667	0.0892857	0.0666667
-,Sppl2a - chr2:126718582	0.00877689	0.0199887	0.0208617	0.0141984	0.0134116	0.0121228	0.0108331	0.010613	0.0141191	0.0118705	0.0157772	0.0190559	0.0193609	0.0250482	0.0253996	0.0112123	0.045357	0.0157774	0.0160992	0.0247105	0.0194847	0.0198505
Cdk11b,Gm10563,Gm16023,Gm16024,Slc35e2 - chr4:154995599	0.00947895	0.0105975	0.0141951	0.0119324	0.0188436	0.0161392	0.0181417	0.0122255	0.01544	0.0115724	0.0123592	0.0148844	0.0184069	0.0161175	0.0167238	0.0088211	0.0247655	0.0130097	0.0124066	0.0119366	0.0119064	0.00895547
Gm15614,Yes1 - chr5:32924858	0.416667	0.318182	0.253704	0.631944	0.301587	0.444444	0.359307	0.392552	0.341667	0.288095	0.396825	0.5	0.833333	0.444444	0.2	0.111111	0.666667	0.244444	0.111111	0.277778	0.333333	0.333333
Smg5 - chr3:88156598	0.00620975	0.0142654	0.0171392	0.0110651	0.0113208	0.0130413	0.0145559	0.0149849	0.0123774	0.0110116	0.00973102	0.0086872	0.0118826	0.0154986	0.0105819	0.0139808	0.0142199	0.010443	0.0152444	0.00742298	0.00707743	0.00723788
Sdhaf2 - chr19:10590898	0.00720441	0.017592	0.0146978	0.019019	0.00978654	0.0115337	0.0109673	0.0107318	0.0105662	0.0110587	0.0130758	0.00906306	0.0115012	0.0130142	0.0131766	0.0173088	0.0157098	0.00848451	0.01766	0.00903426	0.009822	0.0102687
Gnl3l - chrX:147418357	0.00897043	0.00973654	0.00970432	0.00967836	0.00764795	0.00689934	0.0125466	0.0131427	0.00782802	0.00845299	0.014389	0.00296736	0.00509197	0.00460764	0.00185185	0.0108342	0.00752628	0.00482278	0.0146553	0.00565559	0.00962237	0.00522232
Farsa,Mir7069 - chr8:87390658	0.00709529	0.0206826	0.0174429	0.0181625	0.0113514	0.00993961	0.0216968	0.0261499	0.0110074	0.0145915	0.00990344	0.00729927	0.00578035	0.008	0.0068551	0.0183143	0.0139273	0.00262467	0.0156518	0.0017094	0.00617284	0.0227688
Ttc5 - chr14:51396562	0.0119838	0.0167307	0.0164884	0.0173072	0.0130334	0.0122879	0.0169688	0.0186992	0.0155658	0.0151223	0.012396	0.00892816	0.0108477	0.0109688	0.0130666	0.0124033	0.0121927	0.00834524	0.019093	0.00981663	0.00981607	0.0105009
Ccnb2-ps,Zfp617,Zfp882 - chr8:74440097	0.046129	0.0644775	0.0552783	0.0743421	0.0640864	0.056905	0.0621109	0.0710399	0.0542417	0.0677234	0.0520562	0.0459643	0.071863	0.0597498	0.0473856	0.0566826	0.0536534	0.0376541	0.0502355	0.0587921	0.0677266	0.0332149
-,Car5b - chrX:160416362	0.0203779	0.0309851	0.0221525	0.0242305	0.0196329	0.0213135	0.0219296	0.0294899	0.0233446	0.0256115	0.0279884	0.0147723	0.0304621	0.0178591	0.0232604	0.0202356	0.0197369	0.0172067	0.0245438	0.0270026	0.017574	0.0134963
Rbm11 - chr16:75602100	0.00455872	0.00599591	0.00649669	0.0061666	0.00596243	0.00563486	0.00696074	0.00378356	0.00527985	0.00657074	0.00655011	0.00751395	0.00940406	0.00407552	0.00393037	0.00695023	0.00396368	0.00529352	0.00652546	0.00560257	0.00278511	0.00458031
Car5b - chrX:160416746	0.0136045	0.0119332	0.0174927	0.0173657	0.0143288	0.020096	0.0243317	0.0110023	0.0108188	0.0130059	0.0211609	0.0120968	0.0227087	0.0119032	0.0156963	0.0160372	0.00528085	0.00537634	0.0256767	0.0160911	0.00793651	0.00851732
Faf2 - chr13:54743698	0.00230089	0.00419045	0.00271951	0.00388025	0.00350824	0.00388437	0.00365888	0.00263527	0.00177177	0.00417714	0.00296677	0.00205761	0.00557062	0.00111857	0.00412343	0.00503308	0.00355847	0.00325203	0.00512185	0.00258502	0.00218741	0.00340445
Gnl3l - chrX:147419092	0.00244366	0.0161477	0.00890629	0.00958565	0.011855	0.0143944	0.0114344	0.00670581	0.00765348	0.0123567	0.0101982	0.00284091	0.00872521	0.0015873	0.00673238	0.00620697	0.00930233	0.00241546	0.0163917	0.00698995	0.00403911	0.00410727
AC154510.1,Zfp874b - chr13:67574014	0.0245045	0.0295312	0.0521508	0.0399049	0.0302759	0.0230849	0.0290179	0.038413	0.0341606	0.045261	0.0705123	0.0434982	0.0629205	0.0505096	0.0326531	0.0295267	0.0580357	0.0262626	0.0169492	0.056353	0.0162989	0.0345679
Mdc1,Nrm,Ppp1r18os - chr17:35995847	0.0109394	0.0160638	0.0224143	0.0163233	0.0122733	0.0186111	0.018018	0.015801	0.018971	0.0164182	0.0190369	0.0275224	0.0235134	0.0189806	0.0169534	0.0176707	0.0168162	0.0202528	0.0159853	0.0194455	0.0141455	0.0166166
Nosip,Rcn3 - chr7:52333676	0.00658888	0.0197293	0.0219022	0.0168825	0.0137211	0.0220315	0.0230772	0.0219466	0.0154035	0.0165808	0.025717	0.0324807	0.0345295	0.0233147	0.0218294	0.0069808	0.0173745	0.0133962	0.0133433	0.0145947	0.0104645	0.010001
Zyg11b - chr4:107901655	0.0156552	0.0210726	0.0244285	0.0225086	0.0117612	0.0269022	0.0190491	0.0135186	0.0150104	0.0178562	0.0199977	0.0215807	0.0208891	0.0137121	0.0139972	0.0113312	0.024842	0.0230925	0.0065242	0.0221873	0.0107441	0.0100877
Gm11613 - chr11:97505863	0.0296272	0.0627748	0.0496181	0.0596716	0.0406503	0.0484275	0.0520501	0.0465166	0.0482875	0.037671	0.0494609	0.0516409	0.0554099	0.0393088	0.0540795	0.031922	0.0550972	0.0361145	0.0415382	0.0545981	0.0355746	0.0346317
Gm11613 - chr11:97505865	0.0133015	0.0246706	0.025183	0.0204801	0.0118567	0.0140451	0.0203918	0.0114981	0.0188641	0.014089	0.0128556	0.0203833	0.0240002	0.0219314	0.0140725	0.0150331	0.027773	0.00941043	0.00572246	0.0283051	0.0123057	0.0142665
Zfp113 - chr5:138583293	0.00689504	0.00728572	0.0107539	0.00802803	0.00740185	0.00735708	0.0082192	0.00912276	0.00571119	0.00664873	0.00833301	0.00806452	0.00200803	0.00760298	0.00293255	0.00530255	0.00185185	0.00352168	0.00500768	0.00481029	0.0015015	0.00759462
-,Malt1 - chr18:65638102	0.00364012	0.00450287	0.00537775	0.0031507	0.00463851	0.00322262	0.00398753	0.00358997	0.00315119	0.00302496	0.00417257	0.00695529	0.00211741	0.00247494	0.000932425	0.00307985	0.00147687	0.00293851	0.00395794	0.0045513	0.00172504	0.00518518
Gm13031,Padi2 - chr4:140507433	0.0171801	0.0549672	0.0341365	0.0331387	0.0308639	0.035646	0.0280409	0.0311164	0.036731	0.0287509	0.025366	0.0423316	0.0139573	0.0165654	0.00679213	0.0149941	0.0106762	0.023665	0.0195979	0.0242712	0.00724922	0.0322889
Dnase2a,Mast1 - chr8:87435130	0.0203157	0.0278233	0.0366268	0.0388603	0.0303556	0.0363131	0.027684	0.026422	0.0345562	0.0330069	0.0268216	0.0352183	0.0365336	0.0197138	0.0181093	0.0198634	0.0327373	0.0187606	0.0276802	0.0456646	0.0130496	0.0336564
Fbxl17 - chr17:63401967	0.0452489	0.0859428	0.116936	0.0992624	0.0966711	0.1412	0.0846503	0.11301	0.0948375	0.128609	0.0849328	0.12443	0.109159	0.064644	0.0750796	0.0740263	0.109731	0.0883053	0.0684584	0.116387	0.0704314	0.11458
-,6230400D17Rik,Fut11,Gm25328,Sec24c - chr14:21516754	0.0249723	0.0357356	0.0345686	0.0391613	0.0278259	0.0314724	0.0280769	0.0337064	0.0329423	0.041585	0.0389469	0.0227359	0.0263417	0.0317537	0.0309408	0.0206912	0.0320366	0.0329479	0.0295258	0.0365011	0.0266196	0.0458765
-,Malt1 - chr18:65638103	0.00624633	0.013431	0.00980848	0.0086125	0.00824876	0.00823475	0.00814018	0.00895722	0.0107753	0.0137394	0.00922354	0.0108379	0.00484618	0.00796707	0.0090018	0.00844757	0.00717377	0.00724674	0.00751724	0.0113067	0.00584074	0.0126482
Ap4e1,Gm24081 - chr2:126862724	0.00301715	0.0052397	0.00333416	0.00296904	0.00521301	0.00367409	0.00399661	0.00397121	0.00251058	0.00345264	0.00419079	0.00319941	0.00239089	0.00310102	0.00398252	0.00233404	0.0041504	0.0034262	0.00382398	0.00484853	0.00339205	0.00350548
Rps19-ps3,Zfp933 - chr4:147199127	0.103381	0.155004	0.113911	0.125027	0.151723	0.187833	0.187036	0.165828	0.11293	0.169536	0.159685	0.130252	0.102217	0.1185	0.0687938	0.120726	0.101136	0.16049	0.152513	0.210685	0.137548	0.104365
Cpsf4l - chr11:113561986	0.0111978	0.0241346	0.0214437	0.0283581	0.0212791	0.0210455	0.0294376	0.0239087	0.0223917	0.0205608	0.0242833	0.0378151	0.0271883	0.0200194	0.0170148	0.00574713	0.021151	0.0251045	0.0239332	0.0102909	0.0113004	0.0103071
-,Car5b - chrX:160416361	0.0143545	0.0238394	0.0220707	0.0203358	0.0248692	0.0229236	0.0270631	0.0305369	0.0225645	0.0226274	0.0210402	0.0371677	0.0168973	0.0143358	0.0134153	0.00990892	0.0277253	0.0244884	0.0215968	0.0224683	0.00888889	0.0189734
Dcdc2b,Tmem234 - chr4:129285029	0.0195024	0.0454065	0.035439	0.0364586	0.0323252	0.0333103	0.0363995	0.0404761	0.0344898	0.0339322	0.0335195	0.0417203	0.0216213	0.0302067	0.0237296	0.0246089	0.0377	0.0249029	0.0266385	0.0229891	0.0326524	0.0286961
-,Car5b - chrX:160416419	0.00235571	0.0300627	0.0227933	0.0189747	0.0166777	0.0186961	0.0256498	0.0233491	0.0111719	0.0150815	0.0168819	0.0222222	0.00701907	0.00606061	0.0123744	0.010397	0.00751659	0.0189903	0.00760641	0.0141272	0.0109605	0.00653595
AC153962.3 - chr10:33709058	0.27619	0.794444	0.666667	0.628788	0.716667	0.9	0.688889	0.488095	0.626984	0.805556	0.75	0.5	0.666667	0.611111	0.333333	0.333333	0.5	0.666667	0.333333	0.555556	0.333333	0.666667
Pxmp4 - chr2:154412857	0.00867036	0.0194796	0.011196	0.0199199	0.0117509	0.0147786	0.0171746	0.0132461	0.0130585	0.0147611	0.0136473	0.00914657	0.0157394	0.0113426	0.00916253	0.00375345	0.0115542	0.0131998	0.00825495	0.0110474	0.00907891	0.0158328
Nol10 - chr12:17436491	0.0332921	0.0856726	0.0550011	0.0530082	0.0393	0.0673788	0.0698142	0.0688839	0.0622707	0.063975	0.0572834	0.0517429	0.0532999	0.0343226	0.0300477	0.0102954	0.0423015	0.0424431	0.0293047	0.0639179	0.0664422	0.0270833
-,Sppl2a - chr2:126718597	0.025758	0.0588733	0.0348368	0.042099	0.0345112	0.041742	0.0365502	0.0334842	0.039383	0.0411485	0.0421953	0.0265739	0.0474143	0.0368278	0.0356637	0.0192178	0.0401162	0.0316473	0.0246701	0.0406017	0.0327078	0.0253306
Dync1i2 - chr2:71067254	0.0190923	0.0202464	0.0237245	0.0334418	0.0251518	0.0342567	0.02674	0.0177824	0.0256082	0.0327817	0.0290399	0.0140187	0.0247521	0.0123457	0.0232579	0.0103642	0.00919582	0.0169257	0.0231919	0.0256341	0.0200976	0.00994624
A930015D03Rik,H2-T24 - chr17:36143417	0.00740842	0.0045382	0.00739115	0.00787366	0.00675891	0.0101906	0.00856557	0.00856816	0.00864474	0.00795477	0.00939846	0.00378788	0.00269087	0.004371	0.00379477	0.0016835	0.00536181	0.00388237	0.00758566	0.00960285	0.00473375	0.00233906
Fbxo30 - chr10:11016172	0.102222	0.175233	0.232434	0.22093	0.187821	0.179496	0.259935	0.21922	0.291392	0.196269	0.288795	0.0454545	0.0873828	0.0436508	0.071182	0.040404	0.113642	0.0644911	0.067433	0.0882421	0.0700855	0.0789341
Stxbp2 - chr8:3643466	0.0129408	0.0146443	0.0184169	0.0175986	0.0188294	0.0142485	0.018291	0.0133457	0.0226277	0.0179682	0.0216652	0.0129764	0.0140917	0.00976796	0.0138946	0.0111545	0.0154539	0.0111051	0.0127658	0.0105156	0.00966211	0.00917547
Slc2a3 - chr6:122689308	0.00572627	0.00658082	0.00835535	0.00792507	0.00717434	0.00578131	0.00829958	0.00636926	0.00650552	0.0078652	0.00807261	0.00336341	0.00331125	0.00371399	0.00358931	0.0030803	0.0041543	0.00364217	0.00518576	0.000880312	0.00279213	0.00209483
Atat1,Gm16279,Mrps18b,Ppp1r10 - chr17:36048824	0.0155622	0.025571	0.0269958	0.0247653	0.0265882	0.0235804	0.0246248	0.0228144	0.0261627	0.0299671	0.0274787	0.00984971	0.0177256	0.010937	0.0172378	0.0105088	0.0171898	0.00858231	0.0169674	0.016489	0.0154861	0.0112248
Atat1,Gm16279,Mrps18b,Ppp1r10 - chr17:36048819	0.0227052	0.0353094	0.0387876	0.0380889	0.0389735	0.0347583	0.0347601	0.0329997	0.0333213	0.032437	0.0352402	0.0131377	0.0190348	0.019431	0.021054	0.0199639	0.0167652	0.0170097	0.023786	0.0190196	0.0155114	0.0128361
Atat1,Gm16279,Mrps18b,Ppp1r10 - chr17:36048838	0.0298155	0.0468664	0.0515971	0.0465022	0.0483389	0.0454494	0.0468292	0.0460162	0.0540787	0.0489325	0.0459886	0.0191973	0.0305486	0.0285915	0.0309316	0.0277536	0.0292105	0.0298891	0.031746	0.0307211	0.026456	0.0203045
Cdk11b,Gm10563,Gm16023,Slc35e2 - chr4:154996480	0.177419	0.229425	0.221463	0.212476	0.301587	0.200709	0.272358	0.163805	0.262963	0.286575	0.318669	0.0294118	0.116605	0.14143	0.102263	0.0983267	0.132304	0.0965562	0.0640831	0.0933007	0.122835	0.101109
Gtpbp3,Plvap - chr8:74016965	0.0383948	0.0365519	0.049821	0.0346818	0.0620133	0.0524286	0.0615826	0.0369914	0.0472295	0.059421	0.0536308	0.0127551	0.016593	0.0211452	0.0197752	0.0136438	0.00890579	0.0170651	0.0295833	0.0172981	0.0210188	0.0237242
A930015D03Rik,H2-T24 - chr17:36143426	0.0146029	0.018412	0.0215406	0.0244204	0.0153376	0.0208281	0.0222103	0.0223476	0.0239756	0.0226862	0.0253243	0.0151846	0.0177261	0.0145076	0.0157604	0.00951922	0.0159146	0.00936373	0.0134453	0.0169616	0.0143229	0.0143647
Gm26446,Ppp1r7 - chr1:95263372	0.00207637	0.00791331	0.00920201	0.00835246	0.00424651	0.0108125	0.00925195	0.00839975	0.00813308	0.00604397	0.00956155	0.0048378	0.00435914	0.00380281	0.00498454	0.00249057	0.00696838	0.00264258	0.00377814	0.00479095	0.00457825	0.00804004
Mdc1,Nrm,Ppp1r18os - chr17:35995864	0.0195418	0.0280426	0.0316954	0.0319093	0.0263687	0.0328648	0.0348341	0.0255921	0.0288375	0.0268637	0.0273353	0.0229155	0.0225984	0.0226803	0.0144796	0.0218115	0.0222918	0.0182484	0.0217529	0.0290334	0.0197737	0.0192331
-,Rmi2 - chr16:10842111	0.0231592	0.0343937	0.0364659	0.0401555	0.0390659	0.0456998	0.0453268	0.0545246	0.0412568	0.0358584	0.0395781	0.0306928	0.0355809	0.0307625	0.0282595	0.0237952	0.0256366	0.00712286	0.0333518	0.0271991	0.0353493	0.0277142
Gm12953,Tmem69 - chr4:116224779	0.029556	0.0612711	0.0775831	0.0655106	0.0527678	0.0478792	0.0711327	0.0789892	0.0594386	0.0600916	0.0479162	0.0276272	0.0332799	0.0437304	0.0275435	0.0413851	0.0329275	0.0107018	0.0397518	0.0329756	0.0423264	0.0307244
Rgl2,Tapbp - chr17:34065499	0.0174781	0.0262781	0.0199826	0.0222534	0.0210308	0.0210289	0.0223438	0.0214955	0.0273575	0.0247221	0.0265277	0.00785024	0.0156485	0.0140694	0.0156729	0.0105726	0.013915	0.0192393	0.0113372	0.0165646	0.0127637	0.0216375
Gm12953,Tmem69 - chr4:116224887	0.00800609	0.00835502	0.0118579	0.00912757	0.00928189	0.0158106	0.0139119	0.0100136	0.0136349	0.00957784	0.0147846	0.00277969	0.00725118	0.00680135	0.00832725	0.00354641	0.00217704	0.00623475	0.00479712	0.00496438	0.00731115	0.00726822
Slc2a3 - chr6:122689292	0.0107335	0.0166432	0.0149773	0.0147272	0.0127824	0.014494	0.0128752	0.013924	0.0154734	0.0134296	0.0178786	0.00818405	0.0104543	0.0127145	0.0124562	0.0111423	0.00885512	0.00982214	0.0111803	0.0114353	0.0111287	0.011114
Agl - chr3:116447015	0.128254	0.200823	0.188021	0.22336	0.148434	0.202919	0.195978	0.204816	0.212698	0.165006	0.183977	0.147076	0.159867	0.0886462	0.140852	0.109796	0.141286	0.184336	0.126936	0.111621	0.116375	0.142215
Tmem209 - chr6:30432039	0.10988	0.157284	0.111933	0.169591	0.133267	0.129352	0.131605	0.152156	0.115807	0.100679	0.1266	0.122246	0.0551207	0.0434748	0.0810347	0.0640409	0.0607211	0.0877336	0.0686508	0.028259	0.0726228	0.0940837
Hmmr - chr11:40516085	0.0154759	0.0205839	0.0282205	0.0275251	0.0247307	0.0223495	0.028431	0.0305653	0.0261758	0.0206371	0.0267537	0.0133672	0.00897764	0.012885	0.0151548	0.0181864	0.00740247	0.0124917	0.0202527	0.0128806	0.012312	0.0158517
Gm28539,Hira,Mrpl40 - chr16:18872218	0.0273113	0.0262838	0.0518993	0.0414785	0.0321982	0.0518764	0.0312543	0.0474746	0.0346371	0.0391372	0.0434407	0.00699848	0.0198882	0.00204499	0.010101	0.0130807	0.00744048	0.00802749	0.00983584	0.0119446	0.0108225	0.0145913
Gm42457,Gm42893,Mfsd14a,Sass6 - chr3:116332480	0.00396947	0.00442173	0.00621374	0.00664783	0.00501201	0.00579299	0.00477771	0.00639648	0.00730074	0.00361316	0.00373538	0.0012772	0.00260123	0.00204716	0.00149169	0.00184654	0.00117707	0.00158069	0.00127517	0.00200134	0.000400641	0.0014534
Rc3h2,Zbtb6 - chr2:37282118	0.0102703	0.0173922	0.023372	0.0271583	0.0214262	0.0197855	0.0164323	0.0169408	0.019871	0.0158466	0.0206553	0.00268817	0.00706422	0.00780851	0.00716685	0.00838238	0.0066191	0.00766104	0.00510594	0.0052723	0.0071083	0.00862985
Rgl2,Tapbp - chr17:34065477	0.00812811	0.0119386	0.00730432	0.00821753	0.0118221	0.0110973	0.00616193	0.00841729	0.0108361	0.0067922	0.0125315	0.00405615	0.00714911	0.0031483	0.00112798	0.00463596	0.00580354	0.00327874	0.00760966	0.00504441	0.00268988	0.00666558
AC152453.1,Gm16268,Nt5dc3,Stab2 - chr10:86299084	0.0298068	0.0324557	0.0286597	0.0269285	0.0343572	0.0348092	0.0306665	0.0332145	0.0398183	0.0323384	0.0340183	0.0166529	0.0254681	0.0220544	0.0286568	0.0238966	0.0223215	0.030531	0.0341372	0.0213294	0.0210195	0.0211927
-,Rmi2 - chr16:10840987	0.0227919	0.0294673	0.0195898	0.0183722	0.0290857	0.0348424	0.0294665	0.03299	0.0265504	0.0299112	0.0245265	0.00632911	0.0240821	0.0116557	0.0151385	0.0129505	0.0127954	0.0210526	0.0253378	0.0141302	0.0176981	0.0238263
Utp6 - chr11:79747585	0.0411224	0.068952	0.0470637	0.0327578	0.0518255	0.0445913	0.0284491	0.0467349	0.0697735	0.0583734	0.0261073	0.02	0.0357246	0.0345171	0.0304192	0.0373017	0.00903541	0.0208232	0.0333382	0.0222218	0.0364224	0.0407276
Azin1,Mir6951 - chr15:38422000	0.109722	0.160256	0.137529	0.116097	0.186988	0.0964194	0.138591	0.127976	0.176984	0.115476	0.0555556	0.03125	0.0707071	0.0190476	0.0383772	0.0842593	0.0791246	0.111111	0.114773	0.047619	0.0266667	0.0222222
Gm26693,Zfp799 - chr17:32955775	0.00694506	0.0123653	0.0125825	0.0124875	0.00915	0.0161063	0.00754389	0.00708269	0.0146465	0.0150746	0.0116176	0.00488166	0.00586758	0.0128207	0.00834646	0.00797934	0.0116377	0.0146518	0.0127841	0.0031746	0.00516715	0.00528902
Rgl2,Tapbp - chr17:34065524	0.100716	0.172919	0.139138	0.184365	0.141658	0.151359	0.139188	0.155873	0.157049	0.146756	0.168311	0.131313	0.131116	0.169564	0.0975444	0.0953126	0.102062	0.138709	0.1772	0.133603	0.116584	0.142407
-,Sppl2a - chr2:126718655	0.0153467	0.0276341	0.0242865	0.0235856	0.0246556	0.0218383	0.0117059	0.023128	0.0263199	0.017354	0.0197047	0.0203392	0.0104263	0.0215696	0.00666897	0.00910986	0.0121059	0.0250513	0.0119627	0.0192021	0.0166951	0.00866844
N4bp2l2 - chr5:151450877	0.0645936	0.0902878	0.119414	0.117691	0.0945931	0.100714	0.0786368	0.109341	0.101758	0.101513	0.0950584	0.0766386	0.0731507	0.108993	0.0796838	0.0828726	0.0757535	0.094134	0.0749934	0.105809	0.0808186	0.0845102
Aida,Mia3 - chr1_random:297723	0.0122417	0.0219721	0.0192041	0.0218451	0.01606	0.0178793	0.0171743	0.0233529	0.0106184	0.0213921	0.0224082	0.0111111	0.0206333	0.00816993	0.01488	0.00813008	0.00462963	0.0232669	0.011236	0.00333333	0.00701754	0.0191021
Rnf168 - chr16:32299980	0.0222784	0.0292782	0.0385298	0.0576559	0.0427887	0.0303452	0.0466241	0.0607472	0.0379107	0.0269997	0.0385731	0.0291382	0.0438921	0.023635	0.025273	0.0144996	0.0259257	0.0611873	0.0337151	0.0343687	0.0315948	0.0483198
Agl - chr3:116447000	0.00232155	0.0104888	0.0132945	0.0138753	0.010909	0.0132161	0.00945271	0.0127742	0.00799218	0.00740786	0.00693345	0.00884973	0.00711728	0.00413292	0.0106229	0.00696442	0.00526406	0.0112462	0.00727828	0.00435508	0.0112782	0.0115181
Sod2 - chr17:13209679	0.00456101	0.00954788	0.0104556	0.00939558	0.0122166	0.0111964	0.00922413	0.00899323	0.00580287	0.00929953	0.0102835	0.00195312	0.00497095	0.00773735	0.00674583	0.00794593	0.00327667	0.00630389	0.00564292	0.00618732	0.00315972	0.00566924
A930015D03Rik,H2-T24 - chr17:36143429	0.00380992	0.0045927	0.00855144	0.00911813	0.00839324	0.00531835	0.00440244	0.00692214	0.00587489	0.00702713	0.00446063	0.00281756	0.00114852	0.00352324	0.00810686	0.00565107	0.002715	0.00360289	0.00344468	0.00328929	0.0040572	0.00337347
Apopt1,Gm15996 - chr12:112972281	0.0151483	0.0118351	0.0150591	0.0190509	0.0116043	0.0185725	0.0116107	0.0138562	0.0188258	0.0148958	0.0125774	0.008379	0.00456654	0.00734726	0.0167793	0.00787415	0.00510842	0.00834379	0.011011	0.0129773	0.00920919	0.0200697
Mbnl1 - chr3:60430062	0.455556	0.685185	0.801587	0.894444	0.730519	0.760714	0.622222	0.633333	0.944444	0.922078	0.719048	0.25	0.722222	0.5	0.833333	0.7	0.333333	0.25	0.805556	0.666667	0.666667	1
Gm12953,Tmem69 - chr4:116224841	0.00259589	0.00165017	0.00281164	0.0039981	0.00478675	0.00622567	0.00752702	0.00724617	0.00293372	0.00675905	0.00755922	0.00168067	0.00477711	0.0058359	0.00179247	0.0035495	0.00284217	0.0033532	0.00164933	0.00302727	0.00395576	0.00246956
-,Isg20l2 - chr3:87744085	0.0504762	0.0828551	0.135351	0.0812891	0.0687447	0.102908	0.117065	0.116028	0.0844786	0.0972881	0.0806964	0.0318139	0.0173611	0.0588486	0.0294509	0.0268102	0.0255624	0.0401553	0.0348093	0.0687443	0.0327869	0.0153207
Gm12953,Tmem69 - chr4:116224788	0.0240469	0.0410642	0.0451311	0.0673141	0.0635344	0.0447522	0.0459934	0.0803847	0.0332086	0.0530356	0.0652941	0.0175545	0.00768818	0.0247867	0.0190988	0.0165148	0.016271	0.0178022	0.0280741	0.0223132	0.0148102	0.00884336
Gm12953,Tmem69 - chr4:116224858	0.00698472	0.0123962	0.00835551	0.0114596	0.010281	0.0159624	0.0137336	0.0150473	0.00885878	0.0124279	0.0102028	0.00346934	0.00550104	0.00527583	0.00771022	0.00171669	0.00638065	0.00342915	0.00435317	0.00306697	0.00228261	0.00272805
Gla,Rpl36a - chrX:131123139	0.129365	0.230159	0.132317	0.172677	0.246187	0.102822	0.238596	0.254831	0.153166	0.336171	0.154286	0.14697	0.139394	0.230134	0.164717	0.14652	0.0787037	0.173611	0.130556	0.126706	0.0847222	0.0238095
-,Gm11613 - chr11:97506872	0.0189709	0.0261914	0.0277827	0.0207877	0.0254493	0.0337806	0.0339099	0.028898	0.0274267	0.0407403	0.0315714	0.0222083	0.0241937	0.0240749	0.0246872	0.0131487	0.0162239	0.0242142	0.0150936	0.0222426	0.0186321	0.0222879
Gnl3l - chrX:147419161	0.0143084	0.0447585	0.0303019	0.0297319	0.0385915	0.0367222	0.0374526	0.0314367	0.0412894	0.0619781	0.0291029	0.00746269	0.0207233	0.035873	0.0262973	0.0215155	0.0217892	0.02171	0.00890091	0.0289923	0.012699	0.0237607
Adam1a,Gm42878,Mapkapk5,Tmem116 - chr5:121974262	0.0124299	0.00733838	0.00942249	0.0104016	0.0133243	0.0104432	0.0138448	0.0110681	0.00830256	0.0112957	0.00929177	0.00499903	0.00703517	0.0120651	0.0115115	0.00783316	0.00937969	0.0152674	0.00624339	0.00859063	0.00426839	0.0066367
Mdc1,Nrm,Ppp1r18os - chr17:35995835	0.00530064	0.00655331	0.00652222	0.0096072	0.00663645	0.00725565	0.00978121	0.00788947	0.00579683	0.00676667	0.00757611	0.0070308	0.00651693	0.00923247	0.004253	0.000923361	0.00527639	0.0111418	0.00737382	0.00728828	0.00283462	0.00552905
-,Car5b - chrX:160416386	0.02191	0.029145	0.0240239	0.0238977	0.0212184	0.0300313	0.033548	0.0334037	0.0215763	0.0229381	0.0300852	0.029581	0.0240416	0.0207013	0.0195633	0.0185184	0.020816	0.0383533	0.0214839	0.023508	0.0101012	0.0161561
Tln2 - chr9:67067141	0.0128265	0.0118749	0.0129124	0.0158938	0.0142336	0.0168142	0.0147818	0.0172928	0.01107	0.0124991	0.0115456	0.00996279	0.00927466	0.00677252	0.00751447	0.0104337	0.00885532	0.0110675	0.0108202	0.0127101	0.0109761	0.00787127
Gnl3l - chrX:147418359	0.0345559	0.0338843	0.0422779	0.0541678	0.0427429	0.0504009	0.0486993	0.0530745	0.0455566	0.0447418	0.0445998	0.0239788	0.0348383	0.0349291	0.0306135	0.0401989	0.0318714	0.0416214	0.0332864	0.0413425	0.0295763	0.0256702
Klhl7,Nupl2 - chr5:23666928	0.0109171	0.0163002	0.0149186	0.0179962	0.0102894	0.0211768	0.0142482	0.0183513	0.0153452	0.0124992	0.010527	0.0110632	0.0131805	0.0099273	0.0114052	0.00781638	0.00580745	0.015481	0.0110827	0.0100587	0.0114158	0.00669965
Noc3l,Plce1 - chr19:38862842	0.0316291	0.0420395	0.0381308	0.0380943	0.0244269	0.0435108	0.0374181	0.0475769	0.0418553	0.0403828	0.030952	0.0239379	0.0205414	0.0283415	0.0119266	0.0307594	0.0217114	0.0352846	0.0158922	0.0230154	0.018456	0.0214555
Coro7,Dnaja3 - chr16:4660986	0.00416242	0.0101252	0.00804679	0.010836	0.0126902	0.0169172	0.0104393	0.0116314	0.0122405	0.0124084	0.0156097	0.00980384	0.00874055	0.00802905	0.00953773	0.00605599	0.00494957	0.0160381	0.00825825	0.00536668	0.00944188	0.00726649
Rnf168 - chr16:32299974	0.150522	0.177758	0.204158	0.237357	0.244405	0.243014	0.260087	0.227084	0.236892	0.20036	0.237103	0.168386	0.151244	0.170696	0.176121	0.152921	0.198953	0.168603	0.128738	0.127701	0.175579	0.150744
Rbm41 - chrX:136479944	0.0121379	0.0118251	0.0131351	0.0140452	0.0155885	0.0210677	0.0195199	0.0210122	0.0162916	0.018899	0.0220513	0.0123048	0.0138114	0.0138742	0.0138103	0.0124531	0.017135	0.0161115	0.0121879	0.0108447	0.00982045	0.00763697
Rab2a - chr4:8534651	0.025641	0.0567595	0.0546848	0.0353261	0.039623	0.037037	0.025641	0.0599473	0.0498188	0.0263158	0.0525253	0.0260672	0.0428931	0.0310563	0.0289146	0.0293631	0.0332729	0.0329026	0.0265123	0.0232704	0.0232418	0.0373765
-,Bri3bp - chr5:125937620	0.0279229	0.0522314	0.0421425	0.0383545	0.0408344	0.03291	0.0335646	0.0387899	0.0418372	0.0394915	0.0389791	0.0218571	0.0312092	0.0256356	0.0266193	0.0259756	0.0233777	0.0267714	0.0261048	0.0274697	0.03042	0.0220525
Akap8 - chr17:32441536	0.0123457	0.0332279	0.0224786	0.0108925	0.0193569	0.0192886	0.00696565	0.0220969	0.0267007	0.0331657	0.0301302	0.00438596	0.0141026	0.00501253	0.003367	0.00606261	0.00952381	0.00490196	0.0045045	0.00445712	0.00940623	0.00669075
Gm43062,Nras - chr3:102870649	0.00615865	0.0209757	0.0111682	0.014835	0.0130473	0.0111544	0.0103925	0.0166895	0.0169033	0.00957784	0.0174183	0.00969257	0.00458104	0.0062182	0.00710577	0.00911165	0.0110721	0.0119339	0.00785745	0.00587674	0.00643964	0.00687985
Slfn5,Slfn5os - chr11:82776154	0.0113741	0.019973	0.0160339	0.0172735	0.0172258	0.0139496	0.0161869	0.0219303	0.0228213	0.0151731	0.0188981	0.0154213	0.0137344	0.0159217	0.0111938	0.0121338	0.0144332	0.00891538	0.0148337	0.0110601	0.0100397	0.0119517
Gm37986,Taf1a - chr1_random:383211	0.0367009	0.0811126	0.0429	0.0769716	0.0454699	0.0555441	0.0622059	0.0710279	0.0652434	0.0532589	0.0666618	0.0495785	0.0415826	0.025894	0.0235507	0.031893	0.029369	0.0222125	0.0599206	0.018586	0.0206976	0.0314153
Bscl2,Lrrn4cl - chr19:8928073	0.0308972	0.0524806	0.0496506	0.0627332	0.0494357	0.0347569	0.0499111	0.0432633	0.0710232	0.0235496	0.0328055	0.0227273	0.0201347	0.0176201	0.0242396	0.0297632	0.015409	0.0181807	0.0171342	0.0318373	0.0340463	0.0462577
Nol10 - chr12:17436414	0.0151106	0.030785	0.0247956	0.0446269	0.0358627	0.0287096	0.0230032	0.028734	0.0402458	0.0275507	0.0238216	0.0118397	0.0346673	0.0136774	0.0212236	0.0119881	0.0144501	0.0138129	0.0237408	0.00811867	0.031606	0.021558
Pxmp4 - chr2:154412895	0.00348598	0.0036487	0.00292195	0.00583259	0.00293113	0.00394332	0.00265741	0.00447431	0.00569358	0.00481935	0.00380756	0.00214465	0.00197217	0.00117835	0.00140361	0.00142514	0.000971221	0.000989207	0.00148812	0.00107336	0.00212426	0.00147746
Pxmp4 - chr2:154412896	0.00801949	0.0102963	0.0100314	0.0116033	0.0105984	0.0101563	0.0118322	0.00767853	0.0089823	0.00878795	0.00768818	0.0052492	0.00473748	0.00564407	0.00589524	0.00781602	0.00365426	0.00373036	0.00529158	0.00528364	0.00358516	0.00346922
Nol10 - chr12:17436466	0.0219489	0.0463664	0.0426562	0.0450624	0.0364347	0.0444273	0.045833	0.0376119	0.0458301	0.0385041	0.0452992	0.0216841	0.0233805	0.0265774	0.0282962	0.0245239	0.0217506	0.0194829	0.0196643	0.0256346	0.0215752	0.0265628
Gm23250,Tmod1,Tstd2 - chr4:46128079	0.00756475	0.0190576	0.0145998	0.0195847	0.0108896	0.0163987	0.0152873	0.0139731	0.017038	0.0144824	0.0152918	0.00669978	0.00713402	0.0073234	0.00833541	0.00552614	0.00770642	0.00595976	0.00737908	0.00485557	0.00552079	0.00839682
Nol10 - chr12:17436472	0.0281022	0.0411646	0.0372898	0.045605	0.0359393	0.0371991	0.0452975	0.0375799	0.0396917	0.0399466	0.0409265	0.0145275	0.0174446	0.0300617	0.0206739	0.015695	0.0155852	0.0226614	0.019859	0.0173668	0.016574	0.0160542
Nol10 - chr12:17436477	0.023632	0.0401436	0.0262144	0.0355528	0.0316714	0.0378545	0.0350492	0.0295196	0.0398766	0.0319874	0.0350859	0.014797	0.0201011	0.0257852	0.0227808	0.0106062	0.0177403	0.0121382	0.013209	0.0169834	0.0183002	0.0163813
Nol10 - chr12:17436481	0.0244959	0.0418908	0.038153	0.0366269	0.0325844	0.0360607	0.0417171	0.0353712	0.0304799	0.0313572	0.0387406	0.0186603	0.0172069	0.0269804	0.0301709	0.0119048	0.0117915	0.0126175	0.0234642	0.0161383	0.0287388	0.0143511
Ttc5 - chr14:51396566	0.00588574	0.0149036	0.0171914	0.0159332	0.0104023	0.0137524	0.0169528	0.0130175	0.0146846	0.00996812	0.014268	0.00579903	0.00596218	0.0083886	0.00771384	0.00440974	0.00371131	0.00903303	0.00842648	0.00484376	0.00801771	0.00530536
2310039H08Rik,Gm26904,Rpl7l1 - chr17:46911871	0.00571362	0.0151861	0.0119401	0.0129669	0.0139936	0.00934371	0.0166421	0.0154917	0.0148492	0.0100273	0.0126817	0.00537883	0.00861873	0.00559041	0.00847591	0.00597006	0.00490972	0.00661889	0.00610047	0.00389286	0.0106179	0.00684521
Slc35e1 - chr8:75005892	0.00989973	0.0187768	0.0166325	0.0163045	0.0201894	0.0125909	0.0176458	0.0145056	0.0181138	0.0152041	0.0150984	0.00642518	0.00553893	0.0103216	0.00510812	0.0108674	0.00690004	0.00437282	0.00740487	0.007204	0.0106166	0.00976855
Calr,Rad23a - chr8:87366067	0.0363537	0.0813169	0.0676785	0.0618099	0.0332229	0.0646207	0.0769552	0.0438232	0.0672273	0.044159	0.0781312	0.0314214	0.0376518	0.0468093	0.0441084	0.0373956	0.0379088	0.0363359	0.0361617	0.032599	0.0351704	0.0449798
Trim36 - chr18:46325572	0.00638292	0.00737653	0.0101186	0.00908293	0.00699292	0.0104199	0.00846956	0.00673139	0.00762405	0.00845067	0.00654795	0.00416034	0.00873593	0.00630351	0.00586391	0.00601771	0.00589709	0.00467828	0.00458035	0.0057956	0.00513015	0.00436724
Ccnc,Tstd3 - chr4:21685175	0.0187353	0.0244952	0.0323305	0.0327722	0.0266588	0.0299876	0.0416004	0.0239156	0.021827	0.0236598	0.0303757	0.017079	0.0238582	0.0198677	0.0218446	0.0218723	0.0170718	0.0196681	0.0132543	0.0125689	0.0145603	0.0187603
-,Cbln3,Khnyn - chr14:56500451	0.00759416	0.00789029	0.00697993	0.00670873	0.00426205	0.00743774	0.0115117	0.00744861	0.00688662	0.0069349	0.00621273	0.0015873	0.00457335	0.00338229	0.00547032	0.00213705	0.00340246	0.00345047	0.00652956	0.00552131	0.00282062	0.00499809
Mdc1,Nrm,Ppp1r18os - chr17:35995902	0.00504771	0.0111825	0.0105613	0.0064731	0.00677124	0.0129292	0.00913955	0.00900659	0.00663202	0.00755274	0.0111789	0.00534202	0.00447329	0.00304371	0.00154723	0.00288774	0.00498772	0.00197239	0.003367	0.00529532	0.00307568	0.00572782
Slc2a3 - chr6:122689295	0.00667074	0.0139617	0.0109151	0.00958514	0.0060106	0.0145147	0.0113327	0.0109935	0.0105811	0.0115617	0.0108404	0.0051166	0.00650896	0.00594167	0.00536156	0.00448255	0.00656132	0.00451788	0.00571155	0.00479471	0.00482313	0.00636024
AC152453.1,Gm16268,Nt5dc3,Stab2 - chr10:86299040	0.0104002	0.0162424	0.0199098	0.0209693	0.0156121	0.012465	0.0175738	0.0135003	0.0204665	0.0208708	0.0106738	0.00816509	0.0148868	0.0187158	0.00804585	0.00926785	0.0108621	0.00833345	0.0118852	0.00670296	0.0148292	0.00652204
-,Nmnat1 - chr4:148842470	0.0047619	0.0141642	0.0217892	0.0134606	0.00297619	0.0189466	0.010189	0.00889315	0.0221194	0.0147881	0.00248756	0.00195312	0.0126622	0.00456258	0.00277778	0.00219298	0.00764256	0.0045045	0.0101036	0.00944187	0.00801155	0.00485625
Vps53 - chr11:75875719	0.00492691	0.00927023	0.00886534	0.0110524	0.00693404	0.0158993	0.0105888	0.0108611	0.0102988	0.00820162	0.00934276	0.00913309	0.00324089	0.00899486	0.00729711	0.00255952	0.013622	0.00429954	0.00578292	0.0119771	0.00864117	0.00604782
Acad12 - chr5:122052970	0.0104575	0.0220753	0.0189719	0.0272068	0.0124034	0.0284532	0.0205474	0.0205138	0.0212649	0.0176995	0.0179286	0.0085855	0.0209235	0.0178923	0.0175403	0.0184647	0.026109	0.0117183	0.0173978	0.0214226	0.024028	0.0136983
Slc25a42,Tmem161a - chr8:72709037	0.00627301	0.011212	0.00991746	0.00916765	0.00709818	0.0115349	0.0136766	0.00481846	0.0110291	0.0102248	0.010219	0.00609562	0.00913152	0.0138663	0.0089005	0.00751471	0.010081	0.00728897	0.00444734	0.00650747	0.00811874	0.00579935
-,Sppl2a - chr2:126718584	0.0123395	0.0172597	0.0130336	0.0121754	0.00698019	0.019768	0.0180365	0.0135491	0.0172716	0.0104922	0.0161257	0.00775194	0.0136308	0.0193939	0.00820275	0.00531915	0.018277	0.0126603	0.00417852	0.0194269	0.0112279	0.00234742
-,Sppl2a - chr2:126718593	0.0232116	0.0394101	0.02763	0.0297683	0.0310723	0.0347475	0.0277759	0.0291272	0.0248405	0.030407	0.0376783	0.0184724	0.0197243	0.0299182	0.0162124	0.0196091	0.0339156	0.0197429	0.0150183	0.0255439	0.0266216	0.00803213
Lims1 - chr10:57886405	0.133333	0.214815	0.0512821	0.0416667	0.0833333	0.222222	0.108333	0.174747	0.138889	0.0793651	0.153555	0.104991	0.11981	0.191694	0.112347	0.0890097	0.104264	0.10644	0.0376939	0.0958623	0.142606	0.129952
Slc10a1 - chr12:82056543	0.00227743	0.00472503	0.00662709	0.00532012	0.00618281	0.00732806	0.00910389	0.00666812	0.00483487	0.00316577	0.00712004	0.00255102	0.00326497	0.00523312	0.00454239	0.00344738	0.00443769	0.0042378	0.00393908	0.0049969	0.00788796	0.00502296
Gm16253,Polr3gl - chr3:96382190	0.00257858	0.00454411	0.00507409	0.00459454	0.00616058	0.00575691	0.00628832	0.00495404	0.00595391	0.00345539	0.00598263	0.00383904	0.00334842	0.00809639	0.00252724	0.00455219	0.00670764	0.00490283	0.00214284	0.00472395	0.00618631	0.00439678
Zfp12,Zfp316 - chr5:144008333	0.0139395	0.0212838	0.0219958	0.017045	0.0245947	0.0242273	0.0244092	0.0257942	0.0253905	0.021012	0.0202815	0.0136849	0.0197442	0.023367	0.0177234	0.0156081	0.014861	0.0178276	0.0138496	0.0205962	0.0202816	0.0206533
Slfn5,Slfn5os - chr11:82776090	0.00574087	0.00576645	0.00644194	0.00565249	0.00569634	0.00694868	0.00676081	0.00587352	0.00699335	0.00552055	0.00853403	0.00372934	0.00787403	0.00647986	0.00408559	0.00496573	0.00373945	0.00400006	0.00427344	0.00632949	0.00598422	0.00601344
Dnase2a,Mast1 - chr8:87435096	0.020636	0.0256484	0.0249147	0.027945	0.0307532	0.0361692	0.0306929	0.0301637	0.0249782	0.0337154	0.037171	0.0147991	0.0373321	0.0295107	0.021369	0.0192298	0.0219922	0.0167953	0.0167653	0.024817	0.0397652	0.0284869
Rmi2 - chr16:10842080	0.0138146	0.0212163	0.0252924	0.016199	0.0221514	0.0217436	0.0252206	0.0314842	0.0258075	0.0351952	0.0247514	0.0244949	0.0309144	0.0310332	0.0354322	0.0164695	0.0193461	0.0190519	0.0130339	0.0166432	0.0302637	0.0176816
Rmi2 - chr16:10842084	0.0147767	0.0233132	0.0281051	0.0266946	0.0318436	0.0358846	0.035066	0.0303689	0.0349756	0.0328227	0.0287403	0.0279091	0.03754	0.0411339	0.0419295	0.0245162	0.0189569	0.0127604	0.0139569	0.0252342	0.0303948	0.0187572
Slfn5,Slfn5os - chr11:82776114	0.00831301	0.0110196	0.00910083	0.0123938	0.01012	0.0111942	0.011312	0.0129257	0.00916607	0.0109465	0.00971887	0.00840075	0.0123983	0.0118128	0.011022	0.0111352	0.00813576	0.0105932	0.00833515	0.00989139	0.00927998	0.00787829
AC152453.1,Gm16268,Nt5dc3,Stab2 - chr10:86299113	0.0331043	0.0512443	0.045656	0.0548747	0.0459303	0.0421658	0.049834	0.0580292	0.0505659	0.0514688	0.0599337	0.0285247	0.064938	0.0535711	0.0678257	0.054757	0.049754	0.0588048	0.0351157	0.0370808	0.0531768	0.0538383
Slfn5,Slfn5os - chr11:82776121	0.00592288	0.00830431	0.00725516	0.00958404	0.00755063	0.00684902	0.00860591	0.00906959	0.00821072	0.00808791	0.0080853	0.00496414	0.0100253	0.00959694	0.0086025	0.00867786	0.00684697	0.00505928	0.00573635	0.00616473	0.00697537	0.00857717
Ccdc189,Phkg2 - chr7:134722745	0.0466667	0.0947814	0.0844093	0.0934343	0.0694689	0.0514898	0.0894486	0.0707797	0.0980593	0.0847099	0.0770156	0.0357143	0.0839198	0.120652	0.0608607	0.0266667	0.0344828	0.115801	0.0742369	0.0837281	0.104857	0.0700483
-,Car5b - chrX:160416399	0.0153973	0.0192783	0.0169659	0.0193791	0.018286	0.0169108	0.024023	0.0220115	0.0273881	0.0181251	0.0203073	0.0102533	0.0141397	0.0238671	0.0186752	0.0114991	0.0171561	0.028832	0.0120411	0.0166258	0.020393	0.0231468
AC134329.1,Cdk4,Tspan31 - chr10:126504938	0.000848176	0.0049581	0.00653512	0.00558983	0.00888276	0.00296029	0.00724149	0.00517743	0.00433961	0.00525161	0.00751394	0.00525344	0.00388882	0.00719721	0.00333289	0.00311533	0.00220776	0.00660786	0.00457868	0.00439945	0.00545959	0.00632832
Gga2,Gm44987 - chr7:129131161	0.0143963	0.0282344	0.0307019	0.0239811	0.02293	0.0216583	0.0270241	0.0238896	0.0171732	0.0190201	0.0207887	0.0160057	0.0144167	0.027468	0.023688	0.0146682	0.0200335	0.0296264	0.0111591	0.0183203	0.0258605	0.0189942
Cbr2,Dcxr,Lrrc45,Rac3 - chr11:120586130	0.00551066	0.00507831	0.00813029	0.00652568	0.00686404	0.00763637	0.00781535	0.00722815	0.00740984	0.00581494	0.00766299	0.00487805	0.00966927	0.0110542	0.00890564	0.0090203	0.00220751	0.0107664	0.00835129	0.0109173	0.0115794	0.00617423
Trappc9 - chr15:72825148	0.0109931	0.021392	0.0193399	0.0209616	0.0179583	0.0202748	0.0199118	0.0232479	0.0161252	0.0202674	0.0209504	0.0135426	0.0198763	0.019317	0.0183835	0.0137047	0.0145313	0.0235552	0.015205	0.0221388	0.0232188	0.0226874
-,Gm11613 - chr11:97506876	0.00918606	0.0114392	0.0076317	0.00864295	0.0102412	0.0075712	0.00969728	0.00439123	0.0055549	0.0081913	0.00407973	0.003861	0.00886299	0.00416042	0.0113185	0.00617621	0.0081971	0.0108631	0.00478728	0.00442195	0.00400737	0.00558252
Slc38a6 - chr12:74412481	0.00882088	0.0122787	0.0216812	0.0132499	0.0210539	0.0149217	0.0321937	0.0121056	0.0113449	0.0155898	0.0158853	0.0113122	0.00621891	0.00818251	0.00847415	0.00997428	0.0122595	0.0111238	0.0142284	0.00983586	0.0148649	0.00780292
Gm37499,Stam - chr2:14069618	0.00436518	0.00723431	0.00624238	0.00760795	0.00566791	0.00676994	0.0109996	0.00658062	0.00614631	0.0091155	0.00632749	0.00241546	0.00401447	0.00335354	0.00767326	0.00780914	0.0141636	0.0118535	0.00838041	0.0017094	0.00398117	0.00234742
Gga2,Gm44987 - chr7:129131165	0.00464161	0.00845221	0.00570359	0.00529058	0.0085087	0.00480602	0.0116338	0.00586624	0.00533838	0.00487235	0.00597068	0.00309598	0.00472313	0.00357072	0.00492976	0.008247	0.0114715	0.0104466	0.00405602	0.00307955	0.00398362	0.005025
Surf6 - chr2:26743186	0.0117183	0.0104974	0.0122735	0.00950982	0.0137429	0.0145012	0.0127207	0.0130608	0.00865658	0.0112411	0.00646628	0.00915398	0.00716787	0.00719434	0.00798	0.0147402	0.0150062	0.0111111	0.0114603	0.0122169	0.0100011	0.00980355
Sco1 - chr11:66878169	0.00758409	0.00445043	0.00677918	0.0047107	0.00446527	0.00429774	0.00884842	0.00638744	0.00347079	0.00493625	0.00635835	0.00277008	0.00552685	0.00299924	0.00811925	0.00846251	0.00678443	0.00629952	0.00681081	0.00616336	0.00491183	0.00366146
Ripor2 - chr13:24824364	0.0057195	0.00759206	0.00993163	0.0081144	0.00672393	0.00708953	0.010568	0.0096395	0.00541356	0.00690852	0.00599222	0.00795902	0.00819895	0.00416265	0.00643853	0.0117228	0.00667497	0.00845649	0.00704241	0.00883493	0.00652784	0.00546932
AC152453.1,Gm16268,Nt5dc3,Stab2 - chr10:86299045	0.00449448	0.00744453	0.00650189	0.00897489	0.0106823	0.00752243	0.00991162	0.00727215	0.00870719	0.00946213	0.00864409	0.00647001	0.00949891	0.00554392	0.00984038	0.00956559	0.00605364	0.00933944	0.00951801	0.00809493	0.0127319	0.00897313
Smg5 - chr3:88156584	0.0081982	0.00823487	0.0102645	0.00999626	0.012853	0.00868623	0.0116403	0.00866074	0.0152225	0.013628	0.0102828	0.00492611	0.0133601	0.0152948	0.0122689	0.014166	0.0127289	0.00701981	0.00980068	0.00848402	0.0165922	0.012668
Cdk11b,Gm10563,Gm16023,Gm16024,Slc35e2 - chr4:154995596	0.0135042	0.0147138	0.0212346	0.0176794	0.0169218	0.0191116	0.0189674	0.0156746	0.0189634	0.0216222	0.0235919	0.00285714	0.0304953	0.0163629	0.016257	0.0171586	0.0193336	0.0125866	0.0211122	0.0192462	0.0220987	0.0154513
Ntan1,Pdxdc1 - chr16:13834100	0.0178081	0.0339487	0.0330908	0.0338119	0.0324056	0.0259464	0.0312844	0.0361844	0.0334213	0.0370289	0.036931	0.0169728	0.023188	0.0284436	0.0207354	0.0416213	0.0262737	0.0181463	0.0180126	0.0306719	0.0364737	0.027705
Grik1 - chr16:87945568	0.480769	0.563492	0.457071	0.741402	0.773077	0.680769	0.698485	0.664683	0.571795	0.592593	0.638258	0.5	0.666667	0.65	0.388889	0.833333	0.777778	0.5	0.410256	0.833333	0.722222	0.555556
N4bp2l2 - chr5:151440844	0.00622994	0.00795903	0.00385234	0.00606528	0.00830265	0.0110016	0.00725783	0.00795967	0.00812469	0.00662931	0.0115523	0.0033557	0.00574713	0.00347956	0.00562588	0.0114703	0.00924711	0.00427978	0.00266667	0.00823076	0.00932845	0.00535745
-,Noct - chr3:51030027	0.25	0.265242	0.434295	0.186819	0.289272	0.283249	0.116667	0.0830999	0.240605	0.201656	0.334174	0.2	0.229938	0.0952381	0.180556	0.244444	0.4	0.125	0.391667	0.15	0.222222	0.0666667
Rpa1 - chr11:75114502	0.0297619	0.0638528	0.100364	0.055782	0.0465095	0.00606061	0.0263119	0.035628	0.0620118	0.0350401	0.0285853	0.0590879	0.0379862	0.038749	0.0333671	0.0786172	0.0973967	0.0338948	0.0329308	0.0363555	0.0342757	0.0421397
Cdk11b,Gm10563,Gm16023,Gm16024,Slc35e2 - chr4:154995622	0.0196757	0.0493345	0.0589873	0.0407871	0.0492327	0.0408782	0.0497177	0.0459148	0.0463544	0.0390052	0.0525806	0.0515942	0.0478038	0.0471383	0.0373482	0.0748006	0.0555273	0.0493833	0.0441279	0.0584979	0.0319365	0.0535642
Rpa1 - chr11:75114080	0.151852	0.229303	0.340374	0.354157	0.193781	0.265185	0.239583	0.20621	0.234407	0.194056	0.323176	0.254853	0.235484	0.258254	0.224061	0.354863	0.361134	0.236086	0.208383	0.267629	0.227701	0.247962
Rpa1 - chr11:75114079	0.324934	0.535822	0.569043	0.594444	0.37145	0.448296	0.423835	0.364507	0.422963	0.38932	0.45614	0.543906	0.494209	0.485938	0.47901	0.677553	0.694778	0.457167	0.44341	0.49524	0.504621	0.489633
Rpa1 - chr11:75114517	0.450855	0.642377	0.762403	0.618519	0.521745	0.577922	0.55957	0.537968	0.61457	0.569673	0.646192	0.701744	0.689023	0.655209	0.648447	0.789147	0.807629	0.639765	0.655374	0.670572	0.611735	0.617171
Rgs9 - chr11:109118729	0.0578317	0.0911333	0.0871732	0.0717243	0.0917639	0.0844073	0.0830451	0.0821202	0.0881212	0.0977692	0.106889	0.136538	0.0891645	0.0813199	0.0909522	0.146718	0.0780002	0.109954	0.100497	0.0687793	0.146847	0.0815972
Klhl7,Nupl2 - chr5:23666943	0.000960615	0.0292659	0.0196555	0.0156792	0.0199268	0.019474	0.0218734	0.015312	0.0191682	0.0163967	0.0224636	0.0208683	0.0209677	0.0258291	0.0176061	0.022878	0.0105339	0.0242053	0.0250277	0.0234827	0.0412983	0.0173398
Gm12953,Tmem69 - chr4:116224850	0.00546066	0.00938966	0.00816061	0.00547996	0.00692538	0.00810447	0.0051875	0.00873365	0.00850491	0.00491887	0.00893107	0.00696184	0.00788499	0.00946513	0.00805004	0.00942609	0.00732977	0.0090936	0.0113341	0.00863701	0.0131332	0.00812749
Glrx2,Trove2 - chr1:145596692	0.00820858	0.0131194	0.0124082	0.0118401	0.0103014	0.0131875	0.0114098	0.010416	0.0123435	0.00886183	0.00807118	0.012626	0.00814466	0.0068583	0.0098424	0.0162483	0.0166183	0.0190273	0.00988796	0.00936429	0.0184341	0.0121327
Zfp950 - chr19:61202003	0.0306373	0.0445646	0.0472762	0.0374787	0.0219804	0.0348854	0.0221546	0.022525	0.0379389	0.0254319	0.0320904	0.0283242	0.0122582	0.0164835	0.0318586	0.0431373	0.0296037	0.0381944	0.0261398	0.0216365	0.0406071	0.0238095
Rtn2 - chr7:19874499	0.00221018	0.00330849	0.00787081	0.00419997	0.00695967	0.00672809	0.00503299	0.00660128	0.00326243	0.00530906	0.00458402	0.0105263	0.00616199	0.0026455	0.00548943	0.00505993	0.00716531	0.00451865	0.008712	0.00290784	0.00715107	0.00866266
Gm14018,Mfap1a - chr2:121318605	0.0129	0.0222852	0.0243902	0.0261649	0.0235486	0.0239681	0.0298804	0.017391	0.0185521	0.0279618	0.0266101	0.0336851	0.0194798	0.00941558	0.0201446	0.0188623	0.0427502	0.0130417	0.019618	0.0197588	0.0269308	0.0291763
A930015D03Rik,H2-T24 - chr17:36143430	0.00204661	0.00577459	0.00452737	0.00359895	0.00301432	0.00413528	0.00446646	0.00284677	0.00406376	0.00441014	0.00385077	0.00663939	0.00546983	0.0018679	0.00376873	0.000706215	0.00148148	0.000643501	0.0034585	0.00241768	0.00429829	0.00190163
Sacm1l,Slc6a20b - chr9:123503844	0.0138881	0.0194038	0.00585806	0.0110572	0.0243482	0.0272931	0.0150428	0.00725368	0.0151632	0.0212723	0.016861	0.0285039	0.0210694	0.00160256	0.0147985	0.00258398	0.0106183	0.00952381	0.0112593	0.0141569	0.0227627	0.00748223
Sec24a - chr11:51524932	0.0145248	0.00996593	0.0119136	0.0154077	0.0180343	0.0164344	0.0169213	0.0065211	0.00378193	0.0067104	0.00918938	0.0243867	0.0198525	0.00520833	0.0151269	0.0113636	0.0101103	0.0128605	0.0186853	0.0130096	0.0273757	0.00326797
-,Rmi2 - chr16:10842105	0.00347701	0.00938524	0.0166867	0.0124068	0.0148501	0.0154589	0.0103939	0.00716384	0.0121793	0.0110556	0.00682098	0.0298542	0.0167111	0.00719763	0.014349	0.00668373	0.0129754	0.00937797	0.0130975	0.021409	0.0147303	0.0141835
Smg5 - chr3:88156567	0.00990545	0.0175828	0.0132369	0.013937	0.0145157	0.0156832	0.0141386	0.0159014	0.0129959	0.0125896	0.0131742	0.0296363	0.0194407	0.0136621	0.0244955	0.0122029	0.00750318	0.0111494	0.0188221	0.0173894	0.015175	0.00868709
Mau2 - chr8:72541211	0.00211949	0.00539836	0.00746704	0.00619615	0.0027484	0.00587155	0.0082789	0.00676845	0.00405881	0.00415312	0.00540451	0.00734448	0.00183671	0.0043005	0.0104354	0.000960615	0.000863558	0.00471054	0.00480769	0.00565712	0.00215493	0.00452603
Rsg1 - chr4:140781926	0.00529101	0.0201802	0.0358562	0.0284043	0.0143875	0.0499241	0.0219456	0.0353855	0.0234565	0.0154971	0.0105263	0.0222222	0.0070922	0.0212121	0.0437908	0.0197531	0.015873	0.0185185	0.0195231	0.00584795	0.0265301	0.0274943
Ntan1,Pdxdc1 - chr16:13834111	0.00512906	0.00924069	0.0121501	0.00991618	0.00866148	0.00920075	0.00849996	0.00596265	0.00559948	0.00984689	0.00709314	0.00862069	0.00430881	0.0106133	0.0155256	0.00751651	0.00451781	0.00816457	0.0047619	0.00652128	0.00941168	0.00764142
Icam1 - chr9:20823950	0.00174599	0.00202726	0.00137741	0.00467281	0.00403287	0.00321704	0.00120793	0.00411358	0.00301935	0.00338868	0.00332964	0.00221239	0.00111111	0.00129702	0.00432917	0.00275482	0.00149477	0.00275482	0.00230681	0.00118624	0.00346408	0.00122549
Gnl3l - chrX:147419093	0.00518474	0.00962609	0.0121616	0.00936156	0.00756315	0.00999978	0.00741043	0.0216366	0.0100903	0.00857581	0.0139829	0.00274725	0.00117786	0.00281294	0.0166036	0.0101217	0.00784832	0.0111051	0.00665312	0.00933076	0.0125951	0.00394602
Agl - chr3:116447014	0.0113951	0.0145254	0.0143812	0.0156823	0.0182616	0.0169653	0.0158931	0.0181666	0.0125194	0.0146059	0.0271914	0.0107615	0.00937344	0.0151865	0.0169717	0.0146119	0.00699913	0.0115805	0.0122161	0.0113137	0.0127306	0.0137411
Zfp951 - chr5:105243957	0.0351852	0.0151515	0.0429012	0.0278261	0.0623292	0.0277778	0.0426487	0.0365961	0.0563109	0.0138889	0.0679012	0.0169492	0.030316	0.0384921	0.0189198	0.0290179	0.00617284	0.0228261	0.0348093	0.0182025	0.0261438	0.015625
Mir3062,Pfas - chr11:68800393	0.00773335	0.00699522	0.0119431	0.0127896	0.0111213	0.0132676	0.00929468	0.0105437	0.0101529	0.00943029	0.0119296	0.010113	0.00786143	0.00898861	0.00790094	0.00906793	0.00700508	0.00561705	0.00623583	0.00879146	0.00529331	0.00564115
Gnl3l - chrX:147419095	0.0114591	0.00939211	0.0219013	0.0133636	0.0142721	0.0131126	0.00797424	0.0177056	0.00991925	0.00768113	0.0152172	0.0209771	0.00116144	0.00296296	0.00639552	0.0133594	0.0021645	0.00931639	0.00375019	0.0116402	0.00485437	0.0040404
Dnase2a,Mast1 - chr8:87435062	0.00952381	0.024184	0.0218104	0.0339365	0.0205161	0.0190289	0.0279537	0.0387951	0.0420211	0.0609676	0.0293265	0.0210893	0.0115366	0.0103664	0.024811	0.0336649	0.0153439	0.0343137	0.0363054	0.043899	0.0188679	0.0130719
-,Rsrc2 - chr5:124192075	0.00154975	0.00292111	0.0020882	0.0045813	0.000945646	0.00235979	0.00309297	0.00266105	0.00366887	0.00417806	0.00310698	0.00353869	0.0013471	0.00212214	0.00185507	0.00114351	0.00142653	0.00152555	0.00341307	0.00305199	0.0011841	0.000548246
Pcsk2 - chr2:143401286	0.0149767	0.0381316	0.0620707	0.0648523	0.0821125	0.0584618	0.0550633	0.0858551	0.100824	0.0693514	0.0438609	0.0738381	0.0324147	0.0247967	0.0342047	0.0295075	0.0244925	0.0448347	0.0806029	0.0469031	0.0484817	0.0407429
Kdm6b,Kdm6bos - chr11:69216793	0.111909	0.0973312	0.148294	0.265113	0.173611	0.151042	0.200075	0.233752	0.288436	0.185496	0.144863	0.20098	0.10747	0.0896686	0.141865	0.137037	0.145425	0.094246	0.177795	0.163973	0.123397	0.1443
Stard7 - chr2:127110778	0.0102109	0.0516298	0.0567379	0.058748	0.0226806	0.052816	0.0542043	0.0442508	0.0938266	0.0564286	0.0460705	0.0511509	0.0247631	0.0433027	0.0522162	0.0387093	0.0309455	0.0307407	0.0289634	0.0411808	0.0189372	0.0340771
AC166323.1,Ppp2r3c - chr12:56383916	0.133333	0.269841	0.355556	0.318182	0.430556	0.239316	0.471429	0.138889	0.694444	0.344322	0.366667	0.344697	0.278384	0.133547	0.171066	0.101916	0.209216	0.158018	0.227961	0.227273	0.225577	0.232271
Cers5 - chr15:99575157	0.333333	0.0578704	0.378788	0.67803	0.166667	0.693061	0.0289855	0.638889	0.606061	0.166667	0.234722	0.363636	0.0992063	0.333333	0.115616	0.288889	0.2	0.166667	0.566667	0.222222	0.025641	0.407407
-,Fnip2,Gm17359 - chr3:79260379	0.00552116	0.0108413	0.0151634	0.0147969	0.0108795	0.0162364	0.0149089	0.0067124	0.0109241	0.00587958	0.0137295	0.0166286	0.00677264	0.00321332	0.0166065	0.00464661	0.00805667	0.00629414	0.00258398	0.0063857	0.00228311	0.0105096
Gm43597,Gm43598,N4bp2l2 - chr5:151405933	0.00551876	0.00533109	0.00589185	0.00729665	0.00786982	0.0115139	0.0101854	0.00944337	0.0114668	0.00219289	0.00437984	0.00520833	0.0075678	0.00205761	0.00852722	0.00595409	0.0042735	0.00199601	0.00311526	0.00797068	0.00246914	0.0042735
Bbs1,Gm25334 - chr19:4901496	0.0105288	0.00871123	0.011018	0.0062871	0.00161812	0.00343643	0.013947	0.00997054	0.00962133	0.0129543	0.00557819	0.00704225	0.00512821	0.00749064	0.00993464	0.00866234	0.00347222	0.00358423	0.00520833	0.0072543	0.00266667	0.00411523
Gm17808,Rad51ap1 - chr6:126879673	0.0308852	0.0306855	0.0246168	0.0272841	0.0247748	0.0276305	0.0287751	0.0286488	0.0418001	0.0274335	0.0370319	0.0649371	0.0261493	0.026926	0.0251732	0.0554842	0.0206176	0.0138999	0.0300131	0.0142713	0.00297619	0.0045045
Kcnq1,Kcnq1ot1 - chr7:150403081	0.403922	0.238749	0.297076	0.270893	0.187406	0.164103	0.314863	0.253019	0.138928	0.245195	0.438492	0.333333	0.0555556	0.0929487	0.259259	0.477778	0.194444	0.133333	0.25	0.144444	0.185606	0.163889
AC152453.1,Gm16268,Nt5dc3,Stab2 - chr10:86299099	0.00264068	0.00402588	0.0040874	0.00402945	0.00341112	0.00426095	0.00446559	0.00623143	0.00486787	0.0028839	0.00470568	0.0071026	0.00240999	0.00681657	0.00393969	0.00490296	0.00383711	0.00215054	0.00274178	0.00129199	0.00595214	0.00132275
Neb - chr2:51999512	0.666667	0.833333	0.822222	0.645833	0.111111	0.759259	0.888889	1	0.650794	0.111111	0.533333	0.5	0.333333	0.555556	0.666667	0.666667	1	0.333333	0.666667	0.380952	0.666667	0.333333
Abi2,Raph1 - chr1:60535434	0.00648835	0.00765849	0.00851383	0.00675196	0.00428431	0.00781468	0.00838233	0.00894984	0.00805794	0.00787236	0.00692442	0.00680603	0.00750704	0.0118559	0.0110661	0.00805098	0.00364299	0.0137686	0.00883002	0.00976185	0.0114874	0.0100549
Med18 - chr4:132014891	0.00663748	0.00644019	0.00887727	0.00707034	0.00542262	0.00721399	0.00781604	0.0101675	0.00654206	0.00618071	0.0077704	0.00713799	0.00630954	0.0129012	0.0117082	0.00833921	0.004884	0.0136767	0.00639914	0.0099823	0.0112958	0.00607021
-,Tcerg1 - chr18:42717480	0.0975876	0.152009	0.124743	0.123296	0.139017	0.134755	0.0830273	0.15109	0.118393	0.174617	0.106838	0.0894118	0.0909404	0.19076	0.136266	0.125	0.105207	0.163835	0.172532	0.182386	0.128362	0.137193
Zfp950 - chr19:61202005	0.013516	0.0287507	0.0164953	0.0550948	0.0361789	0.0245224	0.0139446	0.0388369	0.0179633	0.029839	0.0358393	0.0283242	0.00584795	0.0460007	0.0417569	0.0218639	0.0496073	0.0574248	0.0441292	0.067967	0.0249094	0.0460317
Trub1 - chr19:57559853	0.0900933	0.140629	0.130919	0.144932	0.162024	0.17457	0.148905	0.17369	0.178483	0.180397	0.180664	0.254795	0.125775	0.176398	0.121799	0.128999	0.117231	0.12037	0.122859	0.153066	0.181819	0.174206
Slc22a15 - chr3:101725669	0.0327211	0.057305	0.0566194	0.0550534	0.0649423	0.0734551	0.131248	0.0480262	0.0572969	0.109876	0.0932958	0.197619	0.0927013	0.0593434	0.0694617	0.0548387	0.0133333	0.111111	0.0772947	0.0703704	0.102418	0.0485348
AC134329.1,Cdk4,Tspan31 - chr10:126504936	0.0039032	0.00489469	0.00413598	0.00397008	0.00535546	0.00356914	0.00508634	0.00640872	0.00685864	0.00668632	0.00506914	0.0102816	0.00793928	0.00860259	0.00449917	0.00439551	0.000910747	0.00743261	0.00347941	0.00495567	0.00538228	0.00215054
Kcnk6 - chr7:30007870	0.00546663	0.00842226	0.00985082	0.00986478	0.00566098	0.00803059	0.00881504	0.00944032	0.00696337	0.0087309	0.00557977	0.0166378	0.00748302	0.0110801	0.00361195	0.00138313	0.00218579	0.0104389	0.00882516	0.00796857	0.00337471	0.00620458
Mmachc,Prdx1 - chr4:116375625	0.0025641	0.00352162	0.0115873	0.00824631	0.0119236	0.0092303	0.00716927	0.00722664	0.01574	0.0154407	0.00560356	0.013798	0.00494858	0.0123747	0.0052356	0.00200803	0.00177305	0.0114769	0.00283688	0.00810647	0.00453704	0.0120488
Sco1 - chr11:66878140	0.00177928	0.0041629	0.00912134	0.00792979	0.0143578	0.00794046	0.00692122	0.0060937	0.00826253	0.00525275	0.00655905	0.00871939	0.0033379	0.00419391	0.00790974	0.00823458	0.00315352	0.00597715	0.00393782	0.00817755	0.00564167	0.00839329
-,Gm11613 - chr11:97506916	0.00769231	0.0136967	0.0183157	0.0169396	0.0290794	0.0138606	0.0062627	0.00215054	0.0141741	0.0105375	0.0182397	0.0405844	0.0143408	0.0330484	0.0087963	0.0204082	0.00775194	0.0151515	0.0114943	0.0130446	0.0169042	0.0297697
Gm37499,Stam - chr2:14069614	0.0431894	0.0740882	0.0858638	0.100105	0.089904	0.0491465	0.0378648	0.0535018	0.0617958	0.0860795	0.0738265	0.0687802	0.0780781	0.0765526	0.068445	0.055115	0.060513	0.0566338	0.0711789	0.0609265	0.0662178	0.0752888
2310039H08Rik,Gm26904,Rpl7l1 - chr17:46911879	0.014354	0.0248382	0.0220558	0.032645	0.0283255	0.015396	0.0186781	0.026076	0.0227095	0.0249839	0.0304105	0.0305833	0.0252553	0.0274986	0.0279737	0.0226626	0.0155422	0.0174206	0.0149968	0.0169996	0.026051	0.0182305
4933434E20Rik,Gm16540 - chr3:89864630	0.0184499	0.0229417	0.0240643	0.020353	0.0377371	0.00501253	0.0245098	0.0311902	0.0168005	0.0225466	0.0355703	0.0454545	0.0157715	0.0414938	0.0418197	0.00716846	0.0184383	0.020757	0.0247549	0.00997426	0.0347407	0.0382084
-,Rps19-ps3,Zfp933 - chr4:147199108	0.0475	0.0826673	0.14429	0.130889	0.106662	0.111256	0.141863	0.103282	0.0493902	0.160725	0.111908	0.176923	0.0611111	0.151282	0.13373	0.0555556	0.0416667	0.0555556	0.114025	0.0651515	0.0592885	0.193651
A930015D03Rik,H2-T24 - chr17:36143416	0.00483654	0.00521064	0.00581673	0.00141595	0.00798569	0.00292395	0.00736764	0.00425507	0.00769746	0.0026229	0.00322376	0.00604839	0.0037984	0.0038891	0.00469468	0.00524808	0.00125786	0.00818473	0.00545103	0.00800537	0.000992063	0.00217236
-,Brf1 - chr12:114196400	0.194444	0.206349	0.178571	0.166667	0.466667	0.111111	0.190476	0.277778	0.133333	0.0555556	0.455952	0.325	0.283333	0.333333	0.125	0.335185	0.273737	0.337302	0.373016	0.293651	0.166667	0.45
Rmi2 - chr16:10842055	0.0150819	0.0103815	0.0172775	0.0123002	0.0196844	0.0157351	0.0221172	0.0235167	0.0222433	0.0182651	0.0156999	0.026473	0.0123994	0.0273541	0.0224897	0.0202658	0.0169677	0.0135184	0.0169143	0.0218843	0.00980392	0.0273737
Slfn5,Slfn5os - chr11:82776158	0.00395928	0.00275019	0.002247	0.00323179	0.00327976	0.00407047	0.00387952	0.0038521	0.00265391	0.00145789	0.00289303	0.00626041	0.001386	0.00445675	0.000704722	0.0022779	0.00400053	0.0018622	0.00059312	0.00300464	0.000852515	0.00323792
Sugp1 - chr8:72590958	0.555556	0.194444	0.75	0.722222	0.388889	0.52381	0.833333	0.833333	0.611111	0.383333	0.383333	1	0.75	0.472222	0.288889	0.388889	0.6	0.444444	0.65	0.688889	0.333333	0.722222
Mdc1,Nrm,Ppp1r18os - chr17:35995831	0.00796309	0.011945	0.00669415	0.00653821	0.0088888	0.00933735	0.0103658	0.0114035	0.0115124	0.0111399	0.00899113	0.00976683	0.0109906	0.00717956	0.00849846	0.0104987	0.0112466	0.0127706	0.0147415	0.00473362	0.00710786	0.0162582
Nkiras1,Ube2e1 - chr14:19114856	0.00759512	0.0127326	0.0134868	0.0110875	0.0102097	0.0113419	0.010642	0.0108808	0.0148186	0.0149821	0.0118826	0.0100355	0.0209893	0.01518	0.0181305	0.013655	0.0121228	0.0134087	0.0124143	0.00647741	0.0109924	0.0166779
Fam160b2,Nudt18 - chr14:70983561	0.167582	0.293684	0.340502	0.304212	0.30376	0.252645	0.300936	0.257947	0.265343	0.317978	0.318745	0.272222	0.362734	0.326768	0.431746	0.418981	0.298306	0.333868	0.388091	0.227273	0.280449	0.458333
4933434E20Rik,Gm16540 - chr3:89864635	0.0115942	0.0261894	0.0191585	0.0184706	0.0178281	0.00909035	0.0224191	0.0274228	0.0168183	0.0172915	0.0228655	0.00704225	0.0107554	0.00617284	0.0261113	0.02146	0.0137566	0.0238377	0.00847953	0.014283	0.0101987	0.0313725
Gm10490,Gm10491,Timm17b - chrX:7484249	0.0169082	0.0102311	0.0124355	0.010737	0.0114178	0.00896629	0.0160824	0.0121972	0.0109906	0.0152551	0.0132385	0.00617284	0.0105313	0.0135946	0.0127531	0.0257486	0.00779137	0.0135484	0.00376648	0.0120141	0.0151315	0.0237472
Lpl - chr8:71429193	0.166084	0.121902	0.133499	0.138277	0.125397	0.146551	0.151515	0.187386	0.141826	0.163029	0.151753	0.111111	0.142857	0.119841	0.149892	0.215488	0.142063	0.163636	0.116162	0.0626781	0.181373	0.155556
Lpl - chr8:71429212	0.162088	0.0900107	0.129542	0.119673	0.0993281	0.10937	0.141397	0.163526	0.137501	0.132468	0.154677	0.111111	0.11329	0.110119	0.105556	0.236111	0.154167	0.111111	0.108225	0.0537037	0.175961	0.173993
Gm12953,Tmem69 - chr4:116224888	0.00962832	0.0153883	0.0178615	0.0216617	0.0192729	0.0199715	0.0122736	0.0102454	0.0216836	0.0139453	0.0204663	0.0128036	0.0250394	0.0214748	0.0252322	0.019083	0.0171582	0.0142469	0.0163711	0.0225135	0.0168454	0.0219003
AC152453.1,Gm16268,Nt5dc3,Stab2 - chr10:86299103	0.0321632	0.0473716	0.049934	0.0484133	0.0445794	0.0500627	0.0436549	0.0508773	0.0542738	0.0468431	0.0523048	0.0366658	0.0500087	0.0516237	0.0615682	0.0465244	0.0549992	0.047212	0.0508588	0.0469436	0.0363582	0.056999
Setx - chr2:28986563	0.149416	0.208619	0.227522	0.245767	0.203332	0.219248	0.196262	0.203936	0.227562	0.196024	0.201252	0.20625	0.268029	0.266816	0.253416	0.252351	0.270971	0.231812	0.217501	0.21615	0.175666	0.273939
Gm37988,Lypla1 - chr1:4831604	0.0103455	0.00952474	0.0117021	0.0118105	0.0128903	0.0143352	0.0123965	0.0157976	0.0122911	0.0119129	0.0113076	0.00783255	0.0138513	0.0140179	0.0124387	0.0099808	0.0107987	0.00969402	0.0141451	0.014791	0.0102943	0.0124904
Slfn5,Slfn5os - chr11:82776119	0.0102256	0.0130356	0.0127695	0.0134827	0.0108285	0.0122144	0.0126897	0.0138603	0.0137343	0.0130185	0.0140249	0.0107612	0.013894	0.0124573	0.0136449	0.0136681	0.0121558	0.0093643	0.0140009	0.0144715	0.00933379	0.0149371
Dnase2a,Mast1 - chr8:87435108	0.0139511	0.0187907	0.0173543	0.0168326	0.0190877	0.0186771	0.0233496	0.0175274	0.015134	0.0145689	0.0155895	0.0131871	0.024205	0.0230986	0.017967	0.0238382	0.0187013	0.0149605	0.0164862	0.0215274	0.00880928	0.017662
Bora,Mzt1 - chr14:99448513	0.0666667	0.226852	0.151852	0.189542	0.294444	0.134105	0.267373	0.238889	0.201852	0.233766	0.1294	0.5	0.466667	0.19246	0.497354	0.3	0.322222	0.333333	0.273148	0.472222	0.484127	0.416667
Commd7 - chr2:153444087	0.0573574	0.0596154	0.0357384	0.0421687	0.0559934	0.0587568	0.044709	0.0636411	0.0526407	0.027345	0.0409753	0.086848	0.103924	0.0637988	0.0754768	0.0848227	0.0649806	0.0771767	0.0799613	0.081371	0.0839394	0.0620764
Slc22a15 - chr3:101725672	0.0194721	0.0975355	0.102545	0.0392465	0.0394981	0.0572404	0.0336826	0.0552288	0.0658857	0.0503552	0.0383551	0.0851449	0.116307	0.0643723	0.0917949	0.105834	0.0895749	0.0787037	0.10404	0.127923	0.0698006	0.0579365
4930532G15Rik,Bpnt1 - chr1:187181075	0.00434684	0.0101921	0.0103547	0.0067663	0.00710251	0.00741279	0.00751329	0.00888686	0.00810013	0.00929764	0.00706644	0.00798083	0.0109877	0.0111697	0.0105818	0.0106165	0.0100076	0.0112276	0.00973442	0.0125194	0.0103457	0.0101705
Ccdc189,Phkg2 - chr7:134722682	0.00709742	0.0162445	0.0150932	0.0144778	0.0147308	0.0139036	0.0179156	0.0127507	0.0173519	0.0176849	0.0128792	0.0177063	0.0199902	0.0188741	0.0253081	0.0212985	0.0226919	0.0176629	0.0254313	0.0213062	0.0220731	0.0190974
-,Pds5a - chr5:66088180	0.340476	0.374554	0.495116	0.441168	0.476077	0.334153	0.296215	0.354604	0.365786	0.357375	0.298039	0.971259	0.946102	0.883538	0.907665	0.967998	0.952837	0.936837	0.919775	0.934199	0.965635	0.908642
Gclm,Gm17494,Gm6061 - chr3:121962255	0.277778	0.35	0.229437	0.155556	0.592857	0.388889	0.432479	0.198413	0.4	0.455556	0.477778	0.861538	1	0.906061	0.88547	0.931548	0.815058	0.969697	0.884259	0.706816	0.830556	0.889855
Usp25 - chr16:77093989	0.277778	0.546032	0.384016	0.277778	0.289683	0.327778	0.558923	0.470034	0.52381	0.5	0.579762	0.950595	0.943441	0.899473	0.932024	0.933062	0.930415	0.937322	0.903331	0.947691	0.897724	0.898479
Arel1,Fcf1 - chr12:86313369	0.0666667	0.105489	0.122222	0.219336	0.047619	0.150794	0.0977564	0.166667	0.0846154	0.203704	0.030303	0.309524	0.206349	0.358333	0.262626	0.345238	0.241667	0.288889	0.392857	0.357143	0.361905	0.194444
Mdc1,Nrm,Ppp1r18os - chr17:35995867	0.00875304	0.0134584	0.0110779	0.0147349	0.0139516	0.0122695	0.0157628	0.0154053	0.0136323	0.0112748	0.016194	0.0213488	0.0193148	0.0226752	0.0244311	0.0252909	0.0184017	0.0190177	0.0223744	0.0244566	0.0233689	0.0199647
Agl - chr3:116447046	0.0270455	0.0394805	0.0586949	0.052875	0.0372886	0.0471649	0.0336737	0.0451483	0.037279	0.0477257	0.0461055	0.0664221	0.0560556	0.0758548	0.0706251	0.0554138	0.0468571	0.0614311	0.0496991	0.0583282	0.0721279	0.0744354
Xrcc1 - chr7:25355613	0.444444	0.380952	0.722222	0.50887	0.591631	0.596032	0.577778	0.611111	0.434343	0.539683	0.523148	0.85	0.835097	0.857794	0.845264	0.84623	0.913098	0.873965	0.86489	0.786698	0.852513	0.921276
Cog3 - chr14:76119526	0.254079	0.32265	0.546032	0.309524	0.43663	0.462963	0.388889	0.423461	0.377778	0.406371	0.475	0.619444	0.588095	0.597389	0.504401	0.52085	0.553472	0.511813	0.640079	0.502442	0.524123	0.552669
Gm20470,Katna1 - chr10:7463584	0.190476	0.121693	0.257576	0.555556	0.162037	0.233333	0.125	0.1	0.285714	0.422222	0.244444	0.9	0.688889	0.952381	0.726984	0.696429	0.875	0.68254	0.533333	0.722222	0.683333	0.809259
Gm43062,Nras - chr3:102870648	0.0115311	0.0185613	0.0101856	0.0114807	0.0101287	0.0129617	0.0122739	0.013855	0.0134698	0.0162023	0.0115912	0.0274913	0.0262257	0.0267461	0.0257662	0.026272	0.0275836	0.0248226	0.0171335	0.0256781	0.0263801	0.0210662
Dcdc2b,Tmem234 - chr4:129285007	0.013918	0.0201333	0.0118942	0.0144099	0.0108799	0.016182	0.0126196	0.0149641	0.014333	0.0162018	0.0149443	0.0307339	0.0326099	0.0323344	0.0323016	0.0345631	0.0370176	0.0263923	0.0259602	0.0390859	0.0327075	0.0397324
-,AY036118,CT010467.1,Gm26917,Gm42418 - chr17:39984527	0.00188051	0.00221706	0.00236992	0.00270182	0.00245137	0.00236481	0.00240597	0.00231506	0.00225439	0.00260413	0.00261563	0.0106972	0.0135082	0.0146189	0.0100437	0.0109838	0.0127724	0.00936468	0.0132338	0.0130825	0.00805132	0.00769068
Ddx56 - chr11:6160898	0.0767544	0.0998994	0.0589372	0.0563158	0.133333	0.0533333	0.0423188	0.0466667	0.0684524	0.0681992	0.0441919	0.157201	0.172343	0.178566	0.15311	0.133747	0.165741	0.0957265	0.106798	0.123963	0.124638	0.127896
Cd52,Crybg2 - chr4:133645742	0.0168858	0.0294069	0.0279818	0.0278801	0.0328256	0.0210968	0.0264885	0.0225808	0.028974	0.0323994	0.0252438	0.0431547	0.0579626	0.0576413	0.0599298	0.0325623	0.0518776	0.0535876	0.0526919	0.0413858	0.0455931	0.0550064
Smg5 - chr3:88156113	0.052549	0.0573871	0.0612745	0.0830895	0.0999025	0.150689	0.0660173	0.0992063	0.0694861	0.116823	0.105681	0.204955	0.148883	0.160185	0.156774	0.179815	0.165455	0.146819	0.094697	0.132025	0.138471	0.0737374
-,Ube2g1 - chr11:72493091	0.0846561	0.080719	0.0538095	0.0512821	0.0997151	0.103662	0.116758	0.0541126	0.0277778	0.0612745	0.0800926	0.25	0.238095	0.261111	0.214286	0.361111	0.320635	0.15	0.166667	0.0833333	0.244444	0.291667
-,D5Ertd579e - chr5:37052028	0.216117	0.340278	0.198864	0.22098	0.405449	0.328129	0.261905	0.470679	0.288084	0.236643	0.384454	0.464286	0.5	0.575926	0.563095	0.539474	0.500754	0.258333	0.529101	0.416667	0.716667	0.555556
Gm12953,Tmem69 - chr4:116224840	0.00202822	0.00441386	0.00485181	0.00446473	0.00547671	0.001443	0.00254913	0.00183315	0.00522359	0.00158353	0.0023411	0.01019	0.00698633	0.00805189	0.0124612	0.00871568	0.00682437	0.00557135	0.0100344	0.00788338	0.00649479	0.00530829
Pan2 - chr10:127742238	0.0078942	0.0143525	0.0120589	0.0156586	0.0113382	0.012412	0.0138921	0.0161336	0.0110232	0.00972194	0.0147704	0.0268471	0.02638	0.025096	0.0338907	0.031169	0.0252664	0.0198876	0.0285021	0.0302734	0.037659	0.022439
Kcnk6 - chr7:30007838	0.00706358	0.0116914	0.0123327	0.0138561	0.00988519	0.00765576	0.00871402	0.0114314	0.00932426	0.00715898	0.0147067	0.0302151	0.0252592	0.0260857	0.038213	0.0244499	0.0266201	0.025799	0.0235666	0.0263319	0.0310918	0.0219228
-,Gm24148,Mir3535,Ncl,Snora75 - chr1:88246680	0.0045045	0.0135566	0.00593358	0.0137676	0.00438596	0.00845447	0.00744151	0.00514779	0.00879873	0.00362319	0.00396952	0.0342016	0.0269582	0.0113143	0.0283507	0.0454512	0.0416357	0.0200778	0.0254326	0.0495472	0.0364637	0.029137
Elavl1 - chr8:4292228	0.0277778	0.106156	0.0311021	0.0719697	0.0488889	0.0515873	0.0809263	0.0870682	0.030303	0.115079	0.0539337	0.183333	0.166667	0.140741	0.134803	0.122222	0.19246	0.0222222	0.12037	0.225541	0.116162	0.117989
Huwe1 - chrX:148304092	0.111111	0.288889	0.266504	0.211267	0.35	0.174603	0.373366	0.185264	0.21011	0.107212	0.3591	0.333333	0.222222	0.396825	0.527778	0.333333	0.622222	0.477778	0.277778	0.507769	0.333333	0.277778
Acad9,Gm43079,Gm43205 - chr3:35991360	0.0809051	0.124875	0.121474	0.138291	0.156067	0.145487	0.136485	0.12799	0.130524	0.113079	0.138363	0.0724187	0.143105	0.176525	0.215793	0.129341	0.233282	0.131937	0.140411	0.155439	0.253135	0.169419
Cdca2 - chr14:68312515	0.166667	0.416472	0.306777	0.434524	0.388278	0.361111	0.515152	0.333333	0.227273	0.336508	0.305556	0.166667	0.616667	0.444444	0.805556	0.518519	0.583333	0.25	0.388889	0.444444	0.490476	0.625
Pde5a - chr3:122559199	0.0411594	0.10787	0.0672101	0.136882	0.0753481	0.115935	0.183461	0.0564571	0.129653	0.131396	0.13549	0.25	0.2	0.0238095	0.217251	0.0747475	0.205735	0.0925926	0.107407	0.259921	0.0944444	0.198039
Gm26910,Seh1l - chr18:67936866	0.0846561	0.0525794	0.0640182	0.0277778	0.106692	0.0909091	0.0166667	0.0333333	0.0589744	0.0942982	0.0578002	0.366667	0.125	0.163636	0.22619	0.0416667	0.379365	0.125	0.208333	0.175	0.0555556	0.241582
-,Mrps15,Oscp1 - chr4:125734533	0.111111	0.166667	0.277778	0.333333	0.111111	0.111111	0.166667	0.130952	0.216667	0.416667	0.037037	0.75	0.222222	0.222222	0.583333	0.4	0.388889	0.333333	0.677778	0.333333	0.166667	0.388889
Tbce - chr13:14103153	0.2	0.0238095	0.047619	0.193939	0.0811966	0.104149	0.0464744	0.265608	0.037037	0.194872	0.0444444	0.442857	0.3	0.294872	0.412698	0.254545	0.277778	0.222222	0.142857	0.361905	0.111111	0.35
Mad2l1 - chr6:66490645	0.0254804	0.00584795	0.0272904	0.0183003	0.0111111	0.0324433	0.0274194	0.0302003	0.0264199	0.038235	0.0352381	0.047943	0.0401249	0.0506147	0.0663272	0.0372615	0.0406311	0.0425804	0.049157	0.0447903	0.0308456	0.0501263
Agfg1 - chr1:82845880	0.187364	0.109428	0.312865	0.279365	0.341709	0.361111	0.344508	0.18954	0.301242	0.135088	0.310101	0.75	0.304762	0.777778	0.84127	0.35	0.416667	0.583333	0.444444	0.672222	0.540404	0.777778
-,Rbpj - chr5:53992115	0.0250095	0.0378718	0.0346232	0.039944	0.036759	0.0438143	0.0484959	0.0396251	0.0448472	0.0330631	0.04184	0.064446	0.0612176	0.0602612	0.0896302	0.0514906	0.0550827	0.0629423	0.0464439	0.0776252	0.0672292	0.0644129
Mdc1,Nrm,Ppp1r18os - chr17:35994679	0.108225	0.158249	0.0333333	0.108225	0.0957265	0.224242	0.0277778	0.204377	0.134921	0.030303	0.0555556	0.184332	0.15873	0.14152	0.195216	0.177439	0.184115	0.209848	0.143304	0.139995	0.0687646	0.1907
Dgkz,Mdk - chr2:91776930	0.5	0.269841	0.216667	0.336111	0.373016	0.444444	0.225397	0.190476	0.14537	0.344444	0.332576	0.5	0.45689	0.369843	0.513445	0.476328	0.448557	0.335875	0.587326	0.474662	0.465152	0.42967
-,Brf1 - chr12:114196453	0.150794	0.3	0.0666667	0.415079	0.3	0.535354	0.151515	0.208333	0.0846561	0.242063	0.336752	0.342857	0.232275	0.288889	0.332804	0.458333	0.413105	0.528042	0.356481	0.337729	0.194444	0.362963
Car5b - chrX:160415964	0.111111	0.130952	0.114286	0.208333	0.122222	0.25	0.122222	0.125	0.0555556	0.0888889	0.166667	0.125	0.208428	0.183966	0.189177	0.149174	0.184815	0.227744	0.19893	0.265653	0.172663	0.142728
Cenpp,Ecm2 - chr13:49626893	0.00297303	0.00505468	0.0109129	0.0121401	0.0142873	0.0116183	0.0083325	0.0127767	0.0125741	0.0189028	0.0143483	0.0125	0.0235933	0.0180568	0.0164931	0.0263934	0.00297619	0.0144448	0.0159314	0.0241604	0.0106018	0.0288547
Gm12953,Gpbp1l1,Tmem69 - chr4:116225392	0.00357457	0.00630648	0.00631822	0.0072119	0.00913417	0.00625789	0.00707527	0.00793832	0.00463096	0.00636688	0.00646349	0.00883874	0.0129542	0.0107005	0.00874388	0.0104131	0.0057733	0.00824491	0.0105532	0.0105808	0.00955585	0.0125969
Gm12953,Gpbp1l1,Tmem69 - chr4:116225396	0.00482281	0.00900418	0.00722837	0.00678884	0.00948422	0.00886126	0.00903392	0.00956178	0.00840635	0.00770149	0.010513	0.0113006	0.0125401	0.0114901	0.0102268	0.0112218	0.00896207	0.0108849	0.00992793	0.0116021	0.00949294	0.0146985
Gm12953,Gpbp1l1,Tmem69 - chr4:116225401	0.00844379	0.0125136	0.0113937	0.0126434	0.0120341	0.0125372	0.012809	0.0128225	0.0128538	0.012604	0.0123894	0.0138795	0.0186586	0.0151805	0.0129523	0.014709	0.0127989	0.0144459	0.0146487	0.0156558	0.011375	0.0177911
Klhdc2,Nemf - chr12:70409412	0.0220743	0.0246192	0.0231904	0.0251299	0.0203797	0.0288267	0.0229223	0.0197717	0.0227161	0.0236712	0.0223826	0.0258017	0.0318533	0.0228265	0.025615	0.018794	0.02317	0.03035	0.029209	0.033037	0.0272547	0.0330563
Rpa1 - chr11:75114086	0.0727124	0.141061	0.0897486	0.115952	0.14305	0.210826	0.146667	0.104858	0.157313	0.18883	0.0993308	0.160152	0.178221	0.148758	0.149043	0.100913	0.0937913	0.161614	0.163711	0.145683	0.133791	0.152859
Sco1 - chr11:66878151	0.00586649	0.00946453	0.011398	0.0173195	0.0188984	0.0139063	0.0147189	0.00922676	0.0133878	0.0155115	0.0113767	0.020131	0.02415	0.0161455	0.0155452	0.0158722	0.0219051	0.013446	0.015694	0.00847577	0.0110729	0.0119309
Ppip5k1 - chr2:121154893	0.0405039	0.0490368	0.0367992	0.0787722	0.0759254	0.0524455	0.058237	0.0515487	0.0314809	0.0664549	0.0289224	0.166667	0.127605	0.0981481	0.0219109	0.0567595	0.0888889	0.122054	0.125982	0.0155039	0.046147	0.0836657
Smg5 - chr3:88156594	0.000433463	0.00384255	0.0104428	0.00582639	0.00567592	0.00689626	0.00889949	0.00675188	0.00856543	0.00769635	0.00417466	0.0145072	0.00853508	0.00538924	0.00916275	0.008924	0.00536899	0.0131298	0.0115106	0.00877668	0.00981348	0.00821837
Car5b - chrX:160416726	0.0063557	0.0095964	0.0119889	0.0141013	0.00817285	0.0096617	0.00812638	0.00718191	0.00788307	0.010677	0.0108485	0.0153386	0.0152398	0.0106722	0.0150389	0.0123871	0.008345	0.019889	0.0160096	0.0143411	0.00971442	0.00357143
Ntan1,Pdxdc1 - chr16:13834085	0.00461452	0.00857013	0.00788306	0.00632879	0.00710488	0.00939756	0.00920361	0.0104788	0.0105973	0.0100847	0.0108831	0.0173423	0.0119329	0.0167503	0.0116213	0.0135538	0.00711825	0.0170644	0.0119425	0.00725532	0.00851094	0.0125035
A930015D03Rik,H2-T24 - chr17:36143421	0.0106348	0.0178033	0.0153708	0.020776	0.0171644	0.0127981	0.015382	0.0190888	0.0194995	0.0150823	0.0175916	0.0310604	0.0234813	0.0195519	0.0189979	0.0146508	0.0106308	0.0232244	0.0234792	0.017871	0.0265176	0.0216631
Agl - chr3:116447040	0.00973619	0.0146965	0.0111933	0.0142288	0.0155307	0.0128861	0.00977527	0.00931707	0.0124288	0.0103355	0.0104623	0.0190293	0.0174512	0.0219138	0.0143256	0.0185912	0.00651028	0.0192836	0.0232627	0.0106662	0.0185961	0.0125615
Nol10 - chr12:17436404	0.00495135	0.0085596	0.00708499	0.0133553	0.0147537	0.0155065	0.0121494	0.0103209	0.0144753	0.00841948	0.00909552	0.00308642	0.0148927	0.0156325	0.00741562	0.00929207	0.0145169	0.0139172	0.00664086	0.00152905	0.011985	0.0120673
Smg5 - chr3:88156569	0.0134362	0.0276024	0.0243094	0.0226807	0.0199566	0.0274917	0.0283463	0.028402	0.0354339	0.0208993	0.0370447	0.00757576	0.0297755	0.0288734	0.0351853	0.0251876	0.0375239	0.0227001	0.0374448	0.0313245	0.0341281	0.0154335
Zfp941 - chr7:147996976	0.0413534	0.103699	0.0331783	0.065479	0.0714599	0.0967694	0.0936638	0.0665025	0.104731	0.0772185	0.110618	0.0526316	0.0950855	0.0512626	0.119535	0.108631	0.103408	0.105238	0.116382	0.0464463	0.097263	0.115785
Mapk14 - chr17:28870819	0.666667	0.944444	0.925926	0.962963	1	0.944444	1	0.933333	0.916667	0.944444	1	1	1	1	1	0.916667	0.933333	0.913725	0.933333	1	1	1
Ddost - chr4:137864247	0.666667	0.957225	0.986667	0.972166	0.958222	0.960463	0.973487	0.960865	0.962354	0.991453	0.981806	1	0.996743	0.996136	0.998181	0.997943	0.999337	0.999445	0.998565	0.998277	0.996598	0.999438
CT030159.2,CT030159.4,Ctsl - chr13:64467953	0.624698	0.941388	0.914672	0.928536	0.89828	0.900097	0.856926	0.887244	0.920098	0.927827	0.943064	0.998051	0.986743	0.987181	0.991589	0.990457	0.987499	0.996448	0.995084	0.992765	0.992427	0.992272
Pqlc1 - chr18:80451146	0.0137401	0.0199548	0.0189518	0.0175067	0.020466	0.019773	0.0186856	0.0183839	0.0211311	0.0193436	0.0196563	0.0215853	0.0188656	0.0206681	0.0192141	0.0204363	0.0212853	0.022306	0.0211326	0.0194827	0.021009	0.0181544
Sfxn2,Wbp1l - chr19:46669659	0.0666667	0.537698	0.398148	0.491005	0.341667	0.489899	0.391667	0.342857	0.592593	0.296296	0.444444	0.543403	0.446625	0.528221	0.293519	0.45977	0.480324	0.469697	0.315245	0.476084	0.414305	0.530756
Sfxn2,Wbp1l - chr19:46669665	0.030303	0.537698	0.346154	0.410714	0.329545	0.405556	0.261905	0.261111	0.481481	0.25	0.365657	0.487847	0.380777	0.459129	0.205473	0.383979	0.414871	0.392434	0.283339	0.442028	0.344071	0.43254
Copa,Gm37756,Gm38164 - chr1:174022479	0.0416667	0.329645	0.255983	0.260965	0.197955	0.131997	0.185749	0.10421	0.136835	0.174074	0.243868	0.305365	0.26078	0.23025	0.24581	0.335993	0.282527	0.244102	0.233486	0.213972	0.217208	0.265522
Trim36 - chr18:46325559	0.00321706	0.00728679	0.00541258	0.00730953	0.00601655	0.00665828	0.00613641	0.0046138	0.006668	0.00600884	0.00533271	0.00611814	0.00549215	0.00540328	0.0073806	0.00634124	0.00812199	0.00713112	0.00600601	0.0077778	0.00699329	0.00791434
Gm10840,Limd2,Map3k3 - chr11:106018359	0.32381	0.517249	0.68043	0.480201	0.693311	0.514286	0.722222	0.422222	0.628788	0.759722	0.676224	0.857505	0.741434	0.665825	0.559259	0.787197	0.835191	0.742521	0.78471	0.735354	0.796056	0.732353
Ap1m1 - chr8:74775772	0.504274	0.774573	0.683041	0.703704	0.75626	0.720202	0.605769	0.695833	0.745874	0.794643	0.806383	0.958372	0.922313	0.940803	0.935097	0.950904	0.958423	0.910179	0.93703	0.924	0.93066	0.950028
Med28 - chr5:45913747	0.560777	0.792918	0.806524	0.836709	0.814815	0.829091	0.835986	0.759892	0.879933	0.787232	0.855499	0.994804	0.980086	0.990173	0.989825	0.994204	0.980247	0.989594	0.98403	0.982774	0.995581	0.98613
Dazap1,Gm15122,Mir6911 - chr10:79743763	0.516544	0.799777	0.80148	0.752942	0.768421	0.781252	0.730919	0.797508	0.841414	0.822548	0.727443	0.968467	0.966891	0.983676	0.975436	0.964619	0.976128	0.976008	0.959798	0.972313	0.973286	0.975894
Eif3g,Gm23008,Ppan - chr9:20699416	0.574846	0.868398	0.842811	0.846099	0.807218	0.808477	0.787932	0.799464	0.865955	0.845978	0.825721	0.974202	0.947663	0.96107	0.949789	0.96567	0.968561	0.97841	0.958054	0.96731	0.973464	0.939042
Eif3g,Gm23008,Ppan - chr9:20699419	0.583761	0.882875	0.83687	0.84733	0.80374	0.787145	0.782732	0.806557	0.878442	0.843418	0.837612	0.971468	0.947403	0.962755	0.952305	0.965667	0.971238	0.976672	0.95825	0.971792	0.973766	0.937538
Akap8l - chr17:32473150	0.633333	0.847222	0.80303	0.972222	0.838095	0.766667	0.805556	0.8	0.761905	0.966667	0.875	0.942434	1	0.990741	0.976068	0.927728	1	0.981703	0.972503	0.985507	0.981481	0.971014
Gm26446,Ppp1r7 - chr1:95257392	0.569444	0.789683	0.893308	0.829219	0.946581	0.708333	0.916667	0.865385	0.775253	0.958333	0.877288	0.991228	0.97561	1	0.994048	0.991453	1	0.99187	0.985816	1	0.981036	0.993333
-,Arpc5l,Rpl35,Wdr38 - chr2:38863867	0.527778	0.774964	0.795821	0.784513	0.876254	0.76728	0.823047	0.838235	0.755454	0.81195	0.773625	0.947489	0.951277	0.954543	0.947975	0.964773	0.971356	0.936119	0.961268	0.950907	0.972636	0.954346
Ash1l - chr3:88829208	0.666667	0.770833	0.833333	0.727778	0.741013	0.798972	0.703704	0.741667	0.814286	0.85	0.739833	0.9	0.5	0.822222	0.916667	0.6	0.7	0.416667	0.857143	0.805556	0.916667	0.933333
Ash1l - chr3:88829224	0.564103	0.452778	0.489899	0.404762	0.445022	0.55202	0.529762	0.387879	0.558303	0.603507	0.314815	0.5	0.133333	0.655556	0.5	0.333333	0.277778	0.25	0.513889	0.555556	0.563492	0.422222
Ash1l - chr3:88829228	0.507937	0.261634	0.277778	0.282051	0.4	0.384615	0.361111	0.320635	0.505128	0.462185	0.201786	0.291667	0.0666667	0.47619	0.472222	0.333333	0.111111	0.25	0.458333	0.464286	0.5	0.361111
Slfn5,Slfn5os - chr11:82776159	0.016553	0.0176276	0.020493	0.0226188	0.0182282	0.0180934	0.0141682	0.0151445	0.0195863	0.0129205	0.0111354	0.010765	0.00836847	0.0209836	0.0142649	0.0140947	0.0182961	0.019472	0.0114508	0.0223695	0.0184367	0.0222471
Coq5,Dynll1,Gm13830 - chr5:115747618	0.0122139	0.0157619	0.0211723	0.0215787	0.0203661	0.0190443	0.0197446	0.0208614	0.0204757	0.0192945	0.015857	0.0197929	0.0139545	0.0180151	0.0172084	0.0235853	0.0200047	0.0198577	0.0145577	0.0243617	0.0238163	0.0225922
Gm15560,Ppil4 - chr10:7532794	0.233333	0.401587	0.311905	0.310745	0.354396	0.472222	0.474074	0.161905	0.648148	0.305556	0.458333	0.466667	0.222222	0.625	0.324242	0.569444	0.579365	0.5	0.305952	0.412879	0.396296	0.592857
Slfn5,Slfn5os - chr11:82776086	0.00452339	0.0082795	0.00698782	0.00605506	0.00705991	0.00736942	0.0113813	0.00588381	0.00951788	0.00718336	0.00520243	0.00884649	0.00344441	0.00540517	0.00950798	0.00655379	0.00626639	0.00812256	0.00240178	0.00700608	0.00798638	0.00864348
Pabpc1 - chr15:36534482	0.0288486	0.0227453	0.0154584	0.0328849	0.0233146	0.031898	0.0292162	0.0216901	0.0322083	0.0317007	0.0264773	0.0232558	0.0278881	0.0114742	0.0399113	0.0371631	0.0399919	0.0410202	0.0432479	0.0399191	0.034644	0.0152426
Rab11b - chr17:33884473	0.0215773	0.0243058	0.0264377	0.028741	0.0302711	0.0293261	0.0287533	0.0276579	0.0324716	0.029409	0.0272325	0.0242499	0.0243933	0.0270462	0.0322812	0.036175	0.0269685	0.0348306	0.0291256	0.0356357	0.0293287	0.020208
Fadd,Faddos - chr7:151764635	0.00924089	0.0193062	0.0198218	0.0214879	0.0153725	0.0224374	0.0179635	0.0216673	0.021394	0.0213125	0.0183915	0.0126834	0.0210328	0.0118548	0.0201655	0.0243089	0.0154407	0.0244456	0.0275133	0.020619	0.0178139	0.0155475
Slfn5,Slfn5os - chr11:82776102	0.00760865	0.0124406	0.00962706	0.0147863	0.0080838	0.011634	0.0141359	0.0107605	0.0109036	0.012003	0.0101726	0.0130666	0.0106128	0.0124578	0.0156935	0.0147464	0.0139022	0.0121345	0.012093	0.0103364	0.0145407	0.0117216
A930015D03Rik,H2-T24 - chr17:36143433	0.00154027	0.0035709	0.0023167	0.00448838	0.0035263	0.00188304	0.00312229	0.00185889	0.00243747	0.00358129	0.00215014	0.00341789	0.000878349	0.00206068	0.00395924	0.00226684	0.0016129	0.00203227	0.00400435	0.00195722	0.0028153	0.000491642
Gla,Rpl36a - chrX:131123115	0.0171758	0.0589529	0.0684317	0.0475644	0.0279427	0.0295639	0.0479212	0.065655	0.0545378	0.0637764	0.0639078	0.103943	0.0394872	0.0382784	0.047586	0.0355556	0.0151515	0.0711866	0.0934642	0.105266	0.0647784	0.0740741
Btk,Gla,Rpl36a - chrX:131123100	0.0231636	0.0806037	0.0833489	0.0566259	0.0259322	0.0512566	0.0641241	0.0931996	0.0808337	0.0626863	0.0643289	0.100606	0.0460715	0.0360013	0.0734903	0.037037	0.0375	0.0615131	0.0717646	0.110858	0.0768147	0.0614256
Btk,Gla,Rpl36a - chrX:131123109	0.0192525	0.0745612	0.0776324	0.0465153	0.0251259	0.05	0.0589727	0.0783425	0.0770941	0.0605414	0.0624007	0.0925156	0.0420635	0.036289	0.0644143	0.0428571	0.0366569	0.0678603	0.0684412	0.100404	0.0742894	0.0607311
-,Rmi2 - chr16:10842115	0.00536136	0.00869716	0.0125753	0.00887982	0.00862564	0.0127892	0.0058885	0.0129828	0.0151034	0.0105079	0.0101546	0.0166314	0.0100297	0.00964287	0.00720638	0.002886	0.0104338	0.0167118	0.0161955	0.0112331	0.00529234	0.0113097
Bbs1,Gm25334 - chr19:4901492	0.0021097	0.0139503	0.0144423	0.00985502	0.00708208	0.0134076	0.00794711	0.0142206	0.0184166	0.00898153	0.0170537	0.0184829	0.0130744	0.00875421	0.0130719	0.00826734	0.0111464	0.0115597	0.0173872	0.0143215	0.0132622	0.0158446
Cpsf4l - chr11:113561969	0.0125319	0.0207133	0.015954	0.0232767	0.0215124	0.0148269	0.0198841	0.0216701	0.0185617	0.0188876	0.0177388	0.0256819	0.020949	0.0273486	0.015625	0.00314465	0.028704	0.0186162	0.0166067	0.0214872	0.0165055	0.00804078
-,Sppl2a - chr2:126718587	0.0091733	0.021528	0.0198122	0.0183938	0.0107076	0.0132954	0.0109939	0.0100463	0.013813	0.012056	0.0224809	0.0212853	0.0223666	0.0164673	0.0199386	0.0025641	0.0233338	0.0228851	0.0187489	0.024861	0.0217617	0.00678189
Rgs9 - chr11:109118715	0.00484922	0.0118644	0.00935288	0.0105303	0.0119615	0.0136478	0.0091563	0.0073483	0.0083867	0.0143659	0.00627349	0.0102428	0.0096352	0.0142651	0.00936142	0.00425532	0.0142493	0.00999012	0.00693828	0.0111604	0.0164502	0.00792671
Cd52,Crybg2 - chr4:133645748	0.0075599	0.0132405	0.0100102	0.0152489	0.014888	0.0129108	0.0155341	0.0161046	0.00956888	0.0116337	0.00887203	0.0139428	0.00961298	0.0174934	0.0190601	0.00601856	0.0155347	0.0103191	0.0130138	0.0147309	0.0175596	0.0100512
Gm12953,Gpbp1l1,Tmem69 - chr4:116225422	0.00666799	0.00958712	0.00885025	0.0103847	0.00966577	0.00841521	0.00793213	0.00780943	0.00890892	0.0072898	0.00900306	0.00611797	0.0103956	0.0078417	0.00909203	0.0105567	0.00846041	0.0104891	0.00899646	0.0096946	0.00683323	0.0055344
-,Car5b - chrX:160416357	0.00457481	0.0147118	0.0147181	0.0165352	0.0184943	0.0131637	0.0114646	0.0149756	0.0106695	0.0126686	0.0129136	0.0101996	0.010891	0.00513602	0.00242567	0.0120114	0.0189712	0.0195849	0.0181815	0.0199788	0.00369912	0.00595366
Tubgcp4 - chr2:121011461	0.0124841	0.0167793	0.0244243	0.0216358	0.0222699	0.0199095	0.0188101	0.0217647	0.017489	0.0161361	0.0217356	0.0146965	0.021245	0.0130919	0.0167886	0.0196121	0.0181831	0.0175349	0.0175809	0.0189681	0.0136552	0.015382
Soat1 - chr1:158359358	0.0102024	0.0138971	0.0235805	0.0247507	0.0224146	0.0180988	0.0180689	0.0211661	0.0154494	0.0188266	0.017553	0.0147059	0.0190778	0.0159001	0.0124469	0.0185049	0.0192119	0.0228827	0.0187374	0.019761	0.0229867	0.0131434
Med18 - chr4:132014893	0.00153646	0.00647838	0.00608752	0.00703874	0.00604962	0.00210699	0.00465557	0.00433081	0.00514364	0.00681516	0.00777607	0.00285714	0.00311526	0.00683403	0.00245991	0.00511838	0.00655831	0.0045045	0.00221484	0.00478469	0.00162602	0.00275482
Kcnk6 - chr7:30007863	0.0107725	0.0204676	0.0189803	0.0179577	0.0165002	0.0118452	0.0186942	0.0129412	0.0179345	0.019557	0.0228258	0.00662637	0.0160291	0.0127454	0.0132987	0.0183729	0.0140521	0.0116353	0.0131481	0.00903099	0.0117876	0.00683274
Cdc123 - chr2:5715492	0.0110405	0.0150629	0.0104855	0.0166481	0.0142261	0.010565	0.0252047	0.0174417	0.0145875	0.0221309	0.0224083	0.00697674	0.00743211	0.0135993	0.0111502	0.00776119	0.0214981	0.0120383	0.0119395	0.0196064	0.00999188	0.00469503
Pqlc1 - chr18:80451116	0.00250075	0.00588484	0.00428836	0.00924447	0.00594657	0.00545955	0.00788677	0.00747587	0.00697883	0.00855593	0.00566528	0.00376344	0.00461335	0.00679386	0.0061191	0.00355847	0.00774399	0.00429808	0.00519681	0.00350373	0.00308224	0.00400571
Car5b - chrX:160414879	0.0252454	0.0585217	0.0676934	0.193661	0.103998	0.0845583	0.125213	0.111616	0.110554	0.176998	0.132258	0.0935185	0.0138889	0.1	0.112374	0.0822222	0.108547	0.0561241	0.018018	0.0442105	0.0740741	0.0580808
Sdhaf2 - chr19:10590903	0.0195282	0.0247507	0.0226832	0.0243667	0.0183549	0.0179537	0.0232276	0.0186722	0.0216788	0.0203769	0.017028	0.0137431	0.013506	0.0174616	0.0169601	0.015861	0.0230303	0.0139802	0.0173098	0.0106898	0.0100559	0.00973916
Gm12953,Gpbp1l1,Tmem69 - chr4:116225417	0.00620438	0.0127573	0.00940401	0.0115019	0.00928397	0.00909457	0.0106006	0.0105108	0.00997843	0.0106283	0.0108781	0.00841532	0.00860832	0.00764309	0.00843768	0.00725974	0.010461	0.00640233	0.00747385	0.00780789	0.00452824	0.0068238
Iws1 - chr18:32262585	0.0158209	0.0311343	0.0177463	0.0207342	0.0127337	0.0237794	0.0213539	0.014396	0.0200723	0.0167007	0.0250195	0.0221851	0.0142915	0.020988	0.0283585	0.0231796	0.0310954	0.0147741	0.0147964	0.0134512	0.0183538	0.00954301
-,Sppl2a - chr2:126718578	0.00788478	0.0206523	0.0266161	0.020242	0.0111003	0.0129551	0.0140208	0.0111768	0.0133097	0.0238432	0.0188977	0.0182758	0.00584145	0.0112783	0.0233881	0.0120027	0.0274615	0.00409986	0.0118747	0.00988064	0.0124802	0.00673445
Dnase2a,Mast1 - chr8:87435079	0.02377	0.0326206	0.0415598	0.0316639	0.0286768	0.0350091	0.0282666	0.0327583	0.0314997	0.0293165	0.0377929	0.0366077	0.0110434	0.0199061	0.0243359	0.0281877	0.0275495	0.0224038	0.0329776	0.0243864	0.0301016	0.02801
6030458C11Rik - chr15:12739626	0.0129946	0.0127453	0.0138817	0.0126059	0.0121194	0.013464	0.017663	0.0154412	0.00932052	0.0116051	0.0113936	0.0149283	0.00790745	0.00529168	0.00892875	0.0131348	0.0134304	0.00876833	0.00858945	0.009324	0.010151	0.0122748
Gga2,Gm44987 - chr7:129131157	0.00645929	0.00998194	0.0126593	0.0111667	0.00955465	0.00989539	0.014672	0.0123757	0.00820334	0.00912177	0.0121045	0.016896	0.00795535	0.00842407	0.0103052	0.0103322	0.0122202	0.0159361	0.011062	0.00789304	0.0165395	0.00393197
Ccdc127,Lrrc14b - chr13:74497736	0.161716	0.188025	0.228305	0.190626	0.191572	0.17019	0.197721	0.163841	0.173383	0.19869	0.18514	0.209614	0.134444	0.113991	0.168103	0.106645	0.184475	0.195673	0.118615	0.153699	0.206759	0.0867001
Gm37988,Lypla1 - chr1:4831623	0.095679	0.112347	0.0981277	0.104756	0.103586	0.11164	0.0767551	0.117992	0.112206	0.122892	0.0735931	0.171429	0.0597148	0.0251662	0.0869396	0.0741962	0.126863	0.121206	0.00925926	0.133394	0.104332	0.0608305
Pxmp4 - chr2:154412832	0.0255021	0.0491477	0.036087	0.0464182	0.0370453	0.0407199	0.0446059	0.0447384	0.0419896	0.0390937	0.0433532	0.0220271	0.0386767	0.0281832	0.0370216	0.0235585	0.0433063	0.031073	0.0317977	0.0277476	0.043543	0.032693
Pxmp4 - chr2:154412834	0.0137299	0.0213559	0.0179278	0.0211675	0.0227744	0.0225315	0.0233577	0.0240569	0.0174684	0.0232933	0.0177877	0.0113636	0.0195276	0.0180717	0.0197701	0.00878191	0.0212583	0.0182215	0.0184048	0.0161143	0.0262001	0.0141861
2810403A07Rik,Gm43714 - chr3:88491875	0.00670002	0.0149657	0.0142292	0.012533	0.0142687	0.0135984	0.0139058	0.0106331	0.00990157	0.0147696	0.0128479	0.00983746	0.00761057	0.00771885	0.0077302	0.00908559	0.0113365	0.0129707	0.0110979	0.00652265	0.0110584	0.00223714
Pxmp4 - chr2:154412822	0.0252745	0.0351923	0.0309896	0.0291864	0.034175	0.0276047	0.0274668	0.0298533	0.0255416	0.0381023	0.0251634	0.0254933	0.0239567	0.0229056	0.020739	0.0130774	0.0342818	0.0342276	0.0319701	0.0226937	0.0380371	0.0162713
Ccdc189,Phkg2 - chr7:134722732	0.0172682	0.0177927	0.0277931	0.0245286	0.0247092	0.0209771	0.0184188	0.0238627	0.0324704	0.0284134	0.0283194	0.022019	0.024761	0.0200204	0.0269515	0.0320353	0.0217241	0.011048	0.0134827	0.00472111	0.0136897	0.0286779
4833417C18Rik,B4galnt2,Gm11534 - chr11:95726383	0.00994592	0.0139733	0.0115361	0.0172169	0.0121925	0.0153549	0.0126758	0.0134502	0.0134225	0.0152598	0.0187858	0.0160728	0.0104433	0.0109973	0.0136571	0.0116278	0.0131839	0.00878946	0.00937485	0.00718717	0.0133885	0.0131453
Lsamp - chr16:41984270	0.444444	0.8	0.837607	0.788462	0.740079	0.645238	0.57265	0.402564	0.680519	0.505848	0.833333	1	0.666667	0.555556	0.805861	0.666667	0.555556	0.333333	0.238095	0.2	0.666667	0.766667
Lsamp - chr16:41984286	0.444444	0.8	0.837607	0.788462	0.719444	0.645238	0.548611	0.402564	0.680519	0.487329	0.833333	1	0.666667	0.555556	0.805861	0.666667	0.555556	0.333333	0.238095	0.2	0.666667	0.766667
- - chr17:17325021	0.378917	0.334225	0.584524	0.43573	0.501984	0.515622	0.496633	0.444872	0.270853	0.492734	0.379243	0.375	0.460784	0.555556	0.330357	0.616667	0.555556	0.333333	0.333333	0.0666667	0.358333	0.333333
Bloc1s3,Trappc6a - chr7:20091437	0.03015	0.0508049	0.0756292	0.0549136	0.0503154	0.0706186	0.05731	0.0566637	0.0499846	0.0677543	0.0526411	0.0599856	0.0700632	0.0737961	0.0573531	0.0806282	0.0521169	0.0473773	0.0584169	0.028663	0.0701841	0.0402574
Poli - chr18:70684634	0.026672	0.0453706	0.0489249	0.046116	0.0370667	0.0489176	0.0430966	0.0367123	0.0416382	0.040111	0.0349061	0.0543384	0.0526122	0.0387882	0.0424032	0.0499292	0.0378578	0.0472554	0.0379066	0.0372548	0.0310709	0.0359742
Zbtb8a,Zbtb8os - chr4:129031031	0.0865317	0.106266	0.106402	0.107413	0.104497	0.106976	0.0799552	0.105974	0.13812	0.133958	0.104359	0.173077	0.135328	0.146649	0.117297	0.152603	0.15894	0.130914	0.0390492	0.0939968	0.0588427	0.084238
Kbtbd2 - chr6:56728448	0.0010929	0.00497415	0.00524395	0.00393897	0.00226217	0.0093719	0.00932678	0.00876292	0.00579103	0.00821311	0.00782747	0.00622407	0.00795491	0.00760691	0.0108519	0.00707472	0.00576309	0.00681952	0.00695164	0.00411439	0.00620061	0.00776747
Gnl3l - chrX:147418365	0.00198553	0.00714684	0.00643422	0.00462825	0.00354476	0.0106474	0.00689446	0.0060995	0.00694102	0.00499387	0.00808887	0.00643683	0.00631149	0.00779378	0.00877805	0.00456621	0.00616443	0.00754227	0.00740902	0.00228094	0.00422352	0.00567376
AC154510.1,Zfp874b - chr13:67573998	0.139678	0.231124	0.205303	0.246477	0.234752	0.289995	0.210572	0.24483	0.237973	0.29236	0.258619	0.206214	0.14957	0.187166	0.316903	0.224022	0.210809	0.208305	0.283516	0.246226	0.203751	0.282794
Pqlc1 - chr18:80451190	0.00237883	0.00423617	0.00518634	0.00637432	0.00435786	0.00956102	0.007366	0.0072574	0.00658763	0.00785443	0.0061203	0.0011655	0.0038716	0.0120986	0.00894983	0.008881	0.00566952	0.00518068	0.00587036	0.00575695	0.00629137	0.010102
C5ar2,Gm26473 - chr7:16820338	0.0227991	0.0346818	0.0453747	0.0445408	0.0363618	0.0411931	0.0363464	0.0500817	0.032899	0.0470215	0.0435635	0.0427052	0.045094	0.0371797	0.0462524	0.0460041	0.0438039	0.0396478	0.0402488	0.0437697	0.0387858	0.0418774
Trappc9 - chr15:72825144	0.0129693	0.0247341	0.0246241	0.026802	0.0178082	0.0216764	0.0234921	0.0251261	0.0234157	0.0266719	0.02456	0.0332759	0.0237882	0.0301232	0.0290748	0.0230494	0.0209817	0.0170395	0.0238108	0.0259849	0.0282376	0.0289382
Grik1 - chr16:87945624	0.0273985	0.0546093	0.0666276	0.0669117	0.0487469	0.0421074	0.0617134	0.0554476	0.0550185	0.0752147	0.0608628	0.0903479	0.0825834	0.0676515	0.0767473	0.0700323	0.0606887	0.0433049	0.0416991	0.0626664	0.0437633	0.0688146
4930402H24Rik,A730017L22Rik - chr2:130698382	0.31746	0.513889	0.619048	0.454365	0.75	0.663492	0.555556	0.725589	0.662963	0.833333	0.638889	0.857143	0.587302	0.851852	0.669444	0.535354	0.722222	0.666667	0.777778	0.47619	0.457143	0.574074
Gm12953,Gpbp1l1,Tmem69 - chr4:116225413	0.0174362	0.0276648	0.0228797	0.0202779	0.0263004	0.0244838	0.0279931	0.0267186	0.0252403	0.0277451	0.0271639	0.0257717	0.0243432	0.026964	0.0250906	0.0265927	0.0197927	0.0214734	0.0253387	0.0222251	0.0191107	0.0256791
-,Rsrc2 - chr5:124192076	0.00921312	0.0115781	0.0145826	0.0134332	0.0172724	0.0133556	0.0154465	0.0111747	0.013797	0.0154277	0.0131295	0.0148607	0.0170922	0.0171359	0.0118968	0.0170575	0.00930981	0.0109405	0.0146563	0.010232	0.00716506	0.0113357
Gm37676,Nucks1 - chr1:133828093	0.00604816	0.00662325	0.00874597	0.00836866	0.0103513	0.00727673	0.0102772	0.00726222	0.00587149	0.00897022	0.00817175	0.00582578	0.0107892	0.00529262	0.0046272	0.00644065	0.00348915	0.0049309	0.00501465	0.00406682	0.00181147	0.00531168
Ndufaf8,Tepsin - chr11:119958616	0.00544434	0.00711112	0.00988109	0.00854945	0.00917516	0.0074688	0.00895275	0.00742248	0.00802458	0.00748822	0.00937804	0.00662747	0.00920837	0.00757129	0.00515928	0.00773317	0.00491624	0.00517665	0.00700487	0.00588489	0.00394495	0.00675551
-,Malt1 - chr18:65638099	0.00537791	0.00648117	0.00546027	0.00675843	0.00666373	0.00663156	0.00610979	0.00694998	0.00641583	0.00708832	0.00757677	0.00414553	0.00640915	0.00528014	0.00614979	0.0069517	0.00425275	0.00435089	0.00735534	0.00287991	0.00330383	0.00341679
Slc22a15 - chr3:101725003	0.0726087	0.08076	0.0803463	0.0836969	0.116154	0.0846792	0.0814183	0.0968781	0.0794092	0.0665842	0.0597644	0.0458464	0.104233	0.0577047	0.117784	0.114683	0.0214634	0.0613836	0.0626294	0.0464471	0.0246914	0.0380952
Gm10778 - chr10:81128022	0.287879	0.733333	0.655345	0.542929	0.703704	0.869048	0.683333	0.691919	0.702991	0.640873	0.768921	0.75	0.666667	0.462963	0.555556	0.541667	0.3	0.833333	0.0555556	0.111111	0.611111	0.25
Cdk11b,Gm10563,Gm16023,Slc35e2 - chr4:154996448	0.00674073	0.0228989	0.0228872	0.0211316	0.0192451	0.0204062	0.0197572	0.0228696	0.0219623	0.0183853	0.022288	0.0258886	0.0186415	0.0240162	0.0209986	0.00689655	0.0130388	0.0171776	0.0100712	0.0128756	0.00423515	0.0129074
-,Car5b - chrX:160416380	0.0114317	0.0184863	0.0214868	0.0151277	0.0178766	0.0181918	0.0207857	0.0236085	0.0162111	0.0184996	0.0186517	0.0214525	0.0237946	0.0186291	0.0154961	0.0162646	0.0197451	0.021252	0.0155175	0.0159096	0.0102785	0.00712484
L1cam - chrX:71109181	0.0106592	0.0197885	0.0220499	0.018947	0.0159524	0.0183897	0.0210494	0.0174006	0.0192991	0.0174103	0.0156238	0.00979141	0.0161884	0.0174703	0.0186268	0.0125202	0.0137987	0.0179489	0.0101326	0.0134364	0.00857751	0.00520528
Ccdc189,Phkg2 - chr7:134722708	0.0161133	0.0231335	0.0224138	0.0231689	0.0211792	0.0243713	0.0247211	0.0217288	0.0231652	0.0188974	0.0223345	0.0177176	0.0227347	0.0194921	0.0219245	0.0197124	0.0192962	0.0144511	0.0138994	0.0199425	0.0216285	0.0191733
Mau2 - chr8:72541205	0.00451223	0.0140056	0.0147987	0.0108692	0.0108506	0.0161778	0.0161314	0.0132904	0.0147202	0.010453	0.0134882	0.0134013	0.0138173	0.008949	0.0127773	0.0122123	0.0068204	0.012085	0.00594156	0.0133272	0.0138554	0.0103529
Slfn5,Slfn5os - chr11:82776097	0.00538605	0.0111862	0.00913501	0.0122118	0.010312	0.0108326	0.0117425	0.0101329	0.00985736	0.0086307	0.00898815	0.0136971	0.00657023	0.0111082	0.00949258	0.0093695	0.00606147	0.00492617	0.00871687	0.00985426	0.00720553	0.00780749
Coq5,Dynll1,Gm13830 - chr5:115747617	0.00444095	0.00780358	0.00682006	0.00921657	0.00704636	0.00755531	0.00798736	0.0058692	0.00610601	0.00730422	0.00827167	0.00884782	0.00602642	0.0108806	0.00576251	0.00514677	0.0015949	0.00303234	0.00233544	0.00660202	0.0071733	0.00480813
Zfp12,Zfp316 - chr5:144008300	0.00573595	0.00917773	0.00953896	0.011292	0.00783322	0.011197	0.00983595	0.00908359	0.00940272	0.011723	0.0106142	0.0125367	0.00723114	0.00794645	0.0108921	0.00585567	0.00777328	0.00881495	0.00503531	0.00985747	0.00764904	0.0053541
-,Gm24148,Mir3535,Ncl,Snora75 - chr1:88244311	0.0142879	0.0443122	0.0547491	0.0836616	0.0736755	0.0763641	0.0701432	0.0543741	0.0710437	0.062728	0.0540447	0.0550144	0.0386789	0.0547223	0.0705534	0.040659	0.0399209	0.0462588	0.0346949	0.0670172	0.0492528	0.0362233
-,Abhd17a,Gm26710,Klf16 - chr10:80042939	0.0301084	0.0410002	0.0429746	0.0392022	0.046243	0.0374524	0.0452683	0.0400233	0.0358132	0.0339369	0.0432629	0.0287456	0.0378571	0.0365029	0.0431132	0.0270115	0.0451017	0.0188041	0.0431717	0.0501094	0.0250135	0.0259586
Fam160b2,Nudt18 - chr14:70983563	0.231593	0.273418	0.298518	0.273038	0.336734	0.270927	0.28386	0.265762	0.272466	0.26288	0.356639	0.277273	0.229365	0.208725	0.207724	0.117725	0.330556	0.114379	0.261183	0.29329	0.198616	0.336111
Kcnk6 - chr7:30007841	0.0129569	0.0167601	0.017481	0.0209837	0.0133633	0.0145424	0.0202635	0.0106717	0.017089	0.0177284	0.0156542	0.0176591	0.010307	0.0131815	0.0113017	0.0172594	0.0150257	0.00315256	0.0182753	0.0160871	0.0108551	0.0100252
Agl - chr3:116447064	0.519504	0.771142	0.768899	0.757868	0.799105	0.76965	0.767439	0.774539	0.769991	0.794259	0.793217	0.719909	0.658708	0.611349	0.599664	0.688053	0.748117	0.637301	0.629088	0.718473	0.636213	0.61412
-,Gm24148,Mir3535,Ncl,Snora75 - chr1:88244300	0.0560354	0.125669	0.107854	0.147407	0.151052	0.12737	0.152628	0.136374	0.135986	0.136508	0.134267	0.140791	0.113861	0.138197	0.121737	0.124502	0.127033	0.107179	0.130931	0.140852	0.118713	0.106468
-,Gm24148,Mir3535,Ncl,Snora75 - chr1:88244305	0.0275444	0.0936424	0.0741599	0.105991	0.0918716	0.109126	0.11527	0.105599	0.103519	0.0864057	0.0893833	0.0810394	0.0633101	0.0856088	0.0851997	0.0651034	0.0793138	0.0706234	0.0732816	0.110268	0.0765627	0.0761664
AC152453.1,Gm16268,Nt5dc3,Stab2 - chr10:86299039	0.00960539	0.0141385	0.0161787	0.0179001	0.0103727	0.00876645	0.0129398	0.0136717	0.0175657	0.0177816	0.0147948	0.0112384	0.00565639	0.0144746	0.0111538	0.0133949	0.00899446	0.0105694	0.0108391	0.00951992	0.00978513	0.011952
Bbs1,Zdhhc24 - chr19:4888591	0.00669969	0.00790973	0.0105691	0.0101771	0.00681699	0.0069254	0.0104772	0.0069455	0.00983911	0.00919278	0.00998869	0.00625	0.00705457	0.00944935	0.00594626	0.00784491	0.00504624	0.00854408	0.00948003	0.00886698	0.0045066	0.00882485
Icam1 - chr9:20823954	0.02794	0.0403809	0.0308413	0.0351711	0.0338992	0.0426083	0.0362026	0.0393459	0.0368915	0.0403765	0.04035	0.0240077	0.0375373	0.0369825	0.0199686	0.0338429	0.0329678	0.0303434	0.0303848	0.0283803	0.0162381	0.0272111
Mir3062,Pfas - chr11:68800389	0.00621678	0.0130689	0.0144979	0.0136457	0.0149286	0.0134052	0.012297	0.0158228	0.0119679	0.0116651	0.0160977	0.009914	0.0125697	0.0123837	0.0102919	0.0126441	0.0139077	0.0110791	0.0121996	0.011066	0.00601859	0.00947708
Khdc3,Rab27a - chr9:72945061	0.0110403	0.0166325	0.0136396	0.0133285	0.0163571	0.0151481	0.0129627	0.0132174	0.0127009	0.013853	0.0152807	0.00779203	0.0117413	0.0146104	0.0109318	0.0143457	0.0112154	0.0136848	0.0161962	0.0126682	0.0114387	0.0145805
AC152453.1,Gm16268,Nt5dc3,Stab2 - chr10:86299065	0.0151648	0.0210689	0.0178582	0.0233462	0.0215239	0.0186036	0.0209319	0.0205957	0.0218532	0.0218611	0.0207319	0.00716993	0.0162343	0.0136697	0.0165907	0.0180253	0.0155749	0.0175571	0.0183547	0.018514	0.0157271	0.0195057
Rgl2,Tapbp - chr17:34065501	0.00946873	0.0161653	0.0154886	0.0152701	0.0165499	0.0129853	0.0141736	0.0131463	0.0159137	0.0130058	0.012053	0.0033389	0.0116757	0.0118064	0.0107711	0.013857	0.0114112	0.00973112	0.0120006	0.0107129	0.0125827	0.00981231
Mnat1 - chr12:74271056	0.00472422	0.00648809	0.00713826	0.0100858	0.00687364	0.00872999	0.00933536	0.0105669	0.0112537	0.0125188	0.0100192	0.00813422	0.00704288	0.00674045	0.00320361	0.00781757	0.00504195	0.0053712	0.00880247	0.00888792	0.0127655	0.0116111
Soat1 - chr1:158359340	0.00510371	0.0058	0.00893077	0.00850715	0.0087978	0.0101093	0.0100015	0.00994805	0.00825549	0.00699454	0.00885954	0.00936263	0.00782976	0.00827683	0.00665337	0.00655487	0.00749819	0.00451209	0.00987872	0.00721397	0.00730379	0.00826136
Kpna4 - chr3:68876636	0.0222222	0.0144928	0.121707	0.06185	0.0792038	0.0721872	0.089899	0.140741	0.138584	0.0629984	0.131478	0.113479	0.0793482	0.0731672	0.0801587	0.09873	0.0833101	0.0658582	0.0804959	0.0843115	0.104002	0.0400412
Acad9,Gm43079,Gm43205 - chr3:35991496	0.608206	0.834821	0.880775	0.831412	0.789598	0.778081	0.79254	0.746784	0.823546	0.874813	0.824676	0.739282	0.765056	0.677692	0.81147	0.79232	0.692625	0.761813	0.724715	0.79425	0.846335	0.76004
Gm10778 - chr10:81127962	0.449735	0.661667	0.612698	0.735472	0.600122	0.75848	0.801587	0.610008	0.781313	0.869281	0.724817	0.6875	0.692641	0.804233	0.862963	0.708547	0.319444	0.572222	0.701299	0.683333	0.84127	0.430556
Gm4767 - chr10:81287091	0.449735	0.687371	0.68661	0.775	0.600122	0.774074	0.801587	0.610008	0.831313	0.913725	0.738492	0.6875	0.785714	0.804233	0.866667	0.7338	0.349206	0.709804	0.796537	0.683333	0.84127	0.460317
2610507B11Rik,BC030499,Gm3948 - chr11:78107262	0.0589763	0.120285	0.138416	0.120855	0.159236	0.122229	0.111416	0.115131	0.105178	0.129614	0.0945515	0.153289	0.154393	0.110841	0.145934	0.100957	0.114179	0.11538	0.142247	0.164812	0.167453	0.116182
-,Nol10 - chr12:17436659	0.259259	0.732906	0.521678	0.650794	0.512698	0.732213	0.659091	0.654915	0.641077	0.658184	0.604762	0.678763	0.660125	0.574085	0.665232	0.572494	0.646284	0.599751	0.721517	0.570326	0.722037	0.573756
Gmip,Lpar2 - chr8:72342766	0.00777819	0.0278807	0.0261501	0.0300052	0.0231083	0.0284185	0.0287271	0.0238246	0.0247518	0.0283564	0.0218744	0.0234038	0.0256467	0.0186953	0.0225848	0.011167	0.0234179	0.0228959	0.0220163	0.016603	0.0311027	0.0239339
Zfp605 - chr5:110558744	0.195161	0.325157	0.345641	0.412541	0.26748	0.288446	0.376749	0.346234	0.347842	0.315076	0.364518	0.334567	0.403651	0.302564	0.369401	0.24807	0.377258	0.318512	0.339286	0.349275	0.315502	0.339316
Acad12 - chr5:122052955	0.0094933	0.0257517	0.0226604	0.0259866	0.014952	0.0238657	0.0221455	0.0181491	0.0221395	0.0226962	0.0277898	0.0198363	0.0255469	0.0235341	0.0294691	0.0125443	0.0214357	0.0215769	0.0289595	0.0293783	0.0304751	0.0253733

## Sheet: Legend
Supplemental Table S3: Normalized and clustered editing levels
Editing levels were normalized across the entire time-course and clustered using an unsupervised hierarchical clustering approach.
The normalized editing levels are the underlying data for Figure 1B
Gene+editing site	an id for the particular editing site consisting of the gene name where the editing site is located and the genome annotation (chr+position, mm10)
nascent	time points for the nascent RNA
total	time points for the total RNA
