# Supplementary material for: RNA Pol II–dependent transcription efficiency fine-tunes A-to-I editing levels
Source: Genome Res. 2024 Feb;34(2):231–42. doi: 10.1101/gr.277686.123 (PMC10984384; doi:10.1101/gr.277686.123)
Supplement: Supplement 4 [file Supplemental_Table_S4.xlsx]

## Sheet: Main
id	chr	pos	str	ann	gene_name	ENS_id	EntrezID	labeled_0	labeled_0.17	labeled_0.33	labeled_0.5	labeled_1	labeled_1.5	labeled_2	labeled_4	labeled_8	labeled_12	labeled_16	total_0	total_0.17	total_0.33	total_0.5	total_1	total_1.5	total_2	total_4	total_8	total_12	total_16	MYC_TSSshare_0	MYC_TSSshare_0.17	MYC_TSSshare_0.33	MYC_TSSshare_0.5	MYC_TSSshare_2	MYC_TSSshare_4	RNAPII_TSS_0	RNAPII_TSS_0.17	RNAPII_TSS_0.33	RNAPII_TSS_0.5	RNAPII_TSS_2	RNAPII_TSS_4	RNAPII_GB_0	RNAPII_GB_0.17	RNAPII_GB_0.33	RNAPII_GB_0.5	RNAPII_GB_2	RNAPII_GB_4	RNAPII_TES_0	RNAPII_TES_0.17
chr10:110913191	chr10	110913191	+	Intron	Nap1l1	ENSMUSG00000058799	53605	NA	NA	NA	0.00387597	NA	0.00456621	0.00766284	0.00497512	NA	NA	0.00333333	NA	NA	NA	0.010101	NA	NA	NA	0.0128205	0.0277778	NA	0.0175439	3.73229	3.7111	3.82929	3.84406	3.52261	3.45712	6.28387	5.75586	4.84927	4.61969	6.32211	7.12689	2.76791	3.4102	3.30722	3.46069	3.59243	4.11068	5.23106	5.59219
chr10:127501833	chr10	127501833	+	Intron	Ptges3	ENSMUSG00000071072	56351	NA	NA	NA	0.0401361	0.0385093	0.018018	NA	0.055637	0.0196078	0.0119048	0.0277778	0.138889	NA	0.0779221	NA	NA	NA	NA	0.030303	0.0555556	0.0416667	NA	9.98731	9.23181	9.38292	10.2145	8.98688	8.52242	16.7457	18.9274	17.5033	16.7833	18.0995	17.1161	2.29001	3.31563	3.12873	3.41297	3.37494	3.49354	4.14452	4.69729
chr10:127507774	chr10	127507774	+	Intron	Ptges3	ENSMUSG00000071072	56351	NA	NA	0.0222222	0.0185185	0.025641	NA	NA	0.0272222	NA	0.015873	NA	NA	NA	0.0833333	0.333333	0.0666667	NA	0.148148	NA	NA	NA	0.15	9.98731	9.23181	9.38292	10.2145	8.98688	8.52242	16.7457	18.9274	17.5033	16.7833	18.0995	17.1161	2.29001	3.31563	3.12873	3.41297	3.37494	3.49354	4.14452	4.69729
chr10:127913245	chr10	127913245	+	Intron	Smarcc2	ENSMUSG00000025369	68094	0.00812769	0.0398358	0.0199432	0.0176578	0.0269209	0.0230919	0.0327957	0.013399	0.00938727	0.00946321	0.019712	0.0225397	NA	0.0114035	0.021739	0.00653595	0.0318416	NA	0.0175257	0.0325815	NA	0.0128205	0.832381	0.72267	0.627132	0.78593	0.708346	0.822233	0.94569	0.647974	1.10735	1.00039	0.47526	0.97234	1.04797	0.943916	0.811825	0.763009	0.69791	0.629288	13.1859	11.4229
chr10:20038308	chr10	20038308	+	Intron	Bclaf1	ENSMUSG00000037608	72567	NA	NA	NA	0.00574713	0.00537634	NA	NA	NA	NA	NA	NA	0.0208333	NA	NA	0.010101	NA	NA	0.0166667	NA	NA	0.0185185	NA	4.74687	4.34596	4.53224	4.62785	4.50279	4.43389	16.354	16.4005	13.1606	18.1685	16.0919	16.0609	1.77621	1.81618	1.83054	2.14656	1.9245	2.21306	5.28364	5.40288
chr10:27819408	chr10	27819408	+	Intron	Ptprk	ENSMUSG00000019889	19272	NA	NA	NA	0.0138889	0.0238095	NA	NA	0.0578704	NA	NA	0.0555556	NA	NA	0.0818182	NA	0.0555556	NA	NA	0.0416667	NA	0.0555556	0.130952	2.79592	2.92452	3.03489	2.89575	2.64358	2.99549	8.84097	8.11857	7.48797	7.8717	7.46599	8.62412	0.361634	0.399009	0.392763	0.417281	0.340221	0.343686	0.533621	0.664286
chr10:27819643	chr10	27819643	+	Intron	Ptprk	ENSMUSG00000019889	19272	NA	NA	0.127273	0.0821549	NA	NA	0.0333333	NA	0.0416667	NA	NA	NA	0.133333	0.0208333	NA	NA	0.0833333	NA	NA	0.25	NA	NA	2.79592	2.92452	3.03489	2.89575	2.64358	2.99549	8.84097	8.11857	7.48797	7.8717	7.46599	8.62412	0.361634	0.399009	0.392763	0.417281	0.340221	0.343686	0.533621	0.664286
chr10:27836020	chr10	27836020	+	Intron	Ptprk	ENSMUSG00000019889	19272	NA	NA	NA	NA	0.025641	NA	0.0666667	NA	0.0666667	NA	NA	NA	NA	0.111111	NA	NA	0.0666667	NA	0.0833333	0.166667	0.166667	0.333333	2.79592	2.92452	3.03489	2.89575	2.64358	2.99549	8.84097	8.11857	7.48797	7.8717	7.46599	8.62412	0.361634	0.399009	0.392763	0.417281	0.340221	0.343686	0.533621	0.664286
chr10:39520293	chr10	39520293	+	Intron	Rev3l	ENSMUSG00000019841	19714	NA	0.111111	NA	0.305556	NA	NA	NA	NA	NA	0.0555556	NA	NA	NA	NA	0.333333	0.111111	NA	NA	0.333333	NA	0.111111	NA	3.89222	3.22131	3.41115	3.94882	3.39315	3.1218	8.63287	8.3496	5.42649	6.76182	6.73802	6.09099	0.356392	0.296082	0.262631	0.3347	0.29156	0.32171	0.744075	0.813995
chr10:50458026	chr10	50458026	+	Intron	Ascc3	ENSMUSG00000038774	77987	0.0416667	0.115741	0.0208333	0.0222222	0.0654762	NA	0.0196078	0.030303	0.037037	NA	NA	NA	0.111111	NA	NA	NA	0.047619	0.178571	0.0555556	0.1	NA	NA	3.58203	3.53969	4.22383	3.79254	3.69569	2.99169	6.57375	7.60889	10.4653	8.99326	7.60467	8.5624	0.281743	0.281558	0.280066	0.356933	0.337339	0.35274	0.202912	0.21267
chr10:50459482	chr10	50459482	+	Intron	Ascc3	ENSMUSG00000038774	77987	NA	NA	0.037037	0.0460317	NA	0.0196078	0.0208333	0.0196078	0.037037	NA	NA	NA	NA	NA	NA	0.333333	0.222222	NA	NA	NA	NA	NA	3.58203	3.53969	4.22383	3.79254	3.69569	2.99169	6.57375	7.60889	10.4653	8.99326	7.60467	8.5624	0.281743	0.281558	0.280066	0.356933	0.337339	0.35274	0.202912	0.21267
chr10:80539394	chr10	80539394	+	Intron	Thop1	ENSMUSG00000004929	50492	NA	NA	NA	NA	NA	NA	NA	NA	NA	0.047619	0.0277778	NA	NA	NA	0.0208333	0.0175439	0.0416667	0.0666667	NA	NA	NA	NA	3.51764	4.19697	3.91283	4.16226	4.45291	4.01309	4.68518	9.73744	10.6093	12.4464	10.6939	11.3548	0.612807	1.13895	1.49694	1.6267	1.63325	1.64633	1.39633	2.30226
chr11:100898490	chr11	100898490	+	Intron	Atp6v0a1	ENSMUSG00000019302	11975	0.333333	0.333333	NA	NA	NA	NA	NA	0.333333	0.333333	0.166667	NA	NA	NA	0.333333	NA	0.333333	0.333333	0.333333	NA	NA	NA	NA	1.7879	1.40633	1.43901	1.22977	1.22817	0.933065	9.34797	7.65451	6.52658	7.58686	6.56201	7.57197	0.414721	0.315129	0.290817	0.223403	0.311405	0.312992	0.691609	0.671852
chr11:100898819	chr11	100898819	+	Intron	Atp6v0a1	ENSMUSG00000019302	11975	0.333333	0.111111	NA	NA	0.166667	0.333333	NA	NA	NA	NA	0.25	0.5	NA	NA	0.333333	NA	0.333333	NA	NA	NA	NA	NA	1.7879	1.40633	1.43901	1.22977	1.22817	0.933065	9.34797	7.65451	6.52658	7.58686	6.56201	7.57197	0.414721	0.315129	0.290817	0.223403	0.311405	0.312992	0.691609	0.671852
chr11:105109092	chr11	105109092	+	Intron	Tlk2	ENSMUSG00000020694	24086	NA	0.047619	0.0555556	NA	0.0833333	NA	NA	NA	NA	0.0944444	NA	0.0833333	0.0833333	NA	0.333333	NA	NA	NA	NA	NA	NA	NA	1.79033	1.37563	1.55688	1.821	1.62406	1.62251	1.98195	0.734125	1.16981	1.13176	1.36995	1.53706	0.851436	0.79178	0.735934	0.758729	0.74069	0.772681	1.18949	1.25436
chr11:105138122	chr11	105138122	+	UTR	Tlk2	ENSMUSG00000020694	24086	NA	NA	0.111111	NA	0.037037	NA	NA	NA	0.0416667	0.0769231	0.030303	NA	NA	NA	NA	NA	0.0666667	NA	0.047619	NA	NA	NA	1.79033	1.37563	1.55688	1.821	1.62406	1.62251	1.98195	0.734125	1.16981	1.13176	1.36995	1.53706	0.851436	0.79178	0.735934	0.758729	0.74069	0.772681	1.18949	1.25436
chr11:105977962	chr11	105977962	+	Intron	Map3k3	ENSMUSG00000020700	26406	NA	NA	0.0666667	0.0666667	NA	0.103704	0.111111	NA	NA	NA	NA	0.166667	0.333333	NA	NA	NA	NA	NA	NA	NA	NA	NA	3.15208	2.52125	2.61816	2.63454	2.52942	2.51755	4.15985	3.16484	4.02383	3.36356	3.48765	3.96598	0.625746	0.536897	0.466664	0.46551	0.482448	0.477422	4.12597	2.8927
chr11:115433185	chr11	115433185	+	Intron	Nup85	ENSMUSG00000020739	445007	0.025641	NA	NA	NA	NA	NA	0.0133333	NA	NA	NA	NA	NA	NA	NA	0.0166667	0.015873	NA	0.0175439	NA	NA	0.0208333	NA	5.58135	7.87294	7.36238	9.0152	7.41064	8.12711	7.31457	10.2249	10.5568	11.2724	10.5173	9.42588	0.906104	1.11487	1.22098	1.32709	1.34233	1.56265	3.21073	2.83307
chr11:117004343	chr11	117004343	+	Intron	Sec14l1	ENSMUSG00000020823	74136	NA	NA	NA	0.333333	NA	0.0833333	NA	0.666667	NA	NA	NA	0.333333	0.111111	0.333333	NA	0.666667	0.111111	0.333333	NA	NA	NA	NA	3.95201	3.25191	2.87966	3.13586	2.94733	3.03973	7.26198	6.15246	5.91139	4.45768	4.29589	4.6622	0.965728	0.766132	0.708664	0.569778	0.739209	0.663121	1.48519	1.44273
chr11:117523627	chr11	117523627	+	Intron	Tnrc6c	ENSMUSG00000025571	217351	0.0833333	0.030303	NA	NA	NA	NA	0.0416667	0.030303	0.0238095	0.0952381	NA	NA	NA	0.333333	NA	NA	0.047619	NA	NA	NA	NA	NA	3.24822	3.0214	2.93724	3.569	3.21386	3.00278	16.7905	14.423	16.2171	15.8032	15.476	15.5835	0.713879	0.609582	0.640338	0.605144	0.567381	0.624809	1.62892	1.35549
chr11:117523628	chr11	117523628	+	Intron	Tnrc6c	ENSMUSG00000025571	217351	0.0833333	0.030303	NA	0.0740741	NA	NA	0.0416667	0.166667	0.0238095	NA	0.0208333	NA	NA	NA	NA	NA	0.047619	NA	NA	NA	NA	NA	3.24822	3.0214	2.93724	3.569	3.21386	3.00278	16.7905	14.423	16.2171	15.8032	15.476	15.5835	0.713879	0.609582	0.640338	0.605144	0.567381	0.624809	1.62892	1.35549
chr11:117523640	chr11	117523640	+	Intron	Tnrc6c	ENSMUSG00000025571	217351	NA	0.111111	0.0606061	NA	NA	NA	0.0416667	0.0277778	0.0833333	0.103704	0.0196078	NA	NA	NA	NA	NA	NA	NA	NA	NA	NA	NA	3.24822	3.0214	2.93724	3.569	3.21386	3.00278	16.7905	14.423	16.2171	15.8032	15.476	15.5835	0.713879	0.609582	0.640338	0.605144	0.567381	0.624809	1.62892	1.35549
chr11:121152895	chr11	121152895	+	Intron	Foxk2	ENSMUSG00000039275	68837	NA	0.0208333	NA	NA	NA	NA	NA	0.0361552	0.0238095	0.0376984	0.0175439	0.0238095	0.0555556	NA	0.030303	NA	NA	0.0833333	0.030303	NA	NA	0.127273	1.88452	1.47074	1.57533	1.98037	1.82544	1.70735	3.92345	2.45298	2.41755	2.42959	2.78494	2.93383	1.15192	1.0721	1.12142	1.10392	1.28893	1.42234	0.551348	0.574492
chr11:121152896	chr11	121152896	+	Intron	Foxk2	ENSMUSG00000039275	68837	0.0185185	NA	NA	NA	NA	0.0185185	NA	0.0361552	NA	NA	NA	0.0238095	0.030303	NA	0.0606061	NA	NA	NA	0.030303	NA	NA	NA	1.88452	1.47074	1.57533	1.98037	1.82544	1.70735	3.92345	2.45298	2.41755	2.42959	2.78494	2.93383	1.15192	1.0721	1.12142	1.10392	1.28893	1.42234	0.551348	0.574492
chr11:121165225	chr11	121165225	+	Intron	Foxk2	ENSMUSG00000039275	68837	0.037037	NA	0.0846561	NA	0.0666667	NA	0.037037	0.037037	0.0666667	0.0666667	0.140741	0.166667	NA	NA	NA	NA	0.333333	0.111111	NA	NA	NA	NA	1.88452	1.47074	1.57533	1.98037	1.82544	1.70735	3.92345	2.45298	2.41755	2.42959	2.78494	2.93383	1.15192	1.0721	1.12142	1.10392	1.28893	1.42234	0.551348	0.574492
chr11:20464181	chr11	20464181	+	Intron	Sertad2	ENSMUSG00000049800	58172	0.047619	NA	NA	NA	0.0666667	NA	NA	NA	0.0833333	NA	0.0833333	NA	NA	NA	NA	0.111111	NA	NA	NA	0.25	0.333333	NA	3.96535	3.71911	3.79514	3.39108	3.42548	3.14844	8.91029	8.16983	7.92425	8.64468	7.19975	7.11875	0.602093	0.649485	0.662485	0.644023	0.473711	0.520359	1.30631	1.52597
chr11:23572222	chr11	23572222	+	Intron	Pus10	ENSMUSG00000020280	74467	0.0555556	0.0416667	0.0238095	0.047619	NA	0.0416667	0.0972222	0.15	0.17037	NA	0.103175	NA	0.111111	NA	NA	NA	NA	NA	NA	NA	NA	NA	3.9543	3.45338	3.44865	3.7925	3.11025	2.95829	13.5368	11.2349	11.338	11.1919	8.54162	11.8797	0.552195	0.483203	0.378625	0.305157	0.457342	0.484484	1.54317	1.28802
chr11:29090850	chr11	29090850	+	Intron	Ppp4r3b	ENSMUSG00000020463	104570	NA	NA	NA	NA	NA	NA	NA	NA	0.030303	0.025641	NA	NA	NA	0.111111	0.166667	0.0833333	NA	NA	0.0833333	NA	NA	NA	4.91022	4.58551	4.8454	5.47154	4.60171	5.27066	10.1281	8.10242	8.28992	7.92754	7.68492	8.13956	0.932729	0.747487	0.64532	0.703715	0.673435	0.823948	1.4216	1.49729
chr11:32361683	chr11	32361683	+	Intron	Ubtd2	ENSMUSG00000044949	327900	NA	NA	0.00877193	0.00833333	NA	0.0246914	0.0185185	NA	NA	NA	NA	NA	NA	NA	0.0277778	0.030303	0.0196078	NA	NA	NA	NA	NA	5.0511	3.87723	4.33858	4.29071	3.92371	3.56849	7.77209	8.2576	6.92536	7.12727	6.98935	6.67119	1.02719	0.982319	1.01687	1.11289	0.815952	0.948098	1.40548	1.25776
chr11:32365059	chr11	32365059	+	Intron	Ubtd2	ENSMUSG00000044949	327900	0.00833333	0.0166667	NA	NA	0.00952381	0.0588235	NA	0.0246416	NA	NA	NA	0.0238095	NA	0.0133333	0.0868347	NA	NA	0.0525253	0.0238095	NA	0.0333333	0.0416667	5.0511	3.87723	4.33858	4.29071	3.92371	3.56849	7.77209	8.2576	6.92536	7.12727	6.98935	6.67119	1.02719	0.982319	1.01687	1.11289	0.815952	0.948098	1.40548	1.25776
chr11:32372853	chr11	32372853	+	Intron	Ubtd2	ENSMUSG00000044949	327900	NA	NA	NA	0.0290404	0.0166667	NA	NA	0.0266667	NA	NA	0.0208333	0.0208333	0.0416667	NA	NA	NA	NA	NA	NA	NA	0.0555556	0.180952	5.0511	3.87723	4.33858	4.29071	3.92371	3.56849	7.77209	8.2576	6.92536	7.12727	6.98935	6.67119	1.02719	0.982319	1.01687	1.11289	0.815952	0.948098	1.40548	1.25776
chr11:32373015	chr11	32373015	+	Intron	Ubtd2	ENSMUSG00000044949	327900	NA	0.00980392	NA	NA	NA	0.0196078	0.015873	NA	NA	NA	NA	NA	NA	NA	NA	0.0416667	NA	0.037037	NA	NA	0.0318182	NA	5.0511	3.87723	4.33858	4.29071	3.92371	3.56849	7.77209	8.2576	6.92536	7.12727	6.98935	6.67119	1.02719	0.982319	1.01687	1.11289	0.815952	0.948098	1.40548	1.25776
chr11:32377264	chr11	32377264	+	Intron	Ubtd2	ENSMUSG00000044949	327900	NA	NA	0.0133333	0.0185185	NA	NA	NA	0.0238095	NA	NA	0.030303	0.047619	NA	NA	0.0222222	NA	0.0416667	NA	NA	NA	NA	NA	5.0511	3.87723	4.33858	4.29071	3.92371	3.56849	7.77209	8.2576	6.92536	7.12727	6.98935	6.67119	1.02719	0.982319	1.01687	1.11289	0.815952	0.948098	1.40548	1.25776
chr11:32392185	chr11	32392185	+	Intron	Ubtd2	ENSMUSG00000044949	327900	NA	NA	0.030303	0.037037	NA	NA	0.0277778	0.0787037	NA	NA	0.111111	0.111111	NA	0.5	0.222222	0.111111	NA	NA	0.0833333	NA	NA	0.111111	5.0511	3.87723	4.33858	4.29071	3.92371	3.56849	7.77209	8.2576	6.92536	7.12727	6.98935	6.67119	1.02719	0.982319	1.01687	1.11289	0.815952	0.948098	1.40548	1.25776
chr11:43497647	chr11	43497647	+	UTR	Pwwp2a	ENSMUSG00000044950	70802	0.047619	0.0701754	NA	0.00813008	NA	0.0138889	0.00877193	0.0203963	NA	0.0262897	0.0352137	NA	NA	NA	NA	NA	NA	0.047619	NA	0.0357143	NA	0.0652778	1.78304	1.31536	1.38138	1.7199	1.48963	1.58515	4.5627	3.85039	3.99446	2.02947	2.51553	4.24045	0.747761	0.716274	0.816558	0.79546	0.872404	0.973228	1.07134	1.30367
chr11:43507197	chr11	43507197	+	Intron	Pwwp2a	ENSMUSG00000044950	70802	NA	NA	NA	0.0883191	NA	NA	0.0625	NA	0.030303	0.0208333	0.0238095	NA	NA	0.0833333	NA	NA	NA	NA	NA	NA	NA	NA	1.78304	1.31536	1.38138	1.7199	1.48963	1.58515	4.5627	3.85039	3.99446	2.02947	2.51553	4.24045	0.747761	0.716274	0.816558	0.79546	0.872404	0.973228	1.07134	1.30367
chr11:45679028	chr11	45679028	+	Intron	Clint1	ENSMUSG00000006169	216705	NA	NA	0.0549944	NA	NA	NA	NA	0.0123457	0.0185185	0.0144928	NA	NA	NA	NA	NA	0.0666667	NA	NA	NA	NA	NA	0.166667	2.7857	2.99415	3.38432	4.0248	3.86102	3.29892	2.79056	3.94957	2.9657	3.214	1.92383	4.53624	0.8751	0.973288	1.20438	1.38346	1.18103	1.20006	1.42035	1.45637
chr11:45679034	chr11	45679034	+	Intron	Clint1	ENSMUSG00000006169	216705	NA	NA	NA	NA	0.023752	NA	NA	0.0119048	NA	NA	0.0104167	NA	NA	NA	0.037037	0.0666667	NA	NA	NA	NA	0.15	NA	2.7857	2.99415	3.38432	4.0248	3.86102	3.29892	2.79056	3.94957	2.9657	3.214	1.92383	4.53624	0.8751	0.973288	1.20438	1.38346	1.18103	1.20006	1.42035	1.45637
chr11:53186917	chr11	53186917	+	Exon	Aff4	ENSMUSG00000049470	93736	NA	NA	NA	NA	NA	0.00854701	NA	0.0357143	0.00877193	NA	0.0133333	NA	0.0333333	NA	0.025641	NA	NA	NA	NA	NA	0.030303	NA	2.03296	1.41039	1.882	1.75189	1.47372	1.87626	9.11086	9.02674	4.35887	7.74166	6.98866	8.39552	1.10564	0.982632	0.951543	0.917236	0.817978	0.831836	3.08485	2.92998
chr11:53211267	chr11	53211267	+	Intron	Aff4	ENSMUSG00000049470	93736	NA	0.047619	0.0952381	NA	0.037037	NA	NA	NA	NA	0.037037	0.0923077	NA	NA	NA	NA	NA	NA	NA	0.166667	NA	NA	NA	2.03296	1.41039	1.882	1.75189	1.47372	1.87626	9.11086	9.02674	4.35887	7.74166	6.98866	8.39552	1.10564	0.982632	0.951543	0.917236	0.817978	0.831836	3.08485	2.92998
chr11:60608763	chr11	60608763	+	Intron	Shmt1	ENSMUSG00000020534	20425	NA	NA	0.0196078	0.0138889	NA	NA	NA	NA	NA	0.0277778	NA	NA	NA	0.047619	NA	0.030303	NA	NA	0.0222222	0.0833333	NA	NA	6.38639	5.57353	5.95306	5.44875	5.52582	5.14107	3.44979	6.04213	7.10836	5.70322	6.9425	6.95502	0.482577	0.894841	1.03339	1.07091	0.766239	0.754176	1.62729	2.09631
chr11:61972629	chr11	61972629	+	Intron	Specc1	ENSMUSG00000042331	432572	0.047619	NA	NA	0.037037	NA	NA	NA	0.0555556	NA	0.0416667	0.133333	0.0833333	NA	0.0833333	NA	0.333333	NA	NA	NA	NA	NA	NA	1.05709	0.914333	0.644683	0.718175	0.808818	0.946558	0.505034	0.5635	0.584447	0.701439	0.202056	0.732117	0.576728	0.627111	0.572956	0.605911	0.496407	0.537113	1.48033	1.88448
chr11:69845577	chr11	69845577	+	Intron	Dlg4	ENSMUSG00000020886	13385	0.111111	NA	NA	NA	NA	0.0666667	0.0666667	NA	NA	NA	0.0444444	0.0666667	NA	NA	0.0753968	0.0892857	0.103175	NA	NA	NA	0.111111	NA	1.09516	1.73558	1.50627	1.94027	1.4511	2.12888	1.51088	1.92185	1.55071	1.97926	2.04163	1.83295	0.710728	0.616314	0.683345	0.643906	0.862292	0.80734	1.01574	1.14949
chr11:69845626	chr11	69845626	+	Intron	Dlg4	ENSMUSG00000020886	13385	NA	NA	NA	0.0833333	NA	0.0666667	NA	NA	NA	0.0666667	0.0333333	NA	NA	NA	0.0833333	NA	0.0666667	0.0833333	NA	NA	NA	NA	1.09516	1.73558	1.50627	1.94027	1.4511	2.12888	1.51088	1.92185	1.55071	1.97926	2.04163	1.83295	0.710728	0.616314	0.683345	0.643906	0.862292	0.80734	1.01574	1.14949
chr11:69846165	chr11	69846165	+	Intron	Dlg4	ENSMUSG00000020886	13385	NA	NA	0.166667	NA	0.0416667	0.0196078	0.0583333	NA	NA	NA	NA	0.130952	NA	NA	NA	0.142857	NA	NA	0.0333333	NA	0.0185185	0.0793651	1.09516	1.73558	1.50627	1.94027	1.4511	2.12888	1.51088	1.92185	1.55071	1.97926	2.04163	1.83295	0.710728	0.616314	0.683345	0.643906	0.862292	0.80734	1.01574	1.14949
chr11:69846166	chr11	69846166	+	Intron	Dlg4	ENSMUSG00000020886	13385	0.0277778	0.0277778	0.148148	NA	0.0601852	0.0196078	0.0166667	0.0606061	NA	NA	NA	0.130952	0.171717	NA	NA	0.142857	NA	0.0545809	0.0666667	NA	0.0196078	0.0862471	1.09516	1.73558	1.50627	1.94027	1.4511	2.12888	1.51088	1.92185	1.55071	1.97926	2.04163	1.83295	0.710728	0.616314	0.683345	0.643906	0.862292	0.80734	1.01574	1.14949
chr11:69846597	chr11	69846597	+	Intron	Dlg4	ENSMUSG00000020886	13385	NA	NA	0.0833333	NA	0.0416667	0.0416667	NA	0.025641	0.010101	NA	0.0277778	NA	0.0138889	0.0833333	NA	0.15	0.138889	NA	0.0119048	NA	0.144444	0.0740741	1.09516	1.73558	1.50627	1.94027	1.4511	2.12888	1.51088	1.92185	1.55071	1.97926	2.04163	1.83295	0.710728	0.616314	0.683345	0.643906	0.862292	0.80734	1.01574	1.14949
chr11:69846641	chr11	69846641	+	Intron	Dlg4	ENSMUSG00000020886	13385	NA	NA	NA	NA	0.047619	NA	0.15	0.0238095	0.0333333	0.0833333	0.047619	0.166667	NA	NA	NA	0.122222	NA	NA	0.047619	NA	0.0277778	0.030303	1.09516	1.73558	1.50627	1.94027	1.4511	2.12888	1.51088	1.92185	1.55071	1.97926	2.04163	1.83295	0.710728	0.616314	0.683345	0.643906	0.862292	0.80734	1.01574	1.14949
chr11:69848486	chr11	69848486	+	Intron	Dlg4	ENSMUSG00000020886	13385	NA	NA	NA	NA	NA	NA	0.15	0.037037	NA	NA	0.15	NA	NA	0.0666667	0.177778	NA	0.388889	NA	0.0666667	NA	NA	NA	1.09516	1.73558	1.50627	1.94027	1.4511	2.12888	1.51088	1.92185	1.55071	1.97926	2.04163	1.83295	0.710728	0.616314	0.683345	0.643906	0.862292	0.80734	1.01574	1.14949
chr11:69848500	chr11	69848500	+	Intron	Dlg4	ENSMUSG00000020886	13385	NA	NA	0.047619	NA	0.0666667	0.122222	0.0666667	0.037037	0.0666667	0.0555556	0.0809524	NA	NA	NA	0.111111	0.111111	NA	NA	0.130952	0.166667	0.1	0.125	1.09516	1.73558	1.50627	1.94027	1.4511	2.12888	1.51088	1.92185	1.55071	1.97926	2.04163	1.83295	0.710728	0.616314	0.683345	0.643906	0.862292	0.80734	1.01574	1.14949
chr11:69850545	chr11	69850545	+	Intron	Dlg4	ENSMUSG00000020886	13385	NA	NA	0.0555556	NA	0.0833333	0.111111	0.0833333	0.0833333	0.111111	0.047619	NA	NA	NA	0.111111	0.0555556	0.111111	0.222222	0.333333	NA	NA	0.133333	0.375	1.09516	1.73558	1.50627	1.94027	1.4511	2.12888	1.51088	1.92185	1.55071	1.97926	2.04163	1.83295	0.710728	0.616314	0.683345	0.643906	0.862292	0.80734	1.01574	1.14949
chr11:70672616	chr11	70672616	+	Intron	Rabep1	ENSMUSG00000020817	54189	0.0175439	0.0512821	0.0333333	0.0333333	0.031746	NA	NA	0.0694444	0.0452489	NA	0.0114943	NA	NA	NA	NA	NA	0.0833333	NA	NA	NA	NA	NA	2.84432	2.7503	2.60417	2.62174	2.46765	2.45666	6.09853	7.71878	6.78298	7.07143	5.22683	6.11544	0.692126	0.756779	0.75797	0.887422	0.898659	0.98016	2.12482	1.95329
chr11:70672681	chr11	70672681	+	Intron	Rabep1	ENSMUSG00000020817	54189	NA	NA	0.0175439	0.0353078	0.0436364	0.0480331	0.0595238	0.0436508	0.063172	0.0371517	0.0892857	NA	0.166667	NA	0.0666667	NA	0.0833333	0.0833333	NA	NA	NA	NA	2.84432	2.7503	2.60417	2.62174	2.46765	2.45666	6.09853	7.71878	6.78298	7.07143	5.22683	6.11544	0.692126	0.756779	0.75797	0.887422	0.898659	0.98016	2.12482	1.95329
chr11:75497235	chr11	75497235	+	Intron	Crk	ENSMUSG00000017776	12928	NA	NA	NA	0.0138889	NA	0.0238095	NA	NA	NA	0.0166667	NA	NA	NA	NA	NA	0.037037	0.0416667	NA	NA	NA	0.0666667	0.037037	2.22698	2.26441	2.52406	2.31947	2.52094	1.99205	12.3471	11.6014	8.65864	11.4357	10.0429	10.613	1.61914	1.81777	1.80274	1.88064	1.47637	1.70834	2.64304	2.67215
chr11:75504801	chr11	75504801	+	Intron	Crk	ENSMUSG00000017776	12928	NA	0.0238095	NA	NA	NA	0.0123457	0.0208333	NA	NA	NA	NA	NA	0.122222	NA	0.037037	NA	NA	NA	NA	NA	NA	0.047619	2.22698	2.26441	2.52406	2.31947	2.52094	1.99205	12.3471	11.6014	8.65864	11.4357	10.0429	10.613	1.61914	1.81777	1.80274	1.88064	1.47637	1.70834	2.64304	2.67215
chr11:75512827	chr11	75512827	+	Intron	Crk	ENSMUSG00000017776	12928	0.0222222	0.0175439	0.037037	NA	NA	0.0222222	NA	0.00813008	NA	NA	NA	0.130952	NA	0.0666667	NA	NA	0.037037	NA	NA	NA	NA	0.0416667	2.22698	2.26441	2.52406	2.31947	2.52094	1.99205	12.3471	11.6014	8.65864	11.4357	10.0429	10.613	1.61914	1.81777	1.80274	1.88064	1.47637	1.70834	2.64304	2.67215
chr11:75514421	chr11	75514421	+	Intron	Crk	ENSMUSG00000017776	12928	NA	NA	NA	NA	0.0583333	NA	NA	NA	NA	0.030303	0.0196078	NA	NA	0.0416667	0.333333	0.111111	NA	0.0666667	0.037037	NA	NA	0.166667	2.22698	2.26441	2.52406	2.31947	2.52094	1.99205	12.3471	11.6014	8.65864	11.4357	10.0429	10.613	1.61914	1.81777	1.80274	1.88064	1.47637	1.70834	2.64304	2.67215
chr11:75518799	chr11	75518799	+	UTR	Crk	ENSMUSG00000017776	12928	NA	NA	NA	NA	NA	NA	NA	NA	NA	NA	NA	NA	NA	0.00574713	NA	0.0018018	0.00537517	NA	0.0033087	NA	0.00469484	0.00225225	2.22698	2.26441	2.52406	2.31947	2.52094	1.99205	12.3471	11.6014	8.65864	11.4357	10.0429	10.613	1.61914	1.81777	1.80274	1.88064	1.47637	1.70834	2.64304	2.67215
chr11:76766337	chr11	76766337	+	Intron	Blmh	ENSMUSG00000020840	104184	0.0555556	0.0833333	NA	0.0666667	NA	NA	0.0238095	0.0952381	NA	NA	0.0277778	NA	NA	NA	NA	NA	NA	NA	0.111111	NA	0.222222	NA	1.04055	1.30447	1.59462	1.54616	1.56909	1.93831	4.0533	4.81629	4.63927	4.04176	4.90307	4.89333	0.485989	0.439923	0.47866	0.529747	0.619595	0.586275	0.541031	0.65546
chr11:77823760	chr11	77823760	+	Intron	Phf12	ENSMUSG00000037791	268448	NA	0.047619	NA	0.116667	NA	NA	NA	0.0555556	NA	NA	0.0416667	NA	NA	0.0555556	0.111111	0.037037	0.0833333	NA	NA	0.1	NA	NA	4.90324	4.22728	3.79915	4.27835	4.04326	4.43263	9.13393	5.70739	5.20685	6.08773	6.52038	7.36623	1.33466	1.15588	1.02827	0.946706	1.2953	1.44239	3.7216	4.15445
chr11:77825473	chr11	77825473	+	Intron	Phf12	ENSMUSG00000037791	268448	NA	NA	NA	NA	0.025641	NA	NA	NA	0.0555556	NA	0.103175	NA	NA	NA	0.111111	NA	0.166667	NA	0.111111	NA	NA	NA	4.90324	4.22728	3.79915	4.27835	4.04326	4.43263	9.13393	5.70739	5.20685	6.08773	6.52038	7.36623	1.33466	1.15588	1.02827	0.946706	1.2953	1.44239	3.7216	4.15445
chr11:79155979	chr11	79155979	+	Intron	Nf1	ENSMUSG00000020716	18015	0.0289855	0.0461538	0.0944444	0.037037	0.025641	0.0222222	0.0606061	0.0133333	0.0784314	0.0541126	NA	0.166667	NA	NA	NA	NA	NA	NA	0.111111	NA	NA	NA	1.13176	1.40064	1.04587	1.26137	1.54912	1.52413	2.94594	1.6791	1.50927	1.85736	1.37494	1.80093	0.592273	0.576298	0.54917	0.571729	0.414202	0.452954	0.964354	1.15543
chr11:79933958	chr11	79933958	+	Intron	Atad5	ENSMUSG00000017550	237877	0.111111	0.366667	NA	NA	NA	0.037037	NA	0.047619	0.0416667	0.114286	0.0694444	0.5	NA	0.333333	0.111111	NA	NA	NA	NA	NA	NA	NA	1.83888	1.31249	1.18968	1.57901	1.26327	1.43538	5.25882	3.09503	3.44911	3.47329	2.74524	4.99104	0.452605	0.268681	0.188163	0.274305	0.319441	0.576064	1.4416	0.907722
chr11:83996346	chr11	83996346	+	Intron	Acaca	ENSMUSG00000020532	107476	0.0222222	NA	NA	0.0395299	0.0196078	0.0404762	NA	NA	0.0333333	NA	0.037037	NA	NA	NA	NA	NA	NA	NA	NA	NA	NA	NA	2.78664	3.00438	3.7238	3.57151	3.42223	3.43136	4.07488	3.0056	3.12658	4.40809	3.31413	4.32851	0.467263	0.529258	0.509939	0.591988	0.717689	0.722941	1.235	1.07851
chr11:84179196	chr11	84179196	+	Intron	Acaca	ENSMUSG00000020532	107476	NA	NA	0.114286	0.191414	0.0740741	0.0923077	0.030303	NA	NA	NA	NA	NA	NA	0.194444	0.0416667	NA	NA	0.111111	NA	NA	NA	NA	2.78664	3.00438	3.7238	3.57151	3.42223	3.43136	4.07488	3.0056	3.12658	4.40809	3.31413	4.32851	0.467263	0.529258	0.509939	0.591988	0.717689	0.722941	1.235	1.07851
chr11:86978224	chr11	86978224	+	Intron	Trim37	ENSMUSG00000018548	68729	NA	NA	NA	NA	NA	0.0555556	0.166667	NA	NA	0.0833333	NA	NA	NA	0.333333	NA	0.333333	0.111111	NA	NA	NA	NA	NA	3.1812	3.071	2.98056	3.47887	3.53831	3.38676	6.07498	5.19709	6.58875	6.14751	4.14921	4.77933	0.314703	0.307597	0.270868	0.373002	0.419859	0.462468	0.232908	0.322472
chr12:17436404	chr12	17436404	+	UTR	Nol10	ENSMUSG00000061458	217431	0.00495135	0.0147537	0.0155065	0.0121494	0.00841948	0.0103209	0.0144753	0.00909552	0.0085596	0.00708499	0.0133553	0.0139172	0.011985	0.0156325	0.00741562	0.0120673	0.0148927	0.00664086	0.00152905	0.00308642	0.00929207	0.0145169	2.42862	2.38696	2.10147	2.23441	2.45389	2.27218	5.32626	6.91348	5.41541	6.85815	5.36469	6.34493	0.506521	0.648607	0.660691	0.751465	0.668285	0.710911	0.341474	0.494935
chr12:17436414	chr12	17436414	+	UTR	Nol10	ENSMUSG00000061458	217431	0.0151106	0.0358627	0.0287096	0.0230032	0.0275507	0.028734	0.0402458	0.0238216	0.030785	0.0247956	0.0446269	0.0138129	0.031606	0.0136774	0.0212236	0.021558	0.0346673	0.0237408	0.00811867	0.0118397	0.0119881	0.0144501	2.42862	2.38696	2.10147	2.23441	2.45389	2.27218	5.32626	6.91348	5.41541	6.85815	5.36469	6.34493	0.506521	0.648607	0.660691	0.751465	0.668285	0.710911	0.341474	0.494935
chr12:17436466	chr12	17436466	+	UTR	Nol10	ENSMUSG00000061458	217431	0.0219489	0.0364347	0.0444273	0.045833	0.0385041	0.0376119	0.0458301	0.0452992	0.0463664	0.0426562	0.0450624	0.0194829	0.0215752	0.0265774	0.0282962	0.0265628	0.0233805	0.0196643	0.0256346	0.0216841	0.0245239	0.0217506	2.42862	2.38696	2.10147	2.23441	2.45389	2.27218	5.32626	6.91348	5.41541	6.85815	5.36469	6.34493	0.506521	0.648607	0.660691	0.751465	0.668285	0.710911	0.341474	0.494935
chr12:17436472	chr12	17436472	+	UTR	Nol10	ENSMUSG00000061458	217431	0.0281022	0.0359393	0.0371991	0.0452975	0.0399466	0.0375799	0.0396917	0.0409265	0.0411646	0.0372898	0.045605	0.0226614	0.016574	0.0300617	0.0206739	0.0160542	0.0174446	0.019859	0.0173668	0.0145275	0.015695	0.0155852	2.42862	2.38696	2.10147	2.23441	2.45389	2.27218	5.32626	6.91348	5.41541	6.85815	5.36469	6.34493	0.506521	0.648607	0.660691	0.751465	0.668285	0.710911	0.341474	0.494935
chr12:17436477	chr12	17436477	+	UTR	Nol10	ENSMUSG00000061458	217431	0.023632	0.0316714	0.0378545	0.0350492	0.0319874	0.0295196	0.0398766	0.0350859	0.0401436	0.0262144	0.0355528	0.0121382	0.0183002	0.0257852	0.0227808	0.0163813	0.0201011	0.013209	0.0169834	0.014797	0.0106062	0.0177403	2.42862	2.38696	2.10147	2.23441	2.45389	2.27218	5.32626	6.91348	5.41541	6.85815	5.36469	6.34493	0.506521	0.648607	0.660691	0.751465	0.668285	0.710911	0.341474	0.494935
chr12:17436481	chr12	17436481	+	UTR	Nol10	ENSMUSG00000061458	217431	0.0244959	0.0325844	0.0360607	0.0417171	0.0313572	0.0353712	0.0304799	0.0387406	0.0418908	0.038153	0.0366269	0.0126175	0.0287388	0.0269804	0.0301709	0.0143511	0.0172069	0.0234642	0.0161383	0.0186603	0.0119048	0.0117915	2.42862	2.38696	2.10147	2.23441	2.45389	2.27218	5.32626	6.91348	5.41541	6.85815	5.36469	6.34493	0.506521	0.648607	0.660691	0.751465	0.668285	0.710911	0.341474	0.494935
chr12:17436491	chr12	17436491	+	UTR	Nol10	ENSMUSG00000061458	217431	0.0332921	0.0393	0.0673788	0.0698142	0.063975	0.0688839	0.0622707	0.0572834	0.0856726	0.0550011	0.0530082	0.0424431	0.0664422	0.0343226	0.0300477	0.0270833	0.0532999	0.0293047	0.0639179	0.0517429	0.0102954	0.0423015	2.42862	2.38696	2.10147	2.23441	2.45389	2.27218	5.32626	6.91348	5.41541	6.85815	5.36469	6.34493	0.506521	0.648607	0.660691	0.751465	0.668285	0.710911	0.341474	0.494935
chr12:29341790	chr12	29341790	+	Intron	Rnaseh1	ENSMUSG00000020630	19819	NA	0.0833333	NA	0.030303	NA	NA	NA	0.047619	NA	0.0333333	0.047619	NA	NA	NA	NA	NA	NA	0.111111	NA	NA	NA	NA	2.75523	3.76003	3.69838	4.02288	4.12512	3.58752	6.68469	7.75647	7.76811	7.97486	6.71243	7.08978	0.450161	0.730938	0.876051	0.830899	0.840296	0.891925	0.43682	0.50015
chr12:33652612	chr12	33652612	+	Exon	Sypl	ENSMUSG00000020570	19027	NA	NA	NA	0.037037	0.030303	NA	NA	0.0196078	0.0333333	0.037037	NA	0.218182	0.166667	0.0779221	0.163889	NA	0.0666667	0.0833333	0.166667	0.166667	0.0666667	NA	2.09795	1.57027	1.78985	1.71064	2.05317	1.76443	4.08523	3.35695	4.75119	4.48119	3.06562	2.96739	0.419294	0.472907	0.455153	0.506379	0.328787	0.354815	0.698419	0.759647
chr12:34123590	chr12	34123590	+	UTR	Twistnb	ENSMUSG00000020561	28071	NA	NA	NA	0.0128205	NA	NA	NA	NA	NA	0.0138889	NA	0.0047619	NA	0.00378788	0.003663	0.00456621	NA	NA	NA	NA	NA	NA	3.87935	2.39957	3.33788	3.19406	3.12269	2.82901	3.46257	4.56232	7.19343	6.16655	4.62381	3.99617	0.536153	0.662872	0.634159	0.693565	0.666186	0.775727	1.25321	1.08492
chr12:66101578	chr12	66101578	+	Intron	Togaram1	ENSMUSG00000035614	328108	0.0666667	NA	0.037037	0.166667	0.037037	NA	NA	NA	NA	NA	0.0909091	NA	NA	NA	NA	NA	0.111111	0.166667	0.166667	NA	NA	NA	2.25996	1.88774	1.42812	2.14219	2.1774	1.91852	6.27565	5.66766	6.01804	6.33228	5.33862	5.47462	0.367358	0.296665	0.251621	0.297197	0.303864	0.368071	0.632466	0.50643
chr12:66145500	chr12	66145500	+	Intron	Prpf39	ENSMUSG00000035597	328110	0.0144928	NA	0.0286169	NA	0.0123457	0.0196078	0.010101	NA	NA	0.0222222	0.0357143	NA	0.111111	NA	0.0289855	NA	0.030303	0.0833333	0.0846561	0.1	NA	0.030303	1.82679	2.35717	2.24902	2.67464	2.40832	2.54309	4.76982	6.96009	4.80312	5.92804	6.438	6.64901	0.975416	1.15075	1.21629	1.52111	1.41679	1.48915	1.92818	2.33074
chr12:79978378	chr12	79978378	+	Intron	Eif2s1	ENSMUSG00000021116	13665	0.0666667	NA	NA	0.0128205	NA	NA	NA	0.0196078	0.0138889	0.0175439	NA	0.030303	NA	0.0666667	NA	NA	NA	NA	NA	NA	NA	NA	6.82523	7.72601	7.77024	7.82535	7.76785	6.50747	6.42168	9.98737	10.1101	10.1574	9.87078	9.10777	0.90193	1.27	1.36454	1.59865	1.61973	1.44995	2.07959	2.31144
chr12:8235841	chr12	8235841	+	Intron	Ldah	ENSMUSG00000037669	68832	NA	0.200397	0.047619	NA	NA	0.133333	NA	0.047619	0.0666667	0.0416667	0.047619	NA	NA	NA	0.111111	NA	NA	NA	NA	NA	NA	0.333333	1.82542	2.88626	2.64232	3.73092	3.00401	3.04953	4.08534	3.80164	5.65737	5.23694	6.53361	5.56473	0.240243	0.199712	0.195023	0.196424	0.255675	0.262867	0.469494	0.292366
chr12:8254093	chr12	8254093	+	Intron	Ldah	ENSMUSG00000037669	68832	NA	0.166667	0.333333	NA	0.166667	0.166667	0.0858586	0.0416667	0.0833333	NA	0.0833333	NA	0.111111	NA	NA	0.333333	NA	NA	NA	NA	0.111111	NA	1.82542	2.88626	2.64232	3.73092	3.00401	3.04953	4.08534	3.80164	5.65737	5.23694	6.53361	5.56473	0.240243	0.199712	0.195023	0.196424	0.255675	0.262867	0.469494	0.292366
chr12:83035741	chr12	83035741	+	Intron	Pcnx	ENSMUSG00000021140	54604	NA	0.111111	0.0666667	0.0666667	0.0666667	NA	NA	NA	NA	NA	NA	NA	NA	NA	0.0666667	0.333333	NA	NA	NA	NA	NA	NA	0.762721	0.535189	0.707297	1.19492	0.660652	0.751735	0.647485	0.94405	0.755858	0.843234	0.974293	0.830623	0.200519	0.171732	0.190094	0.189246	0.219094	0.213	0.336449	0.449288
chr13:113295317	chr13	113295317	+	UTR	Il6st	ENSMUSG00000021756	16195	NA	0.00520833	NA	NA	NA	NA	NA	NA	NA	NA	NA	0.00193798	0.00363621	0.00202406	NA	0.00235614	0.00121212	NA	0.00117371	NA	NA	0.00134409	2.93584	3.03495	2.76024	3.28854	2.808	2.94589	10.5366	12.6255	12.0743	12.2089	10.328	11.8125	1.51192	1.5326	1.41413	1.40858	1.67162	1.4842	2.39126	2.29161
chr13:34989936	chr13	34989936	+	Intron	Prpf4b	ENSMUSG00000021413	19134	0.0333333	NA	0.0373737	NA	0.0175439	0.037037	NA	NA	0.025641	NA	0.0114943	0.0416667	NA	0.0222222	NA	0.047619	0.0833333	0.125	NA	NA	0.108333	NA	4.80445	4.45351	4.65062	4.38879	4.82621	4.24782	10.0146	10.5812	11.1348	11.3927	10.1049	9.46593	1.00697	1.26502	1.34536	1.46745	1.43341	1.57949	1.89596	2.39938
chr13:35850482	chr13	35850482	+	Intron	Cdyl	ENSMUSG00000059288	12593	NA	NA	NA	NA	NA	NA	NA	NA	0.0833333	0.0555556	NA	NA	NA	NA	0.166667	0.416667	NA	0.111111	NA	NA	NA	0.333333	0.457842	0.410261	0.26597	0.45665	0.261307	0.11453	0.0802378	0.0802378	0.0802378	0.114472	0.0802378	0.11651	0.198551	0.258231	0.25714	0.263101	0.301491	0.308339	0.571568	0.664842
chr13:55213929	chr13	55213929	+	Intron	Zfp346	ENSMUSG00000021481	26919	NA	NA	NA	0.0809524	NA	0.047619	0.0666667	0.047619	NA	NA	NA	NA	NA	NA	0.0925926	NA	NA	0.166667	0.0833333	0.0833333	NA	NA	2.22935	2.3465	2.26964	2.58324	2.22985	2.14404	7.2819	9.5355	8.40107	9.4715	7.10759	7.6577	0.623244	0.652185	0.730999	0.784395	0.806205	0.848712	1.19983	1.03325
chr13:69765173	chr13	69765173	+	Intron	Nsun2	ENSMUSG00000021595	28114	0.0175439	0.0166667	0.00980392	0.0323232	NA	0.0144928	NA	NA	0.00813008	0.00877193	0.0230621	NA	0.0976431	NA	0.0208333	0.0166667	NA	0.015873	0.0541667	0.153409	0.0277778	0.0826331	9.675	11.3547	10.6398	11.5823	9.73422	12.0042	6.4602	5.63094	8.11552	8.03209	8.14067	6.82576	1.23952	1.4713	1.86334	2.01126	2.04868	2.13055	1.72802	1.91553
chr13:74783366	chr13	74783366	+	Intron	Erap1	ENSMUSG00000021583	80898	NA	0.333333	NA	0.111111	NA	NA	NA	NA	NA	0.166667	0.0833333	0.333333	0.166667	0.333333	0.166667	NA	NA	0.333333	0.333333	NA	0.333333	NA	4.55065	4.76998	4.54841	4.17052	4.64346	4.00818	7.70555	10.9395	9.80487	9.41679	7.14104	8.56932	0.115295	0.148427	0.139464	0.15003	0.10983	0.103448	0.429864	0.312698
chr14:121314626	chr14	121314626	+	Intron	Ipo5	ENSMUSG00000030662	70572	NA	0.0416667	NA	0.0238095	0.037037	NA	NA	0.0196078	NA	0.1	NA	NA	NA	0.015873	NA	NA	NA	NA	NA	NA	NA	NA	1.97955	2.5419	2.55617	2.57165	2.78734	2.45928	1.29978	2.00018	2.27892	3.26312	2.1498	2.41002	0.993275	1.53136	1.91277	2.08419	1.68951	1.80815	2.23097	2.1865
chr14:21176493	chr14	21176493	+	Intron	Fam149b	ENSMUSG00000039599	105428	NA	NA	NA	0.333333	NA	0.0833333	0.166667	0.333333	0.111111	NA	NA	0.333333	NA	NA	NA	0.0666667	NA	0.333333	NA	NA	NA	NA	3.20416	5.04384	4.10671	5.40559	4.55951	5.32132	8.56811	7.56109	7.40178	8.27654	6.04396	7.6185	0.535689	0.377471	0.323986	0.285989	0.401783	0.503827	1.00168	0.807453
chr14:22615986	chr14	22615986	+	UTR	Samd8	ENSMUSG00000021770	67630	0.047619	NA	0.0625	0.038961	0.084263	NA	0.0535287	0.0611947	NA	0.025641	0.0266667	0.0694444	0.0238095	NA	NA	0.0654762	0.0555556	NA	NA	NA	0.0208333	NA	1.66297	1.09395	1.32669	1.18787	1.20377	1.01654	7.90641	6.03275	5.64505	5.17446	4.46426	5.13795	0.272947	0.256037	0.188868	0.239016	0.27583	0.317283	0.569915	0.412046
chr14:22616933	chr14	22616933	+	UTR	Samd8	ENSMUSG00000021770	67630	NA	NA	NA	NA	NA	NA	NA	NA	NA	NA	NA	0.0185185	0.0175439	0.0222222	0.0246032	NA	0.0151515	0.0642857	0.0196078	NA	NA	0.0418301	1.66297	1.09395	1.32669	1.18787	1.20377	1.01654	7.90641	6.03275	5.64505	5.17446	4.46426	5.13795	0.272947	0.256037	0.188868	0.239016	0.27583	0.317283	0.569915	0.412046
chr14:22617026	chr14	22617026	+	UTR	Samd8	ENSMUSG00000021770	67630	0.0772727	0.0571429	0.0916179	0.115721	0.0222222	0.16888	0.0580808	0.0509913	0.0351852	0.0269841	0.104073	0.0707071	0.0460317	0.112741	0.13733	0.047619	0.033179	0.0499109	0.0290123	0.0811688	0.0776772	0.0585185	1.66297	1.09395	1.32669	1.18787	1.20377	1.01654	7.90641	6.03275	5.64505	5.17446	4.46426	5.13795	0.272947	0.256037	0.188868	0.239016	0.27583	0.317283	0.569915	0.412046
chr14:22617028	chr14	22617028	+	UTR	Samd8	ENSMUSG00000021770	67630	NA	NA	0.0294486	0.0686937	0.0222222	0.0242504	0.0277778	0.071131	0.031746	0.038172	0.0267094	0.0144928	NA	0.104813	NA	0.0400966	NA	0.0196078	0.015873	0.0333333	0.0350877	NA	1.66297	1.09395	1.32669	1.18787	1.20377	1.01654	7.90641	6.03275	5.64505	5.17446	4.46426	5.13795	0.272947	0.256037	0.188868	0.239016	0.27583	0.317283	0.569915	0.412046
chr14:31790141	chr14	31790141	+	Intron	Nek4	ENSMUSG00000021918	23955	NA	0.333333	NA	0.333333	NA	0.111111	0.0833333	NA	NA	NA	0.133333	NA	0.166667	0.333333	0.111111	NA	0.111111	0.333333	NA	0.25	0.333333	0.142857	5.18119	4.12813	3.92268	4.7027	4.341	4.4222	5.06981	5.31196	5.54022	5.89423	5.01743	5.51047	0.205517	0.144155	0.115026	0.163824	0.125059	0.163215	0.262329	0.251746
chr14:45973781	chr14	45973781	+	Intron	Styx	ENSMUSG00000053205	56291	NA	NA	NA	NA	NA	NA	0.0525253	NA	0.030303	0.0944444	NA	0.333333	NA	0.0833333	NA	0.0666667	0.15	0.177778	0.133333	NA	NA	NA	1.78739	2.21334	1.97961	2.17476	1.98894	2.20841	3.65994	4.15959	5.14731	4.60535	4.42762	3.58552	0.38326	0.497868	0.563767	0.629229	0.626756	0.824503	0.605174	0.786607
chr14:51435392	chr14	51435392	+	Intron	Parp2	ENSMUSG00000036023	11546	NA	0.00456621	0.00307603	0.0051908	0.00114548	NA	NA	0.00251572	NA	0.0008726	0.00100705	NA	NA	0.00294985	0.0037037	NA	NA	NA	0.00252525	NA	0.00483092	0.00330033	3.07698	2.2592	2.19643	1.74331	2.13725	1.92953	5.97126	6.54609	4.63304	7.12819	5.12231	6.61687	0.515127	0.408344	0.367965	0.412006	0.515354	0.471161	0.661201	0.410033
chr14:76826640	chr14	76826640	+	Intron	Tsc22d1	ENSMUSG00000022010	21807	NA	NA	NA	0.0416667	0.025641	NA	NA	NA	NA	NA	NA	NA	NA	0.0875	0.0238095	NA	0.0277778	0.0694444	NA	NA	NA	NA	3.06044	3.45297	3.34289	3.35316	3.39214	3.13458	3.04254	2.28087	2.35115	2.73821	2.94862	2.97591	1.10044	0.990809	0.952609	0.97747	1.01714	0.909222	3.81836	3.10507
chr14:8768555	chr14	8768555	+	Exon	Flnb	ENSMUSG00000025278	286940	NA	NA	0.00387597	NA	NA	NA	0.00666667	0.00666667	NA	NA	NA	NA	0.00224467	0.00165654	0.000723066	0.00111111	NA	NA	NA	NA	NA	NA	2.08466	1.98903	1.82093	1.92335	1.9853	1.77466	12.3576	10.1259	11.0639	10.9899	8.96662	10.2418	1.72338	1.79979	1.84373	1.79885	1.36111	1.4228	3.91392	4.01712
chr14:8768562	chr14	8768562	+	Exon	Flnb	ENSMUSG00000025278	286940	NA	0.0114976	0.0206502	0.0278467	0.0387915	NA	0.0235897	0.016129	0.026455	0.071756	0.0189017	0.0137261	0.021303	0.0193554	0.0157717	0.0176567	0.0256514	0.015872	0.0234575	0.0287833	0.0418556	0.0452525	2.08466	1.98903	1.82093	1.92335	1.9853	1.77466	12.3576	10.1259	11.0639	10.9899	8.96662	10.2418	1.72338	1.79979	1.84373	1.79885	1.36111	1.4228	3.91392	4.01712
chr14:8768573	chr14	8768573	+	Intron	Flnb	ENSMUSG00000025278	286940	NA	NA	NA	NA	NA	NA	NA	0.0151515	NA	NA	NA	0.025641	0.047619	0.0138889	0.0679012	0.0719697	0.0608466	NA	NA	NA	NA	0.161905	2.08466	1.98903	1.82093	1.92335	1.9853	1.77466	12.3576	10.1259	11.0639	10.9899	8.96662	10.2418	1.72338	1.79979	1.84373	1.79885	1.36111	1.4228	3.91392	4.01712
chr14:8768612	chr14	8768612	+	Intron	Flnb	ENSMUSG00000025278	286940	NA	NA	NA	NA	0.00666667	NA	NA	NA	NA	NA	NA	0.0166667	0.0350877	NA	0.0155039	NA	NA	NA	0.0107527	0.0357143	NA	NA	2.08466	1.98903	1.82093	1.92335	1.9853	1.77466	12.3576	10.1259	11.0639	10.9899	8.96662	10.2418	1.72338	1.79979	1.84373	1.79885	1.36111	1.4228	3.91392	4.01712
chr14:99601019	chr14	99601019	+	Intron	Pibf1	ENSMUSG00000022064	52023	NA	NA	NA	0.166667	NA	0.030303	0.0416667	NA	0.0555556	NA	0.0416667	NA	0.333333	NA	NA	NA	NA	NA	0.333333	NA	NA	0.444444	5.20676	6.22403	6.15072	6.65963	6.03904	6.23795	10.2402	11.9936	13.0768	14.3611	13.1114	13.901	0.238305	0.245598	0.234329	0.255221	0.291273	0.332703	0.211651	0.241876
chr15:100085923	chr15	100085923	+	Intron	Atf1	ENSMUSG00000023027	11908	0.037037	0.122222	NA	0.0416667	0.030303	0.0808824	0.0666667	NA	0.0969697	0.111111	0.199615	0.0666667	0.0666667	NA	0.355556	NA	0.166667	0.333333	0.166667	0.291667	0.111111	0.166667	3.20547	4.03984	3.74725	3.89132	3.82642	4.03551	5.52191	3.902	5.10917	4.5159	3.68843	5.8681	1.19189	1.40859	1.39326	1.48126	1.38466	1.33181	1.68006	2.01886
chr15:55086437	chr15	55086437	+	UTR	Deptor	ENSMUSG00000022419	97998	0.031746	0.0114943	NA	0.0565432	0.00952381	0.060008	0.0138889	0.0128205	0.0238095	0.0151515	0.0144928	0.047619	NA	0.0175439	0.0277778	0.037037	NA	NA	0.0104167	0.0322581	0.010101	NA	5.01275	6.31472	6.02035	6.46883	6.41406	6.38106	2.73207	4.88044	7.52601	7.18848	6.90873	6.06637	0.197957	0.161248	0.183508	0.298638	0.463219	0.330619	0.161557	0.0391796
chr15:55086823	chr15	55086823	+	UTR	Deptor	ENSMUSG00000022419	97998	NA	0.166667	0.244444	0.208333	0.047619	0.0952381	0.177778	0.237037	0.111111	NA	0.0732601	NA	NA	NA	NA	NA	NA	NA	0.0833333	NA	NA	NA	5.01275	6.31472	6.02035	6.46883	6.41406	6.38106	2.73207	4.88044	7.52601	7.18848	6.90873	6.06637	0.197957	0.161248	0.183508	0.298638	0.463219	0.330619	0.161557	0.0391796
chr15:55086856	chr15	55086856	+	UTR	Deptor	ENSMUSG00000022419	97998	0.0392157	0.0238095	0.00653595	NA	NA	NA	0.015873	0.056929	NA	NA	0.0519048	0.0833333	NA	0.0833333	0.0166667	NA	NA	NA	0.0833333	NA	0.0892857	0.103175	5.01275	6.31472	6.02035	6.46883	6.41406	6.38106	2.73207	4.88044	7.52601	7.18848	6.90873	6.06637	0.197957	0.161248	0.183508	0.298638	0.463219	0.330619	0.161557	0.0391796
chr15:55086867	chr15	55086867	+	UTR	Deptor	ENSMUSG00000022419	97998	0.00740741	0.0963934	0.0582886	0.0238469	0.0193277	0.0340771	0.0241546	0.0642914	0.0181929	0.028882	0.026656	0.0555556	NA	0.0811594	0.0119048	0.0756247	0.037037	0.0703704	0.0699582	0.0333333	0.0185185	0.015873	5.01275	6.31472	6.02035	6.46883	6.41406	6.38106	2.73207	4.88044	7.52601	7.18848	6.90873	6.06637	0.197957	0.161248	0.183508	0.298638	0.463219	0.330619	0.161557	0.0391796
chr15:55086872	chr15	55086872	+	UTR	Deptor	ENSMUSG00000022419	97998	NA	NA	NA	0.00406504	NA	0.00505051	0.00483092	NA	NA	NA	0.0104116	NA	NA	0.0277778	NA	NA	NA	NA	NA	NA	0.031339	NA	5.01275	6.31472	6.02035	6.46883	6.41406	6.38106	2.73207	4.88044	7.52601	7.18848	6.90873	6.06637	0.197957	0.161248	0.183508	0.298638	0.463219	0.330619	0.161557	0.0391796
chr15:55087127	chr15	55087127	+	UTR	Deptor	ENSMUSG00000022419	97998	NA	NA	NA	NA	NA	NA	0.0555556	NA	0.0333333	0.0416667	NA	0.0555556	NA	0.0555556	0.0175439	NA	NA	0.0144928	0.031746	0.0147059	0.0502392	0.0444444	5.01275	6.31472	6.02035	6.46883	6.41406	6.38106	2.73207	4.88044	7.52601	7.18848	6.90873	6.06637	0.197957	0.161248	0.183508	0.298638	0.463219	0.330619	0.161557	0.0391796
chr15:55087178	chr15	55087178	+	UTR	Deptor	ENSMUSG00000022419	97998	NA	NA	NA	NA	NA	NA	NA	NA	NA	0.047619	NA	NA	NA	0.037037	NA	NA	0.037037	NA	0.0451887	0.0185185	0.047619	0.0350877	5.01275	6.31472	6.02035	6.46883	6.41406	6.38106	2.73207	4.88044	7.52601	7.18848	6.90873	6.06637	0.197957	0.161248	0.183508	0.298638	0.463219	0.330619	0.161557	0.0391796
chr15:79737961	chr15	79737961	+	UTR	Apobec3	ENSMUSG00000009585	80287	NA	NA	NA	NA	NA	NA	0.047619	NA	NA	NA	NA	NA	NA	0.00584795	NA	0.0128205	NA	0.0298895	0.0166667	NA	NA	0.0128205	2.37536	1.71317	1.41887	1.62341	1.49907	1.52034	5.09474	3.72837	3.12391	2.66718	2.19009	4.429	0.309439	0.208841	0.179126	0.175813	0.175834	0.14223	0.81418	0.5432
chr15:79737971	chr15	79737971	+	UTR	Apobec3	ENSMUSG00000009585	80287	NA	0.037037	NA	0.047619	0.0666667	0.116667	NA	NA	NA	NA	NA	0.00900901	0.0133333	0.0208333	0.0521593	0.0262346	0.0341517	0.015873	0.0431123	0.03125	0.0512821	0.0926282	2.37536	1.71317	1.41887	1.62341	1.49907	1.52034	5.09474	3.72837	3.12391	2.66718	2.19009	4.429	0.309439	0.208841	0.179126	0.175813	0.175834	0.14223	0.81418	0.5432
chr15:79737977	chr15	79737977	+	UTR	Apobec3	ENSMUSG00000009585	80287	NA	0.047619	NA	NA	0.0740741	0.172222	0.0740741	NA	NA	NA	NA	0.0178571	0.0338511	0.0351197	0.0417638	0.0560304	0.0464453	0.0599435	0.0387205	0.0483871	0.025641	NA	2.37536	1.71317	1.41887	1.62341	1.49907	1.52034	5.09474	3.72837	3.12391	2.66718	2.19009	4.429	0.309439	0.208841	0.179126	0.175813	0.175834	0.14223	0.81418	0.5432
chr15:79738001	chr15	79738001	+	UTR	Apobec3	ENSMUSG00000009585	80287	NA	NA	NA	NA	NA	NA	NA	NA	0.0555556	NA	NA	NA	0.0144928	NA	0.0123457	0.0114943	NA	NA	0.0185185	NA	0.0175439	0.0133333	2.37536	1.71317	1.41887	1.62341	1.49907	1.52034	5.09474	3.72837	3.12391	2.66718	2.19009	4.429	0.309439	0.208841	0.179126	0.175813	0.175834	0.14223	0.81418	0.5432
chr15:79972907	chr15	79972907	+	Intron	Tab1	ENSMUSG00000022414	66513	NA	0.166667	NA	0.0666667	0.0333333	NA	0.0416667	0.030303	0.047619	0.025641	0.0277778	NA	NA	NA	NA	NA	0.0666667	NA	NA	NA	NA	NA	4.03983	3.26858	3.53666	3.82234	3.42862	3.31107	14.8924	12.573	12.1216	13.697	10.8635	12.0675	1.21151	1.2422	1.25568	1.08217	1.09902	1.17203	1.72814	1.25544
chr15:81285395	chr15	81285395	+	UTR	Xpnpep3	ENSMUSG00000022401	321003	NA	NA	NA	NA	NA	NA	NA	0.0666667	NA	NA	NA	0.0380952	0.0222222	0.0208333	NA	0.0636364	NA	0.0277778	0.1	NA	0.0123457	0.0138889	8.94332	8.83643	8.54051	8.90921	8.0768	9.15838	6.94558	7.735	7.14127	6.13892	5.95648	5.97303	0.280236	0.229734	0.201343	0.176648	0.253821	0.257249	0.414799	0.205172
chr15:81286560	chr15	81286560	+	UTR	Xpnpep3	ENSMUSG00000022401	321003	0.0666667	NA	0.166667	NA	0.0833333	0.666667	0.0666667	0.416667	0.333333	0.0833333	NA	0.111111	0.101852	0.0909091	0.149892	0.0858586	0.114286	0.0416667	0.047619	0.0555556	0.130976	0.133866	8.94332	8.83643	8.54051	8.90921	8.0768	9.15838	6.94558	7.735	7.14127	6.13892	5.95648	5.97303	0.280236	0.229734	0.201343	0.176648	0.253821	0.257249	0.414799	0.205172
chr15:81286590	chr15	81286590	+	UTR	Xpnpep3	ENSMUSG00000022401	321003	NA	NA	0.244444	NA	NA	0.388889	0.125	0.5	0.111111	NA	NA	0.142157	0.047619	0.16833	0.122611	0.0844156	0.148148	0.143849	0.166138	0.227083	0.133987	0.122251	8.94332	8.83643	8.54051	8.90921	8.0768	9.15838	6.94558	7.735	7.14127	6.13892	5.95648	5.97303	0.280236	0.229734	0.201343	0.176648	0.253821	0.257249	0.414799	0.205172
chr15:81286592	chr15	81286592	+	UTR	Xpnpep3	ENSMUSG00000022401	321003	0.0833333	NA	NA	NA	NA	NA	NA	NA	NA	NA	NA	NA	NA	NA	0.0175439	NA	0.0277778	NA	0.0185185	0.03125	0.0138889	NA	8.94332	8.83643	8.54051	8.90921	8.0768	9.15838	6.94558	7.735	7.14127	6.13892	5.95648	5.97303	0.280236	0.229734	0.201343	0.176648	0.253821	0.257249	0.414799	0.205172
chr15:81286593	chr15	81286593	+	UTR	Xpnpep3	ENSMUSG00000022401	321003	NA	NA	NA	NA	NA	NA	NA	NA	NA	NA	0.0666667	0.0196078	NA	0.00813008	0.0175439	0.0606061	NA	0.0277778	0.0698006	0.03125	0.0416667	0.0344928	8.94332	8.83643	8.54051	8.90921	8.0768	9.15838	6.94558	7.735	7.14127	6.13892	5.95648	5.97303	0.280236	0.229734	0.201343	0.176648	0.253821	0.257249	0.414799	0.205172
chr15:81287326	chr15	81287326	+	intergenic	Xpnpep3	ENSMUSG00000022401	321003	0.166667	NA	NA	NA	NA	NA	NA	NA	0.444444	NA	0.111111	0.188889	0.0972222	0.223443	0.030303	0.162037	0.147619	0.12963	0.047619	0.05	0.0989011	0.190705	8.94332	8.83643	8.54051	8.90921	8.0768	9.15838	6.94558	7.735	7.14127	6.13892	5.95648	5.97303	0.280236	0.229734	0.201343	0.176648	0.253821	0.257249	0.414799	0.205172
chr15:81287334	chr15	81287334	+	intergenic	Xpnpep3	ENSMUSG00000022401	321003	NA	NA	NA	NA	NA	NA	0.166667	NA	0.0833333	NA	0.0666667	0.037037	NA	NA	NA	0.047619	0.0809524	0.047619	0.047619	NA	0.0534188	0.0719697	8.94332	8.83643	8.54051	8.90921	8.0768	9.15838	6.94558	7.735	7.14127	6.13892	5.95648	5.97303	0.280236	0.229734	0.201343	0.176648	0.253821	0.257249	0.414799	0.205172
chr15:81649714	chr15	81649714	+	Intron	Tef	ENSMUSG00000022389	21685	NA	0.047619	0.0196078	NA	0.037037	NA	NA	NA	NA	NA	NA	0.0666667	0.111111	NA	0.0416667	0.0333333	0.047619	NA	0.0740741	NA	NA	0.0333333	5.11221	4.51886	4.56302	4.84287	4.73476	5.01349	1.58105	1.8219	1.8501	1.91271	1.77579	1.82069	0.900925	0.972378	1.40301	1.55979	1.54428	1.05849	0.620099	0.583733
chr15:93320065	chr15	93320065	+	UTR	Pphln1	ENSMUSG00000036167	223828	NA	0.00607632	0.00709599	0.00197239	0.00906459	NA	NA	0.00289855	0.00974445	0.00540541	NA	NA	0.0031746	NA	NA	0.00529101	0.00273224	NA	NA	NA	0.00793651	NA	3.77075	4.75419	4.62265	5.60594	5.02392	4.66902	9.2781	12.3125	11.9357	12.8511	11.435	13.2708	0.501295	0.62914	0.62935	0.775129	0.82093	0.863176	0.540092	0.481252
chr16:13795034	chr16	13795034	+	Intron	Rrn3	ENSMUSG00000022682	106298	NA	0.0555556	NA	0.0904762	NA	NA	0.0238095	0.0888889	0.0277778	0.0333333	NA	NA	0.133333	0.0833333	NA	NA	NA	0.111111	NA	NA	NA	NA	3.79243	4.57214	4.37748	4.73105	4.3235	3.99208	8.96263	10.5494	10.5271	11.0253	10.3082	9.27024	0.556235	0.614321	0.796803	0.795579	0.910505	0.99898	1.40068	1.31519
chr16:13814094	chr16	13814094	+	UTR	Rrn3	ENSMUSG00000022682	106298	0.0128205	0.0308642	0.0337165	0.0212982	0.0104167	0.010101	0.00980392	0.0282107	NA	0.00740741	0.0220058	0.00140056	0.00340136	0.00191022	NA	0.00581395	0.00657547	0.00339864	NA	0.00200803	0.00942916	0.0039319	3.79243	4.57214	4.37748	4.73105	4.3235	3.99208	8.96263	10.5494	10.5271	11.0253	10.3082	9.27024	0.556235	0.614321	0.796803	0.795579	0.910505	0.99898	1.40068	1.31519
chr16:17518050	chr16	17518050	+	Intron	Lztr1	ENSMUSG00000022761	66863	NA	0.111111	NA	0.166667	NA	NA	0.0555556	NA	NA	NA	NA	NA	0.16	NA	NA	0.0151515	0.0333333	NA	0.030303	NA	0.3125	0.108333	2.6421	3.64163	3.09198	3.55687	3.98028	3.21914	6.00264	7.29011	6.36693	6.59986	6.94875	8.09792	0.626324	0.47782	0.453212	0.443965	0.525719	0.633951	2.64819	2.60434
chr16:20123821	chr16	20123821	+	UTR	Klhl24	ENSMUSG00000062901	75785	0.111111	0.0833333	NA	NA	NA	NA	NA	NA	NA	NA	NA	0.037037	NA	0.0333333	NA	NA	0.133333	NA	0.0666667	0.166667	0.166667	NA	1.31793	0.915483	1.18245	0.874507	0.879207	0.633669	2.99253	2.43698	3.1476	2.19293	1.95553	1.29285	0.183668	0.112834	0.120939	0.10954	0.117572	0.0946308	0.174329	0.168978
chr16:32254010	chr16	32254010	+	Intron	Wdr53	ENSMUSG00000022787	68980	NA	0.111111	0.333333	NA	NA	NA	NA	0.111111	NA	NA	NA	NA	NA	NA	0.0833333	0.030303	NA	NA	NA	NA	0.333333	NA	0.907526	1.04722	1.11677	1.12554	0.908986	1.10161	3.42548	4.78178	3.01879	3.25661	3.05389	4.6187	0.351663	0.281789	0.185463	0.292023	0.402435	0.30215	0.133904	0.109789
chr16:33722486	chr16	33722486	+	Exon	Heg1	ENSMUSG00000075254	77446	0.00401606	0.0359114	0.0466914	0.0416192	0.0484081	0.0716953	0.0547654	0.0666215	0.0418519	0.0642479	0.037265	0.0266667	NA	0.0208333	0.0840909	0.0381264	NA	NA	NA	0.0384615	0.0296443	0.0611111	0.619666	0.406995	0.685611	0.62413	0.448884	0.486895	1.1689	1.3029	1.07869	1.09284	0.787335	1.26425	0.071084	0.0622389	0.0717296	0.0729911	0.118557	0.129416	0.207493	0.174375
chr16:36005166	chr16	36005166	+	Exon	Kpna1	ENSMUSG00000022905	16646	0.0196078	NA	NA	NA	NA	0.0588235	0.0416667	0.0185185	NA	0.037037	NA	NA	NA	NA	NA	NA	0.333333	NA	NA	NA	0.388889	0.166667	3.36759	3.55916	4.02206	3.61848	3.58634	3.61054	5.02209	5.47452	4.86019	5.71274	5.16098	6.76883	0.440562	0.498537	0.547111	0.574043	0.580576	0.646056	0.626856	0.831481
chr16:37832841	chr16	37832841	+	Intron	Fstl1	ENSMUSG00000022816	14314	NA	0.030303	NA	0.0666667	0.0846561	0.0666667	NA	0.030303	0.047619	NA	NA	0.0333333	NA	NA	NA	NA	NA	NA	NA	NA	0.222222	0.444444	1.03412	1.4711	1.25763	1.30059	1.24335	1.56015	10.9407	10.2018	10.1988	9.29058	9.87455	9.37277	2.51637	2.62751	2.51073	2.42525	2.47516	2.67823	2.86583	2.56263
chr16:37835850	chr16	37835850	+	UTR	Fstl1	ENSMUSG00000022816	14314	0.00653595	NA	NA	0.00854701	NA	0.00813008	NA	0.0125567	0.0185185	NA	0.00694444	0.0027523	0.00320652	0.00272428	0.00494568	0.00221452	0.00188324	0.00393148	0.00340777	NA	0.00654132	0.00839497	1.03412	1.4711	1.25763	1.30059	1.24335	1.56015	10.9407	10.2018	10.1988	9.29058	9.87455	9.37277	2.51637	2.62751	2.51073	2.42525	2.47516	2.67823	2.86583	2.56263
chr17:23946199	chr17	23946199	+	Intron	Srrm2	ENSMUSG00000039218	75956	0.0208333	NA	NA	NA	NA	NA	0.00724638	0.00980392	NA	0.00877193	NA	NA	NA	NA	0.0208333	0.047619	NA	NA	NA	0.0454545	NA	NA	7.23956	8.34067	7.76476	8.96654	8.03122	8.3818	11.4742	13.2611	11.0921	13.5074	11.3962	10.1841	3.15086	3.4786	3.76009	3.95901	3.86799	4.09523	5.60602	6.03011
chr17:32184049	chr17	32184049	+	Intron	Rrp1b	ENSMUSG00000058392	72462	NA	0.0833333	NA	NA	NA	NA	NA	NA	NA	0.0333333	NA	NA	0.042328	0.0166667	NA	NA	0.0208333	0.0238095	NA	NA	NA	NA	11.5754	12.8177	12.412	13.1782	12.1868	12.5011	15.7487	18.466	19.226	18.7734	19.6063	20.666	1.04466	2.02629	2.36241	2.38765	2.43709	2.39178	2.25084	2.9629
chr17:32184050	chr17	32184050	+	Intron	Rrp1b	ENSMUSG00000058392	72462	0.0763889	0.0833333	NA	NA	NA	0.00833333	0.00925926	0.00900901	NA	NA	0.0394154	NA	0.0185185	0.0166667	NA	NA	NA	0.0119048	NA	0.0333333	0.0392157	NA	11.5754	12.8177	12.412	13.1782	12.1868	12.5011	15.7487	18.466	19.226	18.7734	19.6063	20.666	1.04466	2.02629	2.36241	2.38765	2.43709	2.39178	2.25084	2.9629
chr17:32184094	chr17	32184094	+	Intron	Rrp1b	ENSMUSG00000058392	72462	0.0333333	NA	0.0333333	0.0492063	0.0266667	0.0429776	0.0478469	0.0104167	0.037037	NA	0.00900901	0.0392157	0.17619	0.037037	0.0811688	0.0128205	0.0555556	0.0444444	0.0333333	0.02	0.062356	0.110845	11.5754	12.8177	12.412	13.1782	12.1868	12.5011	15.7487	18.466	19.226	18.7734	19.6063	20.666	1.04466	2.02629	2.36241	2.38765	2.43709	2.39178	2.25084	2.9629
chr17:32184096	chr17	32184096	+	Intron	Rrp1b	ENSMUSG00000058392	72462	0.0333333	NA	0.0555556	0.0407925	0.0133333	0.0425824	0.0568159	0.0208333	0.0251662	NA	0.0238095	0.0416667	0.125541	0.0826331	0.0508658	0.0371429	0.0447958	0.0359848	0.0151515	0.1025	0.0144928	0.0862434	11.5754	12.8177	12.412	13.1782	12.1868	12.5011	15.7487	18.466	19.226	18.7734	19.6063	20.666	1.04466	2.02629	2.36241	2.38765	2.43709	2.39178	2.25084	2.9629
chr17:32184105	chr17	32184105	+	Intron	Rrp1b	ENSMUSG00000058392	72462	NA	NA	0.0546933	0.018018	0.0246449	0.0353261	0.0266667	0.025679	0.0950855	0.0238095	0.0710227	0.0277778	0.0989011	0.0185185	0.0644928	0.130579	0.0786436	0.161128	0.037037	0.0954545	0.126631	0.122876	11.5754	12.8177	12.412	13.1782	12.1868	12.5011	15.7487	18.466	19.226	18.7734	19.6063	20.666	1.04466	2.02629	2.36241	2.38765	2.43709	2.39178	2.25084	2.9629
chr17:32184119	chr17	32184119	+	Intron	Rrp1b	ENSMUSG00000058392	72462	NA	NA	NA	0.0119048	NA	NA	0.0123457	0.0138889	0.015873	0.0281955	0.00900901	NA	NA	NA	NA	NA	0.027972	0.0277778	NA	0.0454545	0.0448533	NA	11.5754	12.8177	12.412	13.1782	12.1868	12.5011	15.7487	18.466	19.226	18.7734	19.6063	20.666	1.04466	2.02629	2.36241	2.38765	2.43709	2.39178	2.25084	2.9629
chr17:32198702	chr17	32198702	+	UTR	Rrp1b	ENSMUSG00000058392	72462	0.00462963	0.00188324	NA	0.00526398	0.0016835	NA	NA	NA	0.00311526	0.00271003	0.00339273	0.00807498	NA	0.00796006	0.00584975	0.00816425	0.00875988	0.00574713	0.00636396	0.0168582	0.00639731	0.0198806	11.5754	12.8177	12.412	13.1782	12.1868	12.5011	15.7487	18.466	19.226	18.7734	19.6063	20.666	1.04466	2.02629	2.36241	2.38765	2.43709	2.39178	2.25084	2.9629
chr17:5301912	chr17	5301912	+	Intron	Arid1b	ENSMUSG00000069729	239985	NA	0.0952381	NA	0.111111	0.166667	0.0833333	0.0666667	NA	NA	0.0666667	NA	NA	NA	NA	NA	NA	0.166667	NA	NA	NA	NA	0.333333	2.13494	1.79751	1.8353	2.46172	1.79971	2.26791	5.18081	3.93259	3.59528	3.05157	4.35042	4.12587	0.556931	0.500143	0.542155	0.515635	0.494682	0.450884	0.907274	0.93982
chr17:56729416	chr17	56729416	+	Intron	Safb	ENSMUSG00000071054	224903	0.111111	0.0666667	0.0185185	0.0555556	0.0751634	0.030303	NA	0.18254	NA	0.037037	0.030303	0.166667	NA	NA	NA	NA	NA	NA	NA	NA	0.25641	0.166667	6.09837	5.34541	5.59767	6.35647	5.74675	4.86166	7.99235	7.54754	6.97571	7.03469	6.32695	7.61078	1.51839	1.65712	1.49451	1.39208	1.7073	1.80291	3.88192	4.33267
chr17:56730157	chr17	56730157	+	Intron	Safb	ENSMUSG00000071054	224903	0.0277778	NA	NA	NA	NA	NA	0.0333333	0.025641	0.0222222	NA	NA	NA	0.037037	NA	0.166667	NA	NA	0.0666667	NA	NA	NA	NA	6.09837	5.34541	5.59767	6.35647	5.74675	4.86166	7.99235	7.54754	6.97571	7.03469	6.32695	7.61078	1.51839	1.65712	1.49451	1.39208	1.7073	1.80291	3.88192	4.33267
chr17:83835188	chr17	83835188	+	Intron	Eml4	ENSMUSG00000032624	78798	NA	NA	NA	NA	0.0196078	NA	0.0111111	NA	NA	NA	NA	NA	NA	0.0666667	NA	NA	0.138889	0.0666667	0.037037	NA	NA	0.030303	1.29211	1.23855	1.3424	1.69152	1.26713	1.47553	2.12686	3.30643	3.21635	3.29148	2.65106	4.11251	0.386223	0.468407	0.623276	0.769413	1.00468	0.997997	0.796828	0.711086
chr17:83867647	chr17	83867647	+	Intron	Eml4	ENSMUSG00000032624	78798	0.0416667	NA	0.030303	NA	0.0208333	0.0753968	0.015873	0.0333333	0.0628655	0.041514	0.0592593	0.444444	NA	0.111111	0.4	0.111111	0.0666667	0.277778	0.0666667	0.166667	NA	0.0666667	1.29211	1.23855	1.3424	1.69152	1.26713	1.47553	2.12686	3.30643	3.21635	3.29148	2.65106	4.11251	0.386223	0.468407	0.623276	0.769413	1.00468	0.997997	0.796828	0.711086
chr17:88377739	chr17	88377739	+	Intron	Msh6	ENSMUSG00000005370	17688	0.030303	0.122751	NA	0.165414	0.126323	0.0947712	NA	0.0730994	0.0747475	0.0333333	0.128788	0.0997151	0.2	0.161905	0.229798	0.332468	0.228571	0.0444444	0.150997	0.125	0.181606	0.175926	2.90587	2.23519	2.52979	2.09341	2.44514	2.5563	9.34118	8.77458	9.89832	8.07033	6.86659	8.93506	1.916	2.02217	2.04621	1.70915	1.66865	1.8921	2.53292	2.22525
chr17:88377740	chr17	88377740	+	Intron	Msh6	ENSMUSG00000005370	17688	NA	NA	NA	NA	NA	NA	NA	0.0175439	0.0525253	NA	0.0373737	NA	NA	NA	0.0833333	0.0666667	NA	0.0444444	NA	NA	0.0196078	0.037037	2.90587	2.23519	2.52979	2.09341	2.44514	2.5563	9.34118	8.77458	9.89832	8.07033	6.86659	8.93506	1.916	2.02217	2.04621	1.70915	1.66865	1.8921	2.53292	2.22525
chr18:24119137	chr18	24119137	+	Exon	Zfp397	ENSMUSG00000024276	69256	NA	NA	NA	NA	NA	NA	NA	NA	NA	NA	NA	NA	NA	0.018018	0.0114943	0.00724638	0.00537634	0.00680272	0.00584795	NA	NA	NA	2.25677	2.49835	2.79872	2.27869	2.43105	2.28908	10.1087	9.28475	9.69524	10.1886	8.85621	9.87117	0.712588	1.12053	0.919118	1.13037	1.3579	1.52916	1.73413	1.51626
chr18:25423530	chr18	25423530	+	Intron	AW554918	ENSMUSG00000033632	225289	0.333333	0.166667	0.333333	NA	0.166667	NA	NA	NA	NA	NA	NA	NA	NA	NA	NA	NA	0.333333	0.333333	0.333333	NA	NA	NA	1.68581	1.45996	1.52597	1.49837	1.27986	1.53417	4.72932	4.98335	4.21525	5.44207	3.66224	5.19041	0.133547	0.143743	0.118392	0.13325	0.0985252	0.120246	0.585164	0.910014
chr18:35283891	chr18	35283891	+	Intron	Ctnna1	ENSMUSG00000037815	12385	0.0123457	NA	0.0138889	0.0107527	NA	0.0333333	0.0305556	NA	0.0208333	0.031746	NA	NA	NA	NA	NA	NA	NA	NA	NA	NA	NA	NA	1.89214	1.37632	1.42557	1.75409	1.41357	1.71544	8.19559	6.3051	6.25537	4.93748	3.9923	5.68658	0.876742	0.901549	0.829637	0.837077	0.568594	0.64985	1.6528	1.73753
chr18:35283903	chr18	35283903	+	Intron	Ctnna1	ENSMUSG00000037815	12385	NA	0.0123457	NA	0.0555556	NA	0.0133333	0.0284848	NA	NA	0.0185185	0.0407925	NA	0.0666667	NA	0.166667	0.0740741	NA	0.0555556	NA	NA	0.333333	NA	1.89214	1.37632	1.42557	1.75409	1.41357	1.71544	8.19559	6.3051	6.25537	4.93748	3.9923	5.68658	0.876742	0.901549	0.829637	0.837077	0.568594	0.64985	1.6528	1.73753
chr18:35384794	chr18	35384794	+	Intron	Ctnna1	ENSMUSG00000037815	12385	0.0666667	0.0333333	NA	NA	0.030303	NA	NA	0.0333333	NA	NA	0.047619	NA	NA	NA	NA	NA	NA	NA	NA	NA	NA	0.166667	1.89214	1.37632	1.42557	1.75409	1.41357	1.71544	8.19559	6.3051	6.25537	4.93748	3.9923	5.68658	0.876742	0.901549	0.829637	0.837077	0.568594	0.64985	1.6528	1.73753
chr18:35384807	chr18	35384807	+	Intron	Ctnna1	ENSMUSG00000037815	12385	0.0833333	0.030303	0.025641	0.0499109	0.037037	0.0555556	0.0606061	NA	0.111111	0.037037	0.16336	NA	0.233333	0.0833333	0.111111	NA	0.333333	NA	NA	NA	NA	NA	1.89214	1.37632	1.42557	1.75409	1.41357	1.71544	8.19559	6.3051	6.25537	4.93748	3.9923	5.68658	0.876742	0.901549	0.829637	0.837077	0.568594	0.64985	1.6528	1.73753
chr18:61748050	chr18	61748050	+	UTR	Csnk1a1	ENSMUSG00000024576	93687	NA	NA	NA	0.0151515	0.025641	NA	0.0277778	NA	NA	NA	NA	NA	NA	NA	0.0147775	0.00835422	0.00574713	NA	NA	NA	0.0102564	0.0047619	2.08923	1.64847	1.68796	2.25418	2.101	1.78317	2.99399	3.25533	2.71638	2.90769	1.66296	1.50848	1.69335	1.57363	1.32785	1.57787	1.33837	1.45754	2.77682	2.79555
chr18:67631298	chr18	67631298	+	Intron	Prelid3a	ENSMUSG00000024530	225655	0.0666667	NA	NA	NA	NA	NA	0.0666667	NA	NA	0.111111	0.333333	NA	NA	NA	0.333333	NA	0.333333	NA	NA	NA	NA	NA	2.84924	2.42209	2.35238	2.78239	2.51482	3.16455	1.61627	2.31171	3.27973	2.53462	2.99325	3.0633	0.295387	0.371876	0.374785	0.422882	0.665336	0.594465	0.469097	0.452553
chr18:67631350	chr18	67631350	+	Intron	Prelid3a	ENSMUSG00000024530	225655	NA	NA	NA	NA	NA	NA	NA	NA	0.111111	NA	0.166667	NA	NA	NA	NA	0.666667	0.277778	0.0833333	0.111111	NA	NA	NA	2.84924	2.42209	2.35238	2.78239	2.51482	3.16455	1.61627	2.31171	3.27973	2.53462	2.99325	3.0633	0.295387	0.371876	0.374785	0.422882	0.665336	0.594465	0.469097	0.452553
chr18:67631395	chr18	67631395	+	Intron	Prelid3a	ENSMUSG00000024530	225655	NA	NA	0.5	0.037037	NA	NA	0.111111	NA	0.166667	NA	0.0833333	NA	NA	NA	NA	0.166667	NA	NA	NA	NA	0.111111	0.0833333	2.84924	2.42209	2.35238	2.78239	2.51482	3.16455	1.61627	2.31171	3.27973	2.53462	2.99325	3.0633	0.295387	0.371876	0.374785	0.422882	0.665336	0.594465	0.469097	0.452553
chr19:10983285	chr19	10983285	+	UTR	Prpf19	ENSMUSG00000024735	28000	NA	NA	0.141414	NA	NA	NA	NA	NA	0.0833333	NA	NA	NA	NA	NA	NA	NA	NA	NA	0.047619	0.0625	0.0833333	0.0416667	5.77148	7.54055	7.24556	7.44961	6.6413	7.09809	8.3411	12.1598	11.3256	12.3284	10.4363	11.4397	1.08943	1.73478	1.84818	1.7295	1.73552	1.70157	1.97502	2.64557
chr19:3867362	chr19	3867362	+	Exon	Chka	ENSMUSG00000024843	12660	0.00574713	0.021683	0.00880316	0.0121519	0.00321619	0.00589845	0.0104268	0.00682231	0.00826446	0.0111732	0.00704945	0.00666667	0.0070922	0.00343643	0.00617284	0.00537634	0.00546448	0.00520833	0.0126618	NA	0.00606061	0.00505051	2.91898	2.18742	2.79302	2.17191	2.9291	2.44588	13.0484	12.4091	13.7433	13.5594	11.2564	11.7884	0.635528	0.905646	1.01674	0.982068	0.644833	0.589064	1.99541	1.99823
chr19:3867363	chr19	3867363	+	Exon	Chka	ENSMUSG00000024843	12660	0.00297619	0.00197239	0.00355568	0.00322061	0.00283688	0.00219298	0.00887894	NA	0.00374532	0.00191571	0.00440182	NA	NA	NA	0.00387597	NA	0.00294985	0.00813008	NA	NA	0.00333333	NA	2.91898	2.18742	2.79302	2.17191	2.9291	2.44588	13.0484	12.4091	13.7433	13.5594	11.2564	11.7884	0.635528	0.905646	1.01674	0.982068	0.644833	0.589064	1.99541	1.99823
chr19:60898621	chr19	60898621	+	Intron	Fam45a	ENSMUSG00000024993	67894	0.0833333	0.0416667	0.047619	0.133333	0.133333	0.0333333	NA	0.0333333	NA	0.114286	0.155556	NA	NA	0.25	NA	0.111111	0.0666667	NA	NA	0.125	0.277778	0.166667	2.62474	1.88675	2.20665	2.42462	2.33013	2.22131	11.4154	9.83128	9.76382	10.4188	9.02524	7.13109	0.796278	0.50094	0.534011	0.58949	0.566859	0.742763	1.10154	0.732527
chr19:60899134	chr19	60899134	+	Intron	Fam45a	ENSMUSG00000024993	67894	NA	0.047619	NA	0.0833333	0.133333	0.0555556	NA	NA	NA	NA	NA	NA	NA	NA	0.333333	NA	NA	NA	NA	NA	NA	0.111111	2.62474	1.88675	2.20665	2.42462	2.33013	2.22131	11.4154	9.83128	9.76382	10.4188	9.02524	7.13109	0.796278	0.50094	0.534011	0.58949	0.566859	0.742763	1.10154	0.732527
chr19:7609996	chr19	7609996	+	UTR	Atl3	ENSMUSG00000024759	109168	NA	NA	NA	0.030303	NA	0.0416667	0.030303	NA	NA	NA	NA	0.0243324	0.00529101	0.0183773	0.00828957	NA	0.0189372	NA	0.0170087	0.0104167	0.00724638	NA	7.5703	6.29408	6.69266	7.0469	6.28824	6.59266	12.9671	14.5384	14.5357	13.3484	11.9168	14.0586	0.749664	0.72232	0.632518	0.6274	0.731856	0.86809	0.988963	0.951345
chr19:7610021	chr19	7610021	+	UTR	Atl3	ENSMUSG00000024759	109168	NA	0.0666667	NA	NA	NA	NA	NA	NA	NA	NA	NA	NA	NA	0.0343177	0.00456621	0.00617284	0.0128968	0.00854701	NA	NA	0.0268979	NA	7.5703	6.29408	6.69266	7.0469	6.28824	6.59266	12.9671	14.5384	14.5357	13.3484	11.9168	14.0586	0.749664	0.72232	0.632518	0.6274	0.731856	0.86809	0.988963	0.951345
chr19:7612605	chr19	7612605	+	UTR	Atl3	ENSMUSG00000024759	109168	0.0238095	0.0222222	0.0606061	NA	0.0462963	NA	NA	NA	0.0525253	NA	NA	0.0222881	0.0442475	0.0514007	0.0357531	0.0386386	0.0312349	0.0145854	0.0425671	NA	0.0596819	0.0674603	7.5703	6.29408	6.69266	7.0469	6.28824	6.59266	12.9671	14.5384	14.5357	13.3484	11.9168	14.0586	0.749664	0.72232	0.632518	0.6274	0.731856	0.86809	0.988963	0.951345
chr1:10115346	chr1	10115346	+	Intron	Cspp1	ENSMUSG00000056763	211660	NA	NA	NA	NA	NA	0.333333	NA	0.111111	NA	NA	0.111111	0.333333	NA	0.166667	NA	NA	NA	0.166667	NA	NA	0.0833333	NA	2.19888	2.71664	2.50013	2.68549	2.45808	2.30204	2.85543	1.68489	2.0569	2.51195	2.53445	3.24375	0.377851	0.389462	0.398178	0.420248	0.447378	0.470894	0.852714	1.07167
chr1:130073572	chr1	130073572	+	Exon	R3hdm1	ENSMUSG00000056211	226412	0.0972222	0.0416667	NA	NA	0.277778	0.0606061	NA	NA	NA	0.0444444	0.0238095	NA	NA	0.111111	0.0666667	NA	NA	NA	NA	NA	0.222222	NA	2.50932	2.33113	2.63134	2.47873	2.29334	2.58459	3.17924	2.52125	2.97863	2.75579	2.32006	2.37734	0.377943	0.339756	0.307604	0.359088	0.38708	0.417505	0.715184	0.686243
chr1:134334989	chr1	134334989	+	Intron	Dstyk	ENSMUSG00000042046	213452	NA	0.0666667	NA	NA	NA	NA	NA	0.333333	0.0666667	0.0833333	NA	NA	0.333333	NA	NA	NA	NA	NA	NA	0.5	NA	NA	2.13898	1.39078	1.53314	1.77367	1.43556	1.4053	6.61225	5.88187	6.4724	6.19996	5.58328	5.65045	0.381035	0.326696	0.297722	0.260999	0.386372	0.391129	0.776408	0.709684
chr1:158528321	chr1	158528321	+	Intron	Abl2	ENSMUSG00000026596	11352	0.111111	0.0277778	0.0416667	0.177778	0.0740741	0.0740741	0.0555556	0.0666667	0.111111	0.111111	0.166667	NA	0.166667	NA	0.333333	NA	0.333333	0.333333	0.5	NA	0.333333	0.416667	1.72573	2.1771	2.30839	2.20504	2.09475	2.41594	4.78184	5.07231	4.66159	5.09664	4.98508	5.29415	0.58395	0.731771	0.774646	0.859109	0.695831	0.666559	1.32884	1.37163
chr1:158528337	chr1	158528337	+	Intron	Abl2	ENSMUSG00000026596	11352	NA	0.0333333	NA	0.0238095	0.0833333	NA	NA	0.0555556	0.130952	NA	0.0416667	NA	0.333333	NA	NA	NA	0.333333	NA	0.333333	NA	0.333333	NA	1.72573	2.1771	2.30839	2.20504	2.09475	2.41594	4.78184	5.07231	4.66159	5.09664	4.98508	5.29415	0.58395	0.731771	0.774646	0.859109	0.695831	0.666559	1.32884	1.37163
chr1:158530265	chr1	158530265	+	Intron	Abl2	ENSMUSG00000026596	11352	NA	0.0555556	NA	NA	0.047619	0.0333333	0.047619	0.047619	0.0833333	NA	NA	NA	0.333333	0.333333	NA	NA	0.333333	NA	0.333333	NA	NA	0.333333	1.72573	2.1771	2.30839	2.20504	2.09475	2.41594	4.78184	5.07231	4.66159	5.09664	4.98508	5.29415	0.58395	0.731771	0.774646	0.859109	0.695831	0.666559	1.32884	1.37163
chr1:158530495	chr1	158530495	+	Intron	Abl2	ENSMUSG00000026596	11352	NA	NA	NA	0.0666667	NA	0.111111	NA	NA	NA	NA	0.166667	NA	NA	NA	NA	0.333333	0.166667	NA	NA	NA	0.333333	NA	1.72573	2.1771	2.30839	2.20504	2.09475	2.41594	4.78184	5.07231	4.66159	5.09664	4.98508	5.29415	0.58395	0.731771	0.774646	0.859109	0.695831	0.666559	1.32884	1.37163
chr1:174062098	chr1	174062098	+	Intron	Pex19	ENSMUSG00000003464	19298	NA	NA	0.166667	0.166667	0.222222	0.0555556	0.333333	0.333333	0.111111	0.444444	0.0833333	0.333333	NA	NA	0.166667	NA	NA	NA	NA	NA	NA	NA	0.460708	0.575494	0.598182	0.427871	0.586513	0.592738	2.95779	1.60937	2.13506	1.82325	2.27336	2.10274	0.357312	0.251969	0.201946	0.184776	0.34901	0.406034	0.900368	0.756041
chr1:182577586	chr1	182577586	+	Intron	Lin9	ENSMUSG00000058729	72568	0.0833333	NA	NA	NA	NA	0.0833333	0.047619	NA	0.030303	NA	NA	0.166667	0.166667	NA	NA	NA	0.166667	NA	NA	NA	NA	NA	1.68118	1.21783	1.10128	1.33077	1.38247	1.42798	8.76148	5.65042	6.02388	5.7168	4.56761	7.34474	0.448547	0.401147	0.321823	0.327543	0.326145	0.430884	0.659501	0.779409
chr1:191582223	chr1	191582223	+	Intron	Ptpn14	ENSMUSG00000026604	19250	0.0277778	0.0277778	0.0222222	0.0833333	0.0512821	NA	NA	0.0416667	0.0666667	0.0555556	0.0555556	NA	NA	NA	0.0833333	NA	NA	0.111111	NA	NA	0.388889	NA	3.45289	3.84432	4.18792	4.67069	3.83498	4.24706	4.17295	3.6871	3.86853	4.67157	2.9097	5.07875	0.585698	0.587913	0.612181	0.594325	0.577181	0.556963	1.95509	1.98541
chr1:7098112	chr1	7098112	+	Intron	Pcmtd1	ENSMUSG00000051285	319263	NA	0.333333	0.444444	0.222222	0.333333	NA	NA	0.166667	NA	NA	NA	NA	NA	NA	NA	NA	0.333333	0.333333	NA	NA	NA	NA	1.55748	1.18418	1.2711	1.29181	1.15244	1.15833	6.26242	4.78216	4.93025	4.34698	4.1661	4.41496	0.132197	0.109521	0.0787579	0.0899608	0.0940512	0.0915758	0.374833	0.336902
chr1:82845880	chr1	82845880	+	Intron	Agfg1	ENSMUSG00000026159	15463	0.187364	0.341709	0.361111	0.344508	0.135088	0.18954	0.301242	0.310101	0.109428	0.312865	0.279365	0.583333	0.540404	0.777778	0.84127	0.777778	0.304762	0.444444	0.672222	0.75	0.35	0.416667	1.02433	0.843843	1.05591	1.17635	0.918445	1.13008	1.49632	1.97147	2.03631	1.71621	1.23572	1.60227	0.467482	0.583934	0.56434	0.566768	0.473202	0.508005	0.667099	0.677265
chr1:91700393	chr1	91700393	+	Intron	Agap1	ENSMUSG00000055013	347722	0.0666667	NA	NA	0.111111	NA	0.0555556	NA	NA	0.25	NA	0.0555556	NA	0.333333	NA	NA	NA	0.111111	0.333333	NA	0.166667	NA	NA	1.19298	1.92698	2.52696	2.46939	2.47406	2.86704	0.640938	1.36172	0.858357	1.05924	1.16282	1.19448	0.27284	0.348914	0.383566	0.320914	0.487327	0.443884	0.443416	0.412098
chr1:91700455	chr1	91700455	+	Intron	Agap1	ENSMUSG00000055013	347722	NA	NA	0.311111	0.366667	NA	0.111111	0.0666667	NA	0.111111	0.047619	NA	NA	NA	NA	NA	NA	NA	NA	0.333333	NA	0.0833333	NA	1.19298	1.92698	2.52696	2.46939	2.47406	2.86704	0.640938	1.36172	0.858357	1.05924	1.16282	1.19448	0.27284	0.348914	0.383566	0.320914	0.487327	0.443884	0.443416	0.412098
chr1:91702894	chr1	91702894	+	Intron	Agap1	ENSMUSG00000055013	347722	NA	0.166667	0.166667	0.333333	0.166667	NA	0.0666667	0.0833333	NA	NA	NA	NA	NA	NA	NA	NA	NA	NA	NA	NA	0.666667	NA	1.19298	1.92698	2.52696	2.46939	2.47406	2.86704	0.640938	1.36172	0.858357	1.05924	1.16282	1.19448	0.27284	0.348914	0.383566	0.320914	0.487327	0.443884	0.443416	0.412098
chr2:118695677	chr2	118695677	+	Exon	Ivd	ENSMUSG00000027332	56357	NA	0.0666667	NA	0.111111	NA	0.166667	NA	NA	NA	NA	NA	NA	NA	0.0555556	NA	NA	NA	0.0833333	NA	NA	NA	0.222222	0.972269	0.524659	0.425898	0.752685	0.530591	0.381462	4.52391	3.42569	3.18518	2.76674	2.79469	3.61683	0.228447	0.197871	0.117933	0.118309	0.120152	0.212423	0.692168	0.448074
chr2:119737546	chr2	119737546	+	Intron	Mga	ENSMUSG00000033943	29808	NA	0.037037	0.0277778	0.0185185	NA	0.0277778	NA	0.0238095	0.030303	NA	NA	0.166667	NA	NA	NA	NA	NA	NA	NA	NA	NA	NA	0.321677	0.232123	0.437396	0.362571	0.459733	0.51813	0.0802378	0.0802378	0.383101	0.0802378	0.254334	0.179745	0.557214	0.577384	0.60263	0.651922	0.658955	0.745405	2.88088	2.6357
chr2:127110545	chr2	127110545	+	UTR	Stard7	ENSMUSG00000027367	99138	NA	0.0666667	NA	0.0196078	NA	NA	0.0833333	NA	0.0416667	NA	0.0666667	NA	NA	NA	0.111111	NA	NA	NA	NA	0.166667	NA	NA	4.29982	3.97487	4.6361	5.10008	4.61109	4.29158	15.2534	14.5945	15.4658	17.4123	13.1952	15.0198	0.527448	0.478021	0.547688	0.539287	0.670026	0.785144	0.674478	0.913645
chr2:127110778	chr2	127110778	+	UTR	Stard7	ENSMUSG00000027367	99138	0.0102109	0.0226806	0.052816	0.0542043	0.0564286	0.0442508	0.0938266	0.0460705	0.0516298	0.0567379	0.058748	0.0307407	0.0189372	0.0433027	0.0522162	0.0340771	0.0247631	0.0289634	0.0411808	0.0511509	0.0387093	0.0309455	4.29982	3.97487	4.6361	5.10008	4.61109	4.29158	15.2534	14.5945	15.4658	17.4123	13.1952	15.0198	0.527448	0.478021	0.547688	0.539287	0.670026	0.785144	0.674478	0.913645
chr2:131073850	chr2	131073850	+	intergenic	Mavs	ENSMUSG00000037523	228607	NA	NA	NA	NA	NA	NA	0.111111	0.166667	0.0833333	0.111111	0.037037	NA	NA	0.333333	NA	0.444444	0.133333	NA	0.305556	NA	0.194444	NA	1.97993	2.38186	2.1728	2.3518	2.00918	2.14307	5.92719	5.71584	6.72942	6.80883	6.70546	6.40751	0.414902	0.575074	0.594978	0.683531	0.875227	0.872412	1.01701	1.01276
chr2:132135616	chr2	132135616	+	UTR	Cds2	ENSMUSG00000058793	110911	NA	NA	0.333333	NA	0.0666667	NA	NA	0.0666667	NA	NA	0.111111	0.0454545	0.0446429	0.0222222	0.133333	0.100673	0.093985	0.214286	0.075	0.0833333	NA	0.030303	1.98913	1.45954	1.75499	1.79399	1.5241	1.65285	5.72246	3.97857	4.74832	3.76815	4.04173	3.05988	0.236311	0.239415	0.192756	0.108137	0.240257	0.216739	0.557813	0.400792
chr2:145734188	chr2	145734188	+	Intron	Naa20	ENSMUSG00000002728	67877	NA	0.0666667	NA	0.0196078	0.0175439	NA	0.015873	NA	NA	0.0104167	0.0222222	NA	NA	NA	NA	NA	NA	NA	NA	NA	NA	NA	2.78013	2.93459	3.29212	3.28148	3.01602	3.02592	8.80684	8.16455	6.19438	8.97595	7.05853	8.71636	1.29175	1.70129	1.54737	1.62358	1.91348	2.03687	1.1267	1.43486
chr2:160514391	chr2	160514391	+	Intron	Top1	ENSMUSG00000070544	21969	0.0238095	0.0166667	NA	NA	0.0107527	0.00813008	NA	0.0138889	NA	0.0144928	NA	NA	NA	NA	0.12963	NA	NA	NA	NA	NA	0.0833333	0.166667	7.85382	7.1741	6.63265	7.82006	6.47113	7.28191	12.9995	12.303	10.6541	13.2779	11.7855	12.9708	0.903931	0.917104	0.996277	1.10931	1.02647	1.14124	1.62808	1.82062
chr2:160514392	chr2	160514392	+	Intron	Top1	ENSMUSG00000070544	21969	0.025641	NA	0.0151515	NA	0.0104167	NA	NA	NA	NA	0.0138889	NA	NA	NA	NA	0.162963	0.047619	0.0833333	0.25	0.0666667	NA	0.0666667	0.166667	7.85382	7.1741	6.63265	7.82006	6.47113	7.28191	12.9995	12.303	10.6541	13.2779	11.7855	12.9708	0.903931	0.917104	0.996277	1.10931	1.02647	1.14124	1.62808	1.82062
chr2:160514428	chr2	160514428	+	Intron	Top1	ENSMUSG00000070544	21969	0.0238095	NA	NA	NA	0.0151515	NA	NA	NA	NA	0.0138889	0.0144928	NA	NA	0.047619	NA	NA	0.0222222	NA	NA	NA	NA	NA	7.85382	7.1741	6.63265	7.82006	6.47113	7.28191	12.9995	12.303	10.6541	13.2779	11.7855	12.9708	0.903931	0.917104	0.996277	1.10931	1.02647	1.14124	1.62808	1.82062
chr2:160545736	chr2	160545736	+	Intron	Top1	ENSMUSG00000070544	21969	0.0196078	0.0133333	0.00877193	0.0336538	0.025641	0.0133333	NA	NA	NA	0.00877193	0.0180375	0.0666667	0.0666667	NA	NA	NA	NA	NA	0.047619	NA	0.103175	0.0809524	7.85382	7.1741	6.63265	7.82006	6.47113	7.28191	12.9995	12.303	10.6541	13.2779	11.7855	12.9708	0.903931	0.917104	0.996277	1.10931	1.02647	1.14124	1.62808	1.82062
chr2:166850333	chr2	166850333	+	UTR	Ddx27	ENSMUSG00000017999	228889	NA	NA	NA	NA	NA	0.0123457	0.0289352	0.0107527	0.0257937	NA	0.0151515	NA	NA	NA	0.0306373	NA	NA	NA	NA	NA	0.0119048	NA	5.58485	5.75941	5.73625	6.08895	5.26006	5.24449	5.51368	7.94236	8.71415	9.40446	9.92089	9.36032	1.03993	1.38492	1.59291	1.62094	1.51282	1.46772	2.32617	2.76736
chr2:166851081	chr2	166851081	+	UTR	Ddx27	ENSMUSG00000017999	228889	NA	NA	0.00606061	0.0070922	0.0138528	0.0147392	0.00606061	NA	NA	NA	NA	NA	NA	0.0211538	0.0119048	0.0107527	NA	NA	0.00793651	NA	NA	NA	5.58485	5.75941	5.73625	6.08895	5.26006	5.24449	5.51368	7.94236	8.71415	9.40446	9.92089	9.36032	1.03993	1.38492	1.59291	1.62094	1.51282	1.46772	2.32617	2.76736
chr2:167763464	chr2	167763464	+	Intron	Ptpn1	ENSMUSG00000027540	19246	0.037037	0.222222	0.0333333	NA	0.15	0.047619	0.0416667	NA	0.0416667	0.0666667	NA	NA	0.166667	NA	NA	NA	NA	0.111111	NA	NA	NA	NA	2.94473	1.94171	2.37867	1.97242	2.0414	1.87642	7.75144	7.0714	8.28106	8.23619	6.0745	7.04611	0.499974	0.589891	0.674116	0.606323	0.50362	0.556447	1.18551	1.40277
chr2:173500382	chr2	173500382	+	Intron	Rab22a	ENSMUSG00000027519	19334	NA	0.0833333	0.111111	0.047619	0.0972222	0.4	0.047619	NA	NA	0.208333	0.0858586	NA	NA	0.111111	NA	NA	NA	NA	NA	0.5	NA	NA	1.23583	0.842565	1.17538	0.85855	1.02158	0.695197	7.17838	5.53871	6.37584	6.52051	4.91619	3.89754	0.578118	0.536469	0.497843	0.469084	0.394037	0.427506	0.730143	0.656353
chr2:181607833	chr2	181607833	+	intergenic	Polr3k	ENSMUSG00000038628	67005	NA	NA	0.166667	NA	NA	0.0666667	0.0666667	NA	0.111111	NA	0.047619	NA	0.166667	NA	NA	NA	0.111111	NA	0.333333	NA	0.111111	NA	2.59493	2.31587	2.54767	2.86128	2.29271	2.13349	7.98887	7.422	6.77797	6.88864	6.44721	7.10723	0.61316	0.404738	0.484474	0.563013	0.616716	0.61091	0.966331	0.82215
chr2:28701956	chr2	28701956	+	Intron	Ddx31	ENSMUSG00000026806	227674	NA	NA	NA	NA	0.0333333	0.0175439	NA	NA	NA	NA	NA	NA	NA	NA	NA	0.047619	0.037037	0.111111	NA	NA	NA	0.0666667	9.74859	9.57337	9.44789	10.4102	10.1569	9.45593	7.85242	10.0332	11.2908	10.7143	8.36541	8.36086	0.59103	0.807972	0.889913	0.977186	0.867378	0.769336	1.00546	1.14379
chr2:28917864	chr2	28917864	+	Intron	Ttf1	ENSMUSG00000026803	22130	NA	NA	NA	NA	NA	NA	NA	0.0833333	NA	0.0666667	0.108333	NA	NA	0.047619	NA	NA	0.0833333	NA	NA	NA	0.0666667	NA	1.18366	1.10263	1.24412	1.23925	1.15133	1.17392	7.33396	7.38982	7.66101	7.61016	5.66827	6.69005	0.466352	0.385752	0.325012	0.33135	0.446219	0.407919	0.395568	0.333403
chr2:31549619	chr2	31549619	+	Intron	Abl1	ENSMUSG00000026842	11350	0.12037	0.386364	NA	0.671717	0.166667	0.206349	0.0833333	0.22906	0.5	NA	0.583333	0.666667	0.333333	0.333333	0.333333	NA	NA	NA	NA	NA	0.333333	NA	1.42591	1.03148	0.931276	1.00095	1.27889	0.597986	3.4385	2.89374	2.23917	2.26622	2.32787	3.43127	0.713017	0.614961	0.660222	0.612299	0.568917	0.575523	1.99545	2.42916
chr2:32254991	chr2	32254991	+	Intron	Ptges2	ENSMUSG00000026820	96979	NA	NA	NA	0.0833333	NA	NA	NA	NA	NA	NA	NA	NA	NA	NA	NA	NA	0.666667	NA	0.0833333	0.333333	0.166667	0.166667	5.67825	6.21604	5.84497	7.53378	6.37237	6.67286	5.96016	6.96753	7.99731	6.24095	6.25645	7.06628	0.456576	0.598495	0.752128	0.681363	0.568537	0.687727	0.793856	1.12858
chr2:32738813	chr2	32738813	+	Intron	Fam129b	ENSMUSG00000026796	227737	0.0555556	NA	NA	0.00854701	0.0627839	0.0763889	NA	NA	NA	NA	0.0669935	NA	NA	0.0416667	NA	0.0555556	NA	NA	NA	NA	0.111111	NA	4.98677	3.37758	4.2563	3.86603	3.88495	3.99583	11.1147	9.96211	9.26013	10.5739	6.60456	5.49262	1.61831	1.98365	1.98203	2.08296	1.36139	1.38894	3.05674	3.95136
chr2:59544664	chr2	59544664	+	Intron	Tanc1	ENSMUSG00000035168	66860	NA	NA	NA	NA	0.0333333	0.037037	NA	0.047619	NA	NA	0.0277778	NA	NA	NA	0.333333	NA	NA	0.0833333	NA	NA	NA	NA	3.5929	2.62592	2.80165	2.60574	2.45409	2.38123	8.90795	9.5127	7.16103	9.12195	6.96135	7.56761	0.680038	0.849446	0.832954	0.764872	0.637169	0.566698	1.50362	1.41584
chr2:59658619	chr2	59658619	+	Exon	Tanc1	ENSMUSG00000035168	66860	0.0686937	0.0551227	0.0934229	0.0806366	0.0720663	0.0811137	0.126712	0.0619113	0.0447246	0.0959752	0.0695302	0.0555556	NA	0.015873	NA	0.0416667	0.0714286	0.0392157	NA	0.0555556	0.037037	NA	3.5929	2.62592	2.80165	2.60574	2.45409	2.38123	8.90795	9.5127	7.16103	9.12195	6.96135	7.56761	0.680038	0.849446	0.832954	0.764872	0.637169	0.566698	1.50362	1.41584
chr2:90599903	chr2	90599903	+	Intron	Fnbp4	ENSMUSG00000008200	55935	NA	0.0175439	0.0144928	0.0268384	0.0401235	0.00854701	NA	0.0246914	NA	NA	NA	NA	NA	NA	NA	NA	NA	0.030303	NA	NA	0.0333333	NA	9.19726	8.21692	7.28712	7.59098	7.67709	6.93639	12.8318	14.6474	12.3468	15.4579	12.3804	13.7002	1.36042	1.54881	1.5653	1.79607	1.77994	1.97842	1.58544	1.48403
chr2:90609875	chr2	90609875	+	Intron	Fnbp4	ENSMUSG00000008200	55935	NA	NA	0.00775194	0.00833333	0.00952381	0.00606061	NA	0.00952381	NA	NA	NA	NA	0.0185185	0.0123457	NA	NA	0.0277778	NA	NA	0.0294118	0.0238095	NA	9.19726	8.21692	7.28712	7.59098	7.67709	6.93639	12.8318	14.6474	12.3468	15.4579	12.3804	13.7002	1.36042	1.54881	1.5653	1.79607	1.77994	1.97842	1.58544	1.48403
chr2:90613385	chr2	90613385	+	Intron	Fnbp4	ENSMUSG00000008200	55935	NA	NA	0.0408903	0.0123457	0.021645	0.0187793	0.025784	0.0200413	0.0271465	0.0180736	0.0214372	0.0473856	0.0734649	0.0387205	0.0946265	0.0722222	0.0463446	0.015873	0.030719	NA	0.0499109	0.025641	9.19726	8.21692	7.28712	7.59098	7.67709	6.93639	12.8318	14.6474	12.3468	15.4579	12.3804	13.7002	1.36042	1.54881	1.5653	1.79607	1.77994	1.97842	1.58544	1.48403
chr2:90613386	chr2	90613386	+	Intron	Fnbp4	ENSMUSG00000008200	55935	NA	0.00877193	0.0119048	NA	NA	0.00925926	NA	0.0107527	0.010101	0.00606061	NA	0.0208333	0.0175439	NA	0.0668004	0.0277778	NA	0.015873	NA	NA	NA	0.0384615	9.19726	8.21692	7.28712	7.59098	7.67709	6.93639	12.8318	14.6474	12.3468	15.4579	12.3804	13.7002	1.36042	1.54881	1.5653	1.79607	1.77994	1.97842	1.58544	1.48403
chr2:90613411	chr2	90613411	+	Intron	Fnbp4	ENSMUSG00000008200	55935	NA	0.0185185	0.0266667	0.00606061	NA	NA	0.00980392	NA	NA	NA	0.00775194	NA	NA	NA	NA	NA	NA	0.0286935	0.0138889	NA	NA	NA	9.19726	8.21692	7.28712	7.59098	7.67709	6.93639	12.8318	14.6474	12.3468	15.4579	12.3804	13.7002	1.36042	1.54881	1.5653	1.79607	1.77994	1.97842	1.58544	1.48403
chr2:91386051	chr2	91386051	+	Intron	Ckap5	ENSMUSG00000040549	75786	NA	NA	NA	NA	NA	0.0166667	0.03367	NA	NA	0.0114943	0.0416667	0.111111	NA	NA	NA	NA	NA	NA	NA	NA	NA	0.0833333	2.08406	2.00241	1.78975	2.04212	1.76901	2.36882	4.94924	4.7217	3.33609	3.47674	3.98628	6.45647	0.81191	0.738351	0.597283	0.577283	0.55466	0.795843	1.22492	1.09621
chr2:91419252	chr2	91419252	+	Intron	Ckap5	ENSMUSG00000040549	75786	0.0123457	NA	NA	NA	0.030303	0.015873	NA	NA	0.0361111	0.0208333	NA	NA	NA	NA	NA	NA	NA	NA	NA	NA	NA	0.0416667	2.08406	2.00241	1.78975	2.04212	1.76901	2.36882	4.94924	4.7217	3.33609	3.47674	3.98628	6.45647	0.81191	0.738351	0.597283	0.577283	0.55466	0.795843	1.22492	1.09621
chr2:91443295	chr2	91443295	+	Intron	Ckap5	ENSMUSG00000040549	75786	0.0196078	0.0104167	0.047619	0.114846	0.0492063	0.0222222	0.025641	0.0175439	0.0343915	NA	0.0284848	0.047619	0.261111	NA	0.0416667	NA	0.0952381	NA	NA	NA	NA	NA	2.08406	2.00241	1.78975	2.04212	1.76901	2.36882	4.94924	4.7217	3.33609	3.47674	3.98628	6.45647	0.81191	0.738351	0.597283	0.577283	0.55466	0.795843	1.22492	1.09621
chr3:102870007	chr3	102870007	+	UTR	Nras	ENSMUSG00000027852	18176	NA	NA	NA	NA	NA	NA	NA	NA	NA	NA	NA	NA	NA	0.0026455	0.00248756	NA	0.0026455	0.00282486	0.00292398	0.00537634	NA	NA	5.25289	4.25247	4.81319	3.87151	4.29843	3.59989	14.9806	13.258	12.4982	13.5566	12.5121	12.5738	1.78217	2.05886	1.81525	1.88426	1.76391	1.59757	2.00563	2.92361
chr3:102870013	chr3	102870013	+	UTR	Nras	ENSMUSG00000027852	18176	NA	0.0123457	NA	0.00595238	0.00854701	NA	0.0226054	0.00813008	NA	NA	0.00740741	0.00845212	0.0247083	0.0197412	0.0149711	0.00551907	0.0320731	0.0146827	0.017657	0.00588235	0.011236	0.0181152	5.25289	4.25247	4.81319	3.87151	4.29843	3.59989	14.9806	13.258	12.4982	13.5566	12.5121	12.5738	1.78217	2.05886	1.81525	1.88426	1.76391	1.59757	2.00563	2.92361
chr3:102870045	chr3	102870045	+	UTR	Nras	ENSMUSG00000027852	18176	0.010101	NA	0.0231194	0.00877193	0.015873	0.0114943	0.00757576	0.056391	NA	0.010101	NA	0.00787815	0.00483193	0.00714359	0.0169876	0.025859	0.00761644	0.0116794	0.0159841	0.0102041	0.0225385	0.0149123	5.25289	4.25247	4.81319	3.87151	4.29843	3.59989	14.9806	13.258	12.4982	13.5566	12.5121	12.5738	1.78217	2.05886	1.81525	1.88426	1.76391	1.59757	2.00563	2.92361
chr3:132420115	chr3	132420115	+	Intron	Tbck	ENSMUSG00000028030	271981	NA	0.0666667	NA	NA	0.0833333	NA	0.166667	NA	0.166667	0.166667	NA	NA	NA	NA	NA	NA	0.166667	NA	NA	NA	NA	NA	3.31108	2.73547	3.27401	3.34813	3.35403	3.34611	5.7053	5.09427	5.63743	6.79344	4.31785	4.58606	0.158125	0.142259	0.138502	0.118997	0.151286	0.161848	0.321382	0.151858
chr3:40556331	chr3	40556331	+	Intron	Hspa4l	ENSMUSG00000025757	18415	NA	0.0654762	0.0969697	0.047619	NA	NA	0.0588235	0.015873	0.0238095	0.0730822	0.042328	0.214286	NA	0.0833333	NA	NA	NA	NA	NA	NA	0.111111	0.242857	3.08306	3.12248	3.20773	3.35877	3.20476	3.16239	4.04845	5.05995	3.55059	3.46727	2.68044	5.24654	0.461563	0.371039	0.31648	0.288402	0.30678	0.516297	0.542702	0.584954
chr3:40597111	chr3	40597111	+	intergenic	Hspa4l	ENSMUSG00000025757	18415	NA	NA	NA	NA	NA	0.0151515	NA	NA	NA	0.0166667	0.017094	NA	0.00925926	NA	0.0100941	0.00775194	0.00793651	0.0178529	0.00584795	0.0108696	0.00798661	0.0125942	3.08306	3.12248	3.20773	3.35877	3.20476	3.16239	4.04845	5.05995	3.55059	3.46727	2.68044	5.24654	0.461563	0.371039	0.31648	0.288402	0.30678	0.516297	0.542702	0.584954
chr3:40597116	chr3	40597116	+	intergenic	Hspa4l	ENSMUSG00000025757	18415	NA	0.0151515	NA	0.0196078	NA	0.0138889	NA	0.0347222	NA	0.00833333	0.0193122	0.00564972	0.0125786	0.0206406	0.0150265	0.0130769	0.00793651	0.0248207	0.00775194	NA	0.0402833	0.0261165	3.08306	3.12248	3.20773	3.35877	3.20476	3.16239	4.04845	5.05995	3.55059	3.46727	2.68044	5.24654	0.461563	0.371039	0.31648	0.288402	0.30678	0.516297	0.542702	0.584954
chr3:40598184	chr3	40598184	+	intergenic	Hspa4l	ENSMUSG00000025757	18415	NA	NA	NA	NA	NA	NA	0.010929	NA	NA	NA	NA	NA	NA	0.00673401	0.0137931	0.00123457	0.000831255	0.0234742	NA	0.00235849	0.000814996	0.00791272	3.08306	3.12248	3.20773	3.35877	3.20476	3.16239	4.04845	5.05995	3.55059	3.46727	2.68044	5.24654	0.461563	0.371039	0.31648	0.288402	0.30678	0.516297	0.542702	0.584954
chr3:40757895	chr3	40757895	+	Intron	Larp1b	ENSMUSG00000025762	214048	NA	NA	0.161905	0.105556	NA	0.108466	0.125541	0.0833333	NA	0.130952	0.216667	NA	NA	NA	0.444444	0.166667	NA	0.0833333	NA	NA	0.166667	NA	2.36382	1.62127	2.04	2.11206	2.1049	2.08966	1.29559	2.27004	2.48124	2.18754	2.04543	1.87172	0.0723952	0.130179	0.149865	0.201471	0.220814	0.186658	0.0591888	0.222886
chr3:51050527	chr3	51050527	+	UTR	Noct	ENSMUSG00000023087	12457	0.0819048	0.028749	0.07961	0.104857	0.0677978	0.0358456	0.0444444	0.0724432	0.0791997	0.0999455	0.0985772	0.224074	0.0608466	0.153439	0.0714286	0.138528	0.19943	0.133929	0.0769231	0.509524	0.113636	0.136512	4.10744	4.18937	4.15723	4.37551	4.0993	4.69963	11.0819	12.4637	11.857	11.6079	13.285	12.8117	0.6881	1.26777	1.3143	1.34741	1.05002	1.05328	2.87183	3.9336
chr3:58255373	chr3	58255373	+	Intron	Tsc22d2	ENSMUSG00000027806	72033	NA	0.0104167	0.00724638	NA	NA	0.00694444	NA	NA	0.00854701	NA	0.0106061	0.0376984	0.05	NA	0.015873	NA	0.05	NA	0.0196078	NA	0.0166667	0.037037	4.50798	3.81679	3.77346	3.97787	3.90192	3.9451	5.19372	4.0551	5.11841	4.28544	5.22428	5.13211	2.55595	2.04781	2.0253	2.26396	2.03107	2.01364	2.04689	2.28559
chr3:87454996	chr3	87454996	+	Intron	Arhgef11	ENSMUSG00000041977	213498	NA	0.111111	0.166667	0.166667	0.5	0.333333	0.333333	NA	0.666667	NA	0.277778	NA	NA	NA	NA	NA	NA	NA	NA	0.5	NA	NA	0.697368	0.617806	0.580394	0.698202	0.641362	0.856725	0.493615	0.384261	0.300263	0.21973	0.530735	0.623685	0.223446	0.190501	0.201399	0.149893	0.142046	0.160076	0.366719	0.360497
chr3:94920147	chr3	94920147	+	Intron	Vps72	ENSMUSG00000008958	21427	NA	0.138889	0.0666667	0.0833333	0.166667	0.0666667	NA	NA	NA	NA	NA	NA	NA	0.111111	NA	NA	0.166667	0.166667	0.111111	NA	NA	0.166667	1.35516	2.01337	1.73507	2.39069	2.4046	2.19767	6.40985	8.31733	8.95924	8.82038	6.49726	7.39022	0.707548	0.580243	0.707367	0.7933	0.73295	1.12127	1.18591	0.570843
chr4:102804229	chr4	102804229	+	Intron	Mier1	ENSMUSG00000028522	71148	0.0666667	NA	NA	NA	0.0333333	NA	NA	0.0753968	0.0371517	0.05	0.0434174	0.166667	0.0555556	0.166667	0.0972222	0.0555556	0.119192	NA	0.0416667	0.225	0.111111	NA	1.99739	1.62953	1.57628	1.44246	1.41138	1.69853	11.4335	10.0798	8.81017	8.1613	7.22718	9.1884	0.859839	0.761324	0.666246	0.685964	0.666913	0.779871	1.43634	1.75315
chr4:102838007	chr4	102838007	+	UTR	Mier1	ENSMUSG00000028522	71148	0.0277778	NA	NA	NA	NA	NA	0.0333333	NA	NA	NA	NA	NA	0.0148693	0.012963	0.017094	0.0173423	0.0306279	0.0310863	NA	0.0111111	0.00595238	NA	1.99739	1.62953	1.57628	1.44246	1.41138	1.69853	11.4335	10.0798	8.81017	8.1613	7.22718	9.1884	0.859839	0.761324	0.666246	0.685964	0.666913	0.779871	1.43634	1.75315
chr4:106024166	chr4	106024166	+	Intron	Usp24	ENSMUSG00000028514	329908	0.047619	0.030303	NA	0.030303	0.0166667	0.037037	NA	NA	0.0666667	0.0196078	NA	0.2	NA	NA	NA	NA	0.25	NA	NA	NA	NA	0.111111	2.55105	3.05777	2.86705	3.40168	3.46309	2.94516	5.01357	5.13068	5.19892	5.18883	4.14207	4.83689	0.649409	0.837226	0.806208	0.855283	0.862123	0.88316	2.00631	2.24007
chr4:106024167	chr4	106024167	+	Intron	Usp24	ENSMUSG00000028514	329908	0.047619	0.030303	0.140741	0.0416667	0.0166667	NA	NA	0.0555556	NA	NA	NA	0.15	NA	0.416667	NA	NA	0.25	NA	NA	NA	NA	NA	2.55105	3.05777	2.86705	3.40168	3.46309	2.94516	5.01357	5.13068	5.19892	5.18883	4.14207	4.83689	0.649409	0.837226	0.806208	0.855283	0.862123	0.88316	2.00631	2.24007
chr4:107054942	chr4	107054942	+	Intron	Ndc1	ENSMUSG00000028614	72787	NA	0.030303	0.0416667	NA	0.0333333	NA	0.0196078	0.047619	NA	0.0416667	0.0833333	0.111111	NA	NA	NA	0.0555556	NA	NA	NA	0.05	NA	NA	4.60082	4.16902	3.67822	4.3164	4.12138	4.70126	8.58701	9.02549	9.42145	9.31817	8.37815	10.6138	0.766909	0.872558	0.819066	0.821452	0.933038	1.10633	0.826814	1.22098
chr4:107054955	chr4	107054955	+	Intron	Ndc1	ENSMUSG00000028614	72787	0.030303	0.047619	0.311111	0.111111	0.0333333	NA	0.0793651	NA	0.214815	0.0238095	0.0779221	NA	NA	0.333333	0.0555556	NA	NA	0.333333	NA	NA	NA	NA	4.60082	4.16902	3.67822	4.3164	4.12138	4.70126	8.58701	9.02549	9.42145	9.31817	8.37815	10.6138	0.766909	0.872558	0.819066	0.821452	0.933038	1.10633	0.826814	1.22098
chr4:107085433	chr4	107085433	+	Intron	Ndc1	ENSMUSG00000028614	72787	NA	NA	NA	0.030303	0.030303	NA	0.025641	NA	0.037037	NA	NA	NA	NA	0.133333	0.380952	NA	0.030303	NA	0.030303	NA	NA	0.047619	4.60082	4.16902	3.67822	4.3164	4.12138	4.70126	8.58701	9.02549	9.42145	9.31817	8.37815	10.6138	0.766909	0.872558	0.819066	0.821452	0.933038	1.10633	0.826814	1.22098
chr4:108013721	chr4	108013721	+	UTR	Coa7	ENSMUSG00000048351	69893	NA	NA	NA	0.333333	NA	NA	NA	0.333333	NA	NA	NA	0.333333	0.666667	0.333333	NA	NA	0.333333	0.333333	NA	1	0.333333	0.333333	2.99363	2.74022	2.38987	3.27031	3.04107	2.94823	4.81698	4.46387	4.73798	4.90321	4.23096	5.34578	0.346565	0.397486	0.302218	0.34495	0.426065	0.497136	1.16318	1.17733
chr4:116211844	chr4	116211844	+	intergenic	Ipp	ENSMUSG00000028696	16351	NA	NA	NA	NA	NA	NA	NA	NA	NA	NA	NA	NA	0.0833333	0.0666667	NA	0.047619	NA	NA	0.0555556	0.0714286	NA	0.111111	2.21101	2.37763	2.01619	2.44277	2.06495	2.12516	9.37684	9.33322	9.66355	10.1271	8.66002	10.1318	0.187738	0.159405	0.121151	0.113171	0.151558	0.152711	0.144421	0.123255
chr4:116250118	chr4	116250118	+	Intron	Gpbp1l1	ENSMUSG00000034042	77110	NA	NA	NA	NA	0.0666667	0.0333333	NA	NA	0.0555556	NA	0.0333333	NA	NA	NA	NA	NA	NA	NA	0.111111	NA	0.0666667	NA	5.46731	4.72045	4.44633	4.96475	4.50227	4.76737	6.14183	4.22245	4.23517	4.39792	3.67732	4.45323	0.628836	0.43458	0.350315	0.377829	0.423891	0.478064	2.47009	2.56234
chr4:124621620	chr4	124621620	+	Exon	9930104L06Rik	ENSMUSG00000044730	194268	NA	0.047619	NA	NA	NA	NA	NA	NA	NA	NA	NA	NA	NA	0.0315126	NA	0.0777778	0.0238095	NA	0.0222222	NA	0.0208333	0.0453216	2.63766	2.86091	2.75183	3.00564	2.72002	2.73027	2.46021	3.94452	3.59019	4.20409	4.82431	4.9112	0.654793	0.679684	0.73311	0.80036	0.970557	1.37726	0.942746	1.04235
chr4:137864247	chr4	137864247	+	Intron	Ddost	ENSMUSG00000028757	13200	0.666667	0.958222	0.960463	0.973487	0.991453	0.960865	0.962354	0.981806	0.957225	0.986667	0.972166	0.999445	0.996598	0.996136	0.998181	0.999438	0.996743	0.998565	0.998277	1	0.997943	0.999337	4.04491	3.05019	3.09379	3.0632	2.8881	3.57098	7.95898	8.23613	8.25162	8.12518	7.39791	6.99452	0.779279	0.819453	0.641225	0.503629	0.627738	0.724582	1.25264	1.33433
chr4:148492262	chr4	148492262	+	UTR	Dffa	ENSMUSG00000028974	13347	NA	NA	NA	NA	NA	NA	NA	0.111111	NA	NA	0.0833333	0.130952	0.0833333	NA	0.0416667	NA	0.030303	NA	0.111111	0.1	0.14537	0.103175	0.656604	0.93225	0.749933	0.928715	0.78719	0.763764	2.67977	2.04345	1.91177	2.26015	2.01434	2.64193	0.218042	0.184329	0.137219	0.136757	0.203669	0.19404	0.440272	0.335216
chr4:155180406	chr4	155180406	+	Intron	Mrpl20	ENSMUSG00000029066	66448	0.150794	0.122222	0.228846	0.230952	0.339115	0.211601	0.113636	0.234386	0.251282	0.274074	0.352964	0.182828	0.203704	0.530556	0.179894	0.277778	0.388889	0.177778	0.344872	0.305556	0.262037	0.283333	3.15225	3.82718	3.32205	3.96825	3.50145	3.86137	5.86859	7.07251	6.77754	7.246	5.35864	5.75462	0.699494	1.28006	1.37865	1.21992	1.21085	1.40518	4.00644	4.73364
chr4:155180791	chr4	155180791	+	Intron	Mrpl20	ENSMUSG00000029066	66448	NA	0.0185185	NA	0.0175439	NA	NA	0.0144928	NA	0.0208333	0.0138889	NA	0.0238095	NA	NA	NA	0.037037	NA	NA	NA	NA	NA	NA	3.15225	3.82718	3.32205	3.96825	3.50145	3.86137	5.86859	7.07251	6.77754	7.246	5.35864	5.75462	0.699494	1.28006	1.37865	1.21992	1.21085	1.40518	4.00644	4.73364
chr4:155196893	chr4	155196893	+	Intron	Ccnl2	ENSMUSG00000029068	56036	NA	0.0416667	NA	0.0763889	0.0666667	NA	NA	0.037037	NA	0.0333333	NA	0.0416667	0.030303	0.0763889	0.132275	0.047619	NA	0.0666667	0.0555556	NA	0.0666667	0.122222	3.54009	3.35999	3.06756	3.50634	3.08351	3.05829	10.3671	10.3858	11.734	10.761	11.276	10.5073	1.99932	1.71581	1.71603	1.65364	1.50498	1.79157	1.98093	1.98005
chr4:155197024	chr4	155197024	+	Intron	Ccnl2	ENSMUSG00000029068	56036	NA	0.0673401	NA	0.0175439	NA	0.0606061	NA	NA	NA	0.025641	0.0123457	0.0555556	NA	NA	NA	NA	NA	NA	NA	NA	0.0555556	NA	3.54009	3.35999	3.06756	3.50634	3.08351	3.05829	10.3671	10.3858	11.734	10.761	11.276	10.5073	1.99932	1.71581	1.71603	1.65364	1.50498	1.79157	1.98093	1.98005
chr4:21761695	chr4	21761695	+	UTR	Usp45	ENSMUSG00000040455	77593	NA	NA	NA	NA	NA	NA	0.0555556	NA	NA	NA	NA	0.0222222	0.0273478	0.0603435	0.0411889	0.0522914	0.0627946	0.0204082	0.0148148	NA	0.0412196	0.03	2.18659	2.34148	2.07976	2.24595	2.08773	2.03247	5.97374	7.18414	5.73003	8.21191	5.94388	7.0038	0.400894	0.375167	0.337339	0.316283	0.464322	0.460251	0.510198	0.604465
chr4:21761696	chr4	21761696	+	UTR	Usp45	ENSMUSG00000040455	77593	NA	NA	0.037037	NA	NA	NA	NA	0.030303	0.0333333	NA	NA	0.00833333	0.00980392	NA	0.0218379	0.0166667	0.01911	0.00877193	NA	0.0166667	0.0121212	0.00641026	2.18659	2.34148	2.07976	2.24595	2.08773	2.03247	5.97374	7.18414	5.73003	8.21191	5.94388	7.0038	0.400894	0.375167	0.337339	0.316283	0.464322	0.460251	0.510198	0.604465
chr4:21761715	chr4	21761715	+	UTR	Usp45	ENSMUSG00000040455	77593	NA	NA	NA	NA	NA	NA	NA	NA	NA	NA	0.0222222	NA	NA	0.010929	NA	0.0270677	0.00877193	0.0123457	NA	0.0192308	0.00595238	0.00724638	2.18659	2.34148	2.07976	2.24595	2.08773	2.03247	5.97374	7.18414	5.73003	8.21191	5.94388	7.0038	0.400894	0.375167	0.337339	0.316283	0.464322	0.460251	0.510198	0.604465
chr4:21761904	chr4	21761904	+	UTR	Usp45	ENSMUSG00000040455	77593	NA	0.0167609	NA	NA	NA	0.00694444	0.00775194	NA	NA	NA	0.010101	0.0114943	NA	0.0136836	0.0220319	0.0104167	0.0217593	0.00555556	0.0277379	0.034127	0.0070922	0.00546448	2.18659	2.34148	2.07976	2.24595	2.08773	2.03247	5.97374	7.18414	5.73003	8.21191	5.94388	7.0038	0.400894	0.375167	0.337339	0.316283	0.464322	0.460251	0.510198	0.604465
chr4:21761929	chr4	21761929	+	UTR	Usp45	ENSMUSG00000040455	77593	0.00793651	0.0149212	0.0172014	NA	NA	0.00606061	0.0149074	0.0277959	0.00740741	0.00691811	0.00944146	0.00416667	0.0146226	0.0104407	0.0145855	NA	0.00877193	0.0143214	NA	NA	0.00814947	0.0106838	2.18659	2.34148	2.07976	2.24595	2.08773	2.03247	5.97374	7.18414	5.73003	8.21191	5.94388	7.0038	0.400894	0.375167	0.337339	0.316283	0.464322	0.460251	0.510198	0.604465
chr4:21761934	chr4	21761934	+	UTR	Usp45	ENSMUSG00000040455	77593	NA	NA	NA	NA	NA	NA	NA	0.00703683	NA	NA	NA	NA	0.00775194	NA	0.00949157	NA	NA	NA	NA	0.01	0.00438596	0.003663	2.18659	2.34148	2.07976	2.24595	2.08773	2.03247	5.97374	7.18414	5.73003	8.21191	5.94388	7.0038	0.400894	0.375167	0.337339	0.316283	0.464322	0.460251	0.510198	0.604465
chr4:21761952	chr4	21761952	+	UTR	Usp45	ENSMUSG00000040455	77593	0.0047619	0.0208232	0.003367	0.0191098	0.00574713	0.0119963	NA	0.00762431	0.0105628	0.0140423	0.0116718	NA	0.00757576	0.00358423	0.0186619	NA	0.00421941	NA	0.00396825	NA	NA	0.00505051	2.18659	2.34148	2.07976	2.24595	2.08773	2.03247	5.97374	7.18414	5.73003	8.21191	5.94388	7.0038	0.400894	0.375167	0.337339	0.316283	0.464322	0.460251	0.510198	0.604465
chr4:21763697	chr4	21763697	+	UTR	Usp45	ENSMUSG00000040455	77593	NA	0.0222222	NA	NA	NA	NA	0.025641	NA	NA	0.030303	NA	0.0318581	0.00469484	0.0179076	0.0262346	0.00546448	0.0396247	0.0269756	0.0139033	0.015877	0.0295741	0.0284561	2.18659	2.34148	2.07976	2.24595	2.08773	2.03247	5.97374	7.18414	5.73003	8.21191	5.94388	7.0038	0.400894	0.375167	0.337339	0.316283	0.464322	0.460251	0.510198	0.604465
chr4:21763723	chr4	21763723	+	UTR	Usp45	ENSMUSG00000040455	77593	NA	NA	NA	NA	0.047619	NA	NA	NA	NA	NA	NA	0.00628931	NA	0.00740741	NA	0.0162989	0.0247631	0.0138889	NA	0.0108696	0.00877193	0.00793651	2.18659	2.34148	2.07976	2.24595	2.08773	2.03247	5.97374	7.18414	5.73003	8.21191	5.94388	7.0038	0.400894	0.375167	0.337339	0.316283	0.464322	0.460251	0.510198	0.604465
chr4:21763739	chr4	21763739	+	UTR	Usp45	ENSMUSG00000040455	77593	NA	NA	0.0833333	NA	NA	NA	NA	NA	NA	NA	NA	0.00617284	NA	0.00854701	NA	0.0270655	0.0303523	NA	0.0141622	0.0131579	0.00793651	0.00952381	2.18659	2.34148	2.07976	2.24595	2.08773	2.03247	5.97374	7.18414	5.73003	8.21191	5.94388	7.0038	0.400894	0.375167	0.337339	0.316283	0.464322	0.460251	0.510198	0.604465
chr4:8494874	chr4	8494874	+	Intron	Rab2a	ENSMUSG00000047187	59021	NA	NA	0.0238095	NA	NA	0.0104167	NA	0.0666667	NA	0.0333333	NA	NA	NA	NA	NA	0.0833333	NA	NA	0.0833333	NA	NA	NA	4.2156	4.64725	4.92328	4.70159	4.08556	4.55243	5.1877	4.42511	4.97534	2.9788	2.6296	3.27552	1.02685	1.03706	1.06869	1.11129	0.85806	0.837065	2.62747	2.46385
chr4:8534651	chr4	8534651	+	UTR	Rab2a	ENSMUSG00000047187	59021	0.025641	0.039623	0.037037	0.025641	0.0263158	0.0599473	0.0498188	0.0525253	0.0567595	0.0546848	0.0353261	0.0329026	0.0232418	0.0310563	0.0289146	0.0373765	0.0428931	0.0265123	0.0232704	0.0260672	0.0293631	0.0332729	4.2156	4.64725	4.92328	4.70159	4.08556	4.55243	5.1877	4.42511	4.97534	2.9788	2.6296	3.27552	1.02685	1.03706	1.06869	1.11129	0.85806	0.837065	2.62747	2.46385
chr5:107405497	chr5	107405497	+	Intron	Cdc7	ENSMUSG00000029283	12545	NA	0.291667	0.333333	0.133333	NA	0.111111	0.111111	NA	0.0833333	0.179894	0.0555556	NA	NA	0.166667	NA	0.0833333	NA	0.0666667	0.111111	NA	NA	0.114286	2.28093	1.63829	1.70588	2.16973	2.03563	1.91544	9.59353	8.93885	8.57859	8.72022	8.0707	10.9075	0.445075	0.279005	0.229488	0.280522	0.366974	0.600356	0.766443	0.762368
chr5:107405507	chr5	107405507	+	Intron	Cdc7	ENSMUSG00000029283	12545	NA	0.0833333	0.111111	0.0833333	NA	0.0555556	NA	0.15	0.166667	0.292063	NA	0.047619	0.222222	NA	0.305556	NA	0.0833333	0.0666667	0.111111	NA	0.0666667	0.0555556	2.28093	1.63829	1.70588	2.16973	2.03563	1.91544	9.59353	8.93885	8.57859	8.72022	8.0707	10.9075	0.445075	0.279005	0.229488	0.280522	0.366974	0.600356	0.766443	0.762368
chr5:124907998	chr5	124907998	+	Intron	Kmt5a	ENSMUSG00000049327	67956	NA	0.0151515	NA	0.0175439	0.0208333	0.0196078	NA	0.025641	0.025641	0.0151515	NA	0.0333333	0.047619	NA	0.037037	0.0833333	NA	0.0833333	0.025641	0.0217391	NA	0.037037	4.39229	5.2831	4.94454	5.57698	5.44568	5.35298	6.77859	7.55794	8.50914	9.66212	8.59594	10.8758	2.0895	2.7091	2.87322	3.07175	2.94971	3.05968	3.5045	3.84118
chr5:130224632	chr5	130224632	+	UTR	Mrps17	ENSMUSG00000034211	66258	NA	NA	NA	NA	NA	NA	NA	NA	NA	NA	NA	0.416667	0.0666667	NA	0.0833333	0.333333	0.0555556	0.2	0.15873	0.166667	0.114286	0.133333	2.06856	2.68078	2.87321	2.99278	2.80528	2.69762	6.84894	9.96686	9.35797	10.0261	9.63631	11.5045	1.00768	1.62686	1.79728	1.77986	2.25311	3.17176	1.19398	1.08306
chr5:139090604	chr5	139090604	+	Intron	A430033K04Rik	ENSMUSG00000056014	243308	NA	NA	NA	0.333333	0.111111	NA	NA	0.166667	NA	NA	NA	0.111111	NA	NA	0.111111	NA	NA	0.166667	0.0833333	NA	NA	NA	0.826178	0.84612	0.662209	0.916356	0.887084	0.825946	2.9947	2.65962	2.63599	2.18243	1.73359	1.91587	0.292786	0.218069	0.0990776	0.12631	0.188007	0.21156	0.685101	0.483598
chr5:139090608	chr5	139090608	+	Intron	A430033K04Rik	ENSMUSG00000056014	243308	NA	NA	0.111111	NA	0.166667	NA	NA	NA	0.333333	NA	NA	0.25	0.0666667	NA	NA	NA	NA	0.166667	0.0833333	NA	NA	0.166667	0.826178	0.84612	0.662209	0.916356	0.887084	0.825946	2.9947	2.65962	2.63599	2.18243	1.73359	1.91587	0.292786	0.218069	0.0990776	0.12631	0.188007	0.21156	0.685101	0.483598
chr5:139648789	chr5	139648789	+	Intron	Dnaaf5	ENSMUSG00000025857	433956	NA	NA	NA	NA	NA	0.0666667	NA	0.0666667	0.0666667	NA	0.037037	0.333333	NA	NA	0.0666667	NA	0.0666667	NA	NA	NA	0.0833333	0.0833333	3.06372	2.55115	3.21971	3.29069	2.95407	2.66568	3.38903	4.02633	4.3655	3.86323	3.8738	3.303	0.41379	0.492349	0.594645	0.536711	0.687872	0.643111	0.587247	0.39713
chr5:139656759	chr5	139656759	+	Intron	Dnaaf5	ENSMUSG00000025857	433956	NA	NA	NA	NA	0.0555556	NA	NA	0.037037	0.0833333	NA	0.166667	NA	NA	NA	0.333333	NA	0.333333	NA	0.0833333	0.25	NA	NA	3.06372	2.55115	3.21971	3.29069	2.95407	2.66568	3.38903	4.02633	4.3655	3.86323	3.8738	3.303	0.41379	0.492349	0.594645	0.536711	0.687872	0.643111	0.587247	0.39713
chr5:143145189	chr5	143145189	+	UTR	Wipi2	ENSMUSG00000029578	74781	0.0208333	NA	0.00980392	0.0434174	NA	0.0185185	NA	0.038961	0.0308772	NA	NA	0.0130456	0.0110864	0.0127403	0.010515	0.015489	0.00890257	0.00248756	0.0279361	0.0152387	0.0155039	0.0195872	2.97148	3.47713	3.42435	3.1068	3.19331	2.96293	11.5348	11.93	11.0112	11.8193	12.029	8.87987	0.782988	0.990136	1.1148	1.02692	0.797639	0.643364	1.60561	1.78028
chr5:143145190	chr5	143145190	+	UTR	Wipi2	ENSMUSG00000029578	74781	0.0222222	NA	NA	0.0784314	NA	0.0185185	NA	NA	0.0175439	NA	NA	0.00320513	0.00861259	0.005062	0.0127781	0.00584795	0.00330033	0.0126263	0.0149022	0.00490196	0.00771357	0.0119048	2.97148	3.47713	3.42435	3.1068	3.19331	2.96293	11.5348	11.93	11.0112	11.8193	12.029	8.87987	0.782988	0.990136	1.1148	1.02692	0.797639	0.643364	1.60561	1.78028
chr5:143145215	chr5	143145215	+	UTR	Wipi2	ENSMUSG00000029578	74781	NA	NA	NA	NA	NA	0.015873	NA	NA	NA	NA	0.0666667	0.0136618	0.00603627	0.00347222	0.00596951	0.0111189	0.00628319	0.0161164	0.0055789	NA	0.00980392	0.0173399	2.97148	3.47713	3.42435	3.1068	3.19331	2.96293	11.5348	11.93	11.0112	11.8193	12.029	8.87987	0.782988	0.990136	1.1148	1.02692	0.797639	0.643364	1.60561	1.78028
chr5:143145246	chr5	143145246	+	UTR	Wipi2	ENSMUSG00000029578	74781	NA	NA	NA	NA	0.0555556	NA	NA	NA	NA	NA	NA	0.00497512	NA	0.0102109	NA	0.00729142	NA	0.00725309	NA	NA	0.0042735	NA	2.97148	3.47713	3.42435	3.1068	3.19331	2.96293	11.5348	11.93	11.0112	11.8193	12.029	8.87987	0.782988	0.990136	1.1148	1.02692	0.797639	0.643364	1.60561	1.78028
chr5:145999366	chr5	145999366	+	Intron	Zfp655	ENSMUSG00000007812	72611	0.0238095	0.00900901	0.00666667	0.00546448	0.00925926	NA	NA	0.0268384	0.0107527	0.0196078	NA	NA	NA	NA	NA	NA	NA	0.025641	NA	0.10101	0.0238095	NA	4.47142	4.90915	4.72038	4.71099	5.10832	4.22228	11.1838	11.6118	13.5795	12.7518	9.83907	11.3633	1.03115	1.51005	1.77662	1.95934	1.24219	1.60482	1.34644	2.24237
chr5:146000039	chr5	146000039	+	Intron	Zfp655	ENSMUSG00000007812	72611	NA	NA	0.0144928	0.0441919	NA	NA	NA	0.0360624	0.0208333	0.0277778	0.030303	NA	NA	0.0833333	0.0666667	NA	0.166667	NA	NA	0.125	NA	NA	4.47142	4.90915	4.72038	4.71099	5.10832	4.22228	11.1838	11.6118	13.5795	12.7518	9.83907	11.3633	1.03115	1.51005	1.77662	1.95934	1.24219	1.60482	1.34644	2.24237
chr5:146000048	chr5	146000048	+	Intron	Zfp655	ENSMUSG00000007812	72611	0.0416667	NA	NA	0.0922306	0.0673401	NA	NA	0.0418301	0.0499109	0.0447958	0.033179	NA	0.208333	0.111111	0.0416667	0.0833333	0.111111	NA	NA	0.1	NA	NA	4.47142	4.90915	4.72038	4.71099	5.10832	4.22228	11.1838	11.6118	13.5795	12.7518	9.83907	11.3633	1.03115	1.51005	1.77662	1.95934	1.24219	1.60482	1.34644	2.24237
chr5:147212420	chr5	147212420	+	Intron	Wasf3	ENSMUSG00000029636	245880	0.166667	NA	0.111111	NA	NA	0.047619	NA	0.15873	0.0833333	NA	NA	NA	NA	NA	NA	NA	0.333333	NA	0.333333	NA	NA	NA	2.94325	2.07941	2.2599	2.33281	2.20437	2.11058	4.65564	7.47568	4.12756	8.02038	7.39572	8.22211	0.231668	0.186786	0.202735	0.22374	0.362424	0.330559	0.335526	0.282285
chr5:22971122	chr5	22971122	+	Intron	Kmt2e	ENSMUSG00000029004	69188	NA	NA	0.031746	0.0416667	NA	NA	NA	NA	0.0222222	0.00757576	0.133333	0.0666667	NA	NA	NA	NA	0.111111	NA	0.047619	NA	NA	0.047619	6.80595	5.78681	5.46778	6.1961	5.96513	6.14578	6.79179	5.22596	5.7405	5.72954	4.32768	4.0995	1.27245	0.986029	0.906507	0.938588	0.733258	0.768659	2.46518	2.53339
chr5:29779671	chr5	29779671	+	UTR	Nom1	ENSMUSG00000001569	433864	NA	NA	0.107226	0.0969697	0.0444444	0.047619	0.154762	0.0277778	0.157407	0.0740741	0.0634921	0.141414	0.212963	0.188034	0.146916	0.235165	0.0512821	0.0208333	0.194444	0.05	0.0858586	0.149471	3.17468	3.21496	3.58451	3.6797	3.85042	3.61353	7.81503	8.83335	8.782	8.33886	8.91622	11.1215	1.03527	1.32278	1.48952	1.59101	1.58907	1.55354	1.41488	1.56693
chr5:31368868	chr5	31368868	+	Intron	Cad	ENSMUSG00000013629	69719	NA	NA	NA	NA	NA	NA	NA	NA	0.025641	NA	0.0222222	NA	0.0416667	0.037037	NA	0.0416667	0.116162	0.047619	0.0333333	0.194444	NA	0.0589744	5.71472	5.73723	6.04703	6.47068	5.57114	6.10728	10.0227	13.5588	13.6193	11.0655	12.7003	13.9444	0.725624	1.06551	1.32703	1.20188	1.59522	1.55061	1.86385	2.5395
chr5:33221993	chr5	33221993	+	Intron	Depdc5	ENSMUSG00000037426	277854	0.333333	NA	0.222222	NA	NA	0.277778	0.0833333	NA	0.0833333	0.333333	NA	NA	0.111111	NA	NA	NA	NA	NA	0.333333	NA	NA	0.333333	0.50129	0.6915	0.782231	0.88345	0.676466	1.01815	1.66357	1.21455	1.49174	1.74633	1.70502	2.25565	0.277645	0.22446	0.204818	0.177141	0.221956	0.236081	1.30459	1.51232
chr5:33237084	chr5	33237084	+	Intron	Depdc5	ENSMUSG00000037426	277854	NA	NA	NA	0.222222	NA	NA	NA	NA	0.166667	NA	NA	NA	0.333333	0.333333	0.333333	NA	0.333333	NA	NA	NA	NA	NA	0.50129	0.6915	0.782231	0.88345	0.676466	1.01815	1.66357	1.21455	1.49174	1.74633	1.70502	2.25565	0.277645	0.22446	0.204818	0.177141	0.221956	0.236081	1.30459	1.51232
chr5:33334876	chr5	33334876	+	UTR	Depdc5	ENSMUSG00000037426	277854	NA	NA	0.0070922	NA	NA	0.00547345	0.00311526	0.011597	0.00653595	0.00767196	0.00444699	NA	NA	NA	0.0100601	NA	NA	NA	0.00793651	NA	0.0035461	NA	0.50129	0.6915	0.782231	0.88345	0.676466	1.01815	1.66357	1.21455	1.49174	1.74633	1.70502	2.25565	0.277645	0.22446	0.204818	0.177141	0.221956	0.236081	1.30459	1.51232
chr5:33709781	chr5	33709781	+	Intron	Maea	ENSMUSG00000079562	59003	0.047619	0.0238095	0.0277778	0.0222222	0.0416667	0.0416667	NA	0.0416667	NA	0.111111	0.0208333	NA	NA	NA	NA	NA	NA	NA	NA	NA	0.111111	0.111111	3.18939	2.47492	2.42261	2.90388	2.56967	2.07344	9.22743	5.86804	7.48383	7.14607	4.55681	5.29264	1.13566	0.956527	0.993108	1.00374	0.935285	0.886311	1.99916	1.71662
chr5:33758004	chr5	33758004	+	UTR	Uvssa	ENSMUSG00000037355	71101	0.3	0.0952381	NA	0.0833333	0.0555556	NA	0.361111	0.188889	0.222222	0.0416667	0.220238	0.0238095	0.0238095	NA	NA	NA	NA	0.0833333	0.0464744	NA	0.047619	NA	2.28465	1.86242	1.76458	1.97464	2.12465	1.53119	11.954	10.903	10.9084	10.2164	9.42658	10.3819	0.214884	0.188785	0.180098	0.157445	0.240751	0.180879	0.312218	0.255237
chr5:33758042	chr5	33758042	+	UTR	Uvssa	ENSMUSG00000037355	71101	0.0164642	0.0268096	0.00939591	0.0232511	0.0217284	0.0113729	0.0249944	0.0211362	0.0185518	NA	0.00847937	0.00757576	0.00641026	NA	0.00606061	0.00757576	0.0268519	NA	0.0117047	0.0142857	0.00546448	0.0211594	2.28465	1.86242	1.76458	1.97464	2.12465	1.53119	11.954	10.903	10.9084	10.2164	9.42658	10.3819	0.214884	0.188785	0.180098	0.157445	0.240751	0.180879	0.312218	0.255237
chr5:33758050	chr5	33758050	+	UTR	Uvssa	ENSMUSG00000037355	71101	0.00228311	0.00582359	0.00526316	0.0017452	0.0115683	0.00340171	0.00409986	0.0078005	0.00532206	0.00484906	0.00596842	0.00564972	0.00584795	NA	0.00546448	0.00595238	0.00775194	0.00392157	0.00396825	NA	0.00564972	0.00628931	2.28465	1.86242	1.76458	1.97464	2.12465	1.53119	11.954	10.903	10.9084	10.2164	9.42658	10.3819	0.214884	0.188785	0.180098	0.157445	0.240751	0.180879	0.312218	0.255237
chr5:33758056	chr5	33758056	+	UTR	Uvssa	ENSMUSG00000037355	71101	NA	0.00314465	0.00421465	0.00804473	0.00674164	0.00161031	0.00731634	0.00140056	0.00578925	0.00359807	0.0045979	0.00564972	0.0121373	NA	0.00529101	NA	0.00680272	0.0111953	NA	NA	0.00497512	0.00574713	2.28465	1.86242	1.76458	1.97464	2.12465	1.53119	11.954	10.903	10.9084	10.2164	9.42658	10.3819	0.214884	0.188785	0.180098	0.157445	0.240751	0.180879	0.312218	0.255237
chr5:33758586	chr5	33758586	+	UTR	Uvssa	ENSMUSG00000037355	71101	NA	NA	0.111111	NA	NA	NA	NA	NA	NA	NA	0.047619	0.0648148	0.0277778	0.0769231	NA	0.0740741	0.111111	NA	NA	NA	0.136752	0.0939394	2.28465	1.86242	1.76458	1.97464	2.12465	1.53119	11.954	10.903	10.9084	10.2164	9.42658	10.3819	0.214884	0.188785	0.180098	0.157445	0.240751	0.180879	0.312218	0.255237
chr5:33759205	chr5	33759205	+	UTR	Uvssa	ENSMUSG00000037355	71101	NA	NA	NA	0.166667	NA	NA	0.0833333	NA	NA	NA	NA	NA	0.0666667	NA	NA	0.030303	0.030303	0.0939394	0.030303	NA	NA	NA	2.28465	1.86242	1.76458	1.97464	2.12465	1.53119	11.954	10.903	10.9084	10.2164	9.42658	10.3819	0.214884	0.188785	0.180098	0.157445	0.240751	0.180879	0.312218	0.255237
chr5:33760959	chr5	33760959	+	UTR	Uvssa	ENSMUSG00000037355	71101	NA	NA	NA	NA	NA	NA	NA	NA	NA	0.0555556	0.111111	NA	NA	0.0175439	0.0208333	NA	0.0666667	NA	NA	0.0833333	0.0277778	0.0222222	2.28465	1.86242	1.76458	1.97464	2.12465	1.53119	11.954	10.903	10.9084	10.2164	9.42658	10.3819	0.214884	0.188785	0.180098	0.157445	0.240751	0.180879	0.312218	0.255237
chr5:36344940	chr5	36344940	+	UTR	Afap1	ENSMUSG00000029094	70292	NA	0.0353261	NA	NA	NA	0.0104167	NA	0.0566449	NA	0.0437276	0.0320366	0.037037	NA	NA	NA	0.0555556	0.0151515	0.0175439	0.0175439	0.0416667	0.0222222	0.030303	4.20795	2.53828	2.1609	2.57843	2.17608	2.14237	8.51282	6.71628	6.97842	6.14663	5.53053	5.07704	0.40531	0.343408	0.320895	0.203337	0.239715	0.219537	0.726926	0.524483
chr5:36344942	chr5	36344942	+	UTR	Afap1	ENSMUSG00000029094	70292	NA	NA	NA	NA	NA	0.0196078	NA	0.015873	NA	0.0185185	0.0111111	NA	NA	NA	NA	NA	0.0128205	0.0133333	NA	NA	NA	NA	4.20795	2.53828	2.1609	2.57843	2.17608	2.14237	8.51282	6.71628	6.97842	6.14663	5.53053	5.07704	0.40531	0.343408	0.320895	0.203337	0.239715	0.219537	0.726926	0.524483
chr5:81628696	chr5	81628696	+	Intron	Adgrl3	ENSMUSG00000037605	319387	NA	NA	NA	NA	0.0333333	NA	NA	0.0222222	0.037037	0.0666667	NA	NA	NA	NA	NA	0.111111	NA	0.0555556	NA	NA	NA	NA	2.64886	2.63475	2.72474	3.30458	2.65485	3.05659	4.95081	4.40963	4.22457	4.06942	5.04536	5.08617	0.491393	0.45307	0.435889	0.497959	0.469683	0.505762	0.361796	0.302483
chr5:81754274	chr5	81754274	+	Intron	Adgrl3	ENSMUSG00000037605	319387	NA	NA	NA	NA	NA	0.0208333	NA	0.030303	0.0238095	NA	0.030303	NA	NA	NA	0.025641	0.0555556	NA	NA	NA	NA	NA	NA	2.64886	2.63475	2.72474	3.30458	2.65485	3.05659	4.95081	4.40963	4.22457	4.06942	5.04536	5.08617	0.491393	0.45307	0.435889	0.497959	0.469683	0.505762	0.361796	0.302483
chr5:93542436	chr5	93542436	+	Intron	2011-09-01	ENSMUSG00000058013	52398	NA	0.0151515	0.0411594	0.0185185	NA	0.015873	NA	0.03367	0.0333333	NA	NA	NA	NA	NA	NA	NA	NA	NA	NA	NA	NA	NA	6.61024	6.39862	6.51332	6.27959	6.17813	7.1364	16.8353	14.7197	11.3584	14.6203	15.4376	14.7194	2.05259	2.10565	2.29603	2.26427	1.7416	1.55051	3.90499	3.56581
chr5:96656979	chr5	96656979	+	Intron	Mrpl1	ENSMUSG00000029486	94061	NA	NA	NA	0.0925926	NA	0.0555556	NA	0.0555556	0.111111	NA	NA	0.0555556	NA	NA	0.111111	NA	NA	NA	NA	NA	NA	NA	3.78355	3.35955	3.51149	3.36907	3.39043	3.58944	5.23387	7.50059	6.72425	8.23549	6.02732	7.85006	0.356134	0.414465	0.359595	0.403058	0.354904	0.415514	0.752951	0.870418
chr6:108320209	chr6	108320209	+	Intron	Itpr1	ENSMUSG00000030102	16438	0.222222	0.333333	0.333333	0.833333	0.507937	0.766667	0.805556	0.888889	0.916667	0.333333	0.833333	NA	0.666667	0.166667	0.666667	NA	0.333333	0.5	NA	NA	0.333333	0.333333	4.23627	4.29143	3.93446	4.52245	3.57638	4.01893	9.26373	9.27333	8.77544	9.54881	10.2748	10.4683	0.138404	0.158711	0.146543	0.157555	0.188672	0.168814	0.0606582	0.112438
chr6:11960034	chr6	11960034	+	Intron	Phf14	ENSMUSG00000029629	75725	0.00999162	0.00348642	0.0109271	0.00653013	0.0203438	0.00612368	0.0202293	0.0115861	0.0069983	0.00552838	0.0104064	0.0100164	0.00617496	0.00647249	0.00607181	NA	0.00406504	0.0047619	0.00522098	0.0114943	NA	0.0120126	1.16957	0.898501	1.0537	0.71452	0.9433	1.06979	6.94383	4.71882	4.12208	4.96222	4.09128	5.4102	0.448623	0.335135	0.329479	0.31478	0.282471	0.3798	0.427661	0.272749
chr6:11960047	chr6	11960047	+	Intron	Phf14	ENSMUSG00000029629	75725	0.00643355	0.00839582	0.00931412	0.0154008	0.00671793	0.0119992	0.00977328	0.00939468	0.0124411	0.00901319	0.0121348	NA	0.00200803	0.00999404	NA	0.00226757	0.0018018	0.00660066	0.00368077	0.0128219	0.0133705	0.00234742	1.16957	0.898501	1.0537	0.71452	0.9433	1.06979	6.94383	4.71882	4.12208	4.96222	4.09128	5.4102	0.448623	0.335135	0.329479	0.31478	0.282471	0.3798	0.427661	0.272749
chr6:122833401	chr6	122833401	+	Intron	Necap1	ENSMUSG00000030327	67602	NA	0.047619	NA	0.0555556	NA	NA	NA	0.111111	NA	NA	NA	0.333333	NA	NA	NA	NA	0.111111	NA	NA	0.166667	NA	NA	2.29789	2.62624	3.1476	3.02712	3.05475	2.8394	6.03221	6.08732	7.02839	6.55521	6.20539	6.26009	0.895172	0.892103	1.08543	0.975582	1.16225	0.967855	1.2643	1.16934
chr6:122836095	chr6	122836095	+	Intron	Necap1	ENSMUSG00000030327	67602	0.111111	NA	NA	NA	0.0416667	NA	NA	NA	NA	NA	0.0555556	0.333333	NA	NA	NA	0.166667	NA	NA	0.277778	NA	NA	NA	2.29789	2.62624	3.1476	3.02712	3.05475	2.8394	6.03221	6.08732	7.02839	6.55521	6.20539	6.26009	0.895172	0.892103	1.08543	0.975582	1.16225	0.967855	1.2643	1.16934
chr6:122836188	chr6	122836188	+	Intron	Necap1	ENSMUSG00000030327	67602	0.222222	NA	NA	0.0185185	NA	0.025641	NA	NA	NA	0.0238095	NA	0.111111	NA	NA	NA	0.0833333	NA	NA	NA	0.25	NA	NA	2.29789	2.62624	3.1476	3.02712	3.05475	2.8394	6.03221	6.08732	7.02839	6.55521	6.20539	6.26009	0.895172	0.892103	1.08543	0.975582	1.16225	0.967855	1.2643	1.16934
chr6:125088816	chr6	125088816	+	Intron	Nop2	ENSMUSG00000038279	110109	NA	0.0144928	NA	NA	NA	NA	NA	0.00793651	NA	NA	NA	0.00813008	0.0254274	0.070216	0.0354386	NA	0.0695885	0.0197386	0.0394737	0.0217391	0.0774298	0.0696401	9.02514	8.05818	7.35176	8.30757	7.38061	7.60814	11.9817	14.3017	13.1201	14.2382	14.4078	13.4189	1.81178	3.00476	3.11436	3.32148	3.29656	3.1111	4.22576	4.42759
chr6:149264393	chr6	149264393	+	Intron	2810474O19Rik	ENSMUSG00000032712	67246	NA	NA	0.0133333	0.0331622	0.00757576	NA	0.00813008	0.0107527	NA	NA	NA	0.0318182	0.0185185	NA	NA	NA	NA	NA	0.0166667	NA	NA	NA	2.98325	2.94563	2.57851	2.40209	2.0652	2.93173	15.7724	11.3049	11.7115	10.0132	12.2675	11.7906	1.97306	1.6147	1.32707	1.28043	2.01149	1.99455	2.40881	2.18439
chr6:149283780	chr6	149283780	+	UTR	2810474O19Rik	ENSMUSG00000032712	67246	NA	NA	NA	NA	NA	NA	0.00775194	NA	0.00877193	NA	0.00584795	0.001287	NA	NA	NA	NA	NA	0.0026455	0.00176367	NA	0.00394477	NA	2.98325	2.94563	2.57851	2.40209	2.0652	2.93173	15.7724	11.3049	11.7115	10.0132	12.2675	11.7906	1.97306	1.6147	1.32707	1.28043	2.01149	1.99455	2.40881	2.18439
chr6:38396924	chr6	38396924	+	Intron	Ubn2	ENSMUSG00000038538	320538	0.0196078	0.0666667	NA	0.0555556	NA	NA	0.0416667	NA	NA	0.0793651	NA	NA	NA	NA	0.111111	NA	0.0555556	NA	NA	NA	NA	NA	3.81758	3.40351	3.20419	3.87926	3.58069	3.32898	7.27131	4.47719	7.01577	6.72376	6.42258	6.05271	0.524844	0.466295	0.455888	0.467402	0.523088	0.537197	0.832948	0.604246
chr6:47821724	chr6	47821724	+	intergenic	Zfp398	ENSMUSG00000062519	272347	NA	NA	NA	0.0333333	NA	NA	0.133333	0.111111	NA	0.166667	NA	0.171717	NA	0.166667	0.0952381	0.0666667	0.111111	0.0952381	0.0888889	0.166667	0.2	0.116162	2.17838	2.34833	2.35636	3.05493	2.63484	2.63983	4.66889	4.6745	5.92322	5.40215	4.47894	2.94244	0.231551	0.257658	0.24091	0.233774	0.25881	0.254365	0.811201	0.582438
chr6:67225242	chr6	67225242	+	Intron	Serbp1	ENSMUSG00000036371	66870	0.0260641	0.0170112	0.0147976	0.0297868	0.0376224	0.0157609	0.0272424	0.0416768	0.0439784	0.0119048	0.00849392	0.238095	0.111111	0.0185185	0.0141844	0.0515873	0.015873	NA	0.0196078	0.27381	0.0612745	0.0625	15.1208	16.2552	15.5178	17.6405	14.9146	16.5406	13.0192	12.2644	13.0001	13.403	14.2206	14.7034	2.80345	3.4259	3.62546	4.46844	4.31585	4.76714	3.53978	4.97856
chr6:67225280	chr6	67225280	+	Intron	Serbp1	ENSMUSG00000036371	66870	NA	NA	0.00362319	NA	0.00480342	NA	NA	0.00160256	0.00453515	NA	NA	NA	NA	0.00793651	NA	NA	NA	0.015873	0.0111111	NA	0.015873	0.0252955	15.1208	16.2552	15.5178	17.6405	14.9146	16.5406	13.0192	12.2644	13.0001	13.403	14.2206	14.7034	2.80345	3.4259	3.62546	4.46844	4.31585	4.76714	3.53978	4.97856
chr6:86364934	chr6	86364934	+	Exon	Tia1	ENSMUSG00000071337	21841	NA	NA	NA	NA	NA	NA	NA	NA	NA	NA	0.113636	0.0666667	NA	0.047619	NA	NA	0.0833333	NA	0.0833333	0.166667	NA	NA	4.56788	4.53021	4.38201	4.40811	4.02812	3.81515	13.0978	11.1463	11.1868	11.4863	7.65023	10.6051	1.00216	0.617103	0.689467	0.651728	0.699342	0.887812	1.30936	0.93143
chr6:86366050	chr6	86366050	+	Exon	Tia1	ENSMUSG00000071337	21841	0.0123457	0.0244834	0.0747368	0.0446078	NA	0.0142162	0.00833333	0.0199936	NA	0.0070922	0.0116336	NA	NA	NA	NA	NA	NA	NA	0.0133333	NA	NA	0.0238095	4.56788	4.53021	4.38201	4.40811	4.02812	3.81515	13.0978	11.1463	11.1868	11.4863	7.65023	10.6051	1.00216	0.617103	0.689467	0.651728	0.699342	0.887812	1.30936	0.93143
chr6:86366057	chr6	86366057	+	Exon	Tia1	ENSMUSG00000071337	21841	0.0628655	0.0525253	0.0648148	0.0713587	0.132784	0.020903	0.127525	0.0689855	0.111977	0.0883761	0.101852	NA	NA	NA	0.0222222	NA	0.0666667	0.025641	NA	NA	0.0416667	NA	4.56788	4.53021	4.38201	4.40811	4.02812	3.81515	13.0978	11.1463	11.1868	11.4863	7.65023	10.6051	1.00216	0.617103	0.689467	0.651728	0.699342	0.887812	1.30936	0.93143
chr7:104246977	chr7	104246977	+	Intron	Gab2	ENSMUSG00000004508	14389	NA	0.0555556	0.166667	0.416667	0.444444	0.333333	0.166667	0.5	NA	0.5	0.333333	0.666667	0.333333	0.5	NA	0.5	0.361111	NA	NA	NA	NA	0.166667	0.945596	0.550851	0.815598	0.652204	0.840669	0.682093	0.650046	0.687244	0.610097	0.949319	0.314281	0.291277	0.0824306	0.0776437	0.0739531	0.0759277	0.0575261	0.0691531	0.513255	0.313854
chr7:104852183	chr7	104852183	+	Intron	Clns1a	ENSMUSG00000025439	12729	NA	NA	0.0277778	0.0478632	NA	0.0266667	0.0444444	0.0347594	NA	NA	NA	NA	NA	NA	NA	NA	NA	0.0833333	0.0833333	NA	NA	0.111111	6.53361	6.07579	5.70519	6.48965	5.96473	6.20848	4.71223	6.03134	6.63806	6.59246	6.50061	7.07885	0.54995	0.669439	0.690313	0.776763	0.811556	0.795638	0.745518	0.851761
chr7:104852189	chr7	104852189	+	Intron	Clns1a	ENSMUSG00000025439	12729	NA	NA	0.0238095	0.0380952	NA	NA	0.0404412	0.0289855	NA	NA	NA	NA	0.333333	NA	0.108974	NA	NA	0.0555556	0.166667	NA	NA	NA	6.53361	6.07579	5.70519	6.48965	5.96473	6.20848	4.71223	6.03134	6.63806	6.59246	6.50061	7.07885	0.54995	0.669439	0.690313	0.776763	0.811556	0.795638	0.745518	0.851761
chr7:128072022	chr7	128072022	+	Exon	Polr3e	ENSMUSG00000030880	26939	0.0416667	0.031746	0.0485313	NA	0.0729988	0.0509259	0.0138889	0.0344828	0.0114943	NA	0.0144928	0.0747524	0.0453316	0.0424722	0.063036	0.0661376	0.0542633	0.0222794	0.0286003	0.0522401	0.0398899	0.0460619	4.82548	3.93184	3.91547	4.15869	3.82336	4.26261	5.40925	6.51415	5.37914	6.9085	7.44361	7.22408	0.768154	0.971775	1.07652	1.00797	1.22235	1.1131	1.17409	1.10766
chr7:128073634	chr7	128073634	+	Intron	Polr3e	ENSMUSG00000030880	26939	NA	0.0833333	0.2	0.4	0.111111	0.166667	0.0666667	0.0833333	0.177778	0.111111	0.166667	NA	0.166667	NA	NA	NA	NA	NA	0.133333	NA	0.333333	0.111111	4.82548	3.93184	3.91547	4.15869	3.82336	4.26261	5.40925	6.51415	5.37914	6.9085	7.44361	7.22408	0.768154	0.971775	1.07652	1.00797	1.22235	1.1131	1.17409	1.10766
chr7:13557536	chr7	13557536	+	UTR	Zfp324	ENSMUSG00000004500	243834	0.111111	NA	NA	NA	NA	NA	NA	NA	NA	NA	NA	NA	0.133333	NA	0.0833333	NA	NA	0.047619	0.151323	0.0714286	NA	NA	1.56993	1.41399	1.5558	1.7295	1.40525	1.5414	5.16341	5.71551	4.37096	4.40443	3.56626	4.65517	0.449966	0.395534	0.237931	0.276652	0.361813	0.404889	1.42432	1.14967
chr7:13557541	chr7	13557541	+	UTR	Zfp324	ENSMUSG00000004500	243834	0.111111	NA	NA	NA	NA	NA	NA	NA	NA	NA	NA	0.0666667	0.0666667	0.0862471	0.0833333	0.0833333	0.122222	0.15	0.128571	NA	0.133333	0.0833333	1.56993	1.41399	1.5558	1.7295	1.40525	1.5414	5.16341	5.71551	4.37096	4.40443	3.56626	4.65517	0.449966	0.395534	0.237931	0.276652	0.361813	0.404889	1.42432	1.14967
chr7:30789025	chr7	30789025	+	Intron	Zfp568	ENSMUSG00000074221	243905	NA	0.0166667	0.010101	NA	NA	0.0128205	0.0763889	NA	0.0277778	0.0111111	0.0138889	NA	NA	NA	NA	NA	NA	NA	NA	NA	NA	0.0666667	5.07342	5.12878	4.73057	5.46028	4.90507	4.82508	14.8538	14.5373	15.3589	18.2795	14.1008	15.3042	0.848881	0.97683	1.15553	1.05637	0.942112	0.936347	1.39153	1.1774
chr7:57055169	chr7	57055169	+	Intron	Prmt3	ENSMUSG00000030505	71974	NA	NA	0.0555556	NA	NA	0.0589744	NA	NA	0.030303	NA	0.0333333	0.111111	NA	NA	0.0555556	NA	NA	NA	NA	0.166667	0.0833333	NA	5.60166	4.5294	4.88429	4.69401	3.96171	4.58488	5.25758	5.76943	6.31649	5.22112	4.48032	5.51897	0.393533	0.497993	0.487798	0.555844	0.612601	0.659359	0.307453	0.502616
chr7:6142910	chr7	6142910	+	UTR	Zfp444	ENSMUSG00000044876	72667	0.111111	NA	0.583333	0.166667	0.5	0.472222	0.777778	0.361111	0.166667	0.277778	0.0833333	0.166667	NA	0.133333	0.583333	0.111111	0.555556	NA	0.333333	0.25	NA	0.166667	4.53748	4.10257	3.91293	3.85045	4.12926	4.10974	2.92904	1.74941	2.45336	2.16757	2.51907	2.37264	0.553806	0.654388	0.59518	0.547446	0.729165	0.863939	0.62482	0.546339
chr8:106784772	chr8	106784772	+	Intron	Cklf	ENSMUSG00000054400	75458	NA	NA	0.15873	NA	NA	NA	NA	NA	NA	0.333333	NA	0.0833333	NA	0.0833333	NA	0.333333	0.0833333	NA	0.111111	NA	NA	NA	1.33771	1.32745	1.13464	1.11194	1.2097	0.974324	6.23466	4.3218	4.09769	3.85662	3.19569	4.27538	0.20671	0.0911754	0.122252	0.174555	0.109592	0.163004	0.727852	0.743606
chr8:109423810	chr8	109423810	+	Intron	Utp4	ENSMUSG00000041438	21771	NA	NA	NA	0.047619	0.0787037	NA	NA	NA	NA	NA	NA	NA	NA	NA	0.111111	0.0666667	NA	0.444444	0.0833333	NA	NA	NA	7.40417	8.60396	8.81029	9.62831	8.62787	8.96437	5.9341	9.47355	10.0143	9.98467	9.12321	11.0156	0.967851	1.81542	2.19542	2.27054	2.11494	2.14072	1.0946	1.76229
chr8:109435471	chr8	109435471	+	Intron	Utp4	ENSMUSG00000041438	21771	NA	NA	NA	0.030303	NA	0.0128205	0.0555556	0.047619	0.047619	NA	NA	NA	0.0555556	NA	0.0333333	0.037037	NA	0.0416667	0.0333333	NA	0.0589744	0.0555556	7.40417	8.60396	8.81029	9.62831	8.62787	8.96437	5.9341	9.47355	10.0143	9.98467	9.12321	11.0156	0.967851	1.81542	2.19542	2.27054	2.11494	2.14072	1.0946	1.76229
chr8:109435787	chr8	109435787	+	Intron	Utp4	ENSMUSG00000041438	21771	0.111111	0.047619	0.05	0.0166667	0.0515873	0.0625	0.0537037	0.0693713	0.0527778	0.031746	0.0229885	0.166667	0.166667	0.218254	0.0151515	0.177778	0.0740741	0.108333	0.0430556	0.0909091	0.0833333	0.155952	7.40417	8.60396	8.81029	9.62831	8.62787	8.96437	5.9341	9.47355	10.0143	9.98467	9.12321	11.0156	0.967851	1.81542	2.19542	2.27054	2.11494	2.14072	1.0946	1.76229
chr8:109695023	chr8	109695023	+	Intron	Cyb5b	ENSMUSG00000031924	66427	NA	0.0277778	NA	0.0444444	0.0238095	0.0444444	NA	NA	0.0222222	NA	NA	NA	NA	NA	NA	NA	0.0666667	NA	NA	NA	0.333333	NA	3.43243	3.61659	3.75858	4.41838	4.25317	3.68479	6.56851	6.83892	7.74764	6.70875	6.24956	8.0386	0.962528	1.25079	1.27783	1.27557	1.23493	1.40945	2.18876	2.49147
chr8:114066787	chr8	114066787	+	Intron	Znrf1	ENSMUSG00000033545	170737	NA	NA	NA	0.037037	0.037037	NA	0.166667	0.047619	NA	0.111111	NA	NA	NA	NA	NA	NA	NA	0.166667	NA	NA	NA	NA	2.62758	2.3602	2.22791	2.41691	2.41349	2.08109	3.6379	3.43066	3.34157	3.13169	3.0576	2.58753	0.58428	0.554856	0.473864	0.483821	0.437457	0.495001	1.10948	1.04002
chr8:129637700	chr8	129637700	+	Intron	Pard3	ENSMUSG00000025812	93742	NA	0.0555556	NA	0.122222	0.0416667	NA	NA	0.25	0.0833333	0.111111	0.0416667	0.333333	NA	0.111111	NA	NA	0.111111	NA	0.222222	NA	0.166667	NA	3.05499	3.32124	3.16949	3.10307	2.84535	3.28421	4.57629	4.75193	4.0765	3.62112	5.52929	7.22603	0.277858	0.311102	0.30858	0.297226	0.334453	0.341333	0.196949	0.378719
chr8:131231963	chr8	131231963	+	Intron	Itgb1	ENSMUSG00000025809	16412	NA	0.0312629	0.00952381	NA	0.0144994	NA	NA	0.0107527	0.0298895	0.0294486	0.00925926	NA	NA	0.0238095	NA	NA	0.103704	NA	0.0416667	0.0555556	0.15	0.0666667	5.14587	5.53919	5.32621	5.66677	5.67748	5.36039	13.7379	13.6927	14.608	15.5113	9.59131	9.76541	1.59339	1.98034	2.22336	2.54686	1.3986	1.39572	1.67037	2.13534
chr8:13347978	chr8	13347978	+	Intron	Tfdp1	ENSMUSG00000038482	21781	NA	0.0107527	0.0151515	NA	NA	NA	0.0138889	0.0256769	NA	NA	NA	NA	NA	NA	0.103704	NA	0.0929487	NA	0.0555556	NA	0.0833333	0.0833333	7.01557	8.5951	8.99043	11.0329	8.70685	9.63705	2.92718	3.89281	3.17017	4.20922	4.49501	4.6687	1.94113	2.4845	2.99787	2.83305	3.18667	3.43196	2.20673	2.13219
chr8:26906749	chr8	26906749	+	Intron	Lsm1	ENSMUSG00000037296	67207	0.0692063	0.0743386	0.0530138	0.0713085	0.0386354	0.0526455	0.105369	0.121202	0.105051	0.0874223	0.0685814	0.0404762	0.0333333	0.0561594	0.0742857	0.0333333	0.047619	0.138889	0.0342105	NA	0.0740741	0.0784314	2.95668	4.11759	4.28155	4.22388	4.83035	4.43347	3.34182	5.3362	5.70497	4.50283	4.15969	4.31728	0.564345	0.75285	0.739756	0.854062	0.641743	0.74886	1.1071	1.51778
chr8:3538384	chr8	3538384	+	Intron	Pnpla6	ENSMUSG00000004565	50767	NA	0.047619	NA	NA	0.166667	0.0833333	NA	NA	NA	NA	NA	NA	NA	0.15	NA	0.122222	NA	NA	0.166667	NA	NA	NA	3.85277	3.08286	2.44925	3.20331	2.80835	3.03649	8.80721	5.81351	5.22322	4.82648	6.99002	7.83049	0.589236	0.367162	0.302409	0.194055	0.363501	0.357581	0.383929	0.234294
chr8:3538393	chr8	3538393	+	Intron	Pnpla6	ENSMUSG00000004565	50767	0.185714	0.167157	0.141604	0.102941	0.0815851	0.111688	0.133333	0.0638755	0.126185	0.169643	0.208683	0.18836	0.047619	0.0416667	0.0833333	0.0333333	0.152778	0.030303	0.0925926	0.145833	NA	0.037037	3.85277	3.08286	2.44925	3.20331	2.80835	3.03649	8.80721	5.81351	5.22322	4.82648	6.99002	7.83049	0.589236	0.367162	0.302409	0.194055	0.363501	0.357581	0.383929	0.234294
chr8:3538399	chr8	3538399	+	Intron	Pnpla6	ENSMUSG00000004565	50767	NA	0.0238095	NA	0.025641	NA	0.0277778	NA	NA	0.0166667	NA	NA	NA	NA	0.0666667	0.0763889	NA	NA	NA	0.0666667	0.0833333	0.047619	0.0833333	3.85277	3.08286	2.44925	3.20331	2.80835	3.03649	8.80721	5.81351	5.22322	4.82648	6.99002	7.83049	0.589236	0.367162	0.302409	0.194055	0.363501	0.357581	0.383929	0.234294
chr8:3539455	chr8	3539455	+	Intron	Pnpla6	ENSMUSG00000004565	50767	NA	NA	NA	NA	NA	NA	NA	0.0666667	NA	NA	NA	NA	0.037037	0.0222222	0.0416667	0.0555556	NA	NA	0.0555556	0.1	0.0555556	NA	3.85277	3.08286	2.44925	3.20331	2.80835	3.03649	8.80721	5.81351	5.22322	4.82648	6.99002	7.83049	0.589236	0.367162	0.302409	0.194055	0.363501	0.357581	0.383929	0.234294
chr8:3540659	chr8	3540659	+	Intron	Pnpla6	ENSMUSG00000004565	50767	NA	NA	NA	NA	NA	0.166667	NA	0.166667	0.166667	NA	NA	0.333333	NA	0.166667	0.166667	0.166667	NA	0.333333	0.166667	0.75	NA	0.2	3.85277	3.08286	2.44925	3.20331	2.80835	3.03649	8.80721	5.81351	5.22322	4.82648	6.99002	7.83049	0.589236	0.367162	0.302409	0.194055	0.363501	0.357581	0.383929	0.234294
chr8:73432324	chr8	73432324	+	Intron	Map1s	ENSMUSG00000019261	270058	0.4	0.111111	0.333333	NA	NA	0.111111	0.333333	0.5	0.5	NA	0.333333	NA	NA	NA	NA	NA	NA	NA	NA	NA	NA	NA	3.9384	4.22532	4.2844	4.71603	4.35157	4.72253	7.77192	7.15101	8.50875	9.19755	7.90462	8.76736	1.13538	1.39519	1.43869	1.30631	1.38141	1.6094	1.02676	1.18242
chr8:75259851	chr8	75259851	+	Intron	Sin3b	ENSMUSG00000031622	20467	0.0952381	NA	0.0833333	NA	NA	NA	NA	NA	NA	NA	0.0833333	NA	0.666667	NA	0.277778	NA	0.5	NA	NA	0.25	NA	NA	1.18397	0.733695	0.932087	0.860848	0.978305	0.8339	8.63611	7.20804	6.68702	7.6429	6.49899	7.0041	0.675642	0.694515	0.579748	0.522841	0.650844	0.601449	0.839527	0.808363
chr8:82171748	chr8	82171748	+	Intron	Otud4	ENSMUSG00000036990	73945	NA	0.0150612	0.0106902	0.0113689	NA	0.018099	0.0255602	0.0311912	0.0205047	0.0176379	0.00793651	NA	0.0144928	0.00980392	0.0208333	0.0400657	0.0144928	0.025641	0.0215054	0.0263158	0.0151515	NA	6.1904	6.6672	6.85043	7.28301	6.70388	7.22118	5.32538	7.80372	6.8802	6.26563	5.0929	7.79442	1.09332	2.00971	2.28452	2.51733	1.87014	2.07405	3.20224	4.1621
chr8:82174806	chr8	82174806	+	Intron	Otud4	ENSMUSG00000036990	73945	0.00833333	NA	0.0070922	NA	0.0045045	0.00520833	NA	NA	NA	NA	NA	NA	NA	0.0151515	0.0111111	NA	NA	NA	NA	0.0192308	NA	0.0208333	6.1904	6.6672	6.85043	7.28301	6.70388	7.22118	5.32538	7.80372	6.8802	6.26563	5.0929	7.79442	1.09332	2.00971	2.28452	2.51733	1.87014	2.07405	3.20224	4.1621
chr8:82183863	chr8	82183863	+	Intron	Otud4	ENSMUSG00000036990	73945	NA	NA	NA	NA	NA	0.0190476	0.00757576	NA	0.00680272	NA	NA	NA	NA	0.00833333	NA	NA	NA	NA	0.00775194	NA	0.0234343	NA	6.1904	6.6672	6.85043	7.28301	6.70388	7.22118	5.32538	7.80372	6.8802	6.26563	5.0929	7.79442	1.09332	2.00971	2.28452	2.51733	1.87014	2.07405	3.20224	4.1621
chr8:82183931	chr8	82183931	+	Intron	Otud4	ENSMUSG00000036990	73945	0.0128205	NA	NA	NA	0.00925926	NA	NA	0.0166667	NA	NA	NA	NA	NA	0.00877193	NA	0.00813008	0.00757576	NA	0.0190476	NA	NA	NA	6.1904	6.6672	6.85043	7.28301	6.70388	7.22118	5.32538	7.80372	6.8802	6.26563	5.0929	7.79442	1.09332	2.00971	2.28452	2.51733	1.87014	2.07405	3.20224	4.1621
chr8:82187019	chr8	82187019	+	Intron	Otud4	ENSMUSG00000036990	73945	NA	NA	NA	0.00952381	0.0111111	NA	NA	0.0107527	0.0123457	NA	0.0119048	NA	NA	NA	NA	NA	NA	NA	NA	NA	0.030303	NA	6.1904	6.6672	6.85043	7.28301	6.70388	7.22118	5.32538	7.80372	6.8802	6.26563	5.0929	7.79442	1.09332	2.00971	2.28452	2.51733	1.87014	2.07405	3.20224	4.1621
chr8:93409839	chr8	93409839	+	Intron	Chd9	ENSMUSG00000056608	109151	NA	NA	0.666667	1	0.833333	0.166667	0.666667	0.555556	0.333333	0.5	0.333333	0.166667	NA	0.333333	NA	0.666667	0.833333	NA	0.5	NA	NA	0.333333	1.79034	1.96974	1.68235	2.01731	1.878	2.18227	1.74586	1.6101	1.80003	1.65847	1.35079	1.67811	0.417685	0.322095	0.323593	0.331563	0.271469	0.283596	0.35988	0.488713
chr8:93461847	chr8	93461847	+	Intron	Chd9	ENSMUSG00000056608	109151	NA	0.0666667	NA	NA	NA	NA	0.166667	NA	0.111111	NA	NA	NA	0.333333	0.333333	NA	0.166667	NA	NA	NA	NA	NA	NA	1.79034	1.96974	1.68235	2.01731	1.878	2.18227	1.74586	1.6101	1.80003	1.65847	1.35079	1.67811	0.417685	0.322095	0.323593	0.331563	0.271469	0.283596	0.35988	0.488713
chr9:108597462	chr9	108597462	+	Intron	Prkar2a	ENSMUSG00000032601	19087	NA	NA	NA	0.0249554	0.0256757	0.0148148	0.00900901	0.0104167	0.010101	0.0281609	NA	0.0833333	NA	NA	0.111111	0.333333	NA	NA	NA	NA	NA	NA	3.43112	5.38669	5.85414	6.21314	5.93273	5.61659	3.82243	6.5589	7.7901	6.29207	5.04407	6.28128	0.551918	0.778592	1.1864	1.43154	1.30997	1.41348	1.03179	1.21158
chr9:108597480	chr9	108597480	+	Intron	Prkar2a	ENSMUSG00000032601	19087	NA	0.0208333	NA	NA	0.0277778	NA	NA	NA	NA	0.0185185	NA	0.333333	NA	NA	NA	NA	0.133333	0.0833333	NA	NA	NA	NA	3.43112	5.38669	5.85414	6.21314	5.93273	5.61659	3.82243	6.5589	7.7901	6.29207	5.04407	6.28128	0.551918	0.778592	1.1864	1.43154	1.30997	1.41348	1.03179	1.21158
chr9:108604758	chr9	108604758	+	Intron	Prkar2a	ENSMUSG00000032601	19087	NA	0.0185185	0.0367063	0.0151515	NA	NA	0.0444444	0.0166667	0.0185185	0.0548341	NA	NA	NA	NA	NA	NA	NA	NA	NA	NA	NA	NA	3.43112	5.38669	5.85414	6.21314	5.93273	5.61659	3.82243	6.5589	7.7901	6.29207	5.04407	6.28128	0.551918	0.778592	1.1864	1.43154	1.30997	1.41348	1.03179	1.21158
chr9:108604780	chr9	108604780	+	Intron	Prkar2a	ENSMUSG00000032601	19087	NA	0.166667	0.0740741	0.0416667	NA	NA	0.0740741	0.0416667	NA	0.114286	NA	NA	NA	NA	0.333333	NA	NA	NA	NA	NA	NA	NA	3.43112	5.38669	5.85414	6.21314	5.93273	5.61659	3.82243	6.5589	7.7901	6.29207	5.04407	6.28128	0.551918	0.778592	1.1864	1.43154	1.30997	1.41348	1.03179	1.21158
chr9:108629509	chr9	108629509	+	Intron	Prkar2a	ENSMUSG00000032601	19087	NA	0.0238095	NA	0.015873	0.0333333	0.0444444	0.0277778	0.0222222	0.0208333	0.0499109	0.0416667	NA	NA	NA	0.333333	NA	NA	NA	0.111111	NA	NA	NA	3.43112	5.38669	5.85414	6.21314	5.93273	5.61659	3.82243	6.5589	7.7901	6.29207	5.04407	6.28128	0.551918	0.778592	1.1864	1.43154	1.30997	1.41348	1.03179	1.21158
chr9:109840560	chr9	109840560	+	Intron	Map4	ENSMUSG00000032479	17758	0.292593	0.461039	0.150877	0.28836	0.458333	0.357143	0.363215	0.52265	0.291111	0.325	0.494444	0.666667	0.333333	0.333333	0.388889	NA	0.111111	0.333333	0.166667	NA	NA	NA	5.04977	4.48922	4.54273	4.02135	4.27852	4.00061	8.25407	7.99604	7.63434	7.51673	5.85583	6.09959	0.847032	0.857434	0.752059	0.651511	0.617893	0.656887	4.18204	3.90061
chr9:109840564	chr9	109840564	+	Intron	Map4	ENSMUSG00000032479	17758	0.246032	0.387626	0.0825397	0.288889	0.454106	0.310847	0.367725	0.42284	0.303419	0.315741	0.433333	0.666667	0.333333	0.25	0.333333	NA	0.111111	0.333333	0.166667	NA	NA	NA	5.04977	4.48922	4.54273	4.02135	4.27852	4.00061	8.25407	7.99604	7.63434	7.51673	5.85583	6.09959	0.847032	0.857434	0.752059	0.651511	0.617893	0.656887	4.18204	3.90061
chr9:109847857	chr9	109847857	+	Intron	Map4	ENSMUSG00000032479	17758	NA	0.0488215	NA	NA	NA	0.037037	0.0666667	NA	NA	NA	0.047619	NA	NA	NA	0.166667	0.047619	NA	NA	NA	NA	NA	NA	5.04977	4.48922	4.54273	4.02135	4.27852	4.00061	8.25407	7.99604	7.63434	7.51673	5.85583	6.09959	0.847032	0.857434	0.752059	0.651511	0.617893	0.656887	4.18204	3.90061
chr9:40013671	chr9	40013671	+	Intron	Zfp202	ENSMUSG00000025602	80902	0.444444	0.333333	0.833333	0.833333	0.0666667	0.5	0.472222	0.309524	0.583333	0.222222	NA	0.5	0.5	0.166667	0.2	NA	0.333333	0.444444	0.833333	NA	0.333333	NA	4.49663	4.15464	4.34472	3.97701	4.31993	3.6684	3.74251	5.66622	4.92241	5.40693	4.65328	3.43779	0.262137	0.442759	0.502311	0.439064	0.415385	0.513438	0.435878	0.789729
chr9:48848172	chr9	48848172	+	Intron	Usp28	ENSMUSG00000032267	235323	NA	NA	0.0208333	NA	NA	NA	0.047619	NA	NA	0.0833333	NA	0.166667	0.166667	NA	0.333333	NA	NA	NA	NA	NA	NA	NA	4.55097	4.06607	4.8093	3.74525	4.16407	3.77271	2.69541	3.05158	4.30768	4.4133	3.47893	4.2186	0.295002	0.434919	0.498028	0.467993	0.473359	0.434758	0.869612	0.871148
chr9:56339555	chr9	56339555	+	Intron	Hmg20a	ENSMUSG00000032329	66867	0.0555556	NA	0.0833333	0.153704	NA	0.0666667	0.125	NA	0.0416667	NA	NA	0.047619	0.0666667	0.037037	NA	NA	0.166667	0.0972222	0.037037	NA	0.125	0.047619	5.45907	4.9551	4.93054	4.10635	4.65532	4.56076	7.84857	8.1319	8.48281	10.2285	6.37087	5.30435	0.324806	0.310065	0.29953	0.311588	0.238316	0.189643	0.582458	0.577988
chr9:56339571	chr9	56339571	+	Intron	Hmg20a	ENSMUSG00000032329	66867	0.166667	NA	0.037037	NA	0.0555556	NA	0.0666667	NA	NA	NA	0.166667	0.166667	0.166667	0.0555556	0.0666667	0.333333	0.133333	0.0555556	0.0416667	0.1	0.3	NA	5.45907	4.9551	4.93054	4.10635	4.65532	4.56076	7.84857	8.1319	8.48281	10.2285	6.37087	5.30435	0.324806	0.310065	0.29953	0.311588	0.238316	0.189643	0.582458	0.577988
chr9:56339576	chr9	56339576	+	Intron	Hmg20a	ENSMUSG00000032329	66867	NA	0.0833333	0.037037	NA	NA	0.0811966	0.0555556	0.222222	NA	NA	NA	NA	NA	0.233333	NA	0.0833333	NA	0.111111	NA	NA	NA	NA	5.45907	4.9551	4.93054	4.10635	4.65532	4.56076	7.84857	8.1319	8.48281	10.2285	6.37087	5.30435	0.324806	0.310065	0.29953	0.311588	0.238316	0.189643	0.582458	0.577988
chr9:56825205	chr9	56825205	+	Intron	Snupn	ENSMUSG00000055334	66069	0.166667	NA	0.583333	0.0666667	0.0666667	NA	NA	0.111111	0.133333	0.0666667	NA	NA	NA	NA	NA	NA	0.333333	0.333333	NA	NA	NA	0.333333	2.75241	3.43674	2.92929	3.45942	2.88028	3.14246	5.83153	9.61392	9.14087	10.5158	8.77236	10.5636	0.170398	0.152466	0.169531	0.223877	0.204918	0.238273	0.366318	0.208905
chr9:58478146	chr9	58478146	+	Intron	Nptn	ENSMUSG00000032336	20320	0.0444444	NA	NA	0.0846561	NA	NA	NA	NA	0.0833333	NA	NA	NA	NA	NA	0.133333	NA	NA	0.111111	NA	NA	NA	0.0666667	2.91065	2.48551	2.2293	2.3146	2.32116	2.25514	10.5783	5.78589	8.59137	8.37663	6.11051	7.29725	0.995579	0.97773	0.915379	0.899275	0.824195	0.855053	1.083	1.12592
chr9:58478149	chr9	58478149	+	Intron	Nptn	ENSMUSG00000032336	20320	NA	NA	NA	NA	NA	NA	0.0416667	NA	NA	NA	NA	NA	NA	0.133333	NA	NA	0.111111	NA	0.0555556	NA	0.166667	0.111111	2.91065	2.48551	2.2293	2.3146	2.32116	2.25514	10.5783	5.78589	8.59137	8.37663	6.11051	7.29725	0.995579	0.97773	0.915379	0.899275	0.824195	0.855053	1.083	1.12592
chr9:58478219	chr9	58478219	+	Intron	Nptn	ENSMUSG00000032336	20320	0.0277778	0.0575397	NA	NA	0.05	0.047619	0.0698413	NA	0.0185185	NA	NA	0.366667	0.0666667	NA	0.0666667	0.166667	0.277778	NA	NA	0.1	NA	0.130952	2.91065	2.48551	2.2293	2.3146	2.32116	2.25514	10.5783	5.78589	8.59137	8.37663	6.11051	7.29725	0.995579	0.97773	0.915379	0.899275	0.824195	0.855053	1.083	1.12592
chr9:58478681	chr9	58478681	+	Intron	Nptn	ENSMUSG00000032336	20320	NA	NA	NA	NA	0.0811966	0.047619	NA	NA	NA	NA	0.0666667	NA	0.0833333	0.0555556	0.166667	NA	NA	NA	NA	NA	NA	NA	2.91065	2.48551	2.2293	2.3146	2.32116	2.25514	10.5783	5.78589	8.59137	8.37663	6.11051	7.29725	0.995579	0.97773	0.915379	0.899275	0.824195	0.855053	1.083	1.12592
chr9:58478682	chr9	58478682	+	Intron	Nptn	ENSMUSG00000032336	20320	NA	0.0238095	0.0666667	NA	0.0732601	0.047619	NA	0.047619	0.030303	0.047619	NA	NA	NA	0.0555556	NA	NA	NA	0.222222	NA	NA	NA	NA	2.91065	2.48551	2.2293	2.3146	2.32116	2.25514	10.5783	5.78589	8.59137	8.37663	6.11051	7.29725	0.995579	0.97773	0.915379	0.899275	0.824195	0.855053	1.083	1.12592
chr9:58478730	chr9	58478730	+	Intron	Nptn	ENSMUSG00000032336	20320	NA	NA	NA	NA	NA	0.0666667	NA	0.0196078	0.0222222	NA	0.0274972	0.0416667	NA	0.0666667	NA	NA	NA	0.0555556	0.333333	NA	NA	NA	2.91065	2.48551	2.2293	2.3146	2.32116	2.25514	10.5783	5.78589	8.59137	8.37663	6.11051	7.29725	0.995579	0.97773	0.915379	0.899275	0.824195	0.855053	1.083	1.12592
chr9:58478735	chr9	58478735	+	Intron	Nptn	ENSMUSG00000032336	20320	0.214286	0.197826	0.187831	0.17316	0.260827	0.184615	0.152778	0.202179	0.287582	0.168651	0.127774	0.116667	0.231481	0.302436	0.162037	0.214286	0.047619	0.218182	0.166667	NA	0.166667	0.0666667	2.91065	2.48551	2.2293	2.3146	2.32116	2.25514	10.5783	5.78589	8.59137	8.37663	6.11051	7.29725	0.995579	0.97773	0.915379	0.899275	0.824195	0.855053	1.083	1.12592
chr9:58478794	chr9	58478794	+	Intron	Nptn	ENSMUSG00000032336	20320	NA	0.0208333	NA	NA	0.0222222	NA	NA	NA	NA	0.0666667	NA	NA	NA	NA	NA	0.0555556	NA	0.111111	NA	NA	NA	0.0555556	2.91065	2.48551	2.2293	2.3146	2.32116	2.25514	10.5783	5.78589	8.59137	8.37663	6.11051	7.29725	0.995579	0.97773	0.915379	0.899275	0.824195	0.855053	1.083	1.12592
chr9:58482972	chr9	58482972	+	Intron	Nptn	ENSMUSG00000032336	20320	NA	0.047619	NA	NA	NA	NA	0.037037	0.0666667	0.0555556	0.0238095	NA	NA	NA	0.047619	NA	0.166667	0.0416667	NA	0.114286	NA	NA	0.111111	2.91065	2.48551	2.2293	2.3146	2.32116	2.25514	10.5783	5.78589	8.59137	8.37663	6.11051	7.29725	0.995579	0.97773	0.915379	0.899275	0.824195	0.855053	1.083	1.12592
chr9:66796631	chr9	66796631	+	Intron	Rps27l	ENSMUSG00000036781	67941	NA	0.0582846	0.0311594	0.0353261	0.0282187	0.00877193	0.0584127	0.0539683	0.0333333	0.100336	0.0119048	NA	NA	NA	0.152525	0.030303	0.109668	0.0779221	0.075	NA	0.0811966	0.122222	3.18678	4.26437	4.70228	6.02397	4.84532	4.63368	9.45915	10.8236	11.0041	12.7217	9.86102	9.26353	1.03136	1.64933	1.15833	1.3444	1.59737	1.95722	1.67456	1.93333
chr9:69847404	chr9	69847404	+	Intron	Bnip2	ENSMUSG00000011958	12175	0.025641	NA	NA	0.0833333	NA	NA	NA	NA	NA	0.0833333	0.0555556	0.111111	0.047619	NA	0.111111	NA	NA	NA	0.222222	NA	0.0833333	0.0833333	2.48772	1.83136	1.71454	1.55928	1.88635	2.10824	9.82636	9.87806	9.02064	10.0174	7.0554	7.65108	1.10237	1.15642	0.971136	0.923852	0.920177	0.852766	4.26634	3.50704
chr9:70399002	chr9	70399002	+	Intron	Sltm	ENSMUSG00000032212	66660	NA	0.0196078	0.0499109	NA	0.0326954	NA	NA	NA	NA	0.0698006	0.0282965	NA	NA	0.127273	0.037037	NA	NA	NA	NA	0.0714286	NA	0.111111	6.81693	7.22477	7.67229	7.78042	6.84353	7.05405	14.5436	15.9016	13.5928	16.0467	13.6943	16.9793	0.786704	0.809145	0.891201	0.961883	0.944239	0.964782	1.06329	1.21333
chr9:72430536	chr9	72430536	+	Intron	Rfx7	ENSMUSG00000037674	319758	0.037037	NA	0.0277778	NA	NA	NA	NA	0.0333333	NA	0.0666667	NA	0.111111	NA	NA	NA	NA	NA	NA	0.111111	NA	NA	NA	4.4447	5.30545	5.20551	5.78571	5.18552	5.97471	5.17578	3.8993	3.51644	4.11991	3.82203	4.82693	0.608483	0.579444	0.625354	0.820291	0.784056	0.823909	1.6583	1.06853
chr9:82739707	chr9	82739707	+	Intron	Irak1bp1	ENSMUSG00000032251	65099	NA	NA	0.0666667	NA	0.177778	NA	NA	NA	NA	NA	0.0555556	0.111111	NA	NA	NA	0.111111	NA	NA	0.0833333	NA	NA	NA	5.82293	6.01661	6.24199	7.45379	6.38491	7.40176	6.60848	8.60154	9.07374	8.42462	7.42186	9.29372	0.228711	0.303287	0.324885	0.234877	0.418053	0.413217	0.453342	0.595006
chrX:102286175	chrX	102286175	+	Intron	Pbdc1	ENSMUSG00000031226	67683	NA	NA	NA	0.0138889	NA	0.0175439	NA	NA	0.047619	NA	0.010101	NA	NA	NA	NA	NA	NA	0.0833333	0.0277778	NA	NA	NA	4.4884	5.08644	4.93997	4.4415	4.6732	5.10937	6.6484	8.27761	7.68865	7.30635	7.32155	8.68327	0.566358	0.765408	0.718973	0.800708	0.717003	0.682838	0.524938	0.926457
chrX:102286181	chrX	102286181	+	Intron	Pbdc1	ENSMUSG00000031226	67683	NA	NA	NA	0.0151515	NA	NA	NA	NA	0.047619	NA	NA	NA	0.0555556	NA	0.0666667	0.0555556	NA	NA	0.0888889	NA	NA	0.0416667	4.4884	5.08644	4.93997	4.4415	4.6732	5.10937	6.6484	8.27761	7.68865	7.30635	7.32155	8.68327	0.566358	0.765408	0.718973	0.800708	0.717003	0.682838	0.524938	0.926457
chrX:102286182	chrX	102286182	+	Intron	Pbdc1	ENSMUSG00000031226	67683	NA	NA	NA	0.0151515	NA	NA	NA	NA	0.0222222	0.0257937	NA	NA	NA	NA	NA	NA	NA	NA	0.0892857	NA	0.030303	0.0416667	4.4884	5.08644	4.93997	4.4415	4.6732	5.10937	6.6484	8.27761	7.68865	7.30635	7.32155	8.68327	0.566358	0.765408	0.718973	0.800708	0.717003	0.682838	0.524938	0.926457
chrX:102286700	chrX	102286700	+	Intron	Pbdc1	ENSMUSG00000031226	67683	NA	NA	0.0196078	0.0478469	NA	0.0333333	NA	0.00980392	NA	NA	0.0151515	0.236111	NA	0.047619	0.0833333	0.0740741	0.0666667	0.166667	0.0952381	NA	0.138889	0.0833333	4.4884	5.08644	4.93997	4.4415	4.6732	5.10937	6.6484	8.27761	7.68865	7.30635	7.32155	8.68327	0.566358	0.765408	0.718973	0.800708	0.717003	0.682838	0.524938	0.926457
chrX:102286705	chrX	102286705	+	Intron	Pbdc1	ENSMUSG00000031226	67683	NA	0.0185185	0.0353261	0.0444444	0.06	0.0416667	0.0555556	0.0345679	0.0277778	0.015873	NA	0.111111	NA	0.0185185	0.138889	0.206349	0.125	0.166667	0.303571	0.333333	0.0952381	0.0666667	4.4884	5.08644	4.93997	4.4415	4.6732	5.10937	6.6484	8.27761	7.68865	7.30635	7.32155	8.68327	0.566358	0.765408	0.718973	0.800708	0.717003	0.682838	0.524938	0.926457
chrX:139135062	chrX	139135062	+	Intron	Tmem164	ENSMUSG00000047045	209497	NA	0.111111	NA	0.14652	0.333333	NA	0.166667	NA	0.0416667	NA	0.0666667	NA	NA	NA	NA	NA	NA	NA	0.333333	NA	NA	NA	2.45402	1.85919	1.77218	1.87393	2.12447	1.8105	4.58437	3.63037	4.00833	4.04291	3.32166	4.43478	0.357621	0.386984	0.398832	0.385298	0.376013	0.356254	0.858193	0.86813
chrX:151727589	chrX	151727589	+	Intron	Acot9	ENSMUSG00000025287	56360	NA	0.166667	NA	0.037037	NA	NA	NA	NA	NA	NA	0.444444	NA	NA	NA	0.111111	NA	0.166667	NA	NA	NA	0.166667	NA	0.916909	1.22041	1.22997	1.44942	1.13743	1.05408	6.83821	6.53385	7.18338	6.54081	4.2748	4.94925	0.482981	0.543412	0.37922	0.367657	0.207727	0.282638	0.350107	0.452793
chrX:159470108	chrX	159470108	+	UTR	Ctps2	ENSMUSG00000031360	55936	0.047619	0.0555556	0.227619	0.338889	NA	0.123284	0.227778	0.15873	0.0997151	0.0666667	0.151515	NA	NA	0.166667	NA	NA	NA	0.111111	0.111111	NA	NA	NA	0.903745	0.886164	1.01979	0.943308	1.07918	1.19757	2.98477	2.23456	2.82297	1.99396	2.30245	2.69576	0.222441	0.193592	0.187336	0.163909	0.138944	0.156453	0.391341	0.437597
chrX:159470127	chrX	159470127	+	UTR	Ctps2	ENSMUSG00000031360	55936	0.037037	NA	NA	0.0111111	NA	0.1	NA	NA	0.0238095	0.047619	NA	NA	NA	NA	NA	0.0833333	0.111111	NA	NA	NA	0.111111	NA	0.903745	0.886164	1.01979	0.943308	1.07918	1.19757	2.98477	2.23456	2.82297	1.99396	2.30245	2.69576	0.222441	0.193592	0.187336	0.163909	0.138944	0.156453	0.391341	0.437597
chr10:76785352	chr10	76785352	-	Exon	Adarb1	ENSMUSG00000020262	110532	NA	NA	NA	0.111111	NA	NA	NA	NA	NA	NA	NA	NA	NA	NA	NA	0.0333333	0.166667	0.111111	0.0196078	0.05	NA	0.0266667	2.74463	2.31771	2.79121	2.84791	2.53658	2.9454	1.89525	2.55235	1.07119	2.3797	2.86183	3.81206	0.212342	0.286241	0.301583	0.25484	0.498078	0.461119	0.524361	0.621502
chr10:76785353	chr10	76785353	-	Exon	Adarb1	ENSMUSG00000020262	110532	NA	NA	0.0666667	NA	NA	NA	NA	NA	NA	0.037037	NA	0.111111	0.291667	0.600926	NA	0.714815	0.406944	0.491453	0.76455	0.875	0.894697	0.439103	2.74463	2.31771	2.79121	2.84791	2.53658	2.9454	1.89525	2.55235	1.07119	2.3797	2.86183	3.81206	0.212342	0.286241	0.301583	0.25484	0.498078	0.461119	0.524361	0.621502
chr10:76785366	chr10	76785366	-	Exon	Adarb1	ENSMUSG00000020262	110532	NA	NA	NA	0.0833333	0.030303	NA	0.0666667	NA	NA	0.037037	NA	0.111111	0.285714	0.536111	NA	0.690476	0.333333	0.306667	0.710131	0.857143	0.671569	0.360248	2.74463	2.31771	2.79121	2.84791	2.53658	2.9454	1.89525	2.55235	1.07119	2.3797	2.86183	3.81206	0.212342	0.286241	0.301583	0.25484	0.498078	0.461119	0.524361	0.621502
chr10:76786805	chr10	76786805	-	Exon	Adarb1	ENSMUSG00000020262	110532	NA	NA	NA	0.333333	NA	NA	NA	NA	0.047619	NA	0.133333	NA	NA	NA	0.0666667	0.266667	0.166667	NA	0.116667	0.125	0.030303	0.1	2.74463	2.31771	2.79121	2.84791	2.53658	2.9454	1.89525	2.55235	1.07119	2.3797	2.86183	3.81206	0.212342	0.286241	0.301583	0.25484	0.498078	0.461119	0.524361	0.621502
chr10:82973107	chr10	82973107	-	Intron	Aldh1l2	ENSMUSG00000020256	216188	NA	NA	0.333333	NA	NA	NA	0.333333	NA	NA	NA	0.166667	0.333333	NA	0.333333	NA	NA	NA	0.333333	NA	NA	NA	0.333333	4.38632	3.11457	3.53014	2.56769	2.99022	2.59202	7.54439	8.4942	7.87389	6.4903	6.85584	5.96589	0.939664	1.13908	1.02703	0.698532	0.960193	0.851685	1.37412	1.44081
chr10:94953652	chr10	94953652	-	Intron	Mrpl42	ENSMUSG00000062981	67270	NA	NA	0.0833333	NA	NA	NA	0.0333333	NA	NA	NA	0.0350877	0.233333	NA	0.161111	0.047619	NA	NA	0.108333	0.205556	0.125	0.0666667	0.0969697	2.90964	3.22409	3.1406	3.92653	3.33917	3.70008	5.48601	6.84026	6.70805	7.54084	7.60457	9.41169	0.337589	0.347269	0.351228	0.370946	0.45641	0.623725	0.595005	0.491293
chr10:94953708	chr10	94953708	-	Intron	Mrpl42	ENSMUSG00000062981	67270	NA	0.0833333	NA	NA	NA	0.047619	NA	0.0416667	NA	NA	NA	0.0833333	NA	0.166667	0.111111	0.208333	0.166667	0.208333	0.0666667	0.166667	0.208333	0.167989	2.90964	3.22409	3.1406	3.92653	3.33917	3.70008	5.48601	6.84026	6.70805	7.54084	7.60457	9.41169	0.337589	0.347269	0.351228	0.370946	0.45641	0.623725	0.595005	0.491293
chr10:9607337	chr10	9607337	-	Intron	Stxbp5	ENSMUSG00000019790	78808	NA	NA	NA	NA	NA	0.0606061	0.037037	0.0416667	NA	NA	0.0666667	NA	NA	NA	0.138889	NA	0.333333	NA	0.0833333	0.333333	0.333333	NA	1.56837	1.55739	1.48713	1.75105	1.32542	1.54418	0.886933	0.421155	0.866514	0.719552	0.473701	0.643068	0.248918	0.226664	0.230829	0.218227	0.272454	0.264089	0.281429	0.193144
chr11:100362988	chr11	100362988	-	Intron	Acly	ENSMUSG00000020917	104112	NA	NA	NA	NA	0.0185185	NA	NA	NA	NA	NA	NA	0.0277778	NA	0.015873	0.015873	NA	0.0151515	NA	NA	NA	0.0175439	NA	3.45028	3.40767	3.33016	3.87539	3.58226	3.75135	19.1089	19.4382	17.7034	23.1315	24.3436	23.6626	1.08908	1.32216	1.37415	1.41709	1.66918	1.70463	3.27233	3.0698
chr11:101060045	chr11	101060045	-	UTR	Ezh1	ENSMUSG00000006920	14055	0.15	NA	NA	0.0833333	NA	0.037037	0.0952381	0.047619	0.0833333	0.182234	0.0735043	0.333333	NA	NA	0.0666667	0.361111	0.15	0.130952	0.177778	NA	0.311111	0.420635	1.75653	2.72687	2.93839	2.95533	2.60776	2.92611	3.51902	3.78071	5.0775	4.05145	4.58475	4.4134	0.208069	0.277925	0.397788	0.454593	0.530104	0.531769	0.477974	0.299632
chr11:102388200	chr11	102388200	-	Intron	Gpatch8	ENSMUSG00000034621	237943	0.0416667	0.0196078	0.0238095	0.0208333	NA	0.015873	NA	NA	0.0277778	NA	NA	NA	NA	NA	NA	NA	NA	NA	NA	0.125	NA	0.333333	3.52999	3.17854	3.20635	3.22176	3.04738	3.33773	8.68088	6.25761	6.46442	7.15346	5.17398	6.63576	0.741689	0.623742	0.520876	0.49555	0.55435	0.613414	1.21648	0.884687
chr11:102673406	chr11	102673406	-	Intron	Gjc1	ENSMUSG00000034520	14615	NA	0.0923077	0.238095	0.283333	0.214815	0.0892857	0.0858586	0.222222	0.0952381	0.0969697	0.188889	0.325397	0.583333	0.255556	0.283333	0.5	0.416667	NA	NA	NA	0.25	0.333333	1.75888	1.78614	2.08942	2.2669	2.06938	2.47435	2.60936	2.85125	3.44457	3.58443	4.01296	4.04628	0.75817	0.900578	0.697508	0.768037	0.608427	0.762822	1.17838	1.14575
chr11:102673418	chr11	102673418	-	Intron	Gjc1	ENSMUSG00000034520	14615	0.05	0.136003	NA	0.0977564	0.114286	0.0809524	0.0833333	0.0857143	0.122222	0.125	0.047619	0.111111	0.166667	0.0666667	0.191667	0.177778	0.0666667	0.25	NA	0.125	0.305556	0.111111	1.75888	1.78614	2.08942	2.2669	2.06938	2.47435	2.60936	2.85125	3.44457	3.58443	4.01296	4.04628	0.75817	0.900578	0.697508	0.768037	0.608427	0.762822	1.17838	1.14575
chr11:102674333	chr11	102674333	-	Intron	Gjc1	ENSMUSG00000034520	14615	0.0892857	0.0519704	0.0383772	0.123986	0.0989011	0.0992647	0.0238095	0.030303	0.0333333	0.0208333	0.0175439	0.197619	0.111111	0.0846561	0.0719697	0.166667	0.075	0.166667	0.180303	0.166667	0.0833333	NA	1.75888	1.78614	2.08942	2.2669	2.06938	2.47435	2.60936	2.85125	3.44457	3.58443	4.01296	4.04628	0.75817	0.900578	0.697508	0.768037	0.608427	0.762822	1.17838	1.14575
chr11:102674346	chr11	102674346	-	Intron	Gjc1	ENSMUSG00000034520	14615	0.025641	0.0151515	0.0555556	0.037037	0.0333333	NA	0.0333333	NA	NA	0.119048	NA	0.172619	0.194444	0.0779221	0.037037	0.25	0.103175	NA	NA	NA	0.0833333	0.111111	1.75888	1.78614	2.08942	2.2669	2.06938	2.47435	2.60936	2.85125	3.44457	3.58443	4.01296	4.04628	0.75817	0.900578	0.697508	0.768037	0.608427	0.762822	1.17838	1.14575
chr11:106756300	chr11	106756300	-	Intron	Smurf2	ENSMUSG00000018363	66313	0.025641	0.0444444	0.030303	0.0606061	0.0763889	0.0952381	0.025641	0.0740741	0.047619	0.0892857	NA	NA	NA	NA	0.194444	0.0833333	NA	NA	NA	NA	0.333333	NA	1.65438	1.34041	1.61193	1.66838	1.67557	1.60493	4.6427	3.45618	3.98592	4.07012	2.11801	2.75455	0.965832	1.00886	0.92269	0.976904	0.843242	0.855198	1.91487	2.41174
chr11:106756303	chr11	106756303	-	Intron	Smurf2	ENSMUSG00000018363	66313	NA	0.0222222	NA	NA	NA	0.0661376	NA	0.0333333	NA	0.0416667	NA	NA	NA	NA	0.15	0.0833333	0.111111	NA	NA	NA	NA	NA	1.65438	1.34041	1.61193	1.66838	1.67557	1.60493	4.6427	3.45618	3.98592	4.07012	2.11801	2.75455	0.965832	1.00886	0.92269	0.976904	0.843242	0.855198	1.91487	2.41174
chr11:106757627	chr11	106757627	-	Intron	Smurf2	ENSMUSG00000018363	66313	0.0666667	0.160606	0.0740741	0.0392157	0.0809524	0.153439	0.109152	NA	0.0787037	0.0666667	0.166667	0.166667	0.388889	0.111111	NA	0.0833333	0.5	0.166667	NA	NA	0.333333	NA	1.65438	1.34041	1.61193	1.66838	1.67557	1.60493	4.6427	3.45618	3.98592	4.07012	2.11801	2.75455	0.965832	1.00886	0.92269	0.976904	0.843242	0.855198	1.91487	2.41174
chr11:106952459	chr11	106952459	-	Intron	Bptf	ENSMUSG00000040481	207165	NA	0.0185185	0.0555556	NA	NA	0.0185185	0.0238095	0.0333333	NA	NA	NA	NA	NA	0.0666667	NA	NA	NA	0.0833333	NA	NA	0.111111	0.0666667	2.23894	3.22853	3.31212	4.02528	3.67266	3.97097	1.34664	1.40579	1.74675	1.45266	1.65491	1.55614	0.627148	0.665	0.718258	0.684131	0.789359	0.748099	1.56734	1.92656
chr11:107816078	chr11	107816078	-	Intron	Prkca	ENSMUSG00000050965	18750	NA	0.0047619	NA	0.00953283	NA	0.00903935	0.0037037	0.00813008	0.0133333	NA	0.00537634	NA	NA	0.0163934	0.015873	0.0222222	0.0119048	NA	0.0114943	0.0384615	NA	NA	2.65039	3.0128	2.63536	2.63425	2.66429	2.50561	8.49725	6.05534	8.38952	9.07988	6.19135	7.61561	0.863196	1.1104	1.03441	1.00066	0.932513	0.845217	1.68488	2.05864
chr11:115361665	chr11	115361665	-	Intron	Jpt1	ENSMUSG00000020737	15374	NA	NA	NA	NA	NA	NA	NA	NA	0.037037	0.233333	NA	NA	0.0833333	0.0277778	NA	NA	0.0555556	0.0277778	0.0350877	0.0454545	0.037037	0.117259	4.29455	4.46299	4.36427	4.71858	4.67999	5.04534	19.3759	20.3828	17.5601	20.602	21.3464	20.0534	1.22255	1.7425	1.56142	1.77236	1.47501	1.75231	1.50786	1.70795
chr11:118132936	chr11	118132936	-	Intron	Usp36	ENSMUSG00000033909	72344	NA	NA	NA	0.0144928	0.0175439	0.0175439	0.047619	0.0238095	NA	NA	0.030303	NA	NA	NA	NA	NA	NA	NA	NA	NA	0.0666667	NA	10.7744	11.6921	11.2919	12.2988	11.1253	11.3187	12.8537	19.0911	18.5731	16.8474	15.8055	16.1175	1.43754	2.61352	3.61098	3.7786	3.43225	3.18612	1.61882	2.13045
chr11:118143964	chr11	118143964	-	Intron	Usp36	ENSMUSG00000033909	72344	0.0333333	0.0104167	0.00854701	NA	NA	NA	0.00680272	NA	0.00757576	NA	NA	NA	NA	NA	NA	0.0185185	NA	0.0277778	0.0273133	0.0294118	NA	NA	10.7744	11.6921	11.2919	12.2988	11.1253	11.3187	12.8537	19.0911	18.5731	16.8474	15.8055	16.1175	1.43754	2.61352	3.61098	3.7786	3.43225	3.18612	1.61882	2.13045
chr11:119151802	chr11	119151802	-	Intron	Eif4a3	ENSMUSG00000025580	192170	0.0238095	0.037037	0.0555556	NA	0.187179	0.0416667	NA	0.0166667	NA	0.0561594	0.0238095	0.122222	0.0666667	0.037037	0.0416667	0.140741	NA	NA	0.0757576	0.0625	NA	0.0666667	3.45011	3.67555	4.00929	4.53362	3.70454	4.07284	8.47353	8.5182	10.313	9.71818	8.63033	8.93575	1.39939	1.62152	1.71823	1.84032	1.87878	1.81395	2.02973	2.35917
chr11:119153396	chr11	119153396	-	Intron	Eif4a3	ENSMUSG00000025580	192170	NA	0.0666667	0.166667	0.166667	NA	0.188889	NA	NA	0.291667	0.047619	NA	NA	NA	0.436364	0.111111	0.0833333	NA	NA	0.0833333	NA	NA	0.0555556	3.45011	3.67555	4.00929	4.53362	3.70454	4.07284	8.47353	8.5182	10.313	9.71818	8.63033	8.93575	1.39939	1.62152	1.71823	1.84032	1.87878	1.81395	2.02973	2.35917
chr11:40516085	chr11	40516085	-	UTR	Hmmr	ENSMUSG00000020330	15366	0.0154759	0.0247307	0.0223495	0.028431	0.0206371	0.0305653	0.0261758	0.0267537	0.0205839	0.0282205	0.0275251	0.0124917	0.012312	0.012885	0.0151548	0.0158517	0.00897764	0.0202527	0.0128806	0.0133672	0.0181864	0.00740247	6.9023	7.55396	7.03166	8.29558	6.72238	7.47344	3.38247	3.21355	3.0606	2.81485	4.49804	4.46582	0.766795	0.657256	0.469951	0.503493	0.621232	0.82911	1.61902	1.46056
chr11:4667144	chr11	4667144	-	UTR	Nf2	ENSMUSG00000009073	18016	NA	NA	NA	NA	0.0222222	NA	NA	NA	NA	NA	NA	NA	0.00406504	0.00374532	0.003663	NA	0.00456621	0.00537634	0.00411523	NA	0.00330033	NA	4.45205	3.68938	4.32993	3.46922	3.97089	3.54164	7.31315	6.98145	7.09575	6.714	6.46922	6.96402	0.412168	0.42935	0.459785	0.452347	0.474809	0.481108	1.36448	1.38546
chr11:53077860	chr11	53077860	-	Exon	Hspa4	ENSMUSG00000020361	15525	0.0740741	0.015873	0.0571429	0.20346	0.174342	0.0642857	0.102273	0.181385	0.208333	0.106883	0.169853	0.309524	0.232804	0.142857	0.237162	0.360606	0.442857	0.0952381	0.375661	0.25	0.481481	0.16934	6.02755	6.98648	6.6161	7.43054	7.12465	7.11619	15.357	15.5905	16.7411	19.2026	16.2089	14.9817	1.7744	2.05546	2.37794	2.58692	2.36954	2.53337	2.43977	3.1362
chr11:53703386	chr11	53703386	-	Intron	Slc22a5	ENSMUSG00000018900	20520	NA	0.222222	0.216667	0.111111	0.0952381	NA	0.0925926	NA	0.4	0.111111	0.0416667	NA	0.111111	NA	NA	0.333333	NA	0.5	0.177778	NA	0.111111	NA	1.45019	1.17401	1.10004	1.21491	1.13735	1.0669	1.60097	2.6489	2.14476	2.12231	1.67499	2.10836	0.0757172	0.0930473	0.132057	0.0927838	0.179062	0.12528	0.0603953	0.0391796
chr11:53775137	chr11	53775137	-	Intron	Slc22a21	ENSMUSG00000063652	56517	NA	NA	0.166667	0.0833333	NA	NA	NA	0.333333	NA	0.166667	0.333333	NA	0.277778	0.166667	0.166667	NA	0.416667	0.0833333	NA	NA	0.0833333	0.166667	1.09874	1.54001	1.22997	1.60175	1.88653	1.47146	1.8434	2.60836	2.76178	1.99642	1.95305	2.23218	0.0958756	0.184559	0.168725	0.218544	0.254167	0.238594	0.0607883	0.149321
chr11:6159852	chr11	6159852	-	Intron	Ddx56	ENSMUSG00000004393	52513	0.030303	0.114815	NA	0.0192308	0.0486111	0.109137	0.0606061	NA	0.124552	0.0119048	NA	0.0107527	0.148399	0.0375	0.100877	0.0888889	0.0625	0.0254804	0.0575397	NA	0.234823	0.0416667	4.30899	4.71945	4.11669	5.25237	4.61582	4.68971	6.35133	8.0201	7.37508	7.4787	7.02981	7.62942	1.1773	1.51049	1.55613	1.45044	1.67385	1.69501	3.24099	3.26411
chr11:6159861	chr11	6159861	-	Intron	Ddx56	ENSMUSG00000004393	52513	NA	0.0944444	0.0114943	0.00628931	0.111111	NA	NA	NA	0.030303	NA	NA	NA	0.037037	0.0666667	0.252874	0.252991	NA	0.0333333	NA	NA	0.0144928	NA	4.30899	4.71945	4.11669	5.25237	4.61582	4.68971	6.35133	8.0201	7.37508	7.4787	7.02981	7.62942	1.1773	1.51049	1.55613	1.45044	1.67385	1.69501	3.24099	3.26411
chr11:61600781	chr11	61600781	-	Intron	Ulk2	ENSMUSG00000004798	29869	NA	NA	0.166667	0.0833333	0.111111	NA	0.0833333	NA	0.333333	NA	0.0833333	NA	NA	0.166667	NA	NA	NA	NA	NA	NA	NA	NA	2.88343	2.46509	2.74691	3.10507	2.44975	3.23254	15.7467	11.8434	7.29952	10.635	9.88485	11.215	0.257341	0.19963	0.172932	0.160013	0.224625	0.24113	0.461062	0.233713
chr11:6160898	chr11	6160898	-	Intron	Ddx56	ENSMUSG00000004393	52513	0.0767544	0.133333	0.0533333	0.0423188	0.0681992	0.0466667	0.0684524	0.0441919	0.0998994	0.0589372	0.0563158	0.0957265	0.124638	0.178566	0.15311	0.127896	0.172343	0.106798	0.123963	0.157201	0.133747	0.165741	4.30899	4.71945	4.11669	5.25237	4.61582	4.68971	6.35133	8.0201	7.37508	7.4787	7.02981	7.62942	1.1773	1.51049	1.55613	1.45044	1.67385	1.69501	3.24099	3.26411
chr11:68180563	chr11	68180563	-	Intron	Ntn1	ENSMUSG00000020902	18208	NA	0.177778	0.0555556	0.447619	0.108333	0.1	0.255556	0.277778	0.111111	0.111111	0.166667	0.333333	NA	0.166667	0.222222	0.333333	NA	NA	0.0833333	NA	NA	NA	1.19628	0.922818	0.944703	1.05245	0.848268	1.0874	1.29753	1.90065	1.07801	1.65878	2.07617	1.84268	0.386409	0.416999	0.402933	0.372055	0.429728	0.366806	0.474991	0.482136
chr11:77367864	chr11	77367864	-	Intron	Taok1	ENSMUSG00000017291	216965	0.0138889	0.0238095	NA	0.0185185	0.030303	0.037037	NA	NA	NA	0.0119048	NA	NA	NA	NA	0.166667	NA	NA	NA	NA	NA	0.0555556	NA	2.79999	2.04389	2.41437	2.1464	2.31457	2.42066	13.7961	8.77914	7.4247	10.0134	7.58155	9.88266	1.01058	0.769164	0.655362	0.66962	0.622985	0.785814	2.04922	1.94517
chr11:77367876	chr11	77367876	-	Intron	Taok1	ENSMUSG00000017291	216965	0.030303	0.0196078	0.139927	0.0608466	0.0407925	0.142191	0.0277778	0.143056	NA	0.0555556	0.025641	0.111111	0.177778	0.133333	0.455556	0.037037	0.25	0.0666667	NA	NA	0.214286	NA	2.79999	2.04389	2.41437	2.1464	2.31457	2.42066	13.7961	8.77914	7.4247	10.0134	7.58155	9.88266	1.01058	0.769164	0.655362	0.66962	0.622985	0.785814	2.04922	1.94517
chr11:77381965	chr11	77381965	-	Intron	Taok1	ENSMUSG00000017291	216965	NA	0.0238095	0.025641	0.0416667	NA	0.025641	NA	NA	0.0333333	0.0277778	0.0460317	0.0833333	0.15873	0.277778	NA	NA	0.111111	0.0666667	NA	NA	NA	NA	2.79999	2.04389	2.41437	2.1464	2.31457	2.42066	13.7961	8.77914	7.4247	10.0134	7.58155	9.88266	1.01058	0.769164	0.655362	0.66962	0.622985	0.785814	2.04922	1.94517
chr11:79747585	chr11	79747585	-	UTR	Utp6	ENSMUSG00000035575	216987	0.0411224	0.0518255	0.0445913	0.0284491	0.0583734	0.0467349	0.0697735	0.0261073	0.068952	0.0470637	0.0327578	0.0208232	0.0364224	0.0345171	0.0304192	0.0407276	0.0357246	0.0333382	0.0222218	0.02	0.0373017	0.00903541	3.05632	3.73231	3.76011	4.12905	3.82411	3.93361	4.26418	7.54363	8.01381	9.05288	7.06172	8.83744	0.717129	0.852225	1.0245	1.04987	1.08134	1.25711	1.14135	1.0209
chr11:79760714	chr11	79760714	-	Intron	Utp6	ENSMUSG00000035575	216987	NA	NA	0.0555556	NA	NA	0.103175	0.0833333	0.0416667	NA	NA	NA	NA	NA	0.0833333	NA	NA	NA	0.166667	NA	NA	0.277778	0.0555556	3.05632	3.73231	3.76011	4.12905	3.82411	3.93361	4.26418	7.54363	8.01381	9.05288	7.06172	8.83744	0.717129	0.852225	1.0245	1.04987	1.08134	1.25711	1.14135	1.0209
chr11:84306807	chr11	84306807	-	Intron	Aatf	ENSMUSG00000018697	56321	NA	NA	0.0606061	NA	NA	0.0166667	NA	0.0464744	0.0367063	0.0166667	0.041514	NA	0.111111	NA	NA	0.111111	0.037037	NA	NA	NA	NA	NA	8.07855	7.25533	7.13895	7.38595	6.75069	6.50882	10.6004	13.2948	12.3389	11.6579	10.9945	10.6118	0.695812	0.811796	0.738658	0.827781	0.945657	1.03416	1.27284	1.26606
chr11:84312315	chr11	84312315	-	Intron	Aatf	ENSMUSG00000018697	56321	NA	NA	0.0298895	NA	0.0428571	NA	NA	NA	0.036715	NA	NA	NA	NA	NA	NA	NA	NA	NA	0.111111	NA	0.0833333	0.111111	8.07855	7.25533	7.13895	7.38595	6.75069	6.50882	10.6004	13.2948	12.3389	11.6579	10.9945	10.6118	0.695812	0.811796	0.738658	0.827781	0.945657	1.03416	1.27284	1.26606
chr11:84315024	chr11	84315024	-	Intron	Aatf	ENSMUSG00000018697	56321	NA	0.0333333	NA	0.00980392	0.00833333	NA	0.0107527	NA	0.0119048	0.0144928	0.00775194	NA	0.0416667	NA	NA	NA	NA	NA	NA	NA	NA	NA	8.07855	7.25533	7.13895	7.38595	6.75069	6.50882	10.6004	13.2948	12.3389	11.6579	10.9945	10.6118	0.695812	0.811796	0.738658	0.827781	0.945657	1.03416	1.27284	1.26606
chr11:88332210	chr11	88332210	-	Intron	Msi2	ENSMUSG00000069769	76626	NA	0.194872	0.236111	0.25	NA	NA	0.3	0.166667	0.25	0.444444	NA	0.333333	NA	NA	NA	NA	0.166667	NA	0.333333	NA	0.166667	NA	1.79403	1.80371	1.68571	1.83572	1.69105	1.40129	0.452921	0.580058	0.489326	0.776714	0.397699	1.719	0.302389	0.290516	0.307574	0.282105	0.313295	0.260765	0.448677	0.323598
chr11:88693093	chr11	88693093	-	Exon	Akap1	ENSMUSG00000018428	11640	NA	NA	0.0138889	NA	0.0144928	0.025641	NA	NA	NA	NA	0.0166667	NA	0.00747703	0.00311526	0.004662	0.00308642	NA	NA	0.00616037	NA	NA	0.00268817	6.2622	5.32525	5.62096	5.61763	5.19402	5.4036	8.52849	12.0435	11.301	11.9022	10.9676	11.0785	0.580595	0.968196	1.02457	0.98668	1.04821	0.9932	0.848708	0.94701
chr11:97077909	chr11	97077909	-	Intron	Npepps	ENSMUSG00000001441	19155	0.0416667	0.0208333	0.0625	0.0350427	0.0518519	0.0350877	NA	NA	0.0185185	0.0175439	NA	0.0833333	NA	NA	NA	0.111111	NA	NA	NA	0.125	0.0833333	NA	1.27194	1.11456	0.898132	0.935361	0.866372	0.873493	1.99503	1.91096	2.29326	1.82575	1.4304	1.77913	0.897852	0.736218	0.619818	0.645561	0.66636	0.69849	1.00251	0.931673
chr12:100687968	chr12	100687968	-	Intron	Foxn3	ENSMUSG00000033713	71375	0.0173333	0.0424213	0.0319576	0.0527297	0.0303311	0.0791717	0.0277778	0.0158796	0.00809213	0.0239494	0.0189756	NA	NA	0.00813008	0.0342523	0.0111111	NA	0.00877193	0.0365923	NA	0.0202778	NA	1.11433	1.14117	0.941682	1.13829	0.939222	1.06138	1.46401	0.521432	0.715157	1.24901	0.641932	1.0093	0.249141	0.217473	0.242639	0.207586	0.229743	0.168223	0.221716	0.282873
chr12:36830713	chr12	36830713	-	Intron	Bzw2	ENSMUSG00000020547	66912	NA	NA	NA	NA	0.166667	NA	NA	NA	0.222222	NA	0.0833333	0.5	NA	NA	NA	NA	NA	0.037037	NA	NA	0.0555556	NA	5.56508	7.61001	7.99293	8.48077	8.01084	7.921	7.04625	10.9991	10.9548	11.8487	10.4232	10.8572	0.513483	0.952452	1.49951	1.81206	1.75107	1.68082	0.72973	0.965934
chr12:36830726	chr12	36830726	-	Intron	Bzw2	ENSMUSG00000020547	66912	NA	NA	NA	0.015873	NA	NA	0.0185185	0.0666667	0.0133333	NA	NA	0.0666667	NA	NA	NA	NA	NA	NA	0.0222222	0.333333	0.25	0.176435	5.56508	7.61001	7.99293	8.48077	8.01084	7.921	7.04625	10.9991	10.9548	11.8487	10.4232	10.8572	0.513483	0.952452	1.49951	1.81206	1.75107	1.68082	0.72973	0.965934
chr12:56847552	chr12	56847552	-	Intron	Ralgapa1	ENSMUSG00000021027	56784	NA	NA	NA	NA	NA	0.047619	NA	NA	0.166667	NA	0.138889	0.666667	NA	0.333333	NA	NA	NA	NA	NA	NA	NA	0.333333	0.743871	0.981238	0.76024	0.804551	0.905542	1.06982	3.27051	2.4672	2.27367	2.18557	2.09852	2.64057	0.149332	0.119279	0.12875	0.149773	0.1656	0.162719	0.44515	0.354961
chr12:56847567	chr12	56847567	-	Intron	Ralgapa1	ENSMUSG00000021027	56784	NA	NA	NA	NA	0.047619	0.0333333	0.0555556	0.0666667	0.111111	0.0555556	0.0740741	0.333333	0.0833333	NA	NA	NA	NA	NA	0.166667	NA	0.222222	NA	0.743871	0.981238	0.76024	0.804551	0.905542	1.06982	3.27051	2.4672	2.27367	2.18557	2.09852	2.64057	0.149332	0.119279	0.12875	0.149773	0.1656	0.162719	0.44515	0.354961
chr12:60158943	chr12	60158943	-	Intron	Trappc6b	ENSMUSG00000020993	78232	NA	NA	0.0104167	NA	0.138889	0.130719	NA	NA	NA	NA	0.0846561	NA	0.166667	NA	NA	0.166667	NA	NA	NA	NA	NA	NA	1.46128	1.28482	1.59117	1.64347	1.48118	1.29371	6.81337	6.20413	7.35832	6.02847	5.10434	4.79197	0.573173	0.461153	0.374875	0.428281	0.431014	0.441494	1.06373	0.874513
chr12:85512349	chr12	85512349	-	Intron	Elmsan1	ENSMUSG00000042507	238317	NA	NA	NA	0.037037	0.030303	0.025641	NA	NA	0.0833333	NA	0.0333333	NA	0.333333	NA	NA	NA	NA	NA	NA	NA	NA	0.166667	1.72693	2.24438	2.06857	2.45611	2.41739	2.0986	3.17358	2.43543	2.97884	1.97208	3.05632	1.94639	0.91675	1.147	1.60012	1.64504	1.06195	1.02624	1.1833	1.42368
chr12:88589934	chr12	88589934	-	Intron	Vipas39	ENSMUSG00000021038	104799	0.25	0.0833333	0.111111	0.5	0.166667	0.111111	0.111111	0.166667	0.194444	0.0833333	0.333333	0.333333	NA	0.5	NA	NA	NA	NA	NA	NA	0.111111	0.166667	4.16651	3.796	3.81997	4.40151	4.12272	3.40331	4.86121	5.38572	5.16177	5.97973	4.88239	4.95373	0.204951	0.178504	0.125931	0.124297	0.149832	0.158929	0.868254	0.57297
chr13:19704342	chr13	19704342	-	Intron	Epdr1	ENSMUSG00000002808	105298	NA	NA	NA	NA	0.047619	0.0222222	NA	0.0416667	NA	0.111111	0.0666667	NA	NA	0.166667	0.0833333	NA	NA	NA	NA	0.25	NA	NA	2.93252	3.04707	3.6061	3.61848	3.70162	2.88046	4.27699	7.07135	7.51432	7.45448	7.88251	8.05451	0.265121	0.348167	0.365075	0.381859	0.479559	0.507023	0.201508	0.400842
chr13:3602911	chr13	3602911	-	Intron	Fam208b	ENSMUSG00000033799	105203	0.0196078	0.0138889	0.0208333	NA	NA	0.00952381	0.0175439	0.0246914	0.0196078	NA	0.0111111	NA	0.0833333	0.0196078	NA	NA	NA	NA	NA	NA	NA	NA	6.17013	6.51589	6.01298	5.82972	5.97308	5.16148	6.46087	11.0619	10.3388	9.19884	9.86228	7.64758	0.929844	1.13583	1.39859	1.59824	1.2363	1.13502	2.87945	2.78896
chr13:3602923	chr13	3602923	-	Intron	Fam208b	ENSMUSG00000033799	105203	0.0185185	NA	NA	0.00980392	NA	NA	NA	NA	NA	NA	NA	NA	NA	NA	0.0196078	NA	0.025641	0.047619	NA	NA	NA	0.0833333	6.17013	6.51589	6.01298	5.82972	5.97308	5.16148	6.46087	11.0619	10.3388	9.19884	9.86228	7.64758	0.929844	1.13583	1.39859	1.59824	1.2363	1.13502	2.87945	2.78896
chr13:45859122	chr13	45859122	-	Intron	Atxn1	ENSMUSG00000046876	20238	0.116667	0.0769231	NA	NA	NA	0.0277778	0.144444	0.047619	NA	0.0333333	NA	NA	NA	NA	0.166667	NA	NA	NA	NA	NA	NA	NA	2.95525	2.41793	2.97199	3.32515	2.688	3.18061	7.32188	5.37459	6.10159	4.56525	4.50409	5.20785	0.618428	0.622438	0.701136	0.671706	0.532424	0.535347	0.5747	0.466693
chr13:55602358	chr13	55602358	-	Intron	Pdlim7	ENSMUSG00000021493	67399	0.0333333	NA	NA	NA	NA	0.0277778	NA	0.0238095	NA	NA	0.0185185	NA	NA	0.037037	NA	NA	NA	NA	NA	NA	NA	0.111111	4.03635	3.42628	3.28342	3.48214	3.10637	2.95712	31.8941	28.4181	23.8766	27.864	26.6781	26.117	5.58743	6.50645	6.16563	5.72167	4.75757	4.2108	3.85526	4.88804
chr13:99536306	chr13	99536306	-	Intron	Fcho2	ENSMUSG00000041685	218503	0.047619	0.0416667	NA	0.0239899	NA	NA	NA	0.0416667	NA	0.047619	0.136905	NA	NA	NA	NA	NA	NA	0.0666667	NA	NA	NA	NA	4.34708	4.74757	4.69797	4.48838	4.50913	4.70309	5.49236	5.79006	5.78492	5.53864	5.17713	5.36963	0.601666	0.548317	0.595392	0.727823	0.724427	0.84182	0.940949	0.887155
chr13:99562340	chr13	99562340	-	Intron	Fcho2	ENSMUSG00000041685	218503	NA	0.037037	0.025641	0.0208333	0.0416667	0.0371429	0.0890523	NA	NA	0.0333333	NA	NA	0.111111	0.0666667	NA	0.111111	NA	NA	NA	NA	NA	NA	4.34708	4.74757	4.69797	4.48838	4.50913	4.70309	5.49236	5.79006	5.78492	5.53864	5.17713	5.36963	0.601666	0.548317	0.595392	0.727823	0.724427	0.84182	0.940949	0.887155
chr13:99654781	chr13	99654781	-	Intron	Tnpo1	ENSMUSG00000009470	238799	0.0384615	NA	NA	NA	0.0123457	NA	NA	0.0104167	NA	NA	0.0339052	NA	NA	NA	NA	NA	NA	NA	0.0238095	NA	0.0333333	NA	3.04499	2.68754	2.53971	2.6862	2.37516	2.56396	11.323	8.03428	7.17824	7.47658	6.10407	6.17572	1.24123	1.27634	1.37529	1.40553	1.50065	1.57093	1.30414	1.45855
chr14:21152939	chr14	21152939	-	Intron	Ecd	ENSMUSG00000021810	70601	NA	NA	NA	0.0952381	NA	0.0277778	0.0238095	0.025641	NA	0.025641	0.0333333	NA	NA	NA	0.0833333	0.206349	NA	0.0555556	0.0888889	NA	0.0555556	NA	3.22148	5.08432	4.13632	5.44285	4.60547	5.35668	6.15637	7.95545	8.77047	7.93068	6.38504	6.55359	0.416467	0.591571	0.717273	0.819633	0.781459	0.868636	1.22597	1.29198
chr14:51396562	chr14	51396562	-	Intron	Ttc5	ENSMUSG00000006288	219022	0.0119838	0.0130334	0.0122879	0.0169688	0.0151223	0.0186992	0.0155658	0.012396	0.0167307	0.0164884	0.0173072	0.00834524	0.00981607	0.0109688	0.0130666	0.0105009	0.0108477	0.019093	0.00981663	0.00892816	0.0124033	0.0121927	1.03148	1.13676	0.668036	0.702353	0.910159	0.954363	2.2947	1.49494	1.26501	1.56757	1.13835	2.04894	0.152893	0.136507	0.0898569	0.12988	0.128193	0.152251	0.267982	0.10868
chr14:51396566	chr14	51396566	-	Intron	Ttc5	ENSMUSG00000006288	219022	0.00588574	0.0104023	0.0137524	0.0169528	0.00996812	0.0130175	0.0146846	0.014268	0.0149036	0.0171914	0.0159332	0.00903303	0.00801771	0.0083886	0.00771384	0.00530536	0.00596218	0.00842648	0.00484376	0.00579903	0.00440974	0.00371131	1.03148	1.13676	0.668036	0.702353	0.910159	0.954363	2.2947	1.49494	1.26501	1.56757	1.13835	2.04894	0.152893	0.136507	0.0898569	0.12988	0.128193	0.152251	0.267982	0.10868
chr14:58496448	chr14	58496448	-	Intron	Zdhhc20	ENSMUSG00000021969	75965	0.0666667	NA	0.0703704	0.114286	NA	0.43254	NA	NA	NA	NA	NA	NA	NA	0.333333	NA	NA	NA	NA	NA	NA	NA	0.5	2.09444	1.96506	2.05651	1.93356	1.95954	1.71498	6.24932	6.36058	6.7493	6.60816	5.56729	5.22194	0.509742	0.589284	0.516937	0.559367	0.483579	0.493735	1.57629	2.22862
chr14:62020995	chr14	62020995	-	Intron	Kpna3	ENSMUSG00000021929	16648	0.0833333	NA	NA	0.00980392	0.0196078	0.0151515	0.0222222	NA	0.0185185	0.03367	NA	NA	NA	0.0833333	NA	NA	NA	NA	0.0666667	NA	0.0833333	NA	3.69907	3.38436	3.5658	3.02846	2.92617	3.25695	2.86883	3.00386	2.59699	2.99875	2.20117	2.96565	0.522932	0.609154	0.71032	0.847745	0.775559	0.867164	1.00936	1.18997
chr14:62036594	chr14	62036594	-	Intron	Kpna3	ENSMUSG00000021929	16648	0.0833333	NA	NA	NA	NA	0.037037	0.0277778	NA	NA	NA	0.0416667	NA	NA	NA	NA	0.333333	0.0833333	NA	NA	NA	NA	NA	3.69907	3.38436	3.5658	3.02846	2.92617	3.25695	2.86883	3.00386	2.59699	2.99875	2.20117	2.96565	0.522932	0.609154	0.71032	0.847745	0.775559	0.867164	1.00936	1.18997
chr14:62036598	chr14	62036598	-	Intron	Kpna3	ENSMUSG00000021929	16648	NA	NA	NA	NA	0.037037	NA	0.0444444	NA	NA	0.1	NA	NA	NA	NA	0.111111	NA	NA	0.333333	NA	NA	0.111111	NA	3.69907	3.38436	3.5658	3.02846	2.92617	3.25695	2.86883	3.00386	2.59699	2.99875	2.20117	2.96565	0.522932	0.609154	0.71032	0.847745	0.775559	0.867164	1.00936	1.18997
chr14:62036603	chr14	62036603	-	Intron	Kpna3	ENSMUSG00000021929	16648	0.0833333	NA	NA	NA	0.037037	NA	0.0779221	0.0333333	NA	0.0333333	0.0416667	NA	NA	NA	0.111111	NA	NA	0.111111	NA	NA	NA	NA	3.69907	3.38436	3.5658	3.02846	2.92617	3.25695	2.86883	3.00386	2.59699	2.99875	2.20117	2.96565	0.522932	0.609154	0.71032	0.847745	0.775559	0.867164	1.00936	1.18997
chr14:62037069	chr14	62037069	-	Intron	Kpna3	ENSMUSG00000021929	16648	NA	0.166667	0.0277778	0.0740741	NA	NA	0.136905	NA	0.047619	NA	0.103704	NA	0.333333	NA	NA	NA	NA	NA	NA	NA	0.111111	NA	3.69907	3.38436	3.5658	3.02846	2.92617	3.25695	2.86883	3.00386	2.59699	2.99875	2.20117	2.96565	0.522932	0.609154	0.71032	0.847745	0.775559	0.867164	1.00936	1.18997
chr14:62037079	chr14	62037079	-	Intron	Kpna3	ENSMUSG00000021929	16648	NA	0.0833333	NA	0.0923077	0.0222222	NA	NA	NA	0.148148	0.037037	0.0833333	NA	0.166667	NA	NA	NA	NA	NA	NA	NA	NA	NA	3.69907	3.38436	3.5658	3.02846	2.92617	3.25695	2.86883	3.00386	2.59699	2.99875	2.20117	2.96565	0.522932	0.609154	0.71032	0.847745	0.775559	0.867164	1.00936	1.18997
chr14:62040051	chr14	62040051	-	Intron	Kpna3	ENSMUSG00000021929	16648	NA	0.015873	NA	0.0536769	0.0529412	0.0151515	NA	0.0367063	0.0555556	0.0238095	0.00980392	NA	NA	NA	NA	NA	NA	0.0833333	NA	NA	NA	NA	3.69907	3.38436	3.5658	3.02846	2.92617	3.25695	2.86883	3.00386	2.59699	2.99875	2.20117	2.96565	0.522932	0.609154	0.71032	0.847745	0.775559	0.867164	1.00936	1.18997
chr14:68312418	chr14	68312418	-	UTR	Cdca2	ENSMUSG00000048922	108912	0.0208333	NA	0.025641	0.0333333	0.0512821	NA	0.047619	NA	0.0892857	0.117544	NA	0.0666667	0.130952	0.0833333	NA	0.216667	0.047619	NA	0.0277778	0.583333	0.0888889	0.216931	9.15802	7.34453	7.10647	8.1208	7.16282	7.37832	9.20384	8.17697	10.069	10.1541	8.85885	10.5388	1.01177	0.808739	0.672713	0.645278	0.682493	0.804866	1.37121	1.37107
chr14:68312514	chr14	68312514	-	Intron	Cdca2	ENSMUSG00000048922	108912	NA	NA	NA	0.0719697	NA	NA	NA	0.0925926	0.0606061	0.025641	0.037037	NA	NA	0.0666667	NA	0.333333	NA	NA	0.222222	NA	NA	0.047619	9.15802	7.34453	7.10647	8.1208	7.16282	7.37832	9.20384	8.17697	10.069	10.1541	8.85885	10.5388	1.01177	0.808739	0.672713	0.645278	0.682493	0.804866	1.37121	1.37107
chr14:68312515	chr14	68312515	-	Intron	Cdca2	ENSMUSG00000048922	108912	0.166667	0.388278	0.361111	0.515152	0.336508	0.333333	0.227273	0.305556	0.416472	0.306777	0.434524	0.25	0.490476	0.444444	0.805556	0.625	0.616667	0.388889	0.444444	0.166667	0.518519	0.583333	9.15802	7.34453	7.10647	8.1208	7.16282	7.37832	9.20384	8.17697	10.069	10.1541	8.85885	10.5388	1.01177	0.808739	0.672713	0.645278	0.682493	0.804866	1.37121	1.37107
chr14:68312922	chr14	68312922	-	UTR	Cdca2	ENSMUSG00000048922	108912	NA	0.275	0.047619	NA	NA	0.25	0.194444	0.0555556	0.111111	0.047619	NA	0.444444	NA	0.233333	NA	0.0833333	NA	0.0833333	0.0666667	0.25	NA	0.0666667	9.15802	7.34453	7.10647	8.1208	7.16282	7.37832	9.20384	8.17697	10.069	10.1541	8.85885	10.5388	1.01177	0.808739	0.672713	0.645278	0.682493	0.804866	1.37121	1.37107
chr14:68312966	chr14	68312966	-	Exon	Cdca2	ENSMUSG00000048922	108912	0.166667	NA	0.0666667	NA	NA	NA	NA	NA	NA	NA	NA	NA	NA	0.0833333	0.166667	NA	0.333333	NA	NA	0.166667	NA	NA	9.15802	7.34453	7.10647	8.1208	7.16282	7.37832	9.20384	8.17697	10.069	10.1541	8.85885	10.5388	1.01177	0.808739	0.672713	0.645278	0.682493	0.804866	1.37121	1.37107
chr14:70895726	chr14	70895726	-	Intron	Bmp1	ENSMUSG00000022098	12153	0.166667	NA	NA	NA	0.047619	NA	NA	0.5	NA	0.0833333	NA	NA	NA	0.25	NA	NA	0.166667	0.333333	NA	NA	0.333333	NA	1.05267	0.82601	0.720744	0.844194	0.798258	0.769589	1.80081	1.17016	1.7951	1.21644	1.18907	1.43032	0.458654	0.338576	0.338781	0.313107	0.31654	0.263433	0.588533	0.563842
chr14:79768595	chr14	79768595	-	Intron	Naa16	ENSMUSG00000022020	66897	NA	NA	NA	0.0185185	NA	NA	0.0123457	NA	NA	0.030303	0.0185185	NA	0.111111	NA	NA	NA	NA	NA	0.111111	NA	NA	NA	6.26689	5.88778	5.78497	6.26842	5.40563	5.38997	11.9927	12.2351	12.0994	13.054	12.0075	13.0059	0.793226	0.797044	0.722654	0.793738	1.03408	1.26338	1.17151	1.12355
chr14:79860409	chr14	79860409	-	UTR	Wbp4	ENSMUSG00000022023	22380	0.0277778	0.015873	0.0416667	0.0719697	0.046841	0.11078	0.0451852	0.0923977	0.0651709	0.0229885	0.102852	0.0833333	NA	0.0588235	0.133333	0.037037	0.122222	NA	0.0333333	NA	NA	0.0666667	2.48938	1.84608	1.94287	2.41647	1.995	2.21303	14.4696	11.8856	11.9875	11.3283	10.9893	13.5736	0.592882	0.500232	0.33649	0.379353	0.600897	0.65035	1.04006	0.852724
chr14:99434488	chr14	99434488	-	UTR	Mzt1	ENSMUSG00000033186	76789	0.0030518	0.00740274	0.00592716	0.00580661	0.0114933	0.00545794	0.00543612	0.00282788	0.00500416	0.00786985	0.00536125	NA	0.00157978	0.00260432	0.00249234	0.00352113	0.00690957	0.00375012	0.00250627	0.00407365	NA	0.0015949	3.40657	5.08615	4.83966	5.3605	4.67716	4.91743	2.97287	4.21391	5.76694	3.89712	3.87275	3.67428	0.776625	0.896182	0.892561	0.978707	1.00691	1.0754	1.59809	1.91013
chr15:12739458	chr15	12739458	-	UTR	6030458C11Rik	ENSMUSG00000022195	77877	NA	0.0333333	NA	NA	NA	0.0277778	NA	0.00952381	NA	NA	NA	0.0253525	NA	0.0221101	NA	0.00900901	0.00724638	0.00980392	0.0106789	NA	0.0246914	NA	7.35376	8.54626	8.23755	8.61269	8.44507	7.99101	15.2325	17.2032	17.2474	18.6934	18.227	19.6281	1.45109	1.5564	1.67456	1.68895	2.26062	2.35479	1.64078	1.52009
chr15:12739626	chr15	12739626	-	UTR	6030458C11Rik	ENSMUSG00000022195	77877	0.0129946	0.0121194	0.013464	0.017663	0.0116051	0.0154412	0.00932052	0.0113936	0.0127453	0.0138817	0.0126059	0.00876833	0.010151	0.00529168	0.00892875	0.0122748	0.00790745	0.00858945	0.009324	0.0149283	0.0131348	0.0134304	7.35376	8.54626	8.23755	8.61269	8.44507	7.99101	15.2325	17.2032	17.2474	18.6934	18.227	19.6281	1.45109	1.5564	1.67456	1.68895	2.26062	2.35479	1.64078	1.52009
chr15:25309573	chr15	25309573	-	Intron	Basp1	ENSMUSG00000045763	70350	0.0416667	0.132576	0.0512821	0.0185185	0.0666667	0.0541667	0.111111	0.0899471	0.0333333	0.0606061	0.155844	0.111111	0.047619	0.111111	NA	NA	NA	0.4	0.166667	NA	NA	NA	7.94623	7.4182	7.30068	7.10289	7.00257	6.52478	10.4944	8.76877	9.34829	7.98362	5.49039	7.66046	1.83775	1.96502	1.81455	1.68189	1.2203	1.46081	2.44252	2.56572
chr15:3477726	chr15	3477726	-	Intron	Ghr	ENSMUSG00000055737	14600	0.111111	NA	0.0666667	NA	NA	0.0555556	NA	NA	0.166667	NA	0.0833333	NA	NA	NA	NA	NA	NA	NA	NA	0.5	NA	NA	3.16008	2.54021	2.94078	3.38914	2.86577	3.65092	4.29441	4.94342	5.00194	5.29763	4.84763	3.79683	0.271034	0.431184	0.355204	0.339639	0.228402	0.303461	0.234007	0.609721
chr15:3477739	chr15	3477739	-	Intron	Ghr	ENSMUSG00000055737	14600	NA	0.111111	NA	0.0833333	0.333333	NA	0.111111	0.166667	0.0416667	NA	0.333333	NA	NA	NA	NA	0.333333	NA	0.333333	NA	NA	NA	NA	3.16008	2.54021	2.94078	3.38914	2.86577	3.65092	4.29441	4.94342	5.00194	5.29763	4.84763	3.79683	0.271034	0.431184	0.355204	0.339639	0.228402	0.303461	0.234007	0.609721
chr15:3518816	chr15	3518816	-	Intron	Ghr	ENSMUSG00000055737	14600	NA	NA	NA	NA	NA	NA	NA	NA	NA	NA	NA	NA	0.025641	0.0416667	NA	NA	0.0222222	0.0333333	NA	NA	0.0952381	0.0666667	3.16008	2.54021	2.94078	3.38914	2.86577	3.65092	4.29441	4.94342	5.00194	5.29763	4.84763	3.79683	0.271034	0.431184	0.355204	0.339639	0.228402	0.303461	0.234007	0.609721
chr15:52982560	chr15	52982560	-	Intron	Ext1	ENSMUSG00000061731	14042	0.0277778	NA	0.0222222	0.0266667	0.0277778	0.025641	0.0222222	NA	NA	NA	NA	0.166667	NA	0.0175439	NA	NA	NA	0.0892857	NA	NA	NA	0.111111	3.47258	3.48524	3.66192	4.4158	3.97806	4.53269	6.21759	5.23645	5.38055	5.08167	4.54294	4.89454	1.59955	2.04044	1.86502	1.7836	1.6706	1.79072	2.33812	3.39541
chr15:53109859	chr15	53109859	-	Intron	Ext1	ENSMUSG00000061731	14042	NA	NA	0.00900901	NA	NA	NA	0.0222222	0.0128205	NA	NA	NA	NA	NA	0.030303	0.030303	NA	NA	NA	0.047619	NA	NA	NA	3.47258	3.48524	3.66192	4.4158	3.97806	4.53269	6.21759	5.23645	5.38055	5.08167	4.54294	4.89454	1.59955	2.04044	1.86502	1.7836	1.6706	1.79072	2.33812	3.39541
chr15:57928058	chr15	57928058	-	Intron	Atad2	ENSMUSG00000022360	70472	NA	0.0155039	NA	NA	NA	NA	NA	0.0151515	0.0114943	NA	0.020202	0.025641	NA	NA	NA	0.0666667	NA	NA	0.030303	NA	0.037037	NA	9.35957	7.51629	7.07291	8.06112	7.25052	8.67532	20.7211	18.246	16.132	19.3089	15.824	18.0961	2.09332	1.81641	1.59759	1.7631	1.57739	2.24736	3.17311	3.47076
chr15:57946553	chr15	57946553	-	Intron	Atad2	ENSMUSG00000022360	70472	NA	0.00705467	NA	NA	NA	NA	NA	NA	0.00490196	NA	0.00727513	0.0222222	NA	NA	0.0673759	NA	0.0151515	NA	0.00775194	NA	0.00617284	NA	9.35957	7.51629	7.07291	8.06112	7.25052	8.67532	20.7211	18.246	16.132	19.3089	15.824	18.0961	2.09332	1.81641	1.59759	1.7631	1.57739	2.24736	3.17311	3.47076
chr15:57946649	chr15	57946649	-	Intron	Atad2	ENSMUSG00000022360	70472	0.00724638	0.0197838	0.0198746	0.0151515	0.00877193	NA	NA	NA	NA	0.00411523	0.0287	0.0238095	0.0527778	0.0555556	0.100912	0.0144928	NA	0.00854701	0.0458069	NA	NA	0.0565476	9.35957	7.51629	7.07291	8.06112	7.25052	8.67532	20.7211	18.246	16.132	19.3089	15.824	18.0961	2.09332	1.81641	1.59759	1.7631	1.57739	2.24736	3.17311	3.47076
chr15:57951393	chr15	57951393	-	Intron	Atad2	ENSMUSG00000022360	70472	NA	NA	NA	0.0185676	0.010101	0.010101	0.0153277	0.0188679	0.0107527	NA	0.0286261	0.0371429	0.0555556	0.036715	0.0151515	NA	0.0238095	0.0175439	0.015873	0.0833333	0.0379867	0.0789141	9.35957	7.51629	7.07291	8.06112	7.25052	8.67532	20.7211	18.246	16.132	19.3089	15.824	18.0961	2.09332	1.81641	1.59759	1.7631	1.57739	2.24736	3.17311	3.47076
chr15:57951435	chr15	57951435	-	Intron	Atad2	ENSMUSG00000022360	70472	NA	NA	0.00724638	0.0308894	0.0270563	NA	NA	0.00813008	NA	0.0361856	0.00757576	0.0185185	0.0289855	0.0128205	0.0238095	0.0208333	0.0277778	0.075641	0.015873	NA	NA	0.0318182	9.35957	7.51629	7.07291	8.06112	7.25052	8.67532	20.7211	18.246	16.132	19.3089	15.824	18.0961	2.09332	1.81641	1.59759	1.7631	1.57739	2.24736	3.17311	3.47076
chr15:63993788	chr15	63993788	-	Intron	Asap1	ENSMUSG00000022377	13196	NA	NA	NA	0.111111	0.0151515	NA	0.0151515	0.0512821	NA	0.0166667	0.0416667	NA	NA	NA	NA	0.416667	NA	NA	NA	NA	NA	NA	8.96128	9.38512	9.29799	10.7636	8.81333	10.1353	15.3685	12.6431	9.99137	14.2543	12.3136	10.888	1.97391	2.17156	2.20453	2.22383	1.95795	1.82862	2.31625	2.34883
chr15:75758352	chr15	75758352	-	Intron	Tsta3	ENSMUSG00000022570	22122	NA	0.015873	NA	0.025641	NA	NA	0.0144928	0.0333333	NA	0.0208333	NA	0.0133333	0.0357081	0.00775194	NA	0.0227623	0.0128205	0.0175439	0.0114943	0.0357143	0.0265529	0.0320366	4.05849	2.85086	2.74972	3.04753	2.55518	2.83759	7.86514	7.49333	7.26732	7.51691	5.67614	6.05799	1.59881	1.48963	1.81593	1.71566	1.59733	1.3206	5.48849	5.64026
chr15:76602528	chr15	76602528	-	Intron	Arhgap39	ENSMUSG00000033697	223666	NA	NA	0.333333	NA	0.111111	0.333333	NA	0.111111	0.0666667	NA	NA	NA	NA	NA	NA	NA	NA	NA	NA	NA	0.333333	NA	3.33669	4.07087	5.19637	5.35257	4.75629	5.12894	1.688	3.74802	2.4377	3.2249	4.48243	3.96513	0.25503	0.307752	0.447276	0.507699	0.694168	0.667318	3.54763	3.87329
chr15:79365721	chr15	79365721	-	Intron	Ddx17	ENSMUSG00000055065	67040	0.00724638	NA	NA	NA	NA	NA	NA	NA	NA	NA	NA	0.0108551	0.00740741	0.00340136	0.00758457	0.0113968	NA	NA	0.00411523	0.0155048	NA	0.0042735	3.8419	3.43799	3.26582	3.37664	3.39927	3.44008	14.5654	13.3042	13.925	14.3539	9.69335	12.5886	3.46288	2.80459	2.38411	2.34734	2.42114	2.52283	7.73863	7.03167
chr15:81012251	chr15	81012251	-	Intron	Mkl1	ENSMUSG00000042292	223701	0.00833333	0.0208333	NA	0.0330895	0.0567901	0.00900901	0.0138889	0.0238095	NA	0.00952381	0.0123457	NA	NA	0.0555556	NA	0.111111	NA	NA	0.0666667	0.166667	0.111111	NA	3.99459	3.53482	3.28585	3.10548	3.30379	3.27516	6.01938	5.11746	6.2492	6.13449	3.79783	4.68316	1.07174	0.993492	1.00249	0.940843	0.969917	0.973623	2.42354	1.9291
chr15:98737361	chr15	98737361	-	Intron	Lmbr1l	ENSMUSG00000022999	74775	NA	NA	0.166667	NA	0.0555556	NA	NA	NA	NA	0.25	NA	NA	0.0666667	0.0666667	0.277778	0.284722	NA	NA	0.166667	NA	0.111111	0.0666667	4.39934	4.31906	3.9223	3.52247	3.92235	3.15872	6.88347	8.69804	8.71632	7.41965	5.89078	4.89618	0.441329	0.433495	0.574519	0.475662	0.367973	0.169191	0.678201	0.7629
chr15:98740400	chr15	98740400	-	Intron	Lmbr1l	ENSMUSG00000022999	74775	0.0555556	NA	NA	NA	NA	0.037037	NA	0.0555556	0.111111	NA	NA	NA	NA	0.025641	NA	NA	NA	0.0208333	NA	NA	NA	NA	4.39934	4.31906	3.9223	3.52247	3.92235	3.15872	6.88347	8.69804	8.71632	7.41965	5.89078	4.89618	0.441329	0.433495	0.574519	0.475662	0.367973	0.169191	0.678201	0.7629
chr15:98740692	chr15	98740692	-	Intron	Lmbr1l	ENSMUSG00000022999	74775	NA	NA	0.111111	NA	NA	0.0666667	0.0833333	NA	0.0666667	0.166667	NA	0.047619	0.0952381	0.126323	0.163636	0.25	0.277778	0.539683	0.166667	0.25	0.166667	0.0833333	4.39934	4.31906	3.9223	3.52247	3.92235	3.15872	6.88347	8.69804	8.71632	7.41965	5.89078	4.89618	0.441329	0.433495	0.574519	0.475662	0.367973	0.169191	0.678201	0.7629
chr15:99575157	chr15	99575157	-	Intron	Cers5	ENSMUSG00000023021	71949	0.333333	0.166667	0.693061	0.0289855	0.166667	0.638889	0.606061	0.234722	0.0578704	0.378788	0.67803	0.166667	0.025641	0.333333	0.115616	0.407407	0.0992063	0.566667	0.222222	0.363636	0.288889	0.2	2.94525	3.59653	3.44356	3.97013	3.72388	3.66804	12.0311	10.0888	9.69115	10.345	9.99309	10.3636	0.567782	0.75282	0.893336	0.897069	0.939669	1.02608	1.61309	1.54616
chr15:99702769	chr15	99702769	-	Intron	Lima1	ENSMUSG00000023022	65970	0.111111	NA	0.5	NA	NA	0.277778	NA	0.5	0.333333	0.366667	0.333333	NA	NA	NA	NA	NA	NA	NA	NA	NA	NA	NA	1.79756	2.2244	2.31889	2.41372	2.03146	2.15803	1.50292	1.47965	1.79635	1.58132	1.93086	1.91353	0.749791	0.889611	1.02938	1.08546	0.572902	0.677194	1.91788	1.97562
chr16:11157367	chr16	11157367	-	Intron	Zc3h7a	ENSMUSG00000037965	106205	NA	NA	NA	0.333333	NA	NA	NA	NA	NA	NA	NA	NA	NA	0.166667	NA	0.333333	0.166667	NA	0.111111	NA	NA	0.166667	3.10902	2.39128	2.44667	2.29219	2.4814	2.17326	6.7849	7.68954	8.90678	8.20599	4.45983	4.49276	0.596796	0.56612	0.587833	0.632188	0.417523	0.337397	3.46825	3.11583
chr16:13870586	chr16	13870586	-	Intron	Pdxdc1	ENSMUSG00000022680	94184	NA	0.0990741	0.0144928	NA	NA	0.030303	0.0222222	0.0277778	NA	NA	NA	NA	NA	NA	0.141414	NA	0.0833333	0.025641	0.0666667	NA	NA	0.130952	1.65954	2.04809	2.08962	2.17499	1.80138	1.60855	7.73519	7.07291	7.76248	7.06416	4.82862	5.82727	0.586279	0.613041	0.610293	0.601112	0.479015	0.476814	2.26052	1.68181
chr16:13871634	chr16	13871634	-	Intron	Pdxdc1	ENSMUSG00000022680	94184	0.138889	0.0555556	0.211111	0.111111	0.0892857	0.2	0.0846561	NA	0.277778	NA	0.111111	0.833333	0.333333	0.0833333	0.388889	NA	0.166667	0.166667	NA	NA	0.166667	0.333333	1.65954	2.04809	2.08962	2.17499	1.80138	1.60855	7.73519	7.07291	7.76248	7.06416	4.82862	5.82727	0.586279	0.613041	0.610293	0.601112	0.479015	0.476814	2.26052	1.68181
chr16:17677442	chr16	17677442	-	Intron	Med15	ENSMUSG00000012114	94112	NA	0.0277778	NA	NA	0.047619	NA	NA	0.025641	0.0666667	0.0208333	0.0277778	0.111111	NA	NA	0.111111	NA	0.266667	0.166667	NA	NA	0.0833333	NA	2.08894	2.6717	2.66881	2.94928	2.60665	2.64619	6.75046	7.09959	7.60503	5.80857	5.84809	5.90582	0.535314	0.538971	0.579707	0.607513	0.60087	0.656031	1.31268	1.61989
chr16:17678594	chr16	17678594	-	Intron	Med15	ENSMUSG00000012114	94112	NA	NA	0.047619	0.0740741	0.030303	NA	NA	NA	NA	NA	0.0333333	0.111111	NA	NA	NA	NA	NA	NA	NA	NA	NA	0.111111	2.08894	2.6717	2.66881	2.94928	2.60665	2.64619	6.75046	7.09959	7.60503	5.80857	5.84809	5.90582	0.535314	0.538971	0.579707	0.607513	0.60087	0.656031	1.31268	1.61989
chr16:17678679	chr16	17678679	-	Intron	Med15	ENSMUSG00000012114	94112	NA	NA	0.0833333	0.0416667	0.166667	NA	NA	0.0666667	0.0833333	0.166667	NA	0.0555556	NA	NA	NA	0.111111	NA	0.0833333	0.0555556	0.25	0.111111	NA	2.08894	2.6717	2.66881	2.94928	2.60665	2.64619	6.75046	7.09959	7.60503	5.80857	5.84809	5.90582	0.535314	0.538971	0.579707	0.607513	0.60087	0.656031	1.31268	1.61989
chr16:20402438	chr16	20402438	-	Exon	Abcc5	ENSMUSG00000022822	27416	0.025641	0.0222222	NA	NA	NA	NA	NA	NA	NA	NA	NA	0.162037	NA	0.0333333	NA	0.146465	NA	NA	NA	NA	0.0606061	NA	2.1201	2.47176	2.09631	2.6891	2.51343	2.33599	4.23885	3.97379	4.97613	4.64026	3.94221	4.2184	0.265845	0.25072	0.239577	0.250691	0.312297	0.26614	0.426654	0.310536
chr16:30357603	chr16	30357603	-	Intron	Atp13a3	ENSMUSG00000022533	224088	NA	0.0620491	0.0555556	0.0238095	NA	NA	0.0673401	0.0333333	0.148148	0.135606	0.047619	NA	NA	0.0833333	0.166667	NA	NA	NA	0.15873	0.25	0.166667	NA	1.59473	1.75798	1.45152	1.16475	1.47484	1.46884	1.45001	1.47005	1.64622	2.2352	1.07154	1.23837	0.685963	0.797821	0.874775	1.05814	0.741651	0.816182	1.30742	1.84833
chr16:52266952	chr16	52266952	-	Intron	Alcam	ENSMUSG00000022636	11658	NA	NA	NA	NA	0.030303	NA	NA	NA	NA	NA	NA	0.203704	NA	0.269841	NA	NA	NA	0.0833333	0.166667	NA	NA	0.25	2.70992	2.43644	2.06695	2.06827	2.35253	2.23852	4.68168	4.16879	5.92547	6.85002	3.41116	4.28057	0.573026	0.689763	0.622934	0.678303	0.411097	0.422917	0.910952	1.19503
chr16:52416365	chr16	52416365	-	Intron	Alcam	ENSMUSG00000022636	11658	NA	NA	NA	NA	0.0666667	NA	0.0833333	0.333333	NA	0.0555556	0.0555556	0.166667	NA	NA	0.166667	NA	NA	NA	0.166667	0.125	0.166667	0.111111	2.70992	2.43644	2.06695	2.06827	2.35253	2.23852	4.68168	4.16879	5.92547	6.85002	3.41116	4.28057	0.573026	0.689763	0.622934	0.678303	0.411097	0.422917	0.910952	1.19503
chr16:52416371	chr16	52416371	-	Intron	Alcam	ENSMUSG00000022636	11658	NA	NA	NA	0.0416667	NA	0.111111	NA	0.333333	0.333333	NA	NA	0.333333	NA	0.0833333	0.25	NA	0.388889	0.111111	NA	NA	NA	NA	2.70992	2.43644	2.06695	2.06827	2.35253	2.23852	4.68168	4.16879	5.92547	6.85002	3.41116	4.28057	0.573026	0.689763	0.622934	0.678303	0.411097	0.422917	0.910952	1.19503
chr16:55830676	chr16	55830676	-	Intron	Nfkbiz	ENSMUSG00000035356	80859	0.0666667	NA	0.0333333	0.0416667	0.0333333	NA	0.0555556	0.0833333	0.0787037	0.0833333	NA	0.0833333	0.047619	NA	0.122222	0.111111	0.0833333	0.222222	NA	NA	0.305556	NA	2.92042	2.94799	2.96647	3.18085	2.9481	2.66048	3.24585	3.0973	4.07236	4.02179	4.10443	3.19883	1.85534	1.86799	2.36705	2.59664	1.42326	1.26796	3.32339	4.00843
chr16:55830693	chr16	55830693	-	Intron	Nfkbiz	ENSMUSG00000035356	80859	NA	NA	NA	NA	NA	0.0416667	0.0555556	NA	0.125	NA	NA	NA	NA	0.166667	NA	NA	0.111111	0.111111	NA	NA	0.333333	NA	2.92042	2.94799	2.96647	3.18085	2.9481	2.66048	3.24585	3.0973	4.07236	4.02179	4.10443	3.19883	1.85534	1.86799	2.36705	2.59664	1.42326	1.26796	3.32339	4.00843
chr16:77093989	chr16	77093989	-	Intron	Usp25	ENSMUSG00000022867	30940	0.277778	0.289683	0.327778	0.558923	0.5	0.470034	0.52381	0.579762	0.546032	0.384016	0.277778	0.937322	0.897724	0.899473	0.932024	0.898479	0.943441	0.903331	0.947691	0.950595	0.933062	0.930415	0.505409	0.476126	0.525874	0.438504	0.39952	0.566273	0.85829	0.929235	0.863758	0.842909	1.22765	0.945325	0.223144	0.217437	0.216428	0.242433	0.266668	0.277375	0.0711243	0.0391796
chr16:96296026	chr16	96296026	-	Intron	Brwd1	ENSMUSG00000022914	93871	NA	NA	NA	0.195767	0.037037	0.222222	NA	0.0555556	NA	NA	NA	NA	NA	0.111111	0.0666667	NA	NA	NA	NA	NA	NA	NA	1.62616	0.960852	1.18517	1.14126	0.916324	0.986847	7.87126	5.68337	4.41201	5.37591	5.10873	4.91402	0.699995	0.806274	0.877193	0.85157	0.7659	0.67382	3.409	3.80974
chr17:23903365	chr17	23903365	-	Intron	Flywch1	ENSMUSG00000040097	224613	NA	NA	NA	NA	NA	NA	NA	NA	NA	NA	NA	NA	NA	0.0555556	0.0561594	0.0666667	0.0666667	0.166667	0.111111	0.0714286	0.0185185	0.0784314	1.04738	1.11047	1.03531	1.02074	1.02786	1.04189	6.36547	6.06404	5.98415	6.01924	5.96756	6.70629	0.498437	0.398151	0.333477	0.237054	0.363932	0.461422	0.674443	0.660509
chr17:32441534	chr17	32441534	-	UTR	Akap8	ENSMUSG00000024045	56399	0.00574713	NA	NA	0.00273224	0.00258398	NA	0.00289855	NA	0.00740741	0.00241546	0.00225225	0.00483092	NA	NA	0.00294985	NA	NA	0.00411523	NA	NA	0.00297619	NA	6.54414	8.34891	8.47173	8.36614	8.32835	8.08499	12.0149	15.8829	16.5296	16.5316	18.5769	16.3107	1.58128	2.03631	2.21808	2.09643	2.45442	2.57137	1.88643	2.08753
chr17:32441535	chr17	32441535	-	UTR	Akap8	ENSMUSG00000024045	56399	NA	0.002331	NA	0.00387597	0.00594269	0.00282486	NA	0.0021097	0.00280112	0.00462963	0.00238095	NA	NA	NA	NA	NA	NA	NA	0.00229885	NA	0.00595238	0.00311526	6.54414	8.34891	8.47173	8.36614	8.32835	8.08499	12.0149	15.8829	16.5296	16.5316	18.5769	16.3107	1.58128	2.03631	2.21808	2.09643	2.45442	2.57137	1.88643	2.08753
chr17:32441536	chr17	32441536	-	UTR	Akap8	ENSMUSG00000024045	56399	0.0123457	0.0193569	0.0192886	0.00696565	0.0331657	0.0220969	0.0267007	0.0301302	0.0332279	0.0224786	0.0108925	0.00490196	0.00940623	0.00501253	0.003367	0.00669075	0.0141026	0.0045045	0.00445712	0.00438596	0.00606261	0.00952381	6.54414	8.34891	8.47173	8.36614	8.32835	8.08499	12.0149	15.8829	16.5296	16.5316	18.5769	16.3107	1.58128	2.03631	2.21808	2.09643	2.45442	2.57137	1.88643	2.08753
chr17:33884473	chr17	33884473	-	UTR	Rab11b	ENSMUSG00000077450	19326	0.0215773	0.0302711	0.0293261	0.0287533	0.029409	0.0276579	0.0324716	0.0272325	0.0243058	0.0264377	0.028741	0.0348306	0.0293287	0.0270462	0.0322812	0.020208	0.0243933	0.0291256	0.0356357	0.0242499	0.036175	0.0269685	1.60184	1.74465	1.08251	1.31682	1.18049	1.2049	10.4027	7.56933	8.5598	9.61825	6.71103	6.81077	1.2385	1.21189	1.42096	1.32574	1.07829	0.989287	0.959397	1.05812
chr17:74651034	chr17	74651034	-	Intron	Memo1	ENSMUSG00000058704	76890	NA	NA	NA	NA	0.0196078	NA	NA	NA	NA	NA	0.0185185	NA	0.333333	NA	NA	0.111111	NA	NA	0.0833333	NA	0.111111	0.111111	2.83178	2.42535	2.85121	2.94558	2.90548	2.93652	3.29634	2.74942	3.43777	3.57635	2.0891	2.80293	0.679902	0.830251	0.910471	1.04786	0.864424	0.955005	0.721838	0.800557
chr17:74651046	chr17	74651046	-	Intron	Memo1	ENSMUSG00000058704	76890	0.103704	NA	0.0851852	0.161538	0.0580808	0.0714286	0.115741	0.0434174	0.125	0.0238095	0.157407	NA	NA	0.0666667	0.111111	NA	0.333333	NA	0.222222	NA	NA	0.166667	2.83178	2.42535	2.85121	2.94558	2.90548	2.93652	3.29634	2.74942	3.43777	3.57635	2.0891	2.80293	0.679902	0.830251	0.910471	1.04786	0.864424	0.955005	0.721838	0.800557
chr17:80446230	chr17	80446230	-	Exon	Hnrnpll	ENSMUSG00000024095	72692	NA	NA	NA	0.0196078	NA	0.0133333	NA	NA	NA	NA	NA	NA	0.0166667	0.0196078	0.0196078	NA	NA	0.0185185	0.0555556	NA	NA	NA	3.70756	3.85347	3.7296	4.58697	3.70577	3.52557	12.798	12.5064	12.1042	11.5647	10.5603	11.7054	1.1098	0.964686	0.944671	1.00665	0.900474	1.00199	0.879719	1.08753
chr17:87840054	chr17	87840054	-	Intron	Calm2	ENSMUSG00000036438	12314	0.0355556	NA	0.0138889	0.0128205	NA	0.0345622	0.0607287	0.0384615	NA	NA	0.0144928	NA	NA	NA	0.0666667	NA	0.0666667	NA	0.0555556	NA	NA	NA	3.58768	3.28858	3.55722	3.55793	3.65939	4.15022	14.7288	14.0211	12.6998	13.2481	13.6264	14.222	2.31506	2.37761	2.01583	2.27962	2.18911	2.31796	3.42235	3.16715
chr17:88412358	chr17	88412358	-	Intron	Fbxo11	ENSMUSG00000005371	225055	NA	NA	0.0416667	NA	0.177778	NA	NA	NA	0.0333333	NA	NA	NA	NA	NA	0.111111	0.166667	0.0833333	NA	0.333333	NA	NA	NA	2.71703	2.66283	2.63773	2.94574	2.5027	2.75088	0.94475	0.570011	0.934851	0.981467	1.2929	0.774149	0.932678	0.814008	0.768834	0.742434	0.761306	0.83793	2.40832	2.21031
chr18:21027491	chr18	21027491	-	Intron	Trappc8	ENSMUSG00000033382	75964	NA	0.0555556	0.15	0.0833333	0.047619	NA	0.222222	0.222222	0.0555556	0.0666667	0.133333	0.333333	0.5	NA	NA	0.333333	0.333333	0.166667	NA	NA	0.111111	0.166667	0.951745	1.06118	0.948666	0.855718	0.90588	1.07199	1.3731	1.16829	1.01423	1.14969	0.846053	0.885795	0.312768	0.253058	0.204541	0.21914	0.230522	0.26999	0.600004	0.48754
chr18:21027492	chr18	21027492	-	Intron	Trappc8	ENSMUSG00000033382	75964	NA	0.12963	0.0833333	0.166667	0.047619	NA	0.0833333	0.111111	0.0555556	0.0666667	NA	0.333333	0.5	NA	NA	NA	0.333333	0.166667	NA	NA	0.111111	0.166667	0.951745	1.06118	0.948666	0.855718	0.90588	1.07199	1.3731	1.16829	1.01423	1.14969	0.846053	0.885795	0.312768	0.253058	0.204541	0.21914	0.230522	0.26999	0.600004	0.48754
chr18:34777478	chr18	34777478	-	Intron	Brd8	ENSMUSG00000003778	78656	0.0464744	NA	0.0151515	0.0185185	NA	NA	0.0494505	0.0208333	NA	0.0392157	NA	NA	0.047619	NA	NA	0.333333	0.0833333	NA	NA	0.0625	0.361111	NA	5.37704	4.44334	4.0999	4.31473	4.16516	4.1491	13.988	11.933	11.6473	12.7645	10.6535	12.4947	1.01243	0.921822	0.926236	0.919147	0.785902	0.890652	1.74952	1.47585
chr18:35110414	chr18	35110414	-	Intron	Hspa9	ENSMUSG00000024359	15526	NA	NA	NA	NA	0.00925926	0.00694444	NA	NA	0.00757576	NA	NA	NA	0.0222222	NA	NA	0.015873	0.0333333	0.0208333	0.0397661	NA	NA	NA	15.3712	12.5788	12.165	13.4726	11.6208	13.1913	10.1515	11.3339	12.1608	12.7376	13.0206	9.97518	2.43143	3.01536	3.05504	2.88603	2.93847	3.06433	5.57041	6.16816
chr18:35110622	chr18	35110622	-	Intron	Hspa9	ENSMUSG00000024359	15526	NA	NA	NA	NA	NA	0.0228571	NA	NA	NA	0.00854701	0.0154762	NA	0.0238095	NA	NA	NA	0.0208333	0.047619	NA	NA	NA	0.0362745	15.3712	12.5788	12.165	13.4726	11.6208	13.1913	10.1515	11.3339	12.1608	12.7376	13.0206	9.97518	2.43143	3.01536	3.05504	2.88603	2.93847	3.06433	5.57041	6.16816
chr18:35110649	chr18	35110649	-	Intron	Hspa9	ENSMUSG00000024359	15526	0.018018	0.010101	0.0133333	0.0289634	NA	NA	0.0070922	0.0267411	0.0107527	0.020307	NA	0.037037	NA	NA	0.015873	NA	NA	NA	NA	NA	NA	NA	15.3712	12.5788	12.165	13.4726	11.6208	13.1913	10.1515	11.3339	12.1608	12.7376	13.0206	9.97518	2.43143	3.01536	3.05504	2.88603	2.93847	3.06433	5.57041	6.16816
chr18:53888648	chr18	53888648	-	Intron	Cep120	ENSMUSG00000048799	225523	NA	0.0666667	NA	0.0833333	NA	0.0833333	NA	NA	0.0833333	NA	0.0666667	NA	0.166667	NA	NA	NA	0.333333	NA	NA	NA	NA	NA	2.23325	1.29155	1.35246	1.55911	1.39862	1.41775	3.62284	2.18198	2.21516	2.06652	2.19014	2.98822	0.419086	0.364956	0.303176	0.2364	0.255103	0.265118	0.464014	0.589217
chr18:57116138	chr18	57116138	-	UTR	C330018D20Rik	ENSMUSG00000024592	77422	NA	0.444444	0.333333	NA	0.166667	0.111111	0.111111	0.333333	0.666667	0.166667	0.333333	0.0833333	0.388889	0.333333	NA	0.416667	0.388889	NA	0.3	0.25	0.595238	0.0833333	0.602848	0.394691	0.77343	0.709354	0.649017	0.312098	5.45375	5.76421	5.47686	5.20732	4.54596	6.20694	0.183444	0.219198	0.159617	0.133806	0.208381	0.18929	0.086525	0.200017
chr18:57116145	chr18	57116145	-	UTR	C330018D20Rik	ENSMUSG00000024592	77422	NA	0.333333	NA	0.166667	NA	NA	0.111111	0.333333	NA	NA	0.333333	NA	NA	0.0833333	NA	NA	NA	NA	NA	0.25	NA	NA	0.602848	0.394691	0.77343	0.709354	0.649017	0.312098	5.45375	5.76421	5.47686	5.20732	4.54596	6.20694	0.183444	0.219198	0.159617	0.133806	0.208381	0.18929	0.086525	0.200017
chr18:57116158	chr18	57116158	-	UTR	C330018D20Rik	ENSMUSG00000024592	77422	0.555556	NA	NA	0.166667	NA	0.0833333	NA	NA	NA	0.166667	NA	0.166667	0.166667	NA	0.166667	0.216667	0.194444	NA	0.222222	0.1	0.15	0.0833333	0.602848	0.394691	0.77343	0.709354	0.649017	0.312098	5.45375	5.76421	5.47686	5.20732	4.54596	6.20694	0.183444	0.219198	0.159617	0.133806	0.208381	0.18929	0.086525	0.200017
chr18:57116214	chr18	57116214	-	UTR	C330018D20Rik	ENSMUSG00000024592	77422	NA	NA	NA	NA	NA	NA	0.333333	0.0833333	NA	NA	NA	NA	0.222222	0.142857	0.244444	0.0833333	NA	0.111111	0.0666667	0.5	0.111111	0.0666667	0.602848	0.394691	0.77343	0.709354	0.649017	0.312098	5.45375	5.76421	5.47686	5.20732	4.54596	6.20694	0.183444	0.219198	0.159617	0.133806	0.208381	0.18929	0.086525	0.200017
chr18:57116216	chr18	57116216	-	UTR	C330018D20Rik	ENSMUSG00000024592	77422	NA	NA	NA	NA	0.166667	NA	0.166667	0.0833333	NA	0.111111	0.333333	0.5	0.555556	0.588889	0.583333	0.533333	0.555556	0.111111	0.266667	0.833333	0.683333	0.583333	0.602848	0.394691	0.77343	0.709354	0.649017	0.312098	5.45375	5.76421	5.47686	5.20732	4.54596	6.20694	0.183444	0.219198	0.159617	0.133806	0.208381	0.18929	0.086525	0.200017
chr18:57116643	chr18	57116643	-	UTR	C330018D20Rik	ENSMUSG00000024592	77422	NA	NA	0.166667	NA	0.333333	NA	NA	NA	NA	NA	NA	0.222222	0.111111	0.333333	0.244444	0.166667	0.166667	0.666667	0.0666667	0.125	0.0833333	0.266667	0.602848	0.394691	0.77343	0.709354	0.649017	0.312098	5.45375	5.76421	5.47686	5.20732	4.54596	6.20694	0.183444	0.219198	0.159617	0.133806	0.208381	0.18929	0.086525	0.200017
chr18:70684634	chr18	70684634	-	UTR	Poli	ENSMUSG00000038425	26447	0.026672	0.0370667	0.0489176	0.0430966	0.040111	0.0367123	0.0416382	0.0349061	0.0453706	0.0489249	0.046116	0.0472554	0.0310709	0.0387882	0.0424032	0.0359742	0.0526122	0.0379066	0.0372548	0.0543384	0.0499292	0.0378578	3.36787	4.84397	4.79073	5.63795	4.88878	4.97104	6.88425	8.95914	9.36786	11.1182	11.2402	11.8219	0.146141	0.139466	0.189173	0.154937	0.248974	0.297471	0.190561	0.0451539
chr19:10343432	chr19	10343432	-	Intron	Dagla	ENSMUSG00000035735	269060	0.166667	NA	0.0175439	NA	0.0185185	NA	NA	0.166667	NA	NA	0.333333	NA	NA	NA	NA	NA	NA	0.333333	NA	NA	NA	NA	1.33894	1.22978	1.38334	2.03356	1.5178	1.93988	1.96466	1.05843	0.821505	2.05663	1.35281	1.31252	0.276902	0.406382	0.426607	0.400699	0.445752	0.442366	0.676152	0.563293
chr19:10590898	chr19	10590898	-	Intron	Sdhaf2	ENSMUSG00000024668	66072	0.00720441	0.00978654	0.0115337	0.0109673	0.0110587	0.0107318	0.0105662	0.0130758	0.017592	0.0146978	0.019019	0.00848451	0.009822	0.0130142	0.0131766	0.0102687	0.0115012	0.01766	0.00903426	0.00906306	0.0173088	0.0157098	2.46121	2.14589	2.0549	2.55347	2.06317	2.46152	7.9884	7.68009	8.12297	7.64143	8.06199	6.97447	0.546577	0.470585	0.364647	0.403586	0.450784	0.518454	1.37045	1.3328
chr19:10590903	chr19	10590903	-	Intron	Sdhaf2	ENSMUSG00000024668	66072	0.0195282	0.0183549	0.0179537	0.0232276	0.0203769	0.0186722	0.0216788	0.017028	0.0247507	0.0226832	0.0243667	0.0139802	0.0100559	0.0174616	0.0169601	0.00973916	0.013506	0.0173098	0.0106898	0.0137431	0.015861	0.0230303	2.46121	2.14589	2.0549	2.55347	2.06317	2.46152	7.9884	7.68009	8.12297	7.64143	8.06199	6.97447	0.546577	0.470585	0.364647	0.403586	0.450784	0.518454	1.37045	1.3328
chr19:10950343	chr19	10950343	-	Intron	Tmem109	ENSMUSG00000034659	68539	NA	0.0833333	NA	NA	NA	0.111111	NA	0.0666667	NA	0.0952381	0.047619	NA	NA	NA	NA	NA	NA	NA	NA	NA	NA	0.0833333	5.09614	5.78774	5.56586	6.01522	5.79911	6.4628	4.39701	7.75854	7.71135	8.41827	7.95367	9.62237	0.442408	0.97751	1.05738	1.12008	1.10505	1.1481	2.91797	3.22359
chr19:10950360	chr19	10950360	-	Intron	Tmem109	ENSMUSG00000034659	68539	NA	NA	NA	NA	NA	0.030303	0.0416667	0.030303	NA	0.037037	NA	NA	NA	0.205556	NA	NA	NA	NA	NA	NA	0.111111	NA	5.09614	5.78774	5.56586	6.01522	5.79911	6.4628	4.39701	7.75854	7.71135	8.41827	7.95367	9.62237	0.442408	0.97751	1.05738	1.12008	1.10505	1.1481	2.91797	3.22359
chr19:10951965	chr19	10951965	-	Intron	Tmem109	ENSMUSG00000034659	68539	NA	NA	NA	NA	NA	NA	NA	0.037037	0.0559441	0.0333333	NA	NA	NA	NA	0.0555556	NA	0.0666667	0.194444	NA	NA	0.111111	NA	5.09614	5.78774	5.56586	6.01522	5.79911	6.4628	4.39701	7.75854	7.71135	8.41827	7.95367	9.62237	0.442408	0.97751	1.05738	1.12008	1.10505	1.1481	2.91797	3.22359
chr19:3518721	chr19	3518721	-	Intron	Ppp6r3	ENSMUSG00000024908	52036	0.030303	0.0208333	NA	0.0952381	0.030303	NA	NA	0.0208333	NA	0.0512821	NA	0.177778	NA	NA	NA	0.0833333	0.111111	NA	NA	NA	NA	NA	2.32949	2.16013	1.84765	2.08768	1.91393	1.77039	5.67509	4.60952	5.42473	3.83938	3.67549	4.7229	0.748426	0.696946	0.723732	0.666999	0.631842	0.648831	1.51222	1.72292
chr19:4340575	chr19	4340575	-	Intron	Kdm2a	ENSMUSG00000054611	225876	NA	NA	0.030303	NA	NA	NA	0.0208333	NA	NA	NA	NA	NA	0.111111	0.111111	NA	0.0833333	0.0666667	NA	NA	NA	0.0833333	NA	1.2398	0.514941	1.20855	1.11798	0.782388	1.1043	2.50845	1.54068	1.72271	1.70083	2.33054	2.3971	1.34276	1.07574	0.998826	1.02009	0.956865	0.989683	4.10025	4.10223
chr19:4358749	chr19	4358749	-	Intron	Kdm2a	ENSMUSG00000054611	225876	0.0606061	0.0416667	0.0952381	NA	NA	0.0416667	NA	NA	NA	NA	NA	NA	NA	NA	NA	NA	NA	0.333333	NA	NA	0.333333	NA	1.2398	0.514941	1.20855	1.11798	0.782388	1.1043	2.50845	1.54068	1.72271	1.70083	2.33054	2.3971	1.34276	1.07574	0.998826	1.02009	0.956865	0.989683	4.10025	4.10223
chr19:7107770	chr19	7107770	-	Intron	Stip1	ENSMUSG00000024966	20867	0.0333333	NA	0.0759259	0.0753968	NA	0.0166667	0.025641	0.0452489	NA	NA	0.0714286	0.0666667	NA	NA	0.108333	NA	NA	0.166667	0.0666667	NA	NA	NA	2.83019	2.94585	2.80476	2.64492	2.88437	2.87658	6.48198	6.44623	6.17042	6.92564	6.5072	6.56043	1.2237	1.1382	1.096	1.16552	1.22317	1.42368	2.01412	1.80488
chr19:8887379	chr19	8887379	-	Intron	Ttc9c	ENSMUSG00000071660	70387	NA	NA	NA	0.15	NA	NA	0.037037	NA	NA	NA	NA	NA	NA	0.166667	NA	NA	NA	0.0833333	NA	0.25	0.0833333	NA	7.56471	7.37827	7.2564	7.40064	7.34678	7.24405	14.5455	14.207	13.5572	14.7618	13.9994	14.8556	1.25654	1.09435	1.08107	0.956884	0.994784	1.03465	1.42356	1.3549
chr1:136677188	chr1	136677188	-	Exon	Ppp1r12b	ENSMUSG00000073557	329251	0.00186567	0.00547438	0.00299911	0.00828744	0.00998243	0.00821356	0.00908854	0.0151896	0.00936725	0.00820151	0.00915628	0.0150452	0.00427247	0.00677228	0.00155763	0.0149038	0.00167504	NA	0.00425989	0.0254237	0.00779727	0.00833333	1.82173	1.47428	1.18744	0.970536	1.46473	1.27315	4.62512	2.82164	3.73037	2.94567	3.36301	3.78637	0.15565	0.117206	0.11447	0.105723	0.0978567	0.119029	0.264665	0.0826272
chr1:136677365	chr1	136677365	-	Exon	Ppp1r12b	ENSMUSG00000073557	329251	0.0128645	0.014257	0.0278268	0.0124512	0.00912044	0.0295398	0.0172605	0.0287233	0.0129111	0.040583	0.00770134	NA	0.003003	0.00753924	0.0200153	0.00997475	0.003003	0.00628931	NA	0.02	0.00289855	0.00833333	1.82173	1.47428	1.18744	0.970536	1.46473	1.27315	4.62512	2.82164	3.73037	2.94567	3.36301	3.78637	0.15565	0.117206	0.11447	0.105723	0.0978567	0.119029	0.264665	0.0826272
chr1:145602508	chr1	145602508	-	UTR	Trove2	ENSMUSG00000018199	20822	0.037037	0.0833333	0.111111	0.166667	NA	0.037037	NA	0.133333	NA	0.333333	NA	0.176282	0.139857	0.0590635	0.106338	0.126721	0.157828	0.297036	0.0709956	0.127946	0.236438	0.205165	3.07388	2.80578	2.576	3.05962	2.93445	3.04613	3.4056	2.03336	2.2274	2.19764	2.07367	3.07479	0.269946	0.237598	0.126321	0.130483	0.200924	0.276369	0.566592	0.392277
chr1:155067828	chr1	155067828	-	UTR	Lamc1	ENSMUSG00000026478	226519	NA	0.0416667	NA	0.0774782	0.0627706	NA	0.0185185	0.0289855	0.111905	0.0549944	NA	0.0180736	0.0385989	0.0550722	0.0194609	0.0404843	0.0197464	0.0185185	0.0211183	0.0660699	0.0498499	0.032095	3.3918	4.5665	4.15218	4.59897	4.36678	4.5123	4.12019	5.11378	4.47237	4.93307	3.96476	4.98921	0.340746	0.496636	0.578418	0.734464	0.603132	0.63819	0.712714	0.820612
chr1:158357743	chr1	158357743	-	UTR	Soat1	ENSMUSG00000026600	20652	NA	0.0416667	NA	NA	0.0555556	NA	NA	0.025641	NA	NA	0.0238095	0.269841	0.122619	0.120726	NA	0.0909091	0.0333333	NA	0.0805691	NA	0.174603	0.176923	1.81177	2.79889	2.5642	2.61591	2.31143	2.34115	3.67704	5.17145	6.07491	7.52753	4.39292	4.73463	0.306403	0.499237	0.664946	0.810833	0.612238	0.512185	0.431124	0.524127
chr1:158359340	chr1	158359340	-	UTR	Soat1	ENSMUSG00000026600	20652	0.00510371	0.0087978	0.0101093	0.0100015	0.00699454	0.00994805	0.00825549	0.00885954	0.0058	0.00893077	0.00850715	0.00451209	0.00730379	0.00827683	0.00665337	0.00826136	0.00782976	0.00987872	0.00721397	0.00936263	0.00655487	0.00749819	1.81177	2.79889	2.5642	2.61591	2.31143	2.34115	3.67704	5.17145	6.07491	7.52753	4.39292	4.73463	0.306403	0.499237	0.664946	0.810833	0.612238	0.512185	0.431124	0.524127
chr1:158359358	chr1	158359358	-	UTR	Soat1	ENSMUSG00000026600	20652	0.0102024	0.0224146	0.0180988	0.0180689	0.0188266	0.0211661	0.0154494	0.017553	0.0138971	0.0235805	0.0247507	0.0228827	0.0229867	0.0159001	0.0124469	0.0131434	0.0190778	0.0187374	0.019761	0.0147059	0.0185049	0.0192119	1.81177	2.79889	2.5642	2.61591	2.31143	2.34115	3.67704	5.17145	6.07491	7.52753	4.39292	4.73463	0.306403	0.499237	0.664946	0.810833	0.612238	0.512185	0.431124	0.524127
chr1:158359369	chr1	158359369	-	UTR	Soat1	ENSMUSG00000026600	20652	0.00112233	0.00492351	0.00194013	0.00219226	0.0015131	0.00204003	0.00338542	0.00215001	0.00124844	0.00396564	0.00460397	0.00412529	0.0112358	0.0106258	0.00741383	NA	0.00751932	0.00377929	0.0138088	0.0046729	0.00222222	0.00287356	1.81177	2.79889	2.5642	2.61591	2.31143	2.34115	3.67704	5.17145	6.07491	7.52753	4.39292	4.73463	0.306403	0.499237	0.664946	0.810833	0.612238	0.512185	0.431124	0.524127
chr1:159305357	chr1	159305357	-	Intron	Rasal2	ENSMUSG00000070565	226525	0.0333333	NA	0.047619	NA	NA	0.0238095	NA	0.030303	NA	0.333333	0.0833333	0.5	NA	0.333333	0.133333	NA	0.0666667	NA	0.25	NA	0.5	NA	2.68202	1.91562	2.02421	2.13505	1.97384	2.17262	5.16543	3.91836	2.99505	4.44711	3.39793	4.32834	0.346807	0.43372	0.361084	0.401777	0.308062	0.334378	0.426845	0.48649
chr1:162943135	chr1	162943135	-	UTR	Zbtb37	ENSMUSG00000043467	240869	NA	0.0416667	NA	NA	NA	NA	NA	NA	NA	NA	0.0416667	0.111111	NA	0.0215054	0.0732601	NA	0.047619	NA	NA	NA	NA	0.0833333	9.37894	6.23395	5.46425	5.98072	5.96425	5.51703	7.26857	5.24475	6.39568	4.88901	5.12394	4.57115	0.343131	0.309079	0.263512	0.206698	0.288787	0.324944	0.178702	0.347311
chr1:164474068	chr1	164474068	-	Exon	Mettl13	ENSMUSG00000026694	71449	NA	NA	0.0114943	0.003663	0.0158645	NA	0.0149614	NA	0.0136967	0.0150794	NA	NA	NA	NA	NA	NA	NA	NA	NA	NA	NA	NA	5.32695	5.63287	5.44285	6.19526	5.72038	5.39951	3.06838	4.66572	5.72583	5.06587	6.34317	5.18233	0.252904	0.518747	0.709256	0.745166	0.791024	0.745997	0.594494	0.649777
chr1:164474075	chr1	164474075	-	Exon	Mettl13	ENSMUSG00000026694	71449	0.0148148	0.0185185	0.0168582	0.0117647	0.0261438	0.0173405	0.0152983	0.00555556	0.0169455	0.0363311	0.00740741	0.0208333	NA	NA	NA	NA	0.025641	NA	0.047619	NA	0.0222222	NA	5.32695	5.63287	5.44285	6.19526	5.72038	5.39951	3.06838	4.66572	5.72583	5.06587	6.34317	5.18233	0.252904	0.518747	0.709256	0.745166	0.791024	0.745997	0.594494	0.649777
chr1:164625591	chr1	164625591	-	Intron	Prrc2c	ENSMUSG00000040225	226562	NA	NA	NA	NA	NA	0.027972	0.0175439	0.0133333	NA	0.0242424	NA	0.111111	NA	NA	0.111111	NA	0.111111	NA	0.0416667	NA	0.037037	NA	2.14728	2.04691	2.16173	2.3087	2.31742	2.14998	6.38671	8.11007	8.11421	9.0475	7.02179	7.93944	1.08278	1.10099	1.11354	1.29768	1.33889	1.4689	1.4343	1.8931
chr1:181696728	chr1	181696728	-	Intron	Ahctf1	ENSMUSG00000026491	226747	0.010101	0.0144928	0.0119048	0.0545742	0.00813008	0.017094	0.018018	0.0493167	0.0353038	NA	0.026565	0.101732	0.0888889	0.0654762	0.0827068	0.0611111	0.0529101	NA	0.0571429	NA	0.0555556	NA	3.53984	3.95017	3.88818	4.14881	4.23247	3.7322	13.7722	13.9856	13.7205	13.9772	12.3421	11.8834	0.925092	1.083	1.22513	1.36356	1.31325	1.46989	1.87577	2.43607
chr1:181701365	chr1	181701365	-	Intron	Ahctf1	ENSMUSG00000026491	226747	0.0666667	0.0208333	NA	NA	NA	NA	0.0128205	0.0119048	NA	0.00833333	NA	NA	NA	NA	NA	NA	NA	0.0666667	NA	NA	0.0666667	NA	3.53984	3.95017	3.88818	4.14881	4.23247	3.7322	13.7722	13.9856	13.7205	13.9772	12.3421	11.8834	0.925092	1.083	1.22513	1.36356	1.31325	1.46989	1.87577	2.43607
chr1:194950342	chr1	194950342	-	Intron	Diexf	ENSMUSG00000016181	215193	NA	0.0555556	NA	NA	0.0732601	0.0175439	0.0222222	NA	0.0555556	0.0151515	NA	NA	NA	NA	NA	NA	NA	NA	NA	NA	NA	NA	4.76388	5.00899	4.55669	4.87167	4.98028	4.7075	2.82574	4.0363	4.99398	3.69366	4.63178	3.40684	0.561049	0.711395	0.801633	0.833624	0.818405	0.76774	0.998733	1.46766
chr1:51874824	chr1	51874824	-	Intron	Myo1b	ENSMUSG00000018417	17912	NA	NA	0.166667	NA	NA	0.0833333	NA	NA	0.0833333	0.166667	NA	NA	0.333333	NA	NA	NA	0.333333	NA	NA	NA	NA	NA	1.30991	1.11174	1.1079	1.29668	1.32673	1.13525	3.90633	4.74184	5.57923	4.58334	2.86449	4.03882	0.28182	0.310569	0.313152	0.292667	0.215579	0.209328	0.570612	0.592381
chr1:51874953	chr1	51874953	-	Intron	Myo1b	ENSMUSG00000018417	17912	NA	0.287037	0.133333	0.222222	0.111111	0.2	0.225397	0.0555556	0.194444	0.0606061	NA	NA	NA	NA	NA	NA	0.25	0.666667	0.333333	NA	NA	NA	1.30991	1.11174	1.1079	1.29668	1.32673	1.13525	3.90633	4.74184	5.57923	4.58334	2.86449	4.03882	0.28182	0.310569	0.313152	0.292667	0.215579	0.209328	0.570612	0.592381
chr1:79700645	chr1	79700645	-	UTR	Wdfy1	ENSMUSG00000073643	69368	0.0143541	0.023973	0.023154	0.0242334	0.0324369	0.0241875	0.020141	0.0290525	0.0177344	0.0232199	0.0339982	0.0207603	0.0481373	0.0389592	0.023007	0.00765507	0.0104575	0.0211233	0.0218057	0.0355465	0.0282674	0.0140845	2.71714	3.72039	4.0731	3.34351	3.76764	3.469	3.6298	4.47856	5.6805	5.42693	3.81144	3.44461	0.241438	0.286489	0.383857	0.378456	0.303108	0.243346	0.464232	0.370585
chr1:79700719	chr1	79700719	-	UTR	Wdfy1	ENSMUSG00000073643	69368	0.00680272	NA	0.00529101	0.00546448	0.00546448	NA	0.00490196	NA	NA	NA	0.00574713	NA	NA	0.00456621	NA	NA	NA	NA	0.00694444	0.00980392	0.00653595	0.00775194	2.71714	3.72039	4.0731	3.34351	3.76764	3.469	3.6298	4.47856	5.6805	5.42693	3.81144	3.44461	0.241438	0.286489	0.383857	0.378456	0.303108	0.243346	0.464232	0.370585
chr1:84771768	chr1	84771768	-	Intron	Trip12	ENSMUSG00000026219	14897	NA	NA	0.166667	NA	NA	NA	NA	NA	NA	0.333333	NA	0.333333	0.166667	NA	0.111111	0.166667	NA	NA	NA	NA	NA	0.166667	1.87198	1.40413	1.4832	1.86683	1.73186	1.59948	3.70117	3.62431	2.89123	2.77555	2.10921	2.85574	0.726843	0.67161	0.627071	0.592561	0.524485	0.538598	1.13167	1.18612
chr1:93289366	chr1	93289366	-	Intron	Ilkap	ENSMUSG00000026309	67444	NA	NA	0.0666667	NA	NA	0.0809524	0.037037	NA	NA	0.025641	NA	NA	0.0666667	NA	0.111111	0.0833333	0.111111	0.15	0.0666667	NA	0.2	NA	1.79281	3.16158	3.45991	3.37918	3.28835	3.08876	7.01212	6.18721	6.42946	8.27763	7.26692	6.81414	0.985294	1.25226	1.35478	1.41255	1.31022	1.54058	1.99296	1.82435
chr1:95506198	chr1	95506198	-	Intron	Farp2	ENSMUSG00000034066	227377	0.333333	NA	0.333333	0.833333	0.333333	0.666667	0.333333	0.5	0.333333	0.5	0.666667	NA	0.333333	NA	0.333333	NA	NA	NA	NA	NA	NA	0.333333	1.89616	1.95454	1.91607	2.15838	2.16012	2.21844	4.88675	5.04152	4.70934	4.35141	4.31824	5.45555	0.296118	0.37627	0.394477	0.390293	0.483743	0.43984	0.843455	1.0374
chr2:103589844	chr2	103589844	-	Intron	Nat10	ENSMUSG00000027185	98956	NA	NA	NA	NA	0.0833333	NA	NA	NA	NA	0.111111	0.0611111	0.333333	NA	NA	0.333333	NA	NA	0.333333	NA	NA	NA	NA	7.04401	7.11158	6.62816	7.40107	7.01327	6.97538	13.8275	16.6767	15.4392	18.8942	17.7231	16.8161	0.550561	0.779236	0.892839	0.939207	0.88344	0.953447	1.38916	1.59391
chr2:103589847	chr2	103589847	-	Intron	Nat10	ENSMUSG00000027185	98956	NA	0.037037	NA	0.0555556	0.0833333	0.0555556	0.047619	0.025641	NA	0.152778	0.0333333	NA	0.111111	NA	0.333333	NA	NA	0.333333	NA	NA	0.333333	NA	7.04401	7.11158	6.62816	7.40107	7.01327	6.97538	13.8275	16.6767	15.4392	18.8942	17.7231	16.8161	0.550561	0.779236	0.892839	0.939207	0.88344	0.953447	1.38916	1.59391
chr2:130543315	chr2	130543315	-	Intron	4930402H24Rik	ENSMUSG00000027309	228602	NA	0.333333	NA	NA	NA	NA	0.333333	0.333333	NA	0.166667	0.333333	NA	NA	NA	NA	NA	NA	NA	NA	0.25	NA	NA	0.756498	0.658505	0.499195	0.686687	0.530549	0.929539	2.53925	1.56407	1.41317	0.991677	1.2218	1.88669	0.159313	0.140039	0.131287	0.106356	0.0829998	0.0636796	0.345139	0.383568
chr2:146219129	chr2	146219129	-	Intron	Ralgapa2	ENSMUSG00000037110	241694	NA	0.111111	0.111111	0.166667	0.194444	0.333333	NA	0.138889	0.25	0.166667	NA	NA	NA	NA	0.333333	0.166667	0.333333	0.333333	NA	NA	NA	NA	2.86792	1.97095	1.98899	1.84969	1.83779	1.77033	4.4672	4.85337	5.50822	5.75411	4.55728	6.07417	0.161893	0.160033	0.16552	0.18065	0.235268	0.248885	0.479471	0.517176
chr2:146220207	chr2	146220207	-	Intron	Ralgapa2	ENSMUSG00000037110	241694	NA	0.0833333	NA	NA	0.0833333	NA	0.0555556	NA	0.0555556	0.15873	NA	NA	NA	NA	NA	0.166667	NA	NA	NA	NA	NA	NA	2.86792	1.97095	1.98899	1.84969	1.83779	1.77033	4.4672	4.85337	5.50822	5.75411	4.55728	6.07417	0.161893	0.160033	0.16552	0.18065	0.235268	0.248885	0.479471	0.517176
chr2:152151213	chr2	152151213	-	Intron	Rbck1	ENSMUSG00000027466	24105	NA	0.0666667	NA	NA	NA	0.047619	0.0666667	0.0606061	NA	0.0416667	NA	NA	NA	NA	NA	0.0416667	NA	NA	NA	NA	NA	NA	3.82847	4.39089	4.26032	4.50447	4.29267	4.11517	11.4372	11.9191	12.8191	12.6133	13.0832	12.0822	0.778281	0.857307	1.12897	1.16306	1.20179	1.23664	2.8118	2.63593
chr2:152151555	chr2	152151555	-	Intron	Rbck1	ENSMUSG00000027466	24105	NA	NA	0.030303	NA	NA	0.0175439	0.0196078	NA	NA	NA	NA	0.030303	0.0787037	0.0416667	0.037037	NA	NA	0.0923077	0.0277778	NA	0.0416667	0.025641	3.82847	4.39089	4.26032	4.50447	4.29267	4.11517	11.4372	11.9191	12.8191	12.6133	13.0832	12.0822	0.778281	0.857307	1.12897	1.16306	1.20179	1.23664	2.8118	2.63593
chr2:152151556	chr2	152151556	-	Intron	Rbck1	ENSMUSG00000027466	24105	NA	0.0555556	0.030303	0.037037	NA	0.0175439	0.0762527	0.0512821	0.047619	NA	0.0138889	0.361111	0.0787037	0.0833333	0.103704	NA	0.025641	0.188889	0.164286	NA	0.116667	0.126374	3.82847	4.39089	4.26032	4.50447	4.29267	4.11517	11.4372	11.9191	12.8191	12.6133	13.0832	12.0822	0.778281	0.857307	1.12897	1.16306	1.20179	1.23664	2.8118	2.63593
chr2:152151562	chr2	152151562	-	Intron	Rbck1	ENSMUSG00000027466	24105	NA	NA	0.0555556	NA	NA	NA	NA	NA	NA	NA	0.0222222	NA	NA	0.0416667	NA	0.0952381	0.0416667	NA	0.134007	NA	NA	NA	3.82847	4.39089	4.26032	4.50447	4.29267	4.11517	11.4372	11.9191	12.8191	12.6133	13.0832	12.0822	0.778281	0.857307	1.12897	1.16306	1.20179	1.23664	2.8118	2.63593
chr2:152151564	chr2	152151564	-	Intron	Rbck1	ENSMUSG00000027466	24105	NA	NA	NA	0.0277778	NA	NA	NA	NA	NA	NA	NA	NA	NA	0.0416667	0.037037	0.047619	NA	NA	0.037037	0.05	NA	NA	3.82847	4.39089	4.26032	4.50447	4.29267	4.11517	11.4372	11.9191	12.8191	12.6133	13.0832	12.0822	0.778281	0.857307	1.12897	1.16306	1.20179	1.23664	2.8118	2.63593
chr2:156780153	chr2	156780153	-	Intron	Ndrg3	ENSMUSG00000027634	29812	NA	NA	0.0833333	0.111111	0.305556	0.0666667	0.166667	NA	0.0833333	NA	0.194444	NA	NA	NA	NA	NA	NA	NA	NA	NA	0.333333	NA	1.88476	1.81177	2.05533	2.16761	1.9846	1.82995	4.16029	3.75739	4.40772	5.19068	3.75279	5.11577	0.299914	0.29074	0.229694	0.253388	0.353049	0.386293	0.560519	0.637102
chr2:157025596	chr2	157025596	-	Intron	Rbl1	ENSMUSG00000027641	19650	0.0666667	0.0555556	0.0555556	0.25	0.166667	NA	NA	0.2	0.333333	NA	NA	0.0666667	0.111111	NA	NA	0.166667	0.111111	NA	0.333333	NA	NA	0.333333	2.79318	3.47631	3.26465	3.38765	2.94367	3.34942	7.21951	4.66385	4.92382	3.76979	3.6075	5.50662	0.410773	0.318506	0.24587	0.222203	0.244357	0.308896	0.325378	0.367128
chr2:164251391	chr2	164251391	-	UTR	Sdc4	ENSMUSG00000017009	20971	0.0543672	0.0251662	0.0198693	0.0360192	0.017934	0.0192447	0.059828	0.0331336	0.01907	0.0111111	0.0227623	0.0211423	0.019199	0.0261257	0.0293359	0.0281171	0.0372036	0.0302075	0.0347672	0.0330584	0.0232179	0.0302237	3.98347	4.54738	4.4719	5.14591	4.91375	5.58236	22.4094	22.1128	19.2801	24.8168	24.1872	25.9101	2.6589	3.76387	4.13983	4.46857	3.00519	2.58113	3.1179	4.23283
chr2:177673867	chr2	177673867	-	Intron	Gm14326	ENSMUSG00000078862	665211	NA	NA	NA	NA	NA	0.0416667	NA	0.0333333	NA	NA	0.030303	NA	0.0416667	0.025641	NA	NA	0.030303	NA	0.0277778	NA	0.030303	NA	0.512258	0.749608	0.498964	0.442736	0.376674	0.369794	0.643577	0.825017	1.03174	0.895116	0.940162	1.46716	0.0889115	0.135217	0.0823881	0.109293	0.119006	0.0861922	0.152484	0.133214
chr2:177673931	chr2	177673931	-	Intron	Gm14326	ENSMUSG00000078862	665211	NA	NA	NA	NA	NA	NA	NA	NA	NA	NA	NA	0.0555556	0.0555556	0.025641	0.103175	0.0833333	NA	NA	NA	NA	0.037037	NA	0.512258	0.749608	0.498964	0.442736	0.376674	0.369794	0.643577	0.825017	1.03174	0.895116	0.940162	1.46716	0.0889115	0.135217	0.0823881	0.109293	0.119006	0.0861922	0.152484	0.133214
chr2:177673932	chr2	177673932	-	Intron	Gm14326	ENSMUSG00000078862	665211	NA	NA	NA	0.0555556	NA	0.0555556	NA	NA	0.047619	NA	NA	0.047619	0.205556	0.025641	NA	NA	NA	NA	0.0666667	NA	0.037037	NA	0.512258	0.749608	0.498964	0.442736	0.376674	0.369794	0.643577	0.825017	1.03174	0.895116	0.940162	1.46716	0.0889115	0.135217	0.0823881	0.109293	0.119006	0.0861922	0.152484	0.133214
chr2:181015544	chr2	181015544	-	Intron	Gmeb2	ENSMUSG00000038705	229004	NA	NA	NA	0.0555556	NA	0.0333333	NA	0.0666667	NA	0.108333	0.0222222	NA	NA	NA	NA	NA	NA	0.111111	0.0555556	0.125	NA	0.166667	2.53507	2.07114	2.31418	2.44861	1.9636	2.13454	6.92102	5.70934	6.56768	5.34043	5.31053	5.41988	0.689934	0.754872	0.765148	0.787725	0.70231	0.7383	0.956209	1.02341
chr2:181015549	chr2	181015549	-	Intron	Gmeb2	ENSMUSG00000038705	229004	NA	NA	0.037037	NA	0.0416667	NA	NA	NA	NA	NA	NA	NA	NA	NA	0.0833333	NA	NA	NA	0.177778	NA	0.0555556	0.0833333	2.53507	2.07114	2.31418	2.44861	1.9636	2.13454	6.92102	5.70934	6.56768	5.34043	5.31053	5.41988	0.689934	0.754872	0.765148	0.787725	0.70231	0.7383	0.956209	1.02341
chr2:181015792	chr2	181015792	-	Intron	Gmeb2	ENSMUSG00000038705	229004	0.0555556	NA	0.194444	0.277778	0.179894	NA	0.388889	0.0833333	0.222222	0.495238	0.266667	0.666667	0.5	0.5	0.333333	0.333333	0.111111	0.166667	0.0833333	0.5	0.555556	0.333333	2.53507	2.07114	2.31418	2.44861	1.9636	2.13454	6.92102	5.70934	6.56768	5.34043	5.31053	5.41988	0.689934	0.754872	0.765148	0.787725	0.70231	0.7383	0.956209	1.02341
chr2:181018866	chr2	181018866	-	Intron	Gmeb2	ENSMUSG00000038705	229004	0.116667	NA	0.175	0.025641	0.102273	NA	0.0555556	0.344444	0.132479	0.0833333	0.116667	0.166667	0.166667	0.333333	NA	NA	0.333333	NA	NA	NA	NA	NA	2.53507	2.07114	2.31418	2.44861	1.9636	2.13454	6.92102	5.70934	6.56768	5.34043	5.31053	5.41988	0.689934	0.754872	0.765148	0.787725	0.70231	0.7383	0.956209	1.02341
chr2:22886927	chr2	22886927	-	Intron	Abi1	ENSMUSG00000058835	11308	NA	NA	0.025641	NA	NA	NA	0.0196078	NA	0.0333333	NA	0.0144928	NA	0.111111	0.166667	NA	NA	0.166667	NA	0.047619	NA	NA	0.166667	1.31075	1.26216	1.25344	1.22335	1.10888	1.3444	8.29596	6.4711	8.12369	7.79921	5.83238	7.12256	0.772711	0.762309	0.693544	0.722881	0.652586	0.739539	2.24485	2.67206
chr2:22888082	chr2	22888082	-	Intron	Abi1	ENSMUSG00000058835	11308	NA	NA	NA	0.037037	NA	0.0208333	NA	0.0208333	NA	NA	0.0529412	NA	NA	NA	NA	NA	0.0666667	NA	NA	0.125	NA	NA	1.31075	1.26216	1.25344	1.22335	1.10888	1.3444	8.29596	6.4711	8.12369	7.79921	5.83238	7.12256	0.772711	0.762309	0.693544	0.722881	0.652586	0.739539	2.24485	2.67206
chr2:25385038	chr2	25385038	-	Exon	Traf2	ENSMUSG00000026942	22030	NA	NA	NA	0.047619	0.0666667	NA	NA	NA	NA	NA	0.0555556	0.166667	0.0833333	NA	NA	0.166667	0.333333	NA	NA	NA	0.166667	NA	2.16741	1.64379	1.35331	1.96979	1.60981	1.52966	8.24848	5.87371	7.38034	5.67406	6.61901	6.13991	1.25858	1.04683	1.03264	1.01962	1.29005	1.34572	1.94302	1.75737
chr2:26743186	chr2	26743186	-	intergenic	Surf6	ENSMUSG00000036160	20935	0.0117183	0.0137429	0.0145012	0.0127207	0.0112411	0.0130608	0.00865658	0.00646628	0.0104974	0.0122735	0.00950982	0.0111111	0.0100011	0.00719434	0.00798	0.00980355	0.00716787	0.0114603	0.0122169	0.00915398	0.0147402	0.0150062	4.1009	5.35316	5.27229	5.52926	5.40711	4.97262	8.13481	10.3721	10.4247	10.7957	9.73896	10.8044	1.15765	1.78831	2.05892	2.20892	1.83974	1.69967	1.14637	1.92288
chr2:26781971	chr2	26781971	-	Intron	Surf4	ENSMUSG00000014867	20932	0.148148	0.216931	0.0769231	0.0555556	0.0952381	0.219192	0.125	0.285354	0.12037	NA	0.140741	0.45	0.527778	0.240741	0.295238	0.365079	0.206349	0.2	0.122222	0.5	NA	0.0555556	1.69555	1.46948	1.54577	1.85437	1.92577	1.5812	7.14345	5.62445	4.65101	4.54244	4.71814	5.21257	2.05163	2.29054	2.03869	1.92685	2.05389	2.08779	5.96265	5.7761
chr2:30885884	chr2	30885884	-	UTR	Fnbp1	ENSMUSG00000075415	14269	0.166667	NA	0.037037	NA	NA	NA	NA	NA	0.166667	0.0555556	NA	NA	NA	NA	0.0952381	NA	NA	NA	NA	NA	0.0833333	NA	2.35789	1.64954	1.97673	1.96019	1.69761	1.89198	7.3134	7.75359	6.95462	7.89442	6.3719	6.22426	0.456366	0.42308	0.434732	0.402573	0.34261	0.326854	1.4211	1.52545
chr2:30885904	chr2	30885904	-	UTR	Fnbp1	ENSMUSG00000075415	14269	NA	0.0175439	0.037037	NA	NA	0.0555556	NA	NA	0.0333333	0.047619	0.0833333	NA	0.0208333	NA	0.047619	NA	NA	NA	0.030303	0.0909091	0.0833333	0.037037	2.35789	1.64954	1.97673	1.96019	1.69761	1.89198	7.3134	7.75359	6.95462	7.89442	6.3719	6.22426	0.456366	0.42308	0.434732	0.402573	0.34261	0.326854	1.4211	1.52545
chr2:30886452	chr2	30886452	-	UTR	Fnbp1	ENSMUSG00000075415	14269	0.0416667	NA	NA	NA	0.0666667	NA	0.0833333	NA	NA	NA	NA	NA	NA	NA	0.0416667	0.0666667	0.0952381	NA	NA	NA	NA	NA	2.35789	1.64954	1.97673	1.96019	1.69761	1.89198	7.3134	7.75359	6.95462	7.89442	6.3719	6.22426	0.456366	0.42308	0.434732	0.402573	0.34261	0.326854	1.4211	1.52545
chr2:34193217	chr2	34193217	-	Intron	Pbx3	ENSMUSG00000038718	18516	0.0666667	NA	0.111111	NA	NA	0.12037	NA	0.0416667	NA	NA	NA	NA	NA	NA	NA	NA	0.111111	NA	0.111111	NA	0.177778	NA	0.961515	1.36169	1.03998	1.24837	1.27492	1.19675	1.97655	1.40099	1.84779	1.50971	2.60381	2.2949	0.228106	0.225548	0.234063	0.275876	0.238683	0.310577	0.494372	0.325022
chr2:34591744	chr2	34591744	-	Intron	Gapvd1	ENSMUSG00000026867	66691	NA	NA	0.037037	NA	0.030303	NA	NA	NA	NA	NA	NA	NA	0.111111	NA	NA	NA	0.261111	0.166667	NA	NA	0.111111	NA	2.0954	1.92726	1.65749	2.02879	1.63794	1.7516	2.39502	2.71433	2.75655	1.66929	2.69657	2.29851	0.626996	0.683531	0.706075	0.75661	0.771977	0.842657	1.05318	0.905508
chr2:37249304	chr2	37249304	-	Intron	Rc3h2	ENSMUSG00000075376	319817	NA	0.010101	NA	NA	0.0740741	NA	NA	NA	NA	0.0196078	NA	NA	NA	0.0833333	0.222222	NA	NA	NA	NA	NA	0.0833333	NA	1.72424	1.547	1.45255	1.27079	1.20543	1.25156	9.25231	8.15915	4.97908	8.01934	6.66928	7.17965	0.805044	0.728054	0.558257	0.546333	0.564653	0.650707	1.42446	1.28405
chr2:37249318	chr2	37249318	-	Intron	Rc3h2	ENSMUSG00000075376	319817	NA	NA	0.0166667	NA	0.0208333	NA	NA	NA	0.105882	0.0333333	NA	NA	0.0833333	NA	0.111111	NA	NA	NA	NA	NA	NA	NA	1.72424	1.547	1.45255	1.27079	1.20543	1.25156	9.25231	8.15915	4.97908	8.01934	6.66928	7.17965	0.805044	0.728054	0.558257	0.546333	0.564653	0.650707	1.42446	1.28405
chr2:37270928	chr2	37270928	-	Intron	Rc3h2	ENSMUSG00000075376	319817	0.0606061	0.111111	0.030303	0.047619	0.0833333	0.0666667	0.0416667	0.157407	0.0925926	NA	0.0333333	NA	NA	NA	NA	NA	NA	0.166667	0.133333	0.125	NA	NA	1.72424	1.547	1.45255	1.27079	1.20543	1.25156	9.25231	8.15915	4.97908	8.01934	6.66928	7.17965	0.805044	0.728054	0.558257	0.546333	0.564653	0.650707	1.42446	1.28405
chr2:5807873	chr2	5807873	-	Intron	Sec61a2	ENSMUSG00000025816	57743	NA	NA	NA	0.037037	0.010101	0.0416667	0.0208333	NA	0.0144928	NA	0.0238095	NA	NA	0.0555556	0.0666667	NA	NA	NA	NA	NA	NA	0.177778	2.45684	2.59514	2.32336	2.90497	2.46187	2.5364	10.9798	10.7945	10.2838	12.4474	11.1074	11.5421	0.777126	0.970477	0.941722	1.08278	1.15041	1.27864	1.83395	1.70473
chr2:73696139	chr2	73696139	-	Intron	Atf2	ENSMUSG00000027104	11909	NA	0.178571	0.030303	NA	0.111111	NA	NA	NA	NA	0.0416667	NA	NA	NA	NA	NA	NA	0.111111	NA	0.222222	NA	NA	NA	2.87427	2.6344	2.77613	3.14559	3.26706	2.7238	8.07994	8.62628	8.37123	8.6632	6.60101	7.98043	0.538376	0.443956	0.341599	0.395818	0.391591	0.48481	1.05803	1.10455
chr2:73708499	chr2	73708499	-	Intron	Atf2	ENSMUSG00000027104	11909	NA	0.0333333	NA	NA	0.0555556	0.12037	NA	NA	0.111111	0.0333333	NA	NA	NA	0.333333	NA	NA	NA	NA	NA	NA	NA	NA	2.87427	2.6344	2.77613	3.14559	3.26706	2.7238	8.07994	8.62628	8.37123	8.6632	6.60101	7.98043	0.538376	0.443956	0.341599	0.395818	0.391591	0.48481	1.05803	1.10455
chr2:91072030	chr2	91072030	-	Intron	Ddb2	ENSMUSG00000002109	107986	0.2	NA	0.222222	NA	0.333333	NA	NA	NA	NA	NA	0.333333	NA	NA	0.333333	NA	NA	0.666667	NA	NA	NA	NA	NA	1.14506	1.00058	1.48412	1.42023	1.22463	1.08027	4.34715	2.77914	2.82581	2.9236	3.8373	3.32328	0.416415	0.259376	0.223968	0.182352	0.339941	0.276989	0.644889	0.269441
chr2:91072144	chr2	91072144	-	Intron	Ddb2	ENSMUSG00000002109	107986	0.166667	0.333333	NA	NA	0.333333	NA	NA	NA	NA	NA	0.333333	NA	NA	NA	NA	NA	0.333333	NA	NA	NA	NA	0.166667	1.14506	1.00058	1.48412	1.42023	1.22463	1.08027	4.34715	2.77914	2.82581	2.9236	3.8373	3.32328	0.416415	0.259376	0.223968	0.182352	0.339941	0.276989	0.644889	0.269441
chr3:116447000	chr3	116447000	-	UTR	Agl	ENSMUSG00000033400	77559	0.00232155	0.010909	0.0132161	0.00945271	0.00740786	0.0127742	0.00799218	0.00693345	0.0104888	0.0132945	0.0138753	0.0112462	0.0112782	0.00413292	0.0106229	0.0115181	0.00711728	0.00727828	0.00435508	0.00884973	0.00696442	0.00526406	1.63669	0.922064	1.15349	0.964776	1.25981	1.12992	5.63717	4.53779	4.60441	4.47213	2.81575	2.91832	0.361255	0.266623	0.240979	0.217471	0.156075	0.174286	0.413655	0.473233
chr3:116447001	chr3	116447001	-	UTR	Agl	ENSMUSG00000033400	77559	0.00279949	0.00343254	0.00575564	0.00278404	0.00320183	0.0015514	0.00138243	0.00456251	0.00156806	0.00374988	0.00928262	0.00425532	0.00596595	0.00218828	0.00396708	0.00370966	0.000966184	NA	0.00248001	0.0044152	0.00531927	0.00278388	1.63669	0.922064	1.15349	0.964776	1.25981	1.12992	5.63717	4.53779	4.60441	4.47213	2.81575	2.91832	0.361255	0.266623	0.240979	0.217471	0.156075	0.174286	0.413655	0.473233
chr3:116447002	chr3	116447002	-	UTR	Agl	ENSMUSG00000033400	77559	0.00452401	0.00709737	0.00381883	0.00372648	0.00722758	0.00532517	0.00506221	0.0086108	0.00421076	0.00639135	0.00852198	0.00336134	0.00751547	0.00503632	NA	0.00146843	0.00476849	0.0113989	0.00255754	0.00219298	0.005358	0.00630719	1.63669	0.922064	1.15349	0.964776	1.25981	1.12992	5.63717	4.53779	4.60441	4.47213	2.81575	2.91832	0.361255	0.266623	0.240979	0.217471	0.156075	0.174286	0.413655	0.473233
chr3:116447014	chr3	116447014	-	UTR	Agl	ENSMUSG00000033400	77559	0.0113951	0.0182616	0.0169653	0.0158931	0.0146059	0.0181666	0.0125194	0.0271914	0.0145254	0.0143812	0.0156823	0.0115805	0.0127306	0.0151865	0.0169717	0.0137411	0.00937344	0.0122161	0.0113137	0.0107615	0.0146119	0.00699913	1.63669	0.922064	1.15349	0.964776	1.25981	1.12992	5.63717	4.53779	4.60441	4.47213	2.81575	2.91832	0.361255	0.266623	0.240979	0.217471	0.156075	0.174286	0.413655	0.473233
chr3:116447015	chr3	116447015	-	UTR	Agl	ENSMUSG00000033400	77559	0.128254	0.148434	0.202919	0.195978	0.165006	0.204816	0.212698	0.183977	0.200823	0.188021	0.22336	0.184336	0.116375	0.0886462	0.140852	0.142215	0.159867	0.126936	0.111621	0.147076	0.109796	0.141286	1.63669	0.922064	1.15349	0.964776	1.25981	1.12992	5.63717	4.53779	4.60441	4.47213	2.81575	2.91832	0.361255	0.266623	0.240979	0.217471	0.156075	0.174286	0.413655	0.473233
chr3:116447036	chr3	116447036	-	UTR	Agl	ENSMUSG00000033400	77559	0.000373692	0.00261355	0.00323198	0.00138756	0.00393658	0.00199557	0.00182961	0.00636701	0.00256812	0.00463377	0.00274212	0.00171821	0.00252525	0.0010582	0.00114155	0.00226363	0.00243902	0.00179211	0.00275686	0.00170648	0.003861	0.00282486	1.63669	0.922064	1.15349	0.964776	1.25981	1.12992	5.63717	4.53779	4.60441	4.47213	2.81575	2.91832	0.361255	0.266623	0.240979	0.217471	0.156075	0.174286	0.413655	0.473233
chr3:116447037	chr3	116447037	-	UTR	Agl	ENSMUSG00000033400	77559	0.00217168	0.00387425	0.010912	0.00656024	0.00483603	0.00674481	0.00699601	0.00487349	0.0047973	0.0119712	0.00560513	0.00899356	0.00361886	0.00646176	0.00712973	0.00998814	0.00890486	0.00525603	0.0147068	0.00725073	0.0115472	0.00706132	1.63669	0.922064	1.15349	0.964776	1.25981	1.12992	5.63717	4.53779	4.60441	4.47213	2.81575	2.91832	0.361255	0.266623	0.240979	0.217471	0.156075	0.174286	0.413655	0.473233
chr3:116447040	chr3	116447040	-	UTR	Agl	ENSMUSG00000033400	77559	0.00973619	0.0155307	0.0128861	0.00977527	0.0103355	0.00931707	0.0124288	0.0104623	0.0146965	0.0111933	0.0142288	0.0192836	0.0185961	0.0219138	0.0143256	0.0125615	0.0174512	0.0232627	0.0106662	0.0190293	0.0185912	0.00651028	1.63669	0.922064	1.15349	0.964776	1.25981	1.12992	5.63717	4.53779	4.60441	4.47213	2.81575	2.91832	0.361255	0.266623	0.240979	0.217471	0.156075	0.174286	0.413655	0.473233
chr3:116447046	chr3	116447046	-	UTR	Agl	ENSMUSG00000033400	77559	0.0270455	0.0372886	0.0471649	0.0336737	0.0477257	0.0451483	0.037279	0.0461055	0.0394805	0.0586949	0.052875	0.0614311	0.0721279	0.0758548	0.0706251	0.0744354	0.0560556	0.0496991	0.0583282	0.0664221	0.0554138	0.0468571	1.63669	0.922064	1.15349	0.964776	1.25981	1.12992	5.63717	4.53779	4.60441	4.47213	2.81575	2.91832	0.361255	0.266623	0.240979	0.217471	0.156075	0.174286	0.413655	0.473233
chr3:116447064	chr3	116447064	-	UTR	Agl	ENSMUSG00000033400	77559	0.519504	0.799105	0.76965	0.767439	0.794259	0.774539	0.769991	0.793217	0.771142	0.768899	0.757868	0.637301	0.636213	0.611349	0.599664	0.61412	0.658708	0.629088	0.718473	0.719909	0.688053	0.748117	1.63669	0.922064	1.15349	0.964776	1.25981	1.12992	5.63717	4.53779	4.60441	4.47213	2.81575	2.91832	0.361255	0.266623	0.240979	0.217471	0.156075	0.174286	0.413655	0.473233
chr3:116447077	chr3	116447077	-	UTR	Agl	ENSMUSG00000033400	77559	NA	0.0014245	0.00643087	0.00556354	0.00154321	0.00584795	0.00680272	0.00233918	0.00730872	0.00120337	0.00712227	0.00512821	NA	NA	0.00320513	0.00555556	NA	NA	NA	0.0285714	0.0111712	NA	1.63669	0.922064	1.15349	0.964776	1.25981	1.12992	5.63717	4.53779	4.60441	4.47213	2.81575	2.91832	0.361255	0.266623	0.240979	0.217471	0.156075	0.174286	0.413655	0.473233
chr3:116447081	chr3	116447081	-	UTR	Agl	ENSMUSG00000033400	77559	0.00268817	NA	0.00282486	0.00682832	0.00585922	NA	0.0207924	NA	0.0394457	0.00854701	0.0104113	0.00740741	NA	0.00775194	NA	0.0577519	NA	NA	NA	NA	NA	NA	1.63669	0.922064	1.15349	0.964776	1.25981	1.12992	5.63717	4.53779	4.60441	4.47213	2.81575	2.91832	0.361255	0.266623	0.240979	0.217471	0.156075	0.174286	0.413655	0.473233
chr3:116447582	chr3	116447582	-	UTR	Agl	ENSMUSG00000033400	77559	NA	NA	0.0592593	NA	0.166667	0.0951178	NA	NA	0.0666667	0.0555556	0.0416667	0.030303	0.0392157	NA	NA	0.015873	0.0362745	0.0238095	0.0222222	0.0625	0.104345	0.0333333	1.63669	0.922064	1.15349	0.964776	1.25981	1.12992	5.63717	4.53779	4.60441	4.47213	2.81575	2.91832	0.361255	0.266623	0.240979	0.217471	0.156075	0.174286	0.413655	0.473233
chr3:116447586	chr3	116447586	-	UTR	Agl	ENSMUSG00000033400	77559	NA	NA	0.0612745	0.0175439	0.157407	0.0939394	NA	NA	0.0666667	NA	0.0559441	0.0128205	0.0166667	NA	NA	NA	NA	NA	NA	NA	0.0175439	NA	1.63669	0.922064	1.15349	0.964776	1.25981	1.12992	5.63717	4.53779	4.60441	4.47213	2.81575	2.91832	0.361255	0.266623	0.240979	0.217471	0.156075	0.174286	0.413655	0.473233
chr3:116447611	chr3	116447611	-	UTR	Agl	ENSMUSG00000033400	77559	0.0833333	0.166667	0.0416667	NA	NA	NA	NA	NA	NA	NA	0.0833333	NA	0.0128205	NA	NA	0.0119048	0.0128205	NA	0.0626781	NA	NA	NA	1.63669	0.922064	1.15349	0.964776	1.25981	1.12992	5.63717	4.53779	4.60441	4.47213	2.81575	2.91832	0.361255	0.266623	0.240979	0.217471	0.156075	0.174286	0.413655	0.473233
chr3:116447612	chr3	116447612	-	UTR	Agl	ENSMUSG00000033400	77559	0.037037	0.111111	NA	NA	0.0555556	NA	NA	NA	0.047619	NA	0.0833333	NA	NA	NA	0.00854701	NA	0.0128205	NA	0.025641	NA	0.0666667	NA	1.63669	0.922064	1.15349	0.964776	1.25981	1.12992	5.63717	4.53779	4.60441	4.47213	2.81575	2.91832	0.361255	0.266623	0.240979	0.217471	0.156075	0.174286	0.413655	0.473233
chr3:116447622	chr3	116447622	-	UTR	Agl	ENSMUSG00000033400	77559	NA	NA	NA	0.0416667	NA	NA	NA	NA	NA	NA	NA	NA	0.037037	NA	NA	0.0175439	0.0185185	0.025641	NA	0.0454545	NA	NA	1.63669	0.922064	1.15349	0.964776	1.25981	1.12992	5.63717	4.53779	4.60441	4.47213	2.81575	2.91832	0.361255	0.266623	0.240979	0.217471	0.156075	0.174286	0.413655	0.473233
chr3:135069834	chr3	135069834	-	UTR	Cisd2	ENSMUSG00000028165	67006	NA	NA	NA	NA	NA	NA	NA	NA	NA	NA	NA	0.00574713	0.0138177	0.00529101	0.00971284	NA	0.00497512	NA	NA	NA	NA	0.0130429	1.11906	1.56059	1.47555	1.62026	1.34004	1.79436	8.87051	8.35063	6.23359	8.05491	7.43025	9.30111	0.438492	0.699919	0.62139	0.5962	0.506594	0.551254	0.876677	1.25503
chr3:27522278	chr3	27522278	-	Intron	Fndc3b	ENSMUSG00000039286	72007	0.138889	0.1	NA	0.0648567	0.0767544	NA	0.025641	NA	0.101852	0.111111	NA	NA	NA	NA	NA	NA	NA	0.166667	NA	NA	0.166667	NA	4.68416	3.79958	4.07639	3.95589	4.01532	4.39763	14.1689	11.1906	12.8077	10.6338	8.81922	10.8143	1.1333	1.18886	1.22542	1.21554	0.932563	0.867032	1.84032	2.07326
chr3:38364159	chr3	38364159	-	Intron	Ankrd50	ENSMUSG00000044864	99696	NA	NA	NA	0.0666667	NA	0.0416667	0.047619	0.116667	0.0416667	0.047619	NA	NA	NA	0.166667	NA	NA	0.166667	NA	NA	NA	NA	NA	1.50486	1.32349	1.21434	0.933364	1.29181	1.22515	3.94149	3.64039	3.72831	3.94892	2.23666	3.73888	0.783707	0.95289	0.964477	1.06512	0.548681	0.485301	1.07189	1.61111
chr3:94987483	chr3	94987483	-	UTR	Gabpb2	ENSMUSG00000038766	213054	NA	NA	0.0952381	NA	NA	0.0416667	0.0416667	NA	NA	NA	0.0673401	0.0698413	0.0603486	0.0128205	0.04	0.0920716	NA	0.0277778	0.0607315	0.0294118	0.100673	0.0359848	4.89865	4.83665	4.53372	4.853	4.85704	5.21564	15.426	15.248	14.2789	15.8993	15.5338	18.3077	0.721485	0.795235	0.769444	0.831933	0.750912	0.676622	0.608943	0.68101
chr3:94987500	chr3	94987500	-	UTR	Gabpb2	ENSMUSG00000038766	213054	NA	NA	NA	NA	NA	NA	NA	0.047619	NA	NA	0.0416667	0.030303	0.042328	0.0128205	0.0222222	0.0175439	0.042328	NA	NA	NA	NA	0.031586	4.89865	4.83665	4.53372	4.853	4.85704	5.21564	15.426	15.248	14.2789	15.8993	15.5338	18.3077	0.721485	0.795235	0.769444	0.831933	0.750912	0.676622	0.608943	0.68101
chr3:94987504	chr3	94987504	-	UTR	Gabpb2	ENSMUSG00000038766	213054	NA	NA	NA	NA	NA	NA	NA	NA	0.0555556	NA	NA	0.037037	NA	0.0342105	NA	NA	0.0333333	NA	0.0318182	0.0416667	0.0614379	NA	4.89865	4.83665	4.53372	4.853	4.85704	5.21564	15.426	15.248	14.2789	15.8993	15.5338	18.3077	0.721485	0.795235	0.769444	0.831933	0.750912	0.676622	0.608943	0.68101
chr3:94987862	chr3	94987862	-	UTR	Gabpb2	ENSMUSG00000038766	213054	NA	NA	NA	NA	NA	NA	NA	0.000260417	0.000575608	NA	0.00028082	0.000502008	0.00133067	NA	0.00164204	0.000505051	0.000516796	0.000351989	NA	0.00100806	0.00190664	NA	4.89865	4.83665	4.53372	4.853	4.85704	5.21564	15.426	15.248	14.2789	15.8993	15.5338	18.3077	0.721485	0.795235	0.769444	0.831933	0.750912	0.676622	0.608943	0.68101
chr3:94987863	chr3	94987863	-	UTR	Gabpb2	ENSMUSG00000038766	213054	NA	0.0004329	NA	0.000669945	0.00058796	0.000249875	0.000613874	0.00125668	0.000629162	0.00051988	0.00023912	0.00311793	0.00151266	0.00207876	0.00269277	0.00173822	0.00228479	0.00133512	0.000771605	0.00556534	0.00739433	0.001909	4.89865	4.83665	4.53372	4.853	4.85704	5.21564	15.426	15.248	14.2789	15.8993	15.5338	18.3077	0.721485	0.795235	0.769444	0.831933	0.750912	0.676622	0.608943	0.68101
chr3:95005503	chr3	95005503	-	Intron	Gabpb2	ENSMUSG00000038766	213054	NA	NA	NA	0.0416667	0.0555556	NA	NA	0.0666667	NA	0.037037	0.138889	0.277778	NA	0.166667	NA	0.111111	NA	0.166667	NA	0.25	0.133333	NA	4.89865	4.83665	4.53372	4.853	4.85704	5.21564	15.426	15.248	14.2789	15.8993	15.5338	18.3077	0.721485	0.795235	0.769444	0.831933	0.750912	0.676622	0.608943	0.68101
chr3:95005522	chr3	95005522	-	Intron	Gabpb2	ENSMUSG00000038766	213054	NA	NA	NA	NA	NA	0.030303	0.125	0.0666667	NA	NA	0.0416667	NA	NA	NA	NA	NA	0.222222	NA	NA	0.25	NA	NA	4.89865	4.83665	4.53372	4.853	4.85704	5.21564	15.426	15.248	14.2789	15.8993	15.5338	18.3077	0.721485	0.795235	0.769444	0.831933	0.750912	0.676622	0.608943	0.68101
chr3:95006559	chr3	95006559	-	Intron	Gabpb2	ENSMUSG00000038766	213054	NA	0.0416667	NA	NA	NA	0.047619	NA	NA	0.0555556	NA	0.030303	NA	NA	NA	NA	NA	NA	0.166667	0.0666667	NA	NA	NA	4.89865	4.83665	4.53372	4.853	4.85704	5.21564	15.426	15.248	14.2789	15.8993	15.5338	18.3077	0.721485	0.795235	0.769444	0.831933	0.750912	0.676622	0.608943	0.68101
chr3:95015953	chr3	95015953	-	Intron	Gabpb2	ENSMUSG00000038766	213054	NA	NA	0.025641	0.030303	NA	NA	NA	0.0151515	NA	NA	NA	0.166667	0.111111	NA	NA	0.166667	NA	NA	NA	NA	NA	NA	4.89865	4.83665	4.53372	4.853	4.85704	5.21564	15.426	15.248	14.2789	15.8993	15.5338	18.3077	0.721485	0.795235	0.769444	0.831933	0.750912	0.676622	0.608943	0.68101
chr4:108870942	chr4	108870942	-	Intron	Osbpl9	ENSMUSG00000028559	100273	NA	NA	0.0555556	NA	0.0666667	0.0833333	NA	0.111111	NA	NA	0.114286	NA	NA	NA	NA	NA	NA	NA	NA	NA	0.333333	NA	3.38057	2.52416	2.71637	2.22917	2.68859	2.27199	7.51891	5.86572	6.34939	5.15984	3.62747	4.14228	0.520561	0.471241	0.492438	0.483282	0.445238	0.413818	1.92258	1.85198
chr4:116309921	chr4	116309921	-	Exon	Akr1a1	ENSMUSG00000028692	58810	0.00326797	NA	0.00147493	0.00225225	0.00369237	0.00389117	0.0018315	0.0044503	0.00336741	0.0034188	0.00347567	0.0159091	NA	0.00406504	NA	NA	0.00421941	NA	NA	NA	0.00497512	NA	3.7001	2.15625	2.22866	2.60497	2.27303	2.34354	13.32	10.6079	10.162	10.7787	8.87293	9.85551	1.72473	1.19806	1.18003	1.24402	1.29021	1.3775	2.53949	2.24871
chr4:116315363	chr4	116315363	-	Intron	Akr1a1	ENSMUSG00000028692	58810	0.0238095	NA	0.0714286	0.200397	NA	NA	0.194444	0.228571	0.0972222	0.308225	0.114286	NA	0.0833333	0.233333	NA	0.277778	0.222222	0.166667	NA	NA	0.333333	NA	3.7001	2.15625	2.22866	2.60497	2.27303	2.34354	13.32	10.6079	10.162	10.7787	8.87293	9.85551	1.72473	1.19806	1.18003	1.24402	1.29021	1.3775	2.53949	2.24871
chr4:125847111	chr4	125847111	-	Intron	Thrap3	ENSMUSG00000043962	230753	NA	0.0151515	NA	NA	NA	NA	NA	0.010101	0.0138889	NA	NA	0.0648148	NA	0.0833333	0.0636364	NA	NA	NA	NA	NA	0.047619	NA	7.26669	6.981	7.09331	7.98424	7.284	7.97517	15.0889	14.7248	13.6922	15.2257	12.2913	14.5102	1.92048	2.14539	2.23863	2.30537	2.11122	2.2535	2.67894	2.84268
chr4:125855842	chr4	125855842	-	Intron	Thrap3	ENSMUSG00000043962	230753	NA	NA	0.0136054	NA	0.0235018	NA	NA	NA	NA	NA	0.00980392	0.134921	0.0617284	0.130547	0.145799	0.036036	0.0650407	NA	0.023399	0.107143	0.164103	0.0740741	7.26669	6.981	7.09331	7.98424	7.284	7.97517	15.0889	14.7248	13.6922	15.2257	12.2913	14.5102	1.92048	2.14539	2.23863	2.30537	2.11122	2.2535	2.67894	2.84268
chr4:125859450	chr4	125859450	-	Intron	Thrap3	ENSMUSG00000043962	230753	NA	0.0230984	0.0222222	0.00952381	0.00980392	0.0133333	NA	NA	0.0138889	0.0208333	0.0333333	0.0208333	0.0196078	NA	0.0123457	NA	NA	NA	NA	NA	0.047619	NA	7.26669	6.981	7.09331	7.98424	7.284	7.97517	15.0889	14.7248	13.6922	15.2257	12.2913	14.5102	1.92048	2.14539	2.23863	2.30537	2.11122	2.2535	2.67894	2.84268
chr4:126572784	chr4	126572784	-	Intron	Zmym4	ENSMUSG00000042446	67785	0.0416667	0.0666667	NA	NA	NA	0.047619	0.166667	NA	NA	NA	NA	0.111111	NA	NA	NA	NA	0.166667	NA	0.111111	NA	NA	NA	1.57302	1.45925	1.13257	1.48327	0.895959	1.13655	1.28322	1.15117	1.13935	1.11554	1.41989	1.80146	0.496674	0.416265	0.389412	0.37792	0.403603	0.450357	1.27002	0.923887
chr4:126591816	chr4	126591816	-	Intron	Zmym4	ENSMUSG00000042446	67785	NA	NA	NA	0.0555556	0.047619	NA	NA	0.0416667	NA	NA	0.0277778	NA	0.111111	NA	NA	NA	NA	NA	0.133333	NA	NA	NA	1.57302	1.45925	1.13257	1.48327	0.895959	1.13655	1.28322	1.15117	1.13935	1.11554	1.41989	1.80146	0.496674	0.416265	0.389412	0.37792	0.403603	0.450357	1.27002	0.923887
chr4:128857791	chr4	128857791	-	Exon	S100pbp	ENSMUSG00000040928	74648	NA	NA	0.0666667	0.0416667	NA	NA	0.111111	NA	NA	NA	NA	0.047619	NA	NA	NA	NA	0.222222	NA	0.111111	NA	NA	NA	9.55069	7.07776	7.26301	7.07186	6.79834	6.36353	5.58154	4.24375	6.19378	5.57534	3.34128	3.54156	0.597369	0.414144	0.38191	0.386541	0.465713	0.421752	0.567069	0.466466
chr4:128858467	chr4	128858467	-	Exon	S100pbp	ENSMUSG00000040928	74648	0.037037	NA	NA	NA	0.5	NA	NA	0.0666667	0.111111	NA	NA	NA	0.416667	0.030303	NA	0.444444	0.166667	NA	0.166667	NA	NA	NA	9.55069	7.07776	7.26301	7.07186	6.79834	6.36353	5.58154	4.24375	6.19378	5.57534	3.34128	3.54156	0.597369	0.414144	0.38191	0.386541	0.465713	0.421752	0.567069	0.466466
chr4:128861905	chr4	128861905	-	Intron	S100pbp	ENSMUSG00000040928	74648	0.0555556	0.0333333	NA	0.037037	0.030303	0.0238095	0.0666667	NA	0.0416667	NA	0.0541667	NA	NA	NA	NA	NA	NA	NA	NA	NA	0.166667	NA	9.55069	7.07776	7.26301	7.07186	6.79834	6.36353	5.58154	4.24375	6.19378	5.57534	3.34128	3.54156	0.597369	0.414144	0.38191	0.386541	0.465713	0.421752	0.567069	0.466466
chr4:134405248	chr4	134405248	-	Intron	Tmem57	ENSMUSG00000028826	66146	0.0555556	NA	NA	0.037037	NA	0.173913	0.0128205	NA	0.0123457	NA	0.025641	NA	0.333333	NA	NA	NA	NA	NA	NA	NA	NA	0.166667	5.62997	6.58876	6.58801	6.22559	6.35208	6.27939	4.37565	4.69845	4.06016	3.76877	3.254	4.48656	0.558591	0.553055	0.638307	0.715655	0.577059	0.688079	0.978992	0.756213
chr4:140579747	chr4	140579747	-	Intron	Crocc	ENSMUSG00000040860	230872	NA	0.166667	NA	NA	NA	NA	0.0833333	0.333333	NA	NA	NA	0.166667	NA	0.333333	NA	NA	NA	NA	NA	NA	0.0833333	NA	3.70286	2.3386	2.59961	2.4685	2.39814	2.16569	6.02653	5.23272	5.65674	5.21027	5.59566	5.61781	0.237764	0.172127	0.160672	0.0955231	0.240622	0.211228	0.772318	0.569241
chr4:141252069	chr4	141252069	-	Intron	Ddi2	ENSMUSG00000078515	68817	NA	NA	0.0833333	0.0555556	0.0555556	NA	NA	NA	NA	0.0555556	NA	0.333333	NA	NA	NA	0.111111	NA	0.166667	NA	NA	NA	0.111111	1.71756	1.64338	1.51317	2.04436	1.5362	1.7816	6.26381	5.00183	4.0202	4.93387	4.00653	5.48253	0.905151	1.04549	1.20575	1.10527	1.28741	1.37091	1.24976	1.22458
chr4:141252584	chr4	141252584	-	Intron	Ddi2	ENSMUSG00000078515	68817	NA	0.0473856	0.0648567	0.0138889	0.0185185	0.0222222	0.0719697	0.0673077	0.0333333	0.0144928	0.034127	NA	0.0555556	0.0714286	NA	0.15	0.037037	NA	0.0666667	0.0833333	0.111111	NA	1.71756	1.64338	1.51317	2.04436	1.5362	1.7816	6.26381	5.00183	4.0202	4.93387	4.00653	5.48253	0.905151	1.04549	1.20575	1.10527	1.28741	1.37091	1.24976	1.22458
chr4:141252585	chr4	141252585	-	Intron	Ddi2	ENSMUSG00000078515	68817	0.0555556	0.0473856	0.135747	0.0416667	0.0777778	0.14	0.0706522	0.175988	0.0529412	0.0627706	0.0357143	0.111111	NA	0.214286	0.037037	0.166667	0.12963	0.0555556	0.1	0.166667	0.111111	NA	1.71756	1.64338	1.51317	2.04436	1.5362	1.7816	6.26381	5.00183	4.0202	4.93387	4.00653	5.48253	0.905151	1.04549	1.20575	1.10527	1.28741	1.37091	1.24976	1.22458
chr4:141252591	chr4	141252591	-	Intron	Ddi2	ENSMUSG00000078515	68817	NA	NA	0.0512821	0.0151515	0.0423077	0.0128205	NA	0.102183	0.0185185	0.0333333	0.030303	0.111111	0.0555556	0.0512821	NA	0.0555556	0.177778	0.277778	0.047619	NA	0.0555556	NA	1.71756	1.64338	1.51317	2.04436	1.5362	1.7816	6.26381	5.00183	4.0202	4.93387	4.00653	5.48253	0.905151	1.04549	1.20575	1.10527	1.28741	1.37091	1.24976	1.22458
chr4:41208916	chr4	41208916	-	Intron	Ubap2	ENSMUSG00000028433	68926	0.0416667	NA	0.158689	0.0596949	0.0847619	0.11459	0.081746	0.0886364	0.101388	0.0595238	0.172424	NA	NA	0.305556	0.166667	NA	0.333333	NA	0.244444	NA	0.111111	NA	9.01772	9.3155	9.19752	10.1731	8.47215	10.0657	11.2182	11.5115	10.3218	11.1443	11.5351	14.85	1.14674	1.36337	1.53199	1.75046	1.6758	1.73101	4.03736	4.09377
chr4:41208949	chr4	41208949	-	Intron	Ubap2	ENSMUSG00000028433	68926	NA	NA	0.0133333	NA	0.0196078	0.0221496	0.0144928	NA	0.0196078	0.010101	NA	NA	NA	NA	NA	NA	NA	NA	0.0555556	NA	NA	NA	9.01772	9.3155	9.19752	10.1731	8.47215	10.0657	11.2182	11.5115	10.3218	11.1443	11.5351	14.85	1.14674	1.36337	1.53199	1.75046	1.6758	1.73101	4.03736	4.09377
chr4:41211475	chr4	41211475	-	Intron	Ubap2	ENSMUSG00000028433	68926	NA	0.0143701	NA	NA	0.00520833	NA	NA	0.00396825	NA	NA	0.0245098	NA	NA	NA	0.111111	NA	NA	0.0555556	0.133333	NA	0.0166667	NA	9.01772	9.3155	9.19752	10.1731	8.47215	10.0657	11.2182	11.5115	10.3218	11.1443	11.5351	14.85	1.14674	1.36337	1.53199	1.75046	1.6758	1.73101	4.03736	4.09377
chr4:41218059	chr4	41218059	-	Intron	Ubap2	ENSMUSG00000028433	68926	0.0185185	NA	0.00490196	NA	0.0107527	NA	0.00900901	0.00617284	NA	0.0493827	NA	NA	NA	NA	NA	NA	NA	NA	NA	NA	NA	NA	9.01772	9.3155	9.19752	10.1731	8.47215	10.0657	11.2182	11.5115	10.3218	11.1443	11.5351	14.85	1.14674	1.36337	1.53199	1.75046	1.6758	1.73101	4.03736	4.09377
chr4:41241868	chr4	41241868	-	Intron	Dcaf12	ENSMUSG00000028436	68970	NA	0.15873	0.108333	NA	NA	NA	NA	NA	NA	0.00980392	NA	0.333333	NA	NA	0.333333	NA	NA	0.015873	NA	NA	0.666667	0.333333	3.26245	3.46282	3.32928	3.41475	3.59573	3.34899	14.0845	10.5389	12.6749	14.3918	8.52103	9.44016	0.95628	0.972735	0.995694	0.848759	0.699269	0.723549	1.37182	1.45799
chr4:44062038	chr4	44062038	-	Intron	Gne	ENSMUSG00000028479	50798	0.166667	0.0833333	0.166667	0.333333	NA	0.15873	NA	NA	0.25	NA	0.0952381	0.166667	NA	NA	0.333333	0.333333	0.111111	0.666667	0.166667	0.5	0.333333	NA	0.913826	1.00324	0.839624	0.62317	0.699271	0.679094	0.982138	2.00947	1.88086	1.22782	1.13178	1.4557	0.539206	0.763775	0.928842	0.956415	1.08669	1.20895	1.99902	2.16475
chr4:44062130	chr4	44062130	-	Intron	Gne	ENSMUSG00000028479	50798	0.166667	NA	0.133333	0.177778	0.111111	0.233333	0.152778	NA	NA	0.15	0.527778	0.0833333	NA	NA	0.5	NA	NA	NA	NA	NA	0.333333	0.133333	0.913826	1.00324	0.839624	0.62317	0.699271	0.679094	0.982138	2.00947	1.88086	1.22782	1.13178	1.4557	0.539206	0.763775	0.928842	0.956415	1.08669	1.20895	1.99902	2.16475
chr4:44062186	chr4	44062186	-	Intron	Gne	ENSMUSG00000028479	50798	NA	0.111111	NA	0.0666667	NA	NA	0.047619	0.0666667	0.166667	0.111111	0.0333333	0.333333	NA	0.166667	NA	NA	0.111111	0.111111	0.166667	NA	NA	0.222222	0.913826	1.00324	0.839624	0.62317	0.699271	0.679094	0.982138	2.00947	1.88086	1.22782	1.13178	1.4557	0.539206	0.763775	0.928842	0.956415	1.08669	1.20895	1.99902	2.16475
chr4:48480145	chr4	48480145	-	Intron	Tex10	ENSMUSG00000028345	269536	NA	NA	0.00617284	0.0154762	0.016369	0.017094	0.0321292	0.0185865	0.0114943	0.0138889	0.0181818	NA	0.0208333	0.030303	NA	0.0923077	0.0196078	0.0790598	0.025641	NA	NA	0.0222222	3.75008	3.85895	4.41974	4.26007	3.94606	3.50412	6.9916	8.3541	9.13953	8.05873	7.19515	7.51202	0.851714	1.13249	1.29441	1.45463	1.24587	1.19817	1.34642	1.5065
chr4:56780120	chr4	56780120	-	Intron	Ikbkap	ENSMUSG00000028431	230233	0.0666667	0.0719697	0.111111	0.235165	0.179894	0.0541667	0.148148	0.153439	0.104986	NA	0.111111	0.444444	0.194444	0.472222	NA	0.190476	0.166667	0.0555556	0.166667	0.166667	0.111111	NA	6.3309	7.00596	7.50325	7.41175	7.43526	7.0589	7.23328	9.57296	10.4879	9.8727	10.0082	10.4142	0.788018	1.03584	1.2391	1.32643	1.39351	1.34401	1.03156	1.06655
chr4:56796563	chr4	56796563	-	Intron	Ikbkap	ENSMUSG00000028431	230233	0.0208333	0.047619	0.037037	0.03663	NA	NA	0.092803	NA	0.0138889	0.025641	0.0619048	0.047619	NA	0.111111	0.15873	0.0416667	0.0666667	NA	0.047619	0.125	0.111111	0.166667	6.3309	7.00596	7.50325	7.41175	7.43526	7.0589	7.23328	9.57296	10.4879	9.8727	10.0082	10.4142	0.788018	1.03584	1.2391	1.32643	1.39351	1.34401	1.03156	1.06655
chr4:56796564	chr4	56796564	-	Intron	Ikbkap	ENSMUSG00000028431	230233	0.0208333	NA	0.0175439	0.0277778	NA	NA	0.0367063	NA	NA	NA	0.0353038	NA	NA	NA	0.047619	0.0416667	NA	NA	0.166667	0.125	NA	NA	6.3309	7.00596	7.50325	7.41175	7.43526	7.0589	7.23328	9.57296	10.4879	9.8727	10.0082	10.4142	0.788018	1.03584	1.2391	1.32643	1.39351	1.34401	1.03156	1.06655
chr4:56796569	chr4	56796569	-	Intron	Ikbkap	ENSMUSG00000028431	230233	0.0222222	NA	NA	0.0238095	0.0781663	0.0478261	0.0413534	0.0208333	0.0133333	0.025641	NA	0.047619	NA	NA	NA	NA	NA	NA	NA	NA	NA	0.0555556	6.3309	7.00596	7.50325	7.41175	7.43526	7.0589	7.23328	9.57296	10.4879	9.8727	10.0082	10.4142	0.788018	1.03584	1.2391	1.32643	1.39351	1.34401	1.03156	1.06655
chr4:56796580	chr4	56796580	-	Intron	Ikbkap	ENSMUSG00000028431	230233	NA	0.0222222	NA	NA	0.0444444	NA	NA	NA	0.0166667	NA	0.047619	NA	NA	NA	NA	NA	NA	0.0833333	NA	NA	NA	0.0833333	6.3309	7.00596	7.50325	7.41175	7.43526	7.0589	7.23328	9.57296	10.4879	9.8727	10.0082	10.4142	0.788018	1.03584	1.2391	1.32643	1.39351	1.34401	1.03156	1.06655
chr4:58821558	chr4	58821558	-	Intron	AI314180	ENSMUSG00000050812	230249	NA	NA	NA	0.0416667	0.030303	NA	0.0222222	NA	NA	0.030303	0.015873	NA	0.0416667	NA	NA	NA	NA	NA	NA	NA	NA	NA	3.31643	3.89523	4.22223	4.2806	3.70067	3.70111	7.51731	9.2469	9.43523	9.61276	8.00981	10.9506	0.759621	0.825884	0.901583	1.13518	1.13014	1.20801	1.13291	0.851769
chr4:58821573	chr4	58821573	-	Intron	AI314180	ENSMUSG00000050812	230249	0.0333333	0.030303	0.0334169	NA	NA	NA	0.030303	NA	NA	0.0185185	NA	NA	NA	0.0833333	NA	NA	0.0666667	NA	NA	NA	0.166667	NA	3.31643	3.89523	4.22223	4.2806	3.70067	3.70111	7.51731	9.2469	9.43523	9.61276	8.00981	10.9506	0.759621	0.825884	0.901583	1.13518	1.13014	1.20801	1.13291	0.851769
chr4:58821596	chr4	58821596	-	Intron	AI314180	ENSMUSG00000050812	230249	0.119298	0.0606061	NA	NA	NA	0.015873	0.0151515	0.0499109	0.047619	0.0238095	0.0175439	NA	NA	0.0589744	0.111111	0.0833333	0.047619	0.037037	0.0555556	0.0833333	NA	0.0833333	3.31643	3.89523	4.22223	4.2806	3.70067	3.70111	7.51731	9.2469	9.43523	9.61276	8.00981	10.9506	0.759621	0.825884	0.901583	1.13518	1.13014	1.20801	1.13291	0.851769
chr4:58831310	chr4	58831310	-	Intron	AI314180	ENSMUSG00000050812	230249	NA	NA	NA	0.833333	NA	0.333333	0.666667	NA	0.333333	0.333333	NA	NA	0.333333	NA	NA	NA	NA	NA	NA	NA	NA	NA	3.31643	3.89523	4.22223	4.2806	3.70067	3.70111	7.51731	9.2469	9.43523	9.61276	8.00981	10.9506	0.759621	0.825884	0.901583	1.13518	1.13014	1.20801	1.13291	0.851769
chr4:58831320	chr4	58831320	-	Intron	AI314180	ENSMUSG00000050812	230249	NA	0.444444	0.222222	1	0.305556	0.333333	0.555556	0.166667	0.333333	0.333333	0.166667	NA	0.333333	NA	NA	NA	0.5	NA	NA	NA	0.333333	NA	3.31643	3.89523	4.22223	4.2806	3.70067	3.70111	7.51731	9.2469	9.43523	9.61276	8.00981	10.9506	0.759621	0.825884	0.901583	1.13518	1.13014	1.20801	1.13291	0.851769
chr4:58902724	chr4	58902724	-	Intron	AI314180	ENSMUSG00000050812	230249	NA	NA	0.0166667	0.0208333	0.0208333	0.0555556	NA	NA	NA	NA	0.0333333	NA	NA	NA	NA	NA	NA	NA	NA	NA	NA	0.333333	3.31643	3.89523	4.22223	4.2806	3.70067	3.70111	7.51731	9.2469	9.43523	9.61276	8.00981	10.9506	0.759621	0.825884	0.901583	1.13518	1.13014	1.20801	1.13291	0.851769
chr5:102427936	chr5	102427936	-	Intron	Wdfy3	ENSMUSG00000043940	72145	0.0114943	0.0185185	NA	NA	0.030303	0.037037	0.0119048	NA	NA	NA	0.0333333	NA	NA	0.333333	0.272727	NA	NA	NA	NA	NA	NA	NA	1.72724	0.985377	1.29553	1.35453	1.20388	0.845725	4.46067	2.88381	3.87063	4.62879	3.4138	4.43148	0.514136	0.529528	0.526398	0.504574	0.503402	0.463852	0.726561	0.92615
chr5:113516831	chr5	113516831	-	UTR	2900026A02Rik	ENSMUSG00000051339	243219	NA	NA	0.0222222	NA	NA	NA	NA	0.0114943	NA	NA	NA	0.0107527	NA	0.0128205	NA	0.00724638	0.00952381	0.00512821	NA	NA	0.0123457	NA	4.26062	3.8186	3.40709	3.40786	3.39954	3.02449	4.33364	3.75392	3.71555	3.78459	3.49688	3.90036	0.811828	0.882322	0.905183	0.774233	0.821036	0.853596	2.01587	2.5258
chr5:113516833	chr5	113516833	-	UTR	2900026A02Rik	ENSMUSG00000051339	243219	NA	NA	0.0107527	NA	0.00724638	0.0104167	NA	NA	NA	NA	NA	NA	NA	NA	0.0151818	0.0128205	NA	NA	0.00740741	NA	0.0340996	0.0444444	4.26062	3.8186	3.40709	3.40786	3.39954	3.02449	4.33364	3.75392	3.71555	3.78459	3.49688	3.90036	0.811828	0.882322	0.905183	0.774233	0.821036	0.853596	2.01587	2.5258
chr5:113516841	chr5	113516841	-	UTR	2900026A02Rik	ENSMUSG00000051339	243219	NA	NA	NA	0.04375	NA	NA	NA	0.0133333	NA	0.0119048	0.0133333	NA	0.00757576	0.0119048	0.00595238	NA	0.0111111	NA	0.00740741	NA	NA	0.0133333	4.26062	3.8186	3.40709	3.40786	3.39954	3.02449	4.33364	3.75392	3.71555	3.78459	3.49688	3.90036	0.811828	0.882322	0.905183	0.774233	0.821036	0.853596	2.01587	2.5258
chr5:113516842	chr5	113516842	-	UTR	2900026A02Rik	ENSMUSG00000051339	243219	NA	NA	NA	0.030303	NA	NA	NA	NA	0.0123457	NA	NA	NA	0.00757576	NA	NA	0.00724638	0.00900901	NA	NA	0.0128205	0.0111111	NA	4.26062	3.8186	3.40709	3.40786	3.39954	3.02449	4.33364	3.75392	3.71555	3.78459	3.49688	3.90036	0.811828	0.882322	0.905183	0.774233	0.821036	0.853596	2.01587	2.5258
chr5:113516847	chr5	113516847	-	UTR	2900026A02Rik	ENSMUSG00000051339	243219	NA	0.00925926	NA	0.0232647	0.0141908	NA	0.0232372	0.02375	NA	0.0128205	0.0238095	0.0470562	0.0423341	0.0509578	0.030303	0.037415	0.0431849	0.0213675	0.0753448	0.0422474	0.0283224	0.0128205	4.26062	3.8186	3.40709	3.40786	3.39954	3.02449	4.33364	3.75392	3.71555	3.78459	3.49688	3.90036	0.811828	0.882322	0.905183	0.774233	0.821036	0.853596	2.01587	2.5258
chr5:113516854	chr5	113516854	-	UTR	2900026A02Rik	ENSMUSG00000051339	243219	0.0276361	0.0665205	0.0333333	0.0470035	0.00666667	0.0215278	0.0710824	0.020202	0.025641	0.130435	0.0676768	0.0128205	0.0296323	0.0121574	0.00606061	0.00653595	0.0344186	0.0387597	0.0310451	0.0111111	0.0390361	0.054942	4.26062	3.8186	3.40709	3.40786	3.39954	3.02449	4.33364	3.75392	3.71555	3.78459	3.49688	3.90036	0.811828	0.882322	0.905183	0.774233	0.821036	0.853596	2.01587	2.5258
chr5:113516999	chr5	113516999	-	UTR	2900026A02Rik	ENSMUSG00000051339	243219	0.025641	NA	NA	NA	NA	NA	NA	NA	0.025641	NA	NA	0.00833333	0.0175439	NA	NA	0.0144928	0.00854701	0.0208333	0.00877193	NA	NA	0.0185185	4.26062	3.8186	3.40709	3.40786	3.39954	3.02449	4.33364	3.75392	3.71555	3.78459	3.49688	3.90036	0.811828	0.882322	0.905183	0.774233	0.821036	0.853596	2.01587	2.5258
chr5:113517004	chr5	113517004	-	UTR	2900026A02Rik	ENSMUSG00000051339	243219	NA	NA	NA	0.0208333	NA	NA	NA	NA	NA	NA	NA	NA	0.0104167	0.00952381	NA	0.0128205	0.00757576	NA	0.01875	NA	0.015873	0.0166667	4.26062	3.8186	3.40709	3.40786	3.39954	3.02449	4.33364	3.75392	3.71555	3.78459	3.49688	3.90036	0.811828	0.882322	0.905183	0.774233	0.821036	0.853596	2.01587	2.5258
chr5:113517008	chr5	113517008	-	UTR	2900026A02Rik	ENSMUSG00000051339	243219	0.0222222	NA	NA	NA	NA	NA	0.047619	NA	0.030303	NA	NA	NA	NA	0.00877193	0.0215054	0.0119048	NA	NA	NA	NA	NA	NA	4.26062	3.8186	3.40709	3.40786	3.39954	3.02449	4.33364	3.75392	3.71555	3.78459	3.49688	3.90036	0.811828	0.882322	0.905183	0.774233	0.821036	0.853596	2.01587	2.5258
chr5:113517027	chr5	113517027	-	UTR	2900026A02Rik	ENSMUSG00000051339	243219	NA	0.119048	NA	0.148148	NA	0.173993	0.0910364	0.117647	0.0512821	0.22381	0.0833333	NA	0.031746	0.0107527	0.0421785	0.00952381	NA	0.0217087	NA	NA	0.0128205	0.0211694	4.26062	3.8186	3.40709	3.40786	3.39954	3.02449	4.33364	3.75392	3.71555	3.78459	3.49688	3.90036	0.811828	0.882322	0.905183	0.774233	0.821036	0.853596	2.01587	2.5258
chr5:113517032	chr5	113517032	-	UTR	2900026A02Rik	ENSMUSG00000051339	243219	NA	NA	NA	NA	NA	0.0166667	NA	NA	NA	NA	0.015873	0.00925926	0.0107527	NA	NA	0.00900901	NA	0.00900901	0.0070922	0.0217391	NA	NA	4.26062	3.8186	3.40709	3.40786	3.39954	3.02449	4.33364	3.75392	3.71555	3.78459	3.49688	3.90036	0.811828	0.882322	0.905183	0.774233	0.821036	0.853596	2.01587	2.5258
chr5:113517035	chr5	113517035	-	UTR	2900026A02Rik	ENSMUSG00000051339	243219	NA	0.0208333	NA	NA	NA	NA	NA	NA	0.0196078	NA	NA	NA	0.00980392	NA	0.00854701	0.0165056	0.00900901	0.0301519	NA	0.0166667	0.0238095	0.020202	4.26062	3.8186	3.40709	3.40786	3.39954	3.02449	4.33364	3.75392	3.71555	3.78459	3.49688	3.90036	0.811828	0.882322	0.905183	0.774233	0.821036	0.853596	2.01587	2.5258
chr5:113517036	chr5	113517036	-	UTR	2900026A02Rik	ENSMUSG00000051339	243219	NA	NA	NA	0.0144928	0.0111111	NA	0.0166667	0.0277778	NA	0.0277778	NA	NA	NA	0.00606061	NA	NA	NA	NA	0.00641026	NA	NA	0.010101	4.26062	3.8186	3.40709	3.40786	3.39954	3.02449	4.33364	3.75392	3.71555	3.78459	3.49688	3.90036	0.811828	0.882322	0.905183	0.774233	0.821036	0.853596	2.01587	2.5258
chr5:124151802	chr5	124151802	-	Intron	Zcchc8	ENSMUSG00000029427	70650	0.0555556	0.0512821	NA	0.0666667	NA	0.047619	0.212121	0.0666667	NA	NA	0.0277778	0.0555556	0.0753968	0.166667	NA	0.0416667	0.244444	0.0833333	NA	0.333333	NA	0.0555556	3.08412	2.68021	2.2481	2.65697	2.06958	2.56565	7.60368	6.39844	6.30774	6.54609	4.6715	6.83683	1.03614	0.824937	0.646326	0.681664	0.778915	0.89881	1.44755	1.33471
chr5:135884725	chr5	135884725	-	UTR	Hip1	ENSMUSG00000039959	215114	NA	NA	0.111111	NA	NA	NA	NA	NA	NA	NA	NA	0.0175439	0.0899471	0.0238332	0.0166667	NA	NA	0.047504	NA	NA	0.0555556	0.0238095	3.19569	2.29404	2.17779	2.14095	2.74896	2.28464	1.80225	1.62284	1.99675	1.27289	1.66233	1.78578	0.310336	0.238159	0.25945	0.227844	0.32819	0.275348	0.951796	0.837958
chr5:135884731	chr5	135884731	-	UTR	Hip1	ENSMUSG00000039959	215114	NA	0.111111	NA	NA	0.0666667	NA	NA	NA	NA	NA	NA	NA	NA	0.0185185	0.0185185	0.0407407	NA	0.0196078	NA	NA	0.015873	NA	3.19569	2.29404	2.17779	2.14095	2.74896	2.28464	1.80225	1.62284	1.99675	1.27289	1.66233	1.78578	0.310336	0.238159	0.25945	0.227844	0.32819	0.275348	0.951796	0.837958
chr5:136394761	chr5	136394761	-	Intron	Ywhag	ENSMUSG00000051391	22628	NA	0.025641	NA	0.0851852	0.030303	NA	0.0208333	0.0208333	0.0238095	NA	NA	NA	NA	NA	NA	NA	NA	0.0833333	NA	NA	NA	0.0833333	7.56581	6.36229	7.12128	6.48812	6.60564	7.02765	18.1644	19.6067	18.1986	19.0425	15.3227	15.975	3.11924	4.73509	5.10232	4.68276	3.62632	3.70559	3.60514	3.6128
chr5:136398932	chr5	136398932	-	Intron	Ywhag	ENSMUSG00000051391	22628	0.047619	NA	0.0374194	0.00854701	NA	0.00793651	NA	0.0114943	NA	0.031746	NA	NA	0.0666667	NA	NA	NA	0.0666667	NA	NA	NA	0.103175	NA	7.56581	6.36229	7.12128	6.48812	6.60564	7.02765	18.1644	19.6067	18.1986	19.0425	15.3227	15.975	3.11924	4.73509	5.10232	4.68276	3.62632	3.70559	3.60514	3.6128
chr5:136399727	chr5	136399727	-	Intron	Ywhag	ENSMUSG00000051391	22628	NA	0.0175439	NA	0.0133333	NA	NA	0.0151515	NA	NA	0.0777778	0.0392157	NA	NA	NA	NA	NA	NA	0.166667	NA	NA	NA	NA	7.56581	6.36229	7.12128	6.48812	6.60564	7.02765	18.1644	19.6067	18.1986	19.0425	15.3227	15.975	3.11924	4.73509	5.10232	4.68276	3.62632	3.70559	3.60514	3.6128
chr5:138583293	chr5	138583293	-	UTR	Zfp113	ENSMUSG00000037007	56314	0.00689504	0.00740185	0.00735708	0.0082192	0.00664873	0.00912276	0.00571119	0.00833301	0.00728572	0.0107539	0.00802803	0.00352168	0.0015015	0.00760298	0.00293255	0.00759462	0.00200803	0.00500768	0.00481029	0.00806452	0.00530255	0.00185185	2.55919	2.27078	2.31281	2.04846	1.93291	1.69972	7.88235	7.42884	9.42331	7.43147	7.36919	6.81224	0.761919	0.587017	0.567606	0.445136	0.544865	0.577149	1.50111	1.14297
chr5:20343986	chr5	20343986	-	Intron	Phtf2	ENSMUSG00000039987	68770	0.0333333	0.0555556	NA	0.0128205	0.0208333	0.0123457	NA	0.0151515	NA	0.0111111	NA	NA	NA	NA	NA	NA	NA	NA	NA	NA	NA	NA	3.80209	4.56196	4.73677	4.9278	4.21052	4.45109	4.52515	4.1243	2.20325	4.21924	4.0312	5.35267	0.187598	0.222034	0.290599	0.43528	0.515352	0.589702	0.444163	0.383739
chr5:20382599	chr5	20382599	-	Intron	Phtf2	ENSMUSG00000039987	68770	NA	NA	0.0541667	0.113259	0.031746	0.0993412	0.0151515	0.0208333	0.0277778	0.0208333	0.0910816	NA	0.0833333	NA	0.0833333	NA	NA	0.0833333	NA	NA	0.111111	NA	3.80209	4.56196	4.73677	4.9278	4.21052	4.45109	4.52515	4.1243	2.20325	4.21924	4.0312	5.35267	0.187598	0.222034	0.290599	0.43528	0.515352	0.589702	0.444163	0.383739
chr5:20515450	chr5	20515450	-	Intron	Ptpn12	ENSMUSG00000028771	19248	0.266667	NA	0.0833333	0.122222	0.15	NA	0.222222	NA	0.111111	NA	0.288889	1	0.5	0.933333	0.595238	0.962963	0.638889	0.133333	0.266667	NA	0.3	0.5	1.95275	1.64705	1.74824	1.85721	1.90473	1.98688	3.43612	2.35244	2.56114	3.04675	1.87069	1.51328	0.784824	0.782811	0.729767	0.679808	0.495231	0.451324	0.804292	1.05465
chr5:3785487	chr5	3785487	-	Intron	Ankib1	ENSMUSG00000040351	70797	NA	NA	NA	0.0277778	NA	NA	0.047619	0.047619	NA	NA	NA	NA	NA	NA	0.0833333	0.333333	0.047619	NA	NA	NA	0.166667	NA	3.60302	4.6569	4.2379	3.95137	4.75098	3.95035	9.41523	8.26282	8.99816	11.4975	8.84486	9.56109	0.359131	0.390021	0.391001	0.478018	0.47522	0.499914	0.815514	0.790782
chr5:92378172	chr5	92378172	-	UTR	Rchy1	ENSMUSG00000029397	68098	0.0119048	0.0183331	0.0136196	0.015874	0.0115178	0.00898131	0.00715548	0.0120204	0.00937388	0.00811598	0.0168906	0.00529101	0.00952381	NA	0.0101591	NA	0.00421941	NA	0.00824093	0.00847458	0.00529101	0.01	3.85074	3.92426	3.84973	3.35842	3.99011	3.58117	13.8598	12.6535	12.655	15.2318	10.5513	8.77143	0.669837	0.79008	0.769447	0.867941	0.642461	0.550377	0.565997	0.72457
chr5:96512991	chr5	96512991	-	Intron	Cnot6l	ENSMUSG00000034724	231464	0.111111	NA	NA	0.0666667	0.222222	0.0833333	0.194444	NA	0.0555556	0.0833333	NA	NA	NA	NA	NA	0.333333	NA	NA	0.0833333	0.166667	0.166667	NA	4.03543	4.34833	4.56382	4.49721	4.53399	4.27998	1.20005	2.91849	3.24318	2.6924	3.00037	3.25544	0.497177	0.487446	0.484421	0.610682	0.703639	0.729364	0.436025	0.565349
chr5:96513085	chr5	96513085	-	Intron	Cnot6l	ENSMUSG00000034724	231464	0.166667	NA	NA	NA	0.333333	0.111111	0.0833333	NA	NA	NA	NA	NA	NA	NA	NA	0.166667	0.047619	NA	NA	NA	0.166667	NA	4.03543	4.34833	4.56382	4.49721	4.53399	4.27998	1.20005	2.91849	3.24318	2.6924	3.00037	3.25544	0.497177	0.487446	0.484421	0.610682	0.703639	0.729364	0.436025	0.565349
chr5:96513738	chr5	96513738	-	Intron	Cnot6l	ENSMUSG00000034724	231464	0.0277778	NA	0.047619	0.127525	NA	NA	NA	NA	0.030303	NA	0.0925926	NA	NA	NA	NA	NA	NA	NA	0.166667	NA	NA	NA	4.03543	4.34833	4.56382	4.49721	4.53399	4.27998	1.20005	2.91849	3.24318	2.6924	3.00037	3.25544	0.497177	0.487446	0.484421	0.610682	0.703639	0.729364	0.436025	0.565349
chr5:96513741	chr5	96513741	-	Intron	Cnot6l	ENSMUSG00000034724	231464	0.0606061	0.0952381	NA	0.152778	0.047619	0.0416667	0.133333	0.0611111	0.13468	NA	0.103704	0.472222	0.177778	NA	0.0833333	NA	0.122222	NA	0.388889	NA	0.0833333	NA	4.03543	4.34833	4.56382	4.49721	4.53399	4.27998	1.20005	2.91849	3.24318	2.6924	3.00037	3.25544	0.497177	0.487446	0.484421	0.610682	0.703639	0.729364	0.436025	0.565349
chr5:96513744	chr5	96513744	-	Intron	Cnot6l	ENSMUSG00000034724	231464	NA	NA	NA	0.0555556	0.0666667	0.0416667	0.133333	0.0333333	NA	NA	NA	NA	0.0666667	NA	0.0833333	NA	NA	NA	NA	NA	NA	NA	4.03543	4.34833	4.56382	4.49721	4.53399	4.27998	1.20005	2.91849	3.24318	2.6924	3.00037	3.25544	0.497177	0.487446	0.484421	0.610682	0.703639	0.729364	0.436025	0.565349
chr5:96528438	chr5	96528438	-	Intron	Cnot6l	ENSMUSG00000034724	231464	NA	0.037037	NA	NA	NA	0.0222222	NA	NA	0.138889	NA	0.0833333	0.0555556	NA	NA	NA	0.166667	NA	NA	NA	NA	NA	NA	4.03543	4.34833	4.56382	4.49721	4.53399	4.27998	1.20005	2.91849	3.24318	2.6924	3.00037	3.25544	0.497177	0.487446	0.484421	0.610682	0.703639	0.729364	0.436025	0.565349
chr6:120297296	chr6	120297296	-	Exon	Ccdc77	ENSMUSG00000030177	67200	NA	0.0416667	NA	NA	NA	0.166667	NA	NA	0.0666667	NA	0.0833333	NA	0.333333	NA	NA	NA	NA	NA	NA	0.166667	0.0666667	0.0833333	6.10639	7.17521	6.91046	6.9331	6.84704	6.52059	22.2782	22.0295	18.8878	21.8797	20.7672	23.0228	0.710448	0.567219	0.484973	0.526669	0.649086	0.700553	0.642922	0.437665
chr6:120303730	chr6	120303730	-	Exon	Ccdc77	ENSMUSG00000030177	67200	NA	NA	0.111111	NA	NA	0.166667	NA	0.111111	NA	0.047619	NA	0.333333	0.5	NA	NA	0.333333	NA	NA	NA	NA	0.277778	NA	6.10639	7.17521	6.91046	6.9331	6.84704	6.52059	22.2782	22.0295	18.8878	21.8797	20.7672	23.0228	0.710448	0.567219	0.484973	0.526669	0.649086	0.700553	0.642922	0.437665
chr6:30217345	chr6	30217345	-	Intron	Ube2h	ENSMUSG00000039159	22214	NA	0.222222	NA	NA	0.166667	0.111111	NA	1	NA	0.0833333	NA	0.333333	NA	0.166667	0.333333	0.333333	0.166667	NA	NA	NA	NA	NA	1.35163	1.25286	0.972154	1.25982	1.2062	1.15661	4.3003	3.1984	3.05867	4.32746	3.4528	3.97805	0.733141	0.561425	0.646219	0.625621	0.454841	0.471655	1.38225	0.9169
chr6:35058647	chr6	35058647	-	Intron	Cnot4	ENSMUSG00000038784	53621	0.0512821	NA	0.0447958	0.0297619	0.0196078	0.015873	0.0196078	0.0343915	NA	0.075641	0.0104167	0.5	NA	0.0333333	NA	NA	0.0555556	0.0666667	0.104345	0.0714286	NA	0.177778	4.22403	7.96144	7.77724	9.10432	7.59106	8.6324	4.849	5.31538	6.26792	5.19121	4.58706	5.36455	0.524094	0.557508	0.534962	0.646577	0.688525	0.772055	0.969585	0.658277
chr6:35062293	chr6	35062293	-	Intron	Cnot4	ENSMUSG00000038784	53621	0.296296	0.406615	0.46047	0.410384	0.488889	0.452222	0.598347	0.492063	0.377778	0.425132	0.501587	0.166667	0.555556	0.555556	0.833333	0.416667	NA	0.366667	0.5	0.5	0.583333	0.111111	4.22403	7.96144	7.77724	9.10432	7.59106	8.6324	4.849	5.31538	6.26792	5.19121	4.58706	5.36455	0.524094	0.557508	0.534962	0.646577	0.688525	0.772055	0.969585	0.658277
chr6:35062297	chr6	35062297	-	Intron	Cnot4	ENSMUSG00000038784	53621	0.166667	0.311111	0.382173	0.351716	0.405556	0.336182	0.511111	0.46685	0.274074	0.333061	0.447811	0.111111	0.5	0.388889	0.333333	0.416667	NA	0.366667	0.0833333	0.5	0.555556	0.111111	4.22403	7.96144	7.77724	9.10432	7.59106	8.6324	4.849	5.31538	6.26792	5.19121	4.58706	5.36455	0.524094	0.557508	0.534962	0.646577	0.688525	0.772055	0.969585	0.658277
chr6:35069136	chr6	35069136	-	Intron	Cnot4	ENSMUSG00000038784	53621	NA	0.0238095	NA	NA	NA	NA	0.0362745	0.037037	0.0144928	0.0144928	0.0133333	NA	NA	NA	NA	NA	0.0833333	NA	NA	NA	NA	NA	4.22403	7.96144	7.77724	9.10432	7.59106	8.6324	4.849	5.31538	6.26792	5.19121	4.58706	5.36455	0.524094	0.557508	0.534962	0.646577	0.688525	0.772055	0.969585	0.658277
chr6:71837868	chr6	71837868	-	Intron	Ptcd3	ENSMUSG00000063884	69956	NA	0.0466667	NA	NA	0.0144928	NA	NA	0.00980392	NA	NA	NA	0.0666667	0.0666667	NA	NA	NA	NA	NA	0.0185185	NA	0.0151515	NA	8.43592	9.84814	9.3263	10.7345	9.41272	9.33063	7.97548	10.0636	9.84363	10.4455	11.433	11.968	1.23561	1.59013	1.67674	1.78642	1.86835	2.06369	3.39334	3.82737
chr6:83776699	chr6	83776699	-	Intron	Paip2b	ENSMUSG00000045896	232164	0.037037	0.037037	NA	0.0858586	NA	NA	0.037037	NA	0.0238095	0.025641	NA	NA	NA	NA	0.111111	NA	NA	NA	0.111111	NA	NA	NA	2.97058	2.97832	2.66506	2.50764	2.75553	2.45381	11.4444	13.0608	12.0287	12.112	11.3883	12.5029	0.502671	0.574428	0.654939	0.66788	0.695345	0.596508	0.962603	0.870175
chr7:107499790	chr7	107499790	-	Intron	Ppme1	ENSMUSG00000030718	72590	0.111111	NA	0.111111	0.037037	0.0666667	NA	NA	NA	NA	NA	0.194444	NA	NA	NA	0.111111	NA	NA	NA	0.333333	NA	0.333333	NA	2.07367	1.7248	1.46683	1.6223	1.50359	1.44908	5.0061	4.03996	4.29266	3.79958	4.02293	4.4562	0.421614	0.327419	0.209053	0.207159	0.321242	0.336768	0.853596	0.666667
chr7:117051622	chr7	117051622	-	Exon	Dennd5a	ENSMUSG00000035901	19347	0.111111	0.111111	0.111111	0.150794	NA	0.4	0.133333	0.333333	0.0833333	NA	0.0555556	NA	0.333333	NA	NA	0.333333	0.833333	NA	NA	NA	NA	NA	1.22517	0.874652	0.767801	0.915357	0.814401	0.70045	2.05252	0.80683	0.916512	1.2992	0.532517	1.52302	0.43023	0.356757	0.367403	0.350745	0.361435	0.381644	0.605721	0.776143
chr7:129180521	chr7	129180521	-	intergenic	Ears2	ENSMUSG00000030871	67417	NA	NA	0.111111	NA	NA	NA	NA	NA	0.166667	NA	NA	0.0952381	0.166667	NA	0.333333	0.333333	NA	NA	NA	NA	0.333333	0.222222	11.1636	10.9175	10.2461	11.2519	9.86597	10.8279	7.29129	8.73303	8.23017	7.90543	6.60426	8.42	0.291465	0.220526	0.167605	0.155855	0.171124	0.207919	0.312202	0.332836
chr7:133275235	chr7	133275235	-	Intron	Xpo6	ENSMUSG00000000131	74204	NA	NA	NA	0.0277778	0.0277778	NA	NA	0.0416667	NA	NA	0.0196078	NA	NA	NA	NA	NA	NA	NA	0.0833333	0.1	0.0666667	0.0666667	4.39858	5.23192	5.61361	5.21899	5.09615	4.42726	7.85397	10.1281	11.4289	10.6787	8.57224	8.09044	0.535034	0.705302	0.916994	1.10465	1.08704	1.08836	0.66602	1.05672
chr7:133279971	chr7	133279971	-	Intron	Xpo6	ENSMUSG00000000131	74204	NA	NA	NA	NA	NA	NA	NA	NA	0.030303	NA	0.037037	NA	0.333333	0.047619	NA	NA	0.333333	NA	NA	NA	0.388889	NA	4.39858	5.23192	5.61361	5.21899	5.09615	4.42726	7.85397	10.1281	11.4289	10.6787	8.57224	8.09044	0.535034	0.705302	0.916994	1.10465	1.08704	1.08836	0.66602	1.05672
chr7:133283584	chr7	133283584	-	Intron	Xpo6	ENSMUSG00000000131	74204	NA	NA	NA	0.015873	NA	0.0151515	0.0128205	0.0229885	NA	NA	0.0175439	0.333333	NA	NA	0.103175	NA	0.0666667	NA	NA	0.0833333	NA	0.333333	4.39858	5.23192	5.61361	5.21899	5.09615	4.42726	7.85397	10.1281	11.4289	10.6787	8.57224	8.09044	0.535034	0.705302	0.916994	1.10465	1.08704	1.08836	0.66602	1.05672
chr7:149229226	chr7	149229226	-	Intron	Mob2	ENSMUSG00000025147	101513	NA	NA	NA	0.0416667	NA	0.025641	0.037037	NA	NA	NA	0.111111	NA	NA	0.0833333	NA	0.166667	0.333333	0.333333	0.166667	NA	0.111111	NA	1.16483	1.24121	1.15574	1.5502	1.00982	1.41378	4.56981	6.17396	3.17997	4.24697	4.88176	4.58352	0.361535	0.445247	0.541736	0.55866	0.637311	0.58042	0.515188	0.413318
chr7:29093587	chr7	29093587	-	Intron	Timm50	ENSMUSG00000003438	66525	NA	NA	0.0416667	NA	0.0555556	NA	NA	NA	NA	NA	NA	NA	NA	0.0333333	NA	0.0416667	0.0666667	NA	NA	NA	0.047619	0.0555556	3.75043	3.06351	3.05818	3.52609	3.34385	3.27826	6.17023	6.5978	7.12586	8.19039	6.35413	6.55618	0.605828	0.886079	0.831099	0.714285	0.880262	1.11624	1.23333	1.07388
chr7:87857252	chr7	87857252	-	UTR	Iqgap1	ENSMUSG00000030536	29875	NA	NA	NA	0.0138889	NA	NA	NA	NA	NA	NA	NA	NA	NA	0.00271003	NA	0.00602999	0.00205761	0.004329	0.00254453	NA	0.00866234	NA	1.44117	0.983906	1.21789	1.23293	1.45465	1.26329	8.32435	6.66197	7.54013	6.63313	4.70868	5.56748	0.829365	1.14138	1.07012	0.975217	0.657333	0.657162	0.93788	1.36882
chr8:106948248	chr8	106948248	-	Intron	Dync1li2	ENSMUSG00000035770	234663	NA	NA	NA	0.155844	NA	NA	NA	NA	0.047619	NA	0.0333333	0.166667	NA	NA	NA	NA	0.0833333	NA	NA	NA	0.166667	NA	1.52686	1.68581	1.60992	1.63279	1.40931	1.54787	7.93661	7.05885	7.14291	5.45694	5.53503	4.20198	1.22573	1.09642	1.01735	1.02254	0.959445	0.905817	2.45593	2.28568
chr8:106948249	chr8	106948249	-	Intron	Dync1li2	ENSMUSG00000035770	234663	0.0555556	NA	NA	0.121212	NA	NA	NA	NA	0.206349	NA	NA	0.277778	NA	0.047619	NA	NA	0.0833333	NA	NA	NA	NA	NA	1.52686	1.68581	1.60992	1.63279	1.40931	1.54787	7.93661	7.05885	7.14291	5.45694	5.53503	4.20198	1.22573	1.09642	1.01735	1.02254	0.959445	0.905817	2.45593	2.28568
chr8:113528733	chr8	113528733	-	UTR	Ddx19b	ENSMUSG00000033658	234733	NA	NA	NA	0.0555556	NA	NA	NA	NA	NA	NA	NA	0.0555556	0.0222222	NA	NA	NA	0.0555556	NA	0.0333333	NA	0.0238095	0.0981481	1.80136	0.845971	0.841596	0.82859	0.901207	1.02861	0.0802378	0.152813	0.0802378	0.0802378	0.0802378	0.0802378	0.303138	0.352117	0.297899	0.401094	0.253769	0.317164	0.292436	0.334001
chr8:113708796	chr8	113708796	-	Intron	Glg1	ENSMUSG00000003316	20340	NA	NA	0.047619	0.0222222	0.0416667	NA	NA	0.0719697	0.0333333	NA	NA	NA	NA	0.0666667	NA	NA	0.333333	NA	NA	NA	NA	0.166667	2.63662	2.29175	2.53641	2.3949	2.44351	2.50216	10.8915	10.0076	10.766	10.8491	9.75295	9.3525	0.448692	0.365642	0.378765	0.337102	0.349254	0.330725	0.653758	0.606409
chr8:114243455	chr8	114243455	-	Intron	Bcar1	ENSMUSG00000031955	12927	0.00314465	NA	0.00350877	NA	NA	NA	0.00421941	0.00756057	NA	NA	0.0030303	NA	NA	0.0123457	NA	NA	NA	NA	NA	NA	NA	NA	2.6349	2.91668	2.91543	2.9189	3.10421	3.01056	4.80877	3.91577	4.40385	4.25008	2.20111	3.45703	2.31915	2.93349	3.69833	3.84514	2.59428	2.32866	3.24428	3.70215
chr8:114243485	chr8	114243485	-	Intron	Bcar1	ENSMUSG00000031955	12927	0.0303644	0.0270655	0.0270062	0.0242424	0.0639994	0.0223906	NA	0.0361552	0.0327381	0.0455773	0.0491875	0.0350877	0.0769231	0.0404412	0.0575483	0.0499109	0.031746	NA	0.0738095	0.0357143	0.0333333	0.0333333	2.6349	2.91668	2.91543	2.9189	3.10421	3.01056	4.80877	3.91577	4.40385	4.25008	2.20111	3.45703	2.31915	2.93349	3.69833	3.84514	2.59428	2.32866	3.24428	3.70215
chr8:114243495	chr8	114243495	-	Intron	Bcar1	ENSMUSG00000031955	12927	0.0166667	0.0107527	NA	0.0070922	NA	0.0322581	NA	0.0104167	0.0222222	0.0208333	NA	NA	0.0277778	0.0222222	0.0119048	0.0714286	0.0222222	NA	0.0128205	NA	NA	NA	2.6349	2.91668	2.91543	2.9189	3.10421	3.01056	4.80877	3.91577	4.40385	4.25008	2.20111	3.45703	2.31915	2.93349	3.69833	3.84514	2.59428	2.32866	3.24428	3.70215
chr8:114243514	chr8	114243514	-	Intron	Bcar1	ENSMUSG00000031955	12927	NA	NA	0.00740741	NA	NA	NA	0.00952381	NA	NA	0.0166667	0.00980392	NA	NA	NA	0.0175439	NA	0.0196078	NA	NA	NA	NA	NA	2.6349	2.91668	2.91543	2.9189	3.10421	3.01056	4.80877	3.91577	4.40385	4.25008	2.20111	3.45703	2.31915	2.93349	3.69833	3.84514	2.59428	2.32866	3.24428	3.70215
chr8:114265471	chr8	114265471	-	Intron	Bcar1	ENSMUSG00000031955	12927	NA	NA	NA	NA	0.0719697	0.0333333	0.030303	NA	NA	NA	0.111111	NA	NA	NA	NA	0.0666667	NA	NA	0.166667	NA	0.0833333	NA	2.6349	2.91668	2.91543	2.9189	3.10421	3.01056	4.80877	3.91577	4.40385	4.25008	2.20111	3.45703	2.31915	2.93349	3.69833	3.84514	2.59428	2.32866	3.24428	3.70215
chr8:27117458	chr8	27117458	-	Intron	Fnta	ENSMUSG00000015994	14272	NA	0.0666667	NA	NA	0.0833333	NA	NA	0.166667	0.333333	0.0833333	NA	NA	NA	0.166667	NA	NA	0.333333	NA	0.111111	NA	0.111111	NA	2.49717	4.64715	5.60403	5.97585	5.02399	5.37944	5.06407	3.81569	2.72818	4.34967	3.67375	4.10333	0.398847	0.457664	0.472697	0.572533	0.678709	0.679089	0.966074	0.888509
chr8:35978275	chr8	35978275	-	Intron	Tnks	ENSMUSG00000031529	21951	NA	0.0144928	0.0144928	NA	NA	NA	0.0431235	NA	0.025641	0.0277778	0.0144928	NA	NA	NA	NA	NA	NA	0.111111	NA	0.125	NA	NA	1.34351	1.19199	0.962723	0.912156	0.977816	1.13671	3.38237	2.78329	2.83243	2.48619	1.95658	2.83033	0.624086	0.584671	0.541185	0.524514	0.503032	0.525371	0.743247	0.931596
chr8:49053967	chr8	49053967	-	Intron	Wwc2	ENSMUSG00000031563	52357	NA	NA	0.0144928	NA	0.015873	NA	NA	NA	0.047619	NA	0.0222222	0.111111	NA	NA	NA	NA	0.037037	0.0833333	NA	NA	0.111111	NA	2.86788	2.75556	2.80704	2.32118	2.86254	2.69745	10.5983	8.5739	6.80082	7.84824	6.40753	6.28195	0.82574	0.915582	0.986911	0.901586	0.793446	0.793337	1.37548	1.8955
chr8:55606803	chr8	55606803	-	UTR	Spcs3	ENSMUSG00000054408	76687	0.00512821	NA	NA	NA	NA	NA	NA	NA	NA	NA	NA	0.00189805	0.00198111	0.000566893	NA	0.000575705	NA	0.00141982	0.0013461	NA	NA	NA	4.1722	3.8803	3.91132	3.7252	3.91604	4.0091	9.46764	13.2536	10.7834	11.036	10.0521	10.5702	1.33836	1.34008	1.31356	1.34628	1.1081	1.51073	1.47439	1.64402
chr8:63452262	chr8	63452262	-	Intron	Clcn3	ENSMUSG00000004319	12725	0.133333	0.333333	0.15873	0.222222	0.273016	0.0666667	0.0666667	0.255556	0.337302	0.0952381	0.17037	NA	0.333333	NA	NA	NA	0.0666667	NA	0.333333	NA	0.333333	NA	3.93115	5.14602	5.46058	6.15026	5.48331	5.84537	2.73892	3.51735	4.91085	3.87622	5.48011	5.98795	0.311138	0.313817	0.238945	0.255589	0.379927	0.41844	1.28522	1.10121
chr8:63453052	chr8	63453052	-	Intron	Clcn3	ENSMUSG00000004319	12725	0.0555556	NA	NA	0.166667	0.0719697	NA	NA	NA	NA	0.037037	0.113636	NA	0.333333	NA	NA	NA	NA	NA	NA	NA	NA	NA	3.93115	5.14602	5.46058	6.15026	5.48331	5.84537	2.73892	3.51735	4.91085	3.87622	5.48011	5.98795	0.311138	0.313817	0.238945	0.255589	0.379927	0.41844	1.28522	1.10121
chr8:63453145	chr8	63453145	-	Intron	Clcn3	ENSMUSG00000004319	12725	0.0555556	0.206349	0.0666667	0.0555556	0.25	0.104167	0.388889	0.132576	0.209524	0.17197	0.225397	0.333333	NA	0.333333	0.166667	NA	0.295238	0.5	0.333333	NA	0.15	0.611111	3.93115	5.14602	5.46058	6.15026	5.48331	5.84537	2.73892	3.51735	4.91085	3.87622	5.48011	5.98795	0.311138	0.313817	0.238945	0.255589	0.379927	0.41844	1.28522	1.10121
chr8:72490579	chr8	72490579	-	Intron	Gatad2a	ENSMUSG00000036180	234366	NA	0.0175439	0.0119048	NA	0.0238095	NA	NA	NA	NA	NA	0.0151515	0.111111	NA	NA	NA	NA	NA	0.0555556	NA	NA	NA	NA	2.82403	2.18579	1.74716	1.9297	1.77617	1.60837	3.5443	3.71233	3.25205	2.52611	2.91112	3.09258	0.852802	1.03742	1.10949	1.07955	1.07813	1.01155	3.54746	3.72556
chr8:72919081	chr8	72919081	-	Exon	Crtc1	ENSMUSG00000003575	382056	NA	NA	NA	0.0666667	NA	NA	NA	0.0833333	0.0972222	0.133333	NA	0.111111	NA	NA	0.0833333	NA	NA	NA	NA	NA	NA	NA	4.54878	4.84575	5.47544	5.2911	4.82935	4.99062	3.45078	4.42129	4.07105	3.50194	3.29681	3.81016	0.395276	0.412517	0.468742	0.392713	0.571259	0.479343	1.13479	0.927835
chr8:72943495	chr8	72943495	-	Intron	Crtc1	ENSMUSG00000003575	382056	0.111111	NA	NA	NA	0.111111	NA	0.047619	NA	0.0666667	NA	0.111111	0.111111	NA	NA	NA	NA	NA	NA	NA	NA	0.166667	NA	4.54878	4.84575	5.47544	5.2911	4.82935	4.99062	3.45078	4.42129	4.07105	3.50194	3.29681	3.81016	0.395276	0.412517	0.468742	0.392713	0.571259	0.479343	1.13479	0.927835
chr8:72989682	chr8	72989682	-	Intron	Klhl26	ENSMUSG00000055707	234378	NA	NA	NA	NA	NA	NA	NA	NA	NA	0.0666667	NA	0.0952381	NA	0.0952381	NA	0.0666667	NA	NA	0.140741	NA	NA	0.047619	1.948	2.60212	2.31737	3.24559	2.72443	3.01524	6.00431	9.6569	8.66455	8.21952	7.33693	7.5924	1.1692	1.54875	1.46958	1.3043	1.3445	1.51246	1.9422	2.15544
chr8:72998519	chr8	72998519	-	Intron	Klhl26	ENSMUSG00000055707	234378	0.388889	0.030303	0.015873	0.00952381	0.0434343	0.0185185	0.0675439	0.216912	0.0561594	0.0529412	0.119145	0.111111	0.0833333	NA	0.047619	0.030303	0.166667	0.0166667	0.424242	NA	0.266667	0.266667	1.948	2.60212	2.31737	3.24559	2.72443	3.01524	6.00431	9.6569	8.66455	8.21952	7.33693	7.5924	1.1692	1.54875	1.46958	1.3043	1.3445	1.51246	1.9422	2.15544
chr8:98388867	chr8	98388867	-	UTR	Got2	ENSMUSG00000031672	14719	NA	NA	0.0070922	NA	0.00833333	NA	NA	NA	NA	NA	NA	NA	NA	0.00095511	NA	0.00205914	0.00324361	NA	NA	0.00147059	0.0018315	0.00158645	5.56221	5.40309	5.74475	6.8867	5.66777	6.62579	4.70802	5.535	6.30872	7.06012	6.42031	6.57754	0.527496	0.687703	0.752037	0.775641	0.794671	0.94402	0.994796	1.23633
chr9:101144599	chr9	101144599	-	Intron	Ppp2r3a	ENSMUSG00000043154	235542	0.0666667	0.0555556	0.111111	NA	0.166667	NA	NA	NA	NA	NA	0.0666667	NA	NA	NA	NA	NA	NA	NA	NA	NA	NA	0.166667	1.69927	2.11135	1.5832	1.73889	1.43311	1.55005	12.7049	8.01027	6.29949	8.55079	6.60802	7.83192	0.534974	0.470898	0.494093	0.497688	0.474107	0.492721	2.10589	1.9511
chr9:106142247	chr9	106142247	-	Exon	Alas1	ENSMUSG00000032786	11655	0.0833333	NA	0.0833333	NA	NA	NA	0.0555556	NA	0.037037	NA	0.047619	NA	NA	NA	NA	0.0833333	NA	NA	0.111111	NA	NA	NA	1.34261	0.953618	1.10908	0.729357	0.785053	0.839289	12.032	9.90125	8.95286	7.71279	11.3386	10.9876	0.475275	0.34742	0.284626	0.314657	0.501619	0.607473	0.860938	0.645736
chr9:21560294	chr9	21560294	-	UTR	Spc24	ENSMUSG00000074476	67629	NA	0.0555556	NA	NA	0.111111	0.177778	NA	NA	NA	0.231481	NA	0.0481311	0.0393162	0.0654738	0.0444682	0.0529888	0.130933	0.0421581	0.045977	0.025	0.0518116	0.0557491	1.7052	1.5717	1.43466	1.94568	1.48958	2.05646	3.79174	3.28037	3.1152	1.43254	2.15666	2.91266	1.07746	0.61504	0.562642	0.475323	0.629664	0.859699	3.86605	3.47816
chr9:4292822	chr9	4292822	-	intergenic	Aasdhppt	ENSMUSG00000025894	67618	0.047619	0.0196078	NA	NA	NA	NA	NA	NA	NA	NA	NA	NA	NA	NA	0.0416667	NA	NA	0.0606061	0.177778	NA	0.1	NA	5.30159	5.55454	5.42415	5.56656	5.235	4.91847	7.0892	9.21196	9.77011	8.52532	9.50481	8.42432	0.61643	0.74429	0.72118	1.10027	0.846806	0.960509	0.582889	0.464546
chr9:4293094	chr9	4293094	-	intergenic	Aasdhppt	ENSMUSG00000025894	67618	0.0555556	NA	NA	NA	NA	0.025641	NA	NA	0.0555556	NA	NA	NA	NA	NA	0.047619	NA	NA	NA	0.222222	0.125	NA	0.0833333	5.30159	5.55454	5.42415	5.56656	5.235	4.91847	7.0892	9.21196	9.77011	8.52532	9.50481	8.42432	0.61643	0.74429	0.72118	1.10027	0.846806	0.960509	0.582889	0.464546
chr9:4294268	chr9	4294268	-	intergenic	Aasdhppt	ENSMUSG00000025894	67618	NA	NA	NA	0.0133333	0.015873	NA	NA	NA	0.0138889	0.0070922	NA	0.0555556	0.31746	0.19	NA	0.0634921	0.047619	0.0185185	0.0416667	NA	0.240909	0.398148	5.30159	5.55454	5.42415	5.56656	5.235	4.91847	7.0892	9.21196	9.77011	8.52532	9.50481	8.42432	0.61643	0.74429	0.72118	1.10027	0.846806	0.960509	0.582889	0.464546
chr9:53468357	chr9	53468357	-	Intron	Cul5	ENSMUSG00000032030	75717	NA	NA	NA	0.0846561	0.047619	NA	0.0208333	0.0222222	NA	0.025641	NA	0.166667	NA	0.166667	NA	NA	NA	NA	NA	NA	NA	NA	0.0681116	0.0855807	0.0498359	0.124321	0.0984782	0.0498359	0.203511	0.203764	0.18778	0.207285	0.387634	0.4596	0.773306	0.83442	0.858813	0.869663	0.880028	1.00325	1.29976	1.32557
chr9:54246738	chr9	54246738	-	Intron	Dmxl2	ENSMUSG00000041268	235380	NA	NA	NA	0.166667	NA	NA	NA	NA	0.166667	NA	0.111111	0.333333	NA	0.333333	NA	NA	NA	NA	NA	NA	NA	0.166667	0.498513	0.546376	0.574891	0.509013	0.553601	0.676174	0.567699	0.756954	0.641982	0.695606	0.76671	1.25425	0.0454393	0.0543115	0.0377779	0.0542853	0.108166	0.106833	0.0391796	0.0609232
chr9:54247540	chr9	54247540	-	Intron	Dmxl2	ENSMUSG00000041268	235380	NA	NA	NA	0.333333	NA	0.111111	NA	NA	NA	NA	NA	NA	NA	0.166667	0.333333	NA	NA	0.111111	0.333333	0.166667	NA	NA	0.498513	0.546376	0.574891	0.509013	0.553601	0.676174	0.567699	0.756954	0.641982	0.695606	0.76671	1.25425	0.0454393	0.0543115	0.0377779	0.0542853	0.108166	0.106833	0.0391796	0.0609232
chr9:56188275	chr9	56188275	-	Intron	Peak1	ENSMUSG00000074305	244895	NA	0.0769231	0.0175439	0.0166667	NA	NA	0.030303	0.147619	NA	NA	0.0740741	0.037037	0.194444	NA	0.047619	0.222222	0.0416667	0.133333	0.166667	0.166667	0.333333	NA	5.36396	4.72518	4.86206	4.05337	4.55004	4.54595	5.83578	5.98631	5.61219	7.74007	4.91714	4.91155	0.47559	0.725693	0.69793	0.736183	0.340273	0.416981	1.06688	1.75839
chr9:56190475	chr9	56190475	-	Intron	Peak1	ENSMUSG00000074305	244895	0.0666667	NA	NA	NA	0.0277778	NA	0.111111	0.0555556	NA	NA	NA	NA	NA	NA	0.0833333	0.166667	0.5	0.222222	0.0833333	NA	NA	NA	5.36396	4.72518	4.86206	4.05337	4.55004	4.54595	5.83578	5.98631	5.61219	7.74007	4.91714	4.91155	0.47559	0.725693	0.69793	0.736183	0.340273	0.416981	1.06688	1.75839
chr9:96256021	chr9	96256021	-	Intron	Atp1b3	ENSMUSG00000032412	11933	NA	NA	NA	0.0123457	0.0208333	NA	NA	NA	NA	0.0175439	0.0138889	0.0333333	0.0416667	NA	0.0525253	0.047619	NA	NA	0.025641	NA	NA	NA	2.67323	1.98384	2.23433	2.1273	2.30618	1.92187	4.01268	4.92122	4.91062	4.79538	4.12866	4.00125	0.848695	1.22581	1.20175	1.25284	1.06667	1.09284	1.39344	1.83898
chr9:96456173	chr9	96456173	-	Intron	Rasa2	ENSMUSG00000032413	114713	NA	NA	0.0833333	0.111111	NA	0.166667	0.133333	0.0833333	NA	NA	NA	NA	NA	NA	NA	0.111111	NA	0.333333	NA	NA	0.333333	NA	2.00419	1.70592	1.84771	1.75861	1.64451	1.65721	4.87556	4.81295	4.36486	5.93661	4.41237	5.10855	0.386242	0.533434	0.500157	0.619015	0.299908	0.375077	0.826067	1.14015
chr9:96456486	chr9	96456486	-	Intron	Rasa2	ENSMUSG00000032413	114713	NA	NA	0.0694444	NA	NA	0.0952381	NA	0.0416667	0.0666667	NA	NA	0.2	0.111111	NA	0.0666667	0.166667	0.222222	NA	0.222222	NA	0.111111	NA	2.00419	1.70592	1.84771	1.75861	1.64451	1.65721	4.87556	4.81295	4.36486	5.93661	4.41237	5.10855	0.386242	0.533434	0.500157	0.619015	0.299908	0.375077	0.826067	1.14015
chrX:139315210	chrX	139315210	-	Intron	Ammecr1	ENSMUSG00000042225	56068	NA	0.0833333	NA	NA	0.111111	0.0925926	NA	0.0833333	NA	NA	0.0833333	NA	NA	0.333333	NA	NA	0.333333	0.166667	NA	NA	NA	0.111111	0.861051	0.968211	1.31277	1.34455	1.34161	1.54467	1.19136	0.801947	1.60877	1.17654	0.958169	1.63719	0.325572	0.334356	0.297951	0.344226	0.354621	0.362973	0.706368	0.67741
chrX:153991246	chrX	153991246	-	Intron	Mbtps2	ENSMUSG00000046873	270669	NA	NA	0.333333	0.166667	NA	0.233333	0.111111	NA	0.0833333	NA	NA	NA	0.333333	0.333333	0.333333	NA	NA	NA	NA	NA	0.333333	NA	5.75009	6.29612	6.48478	5.65204	5.53596	6.06249	5.74394	6.96458	7.52187	8.72104	6.07634	5.13703	0.3409	0.367379	0.35574	0.39364	0.421252	0.461173	0.351921	0.28156
chrX:153991417	chrX	153991417	-	Intron	Mbtps2	ENSMUSG00000046873	270669	0.111111	0.222222	NA	NA	0.222222	0.333333	NA	0.166667	NA	NA	NA	NA	NA	NA	NA	NA	NA	NA	NA	NA	0.111111	0.333333	5.75009	6.29612	6.48478	5.65204	5.53596	6.06249	5.74394	6.96458	7.52187	8.72104	6.07634	5.13703	0.3409	0.367379	0.35574	0.39364	0.421252	0.461173	0.351921	0.28156
chrX:153991418	chrX	153991418	-	Intron	Mbtps2	ENSMUSG00000046873	270669	0.111111	0.111111	NA	NA	0.222222	0.333333	0.166667	0.166667	NA	NA	NA	NA	NA	NA	NA	0.333333	NA	NA	NA	NA	0.111111	0.333333	5.75009	6.29612	6.48478	5.65204	5.53596	6.06249	5.74394	6.96458	7.52187	8.72104	6.07634	5.13703	0.3409	0.367379	0.35574	0.39364	0.421252	0.461173	0.351921	0.28156
chrX:160414858	chrX	160414858	-	UTR	Car5b	ENSMUSG00000031373	56078	NA	NA	NA	NA	NA	0.00497512	0.0151515	0.00980392	NA	0.00952381	0.0232423	0.0133333	NA	0.0229885	NA	0.0133333	0.0144928	0.0196078	NA	NA	NA	0.0166667	0.86591	0.456789	0.463228	0.22302	0.426776	0.116691	1.45438	0.202771	0.776769	0.292067	0.392866	0.15327	0.292958	0.225161	0.204691	0.17099	0.193152	0.202544	0.697717	0.365304
chrX:160414859	chrX	160414859	-	UTR	Car5b	ENSMUSG00000031373	56078	0.0286935	0.0402711	0.0627561	0.0197617	0.0186892	0.0365079	0.0615079	0.0720605	0.022821	0.0328733	0.0375645	0.0273133	NA	0.0622605	0.0555556	0.0266667	0.0144928	NA	0.0455748	0.067619	NA	0.0751634	0.86591	0.456789	0.463228	0.22302	0.426776	0.116691	1.45438	0.202771	0.776769	0.292067	0.392866	0.15327	0.292958	0.225161	0.204691	0.17099	0.193152	0.202544	0.697717	0.365304
chrX:160414862	chrX	160414862	-	UTR	Car5b	ENSMUSG00000031373	56078	0.0209091	0.0586478	0.0481481	0.0368106	0.100104	0.0508665	0.0625	0.0499651	0.038034	0.045566	0.133913	0.0278261	0.0289855	0.0138889	0.0373784	NA	NA	0.017094	0.0434783	NA	0.0238095	0.0151515	0.86591	0.456789	0.463228	0.22302	0.426776	0.116691	1.45438	0.202771	0.776769	0.292067	0.392866	0.15327	0.292958	0.225161	0.204691	0.17099	0.193152	0.202544	0.697717	0.365304
chrX:160414869	chrX	160414869	-	UTR	Car5b	ENSMUSG00000031373	56078	0.0246416	0.0788043	0.100422	0.0697917	0.122527	0.0727283	0.0863456	0.0865396	0.0708537	0.0784722	0.152279	0.0330113	0.031746	0.0333333	0.0566667	NA	NA	0.047397	0.05	NA	0.030303	0.0238095	0.86591	0.456789	0.463228	0.22302	0.426776	0.116691	1.45438	0.202771	0.776769	0.292067	0.392866	0.15327	0.292958	0.225161	0.204691	0.17099	0.193152	0.202544	0.697717	0.365304
chrX:160414879	chrX	160414879	-	UTR	Car5b	ENSMUSG00000031373	56078	0.0252454	0.103998	0.0845583	0.125213	0.176998	0.111616	0.110554	0.132258	0.0585217	0.0676934	0.193661	0.0561241	0.0740741	0.1	0.112374	0.0580808	0.0138889	0.018018	0.0442105	0.0935185	0.0822222	0.108547	0.86591	0.456789	0.463228	0.22302	0.426776	0.116691	1.45438	0.202771	0.776769	0.292067	0.392866	0.15327	0.292958	0.225161	0.204691	0.17099	0.193152	0.202544	0.697717	0.365304
chrX:160414884	chrX	160414884	-	UTR	Car5b	ENSMUSG00000031373	56078	0.0268384	0.082381	0.0825397	0.0814451	0.149351	0.0729188	0.0921858	0.10939	0.0380952	0.0569061	0.186779	0.0296443	0.042328	0.0913043	0.0431849	0.0175439	NA	NA	NA	0.0942308	0.0555556	0.115079	0.86591	0.456789	0.463228	0.22302	0.426776	0.116691	1.45438	0.202771	0.776769	0.292067	0.392866	0.15327	0.292958	0.225161	0.204691	0.17099	0.193152	0.202544	0.697717	0.365304
chrX:160414895	chrX	160414895	-	UTR	Car5b	ENSMUSG00000031373	56078	NA	NA	0.0833333	0.0555556	0.047619	0.0666667	0.0333333	0.037037	NA	0.114286	NA	0.0222222	NA	NA	NA	NA	0.0166667	0.0277778	NA	NA	NA	NA	0.86591	0.456789	0.463228	0.22302	0.426776	0.116691	1.45438	0.202771	0.776769	0.292067	0.392866	0.15327	0.292958	0.225161	0.204691	0.17099	0.193152	0.202544	0.697717	0.365304
chrX:160415931	chrX	160415931	-	UTR	Car5b	ENSMUSG00000031373	56078	NA	0.0666667	NA	NA	NA	NA	NA	NA	NA	NA	0.0833333	0.043078	0.017094	0.0190476	0.00900901	0.00833333	0.0205033	0.0107527	0.00694444	0.0185185	NA	0.00757576	0.86591	0.456789	0.463228	0.22302	0.426776	0.116691	1.45438	0.202771	0.776769	0.292067	0.392866	0.15327	0.292958	0.225161	0.204691	0.17099	0.193152	0.202544	0.697717	0.365304
chrX:160415964	chrX	160415964	-	UTR	Car5b	ENSMUSG00000031373	56078	0.111111	0.122222	0.25	0.122222	0.0888889	0.125	0.0555556	0.166667	0.130952	0.114286	0.208333	0.227744	0.172663	0.183966	0.189177	0.142728	0.208428	0.19893	0.265653	0.125	0.149174	0.184815	0.86591	0.456789	0.463228	0.22302	0.426776	0.116691	1.45438	0.202771	0.776769	0.292067	0.392866	0.15327	0.292958	0.225161	0.204691	0.17099	0.193152	0.202544	0.697717	0.365304
chrX:160415965	chrX	160415965	-	UTR	Car5b	ENSMUSG00000031373	56078	0.047619	0.0666667	0.166667	0.122222	0.0555556	0.111111	NA	0.0555556	0.0555556	0.047619	0.047619	0.048538	0.0570231	0.0556154	0.0165239	0.036036	0.0506891	0.0185185	0.0602084	0.02	0.0364706	0.0133333	0.86591	0.456789	0.463228	0.22302	0.426776	0.116691	1.45438	0.202771	0.776769	0.292067	0.392866	0.15327	0.292958	0.225161	0.204691	0.17099	0.193152	0.202544	0.697717	0.365304
chrX:160416686	chrX	160416686	-	UTR	Car5b	ENSMUSG00000031373	56078	0.00100402	0.00218579	NA	0.00148148	0.0047823	0.00123457	0.00289356	0.00104493	0.000893655	0.00226833	0.00070028	NA	NA	NA	NA	NA	NA	NA	NA	NA	NA	NA	0.86591	0.456789	0.463228	0.22302	0.426776	0.116691	1.45438	0.202771	0.776769	0.292067	0.392866	0.15327	0.292958	0.225161	0.204691	0.17099	0.193152	0.202544	0.697717	0.365304
chrX:160416688	chrX	160416688	-	UTR	Car5b	ENSMUSG00000031373	56078	NA	NA	0.00162458	NA	0.00193763	NA	NA	0.00102249	NA	0.00102881	NA	0.00314465	NA	NA	0.00250627	NA	NA	0.00179211	NA	NA	NA	NA	0.86591	0.456789	0.463228	0.22302	0.426776	0.116691	1.45438	0.202771	0.776769	0.292067	0.392866	0.15327	0.292958	0.225161	0.204691	0.17099	0.193152	0.202544	0.697717	0.365304
chrX:160416718	chrX	160416718	-	UTR	Car5b	ENSMUSG00000031373	56078	0.00569861	0.010843	0.0256297	0.0103364	0.0101252	0.011608	0.00951662	0.00659084	0.00528034	0.00944656	0.0107176	0.00887597	0.00383142	0.00730661	0.00536952	0.0072243	0.00968722	0.0135541	0.00942398	0.00463149	0.00700804	0.00677249	0.86591	0.456789	0.463228	0.22302	0.426776	0.116691	1.45438	0.202771	0.776769	0.292067	0.392866	0.15327	0.292958	0.225161	0.204691	0.17099	0.193152	0.202544	0.697717	0.365304
chrX:160416722	chrX	160416722	-	UTR	Car5b	ENSMUSG00000031373	56078	0.00119048	0.00416603	0.00134496	0.00414125	0.00368158	0.00293154	0.00414841	0.00187502	0.00340587	0.00484893	0.00702764	0.00566998	0.00121655	0.0057115	0.00382139	NA	0.00155039	0.00276924	0.00316968	0.00253807	0.00268266	NA	0.86591	0.456789	0.463228	0.22302	0.426776	0.116691	1.45438	0.202771	0.776769	0.292067	0.392866	0.15327	0.292958	0.225161	0.204691	0.17099	0.193152	0.202544	0.697717	0.365304
chrX:160416723	chrX	160416723	-	UTR	Car5b	ENSMUSG00000031373	56078	0.00725284	0.0152928	0.020032	0.0177172	0.015646	0.0177169	0.020541	0.013707	0.0158424	0.0135279	0.0169179	0.0130808	0.00655789	0.00864222	0.00921319	0.0137951	0.0100583	0.0196143	0.0191394	NA	0.0134317	0.00792181	0.86591	0.456789	0.463228	0.22302	0.426776	0.116691	1.45438	0.202771	0.776769	0.292067	0.392866	0.15327	0.292958	0.225161	0.204691	0.17099	0.193152	0.202544	0.697717	0.365304
chrX:160416726	chrX	160416726	-	UTR	Car5b	ENSMUSG00000031373	56078	0.0063557	0.00817285	0.0096617	0.00812638	0.010677	0.00718191	0.00788307	0.0108485	0.0095964	0.0119889	0.0141013	0.019889	0.00971442	0.0106722	0.0150389	0.00357143	0.0152398	0.0160096	0.0143411	0.0153386	0.0123871	0.008345	0.86591	0.456789	0.463228	0.22302	0.426776	0.116691	1.45438	0.202771	0.776769	0.292067	0.392866	0.15327	0.292958	0.225161	0.204691	0.17099	0.193152	0.202544	0.697717	0.365304
chrX:160416743	chrX	160416743	-	UTR	Car5b	ENSMUSG00000031373	56078	0.0202586	0.0326039	0.0226314	0.0271231	0.0353829	0.0302237	0.0206844	0.030858	0.0288039	0.0233271	0.0345293	0.0510054	0.0155014	0.0272216	0.0300687	0.0178571	0.0228028	0.0374014	0.0228959	0.0162698	0.0336865	0.0211663	0.86591	0.456789	0.463228	0.22302	0.426776	0.116691	1.45438	0.202771	0.776769	0.292067	0.392866	0.15327	0.292958	0.225161	0.204691	0.17099	0.193152	0.202544	0.697717	0.365304
chrX:160416746	chrX	160416746	-	UTR	Car5b	ENSMUSG00000031373	56078	0.0136045	0.0143288	0.020096	0.0243317	0.0130059	0.0110023	0.0108188	0.0211609	0.0119332	0.0174927	0.0173657	0.00537634	0.00793651	0.0119032	0.0156963	0.00851732	0.0227087	0.0256767	0.0160911	0.0120968	0.0160372	0.00528085	0.86591	0.456789	0.463228	0.22302	0.426776	0.116691	1.45438	0.202771	0.776769	0.292067	0.392866	0.15327	0.292958	0.225161	0.204691	0.17099	0.193152	0.202544	0.697717	0.365304
chrX:160416748	chrX	160416748	-	UTR	Car5b	ENSMUSG00000031373	56078	0.0137318	0.025153	0.0162896	0.0213371	0.0293458	0.0231112	0.0206668	0.0268396	0.0191357	0.0184949	0.0297587	0.052964	0.0108401	0.0201109	0.0227258	0.019293	0.0273713	0.0354602	0.0226163	0.0388494	0.0383549	0.0221034	0.86591	0.456789	0.463228	0.22302	0.426776	0.116691	1.45438	0.202771	0.776769	0.292067	0.392866	0.15327	0.292958	0.225161	0.204691	0.17099	0.193152	0.202544	0.697717	0.365304
chrX:160416759	chrX	160416759	-	UTR	Car5b	ENSMUSG00000031373	56078	NA	0.0034904	0.00232288	0.0011655	NA	0.00114943	NA	0.00113379	0.0026475	NA	0.00095511	NA	NA	NA	NA	0.00438596	NA	0.00228311	NA	0.00520833	NA	NA	0.86591	0.456789	0.463228	0.22302	0.426776	0.116691	1.45438	0.202771	0.776769	0.292067	0.392866	0.15327	0.292958	0.225161	0.204691	0.17099	0.193152	0.202544	0.697717	0.365304
chrX:46588138	chrX	46588138	-	Intron	Enox2	ENSMUSG00000031109	209224	NA	NA	NA	0.333333	NA	NA	NA	NA	0.333333	NA	NA	NA	NA	NA	0.333333	NA	NA	0.333333	NA	NA	0.333333	0.333333	0.951845	0.758863	0.682023	0.506339	0.582183	0.469824	3.83004	3.78495	4.36984	4.33155	3.56169	3.25193	0.0438585	0.0471558	0.0273788	0.0345809	0.0323887	0.046131	0.0617262	0.0391796
chrX:49016851	chrX	49016851	-	Intron	Hs6st2	ENSMUSG00000062184	50786	NA	0.030303	0.194444	NA	0.1	0.0277778	0.108225	0.025641	0.177778	0.0952381	0.030303	NA	NA	NA	0.047619	0.0555556	NA	NA	NA	NA	0.111111	0.333333	2.91737	4.06305	4.59692	5.12791	4.86328	4.84621	3.49991	4.7892	5.89959	6.28445	5.80645	6.16908	0.345024	0.313362	0.386685	0.441619	0.561885	0.493396	0.537027	0.611983
chrX:49017103	chrX	49017103	-	Intron	Hs6st2	ENSMUSG00000062184	50786	NA	0.333333	0.166667	NA	NA	NA	NA	0.333333	0.333333	NA	NA	NA	NA	0.333333	NA	NA	NA	NA	NA	NA	0.333333	NA	2.91737	4.06305	4.59692	5.12791	4.86328	4.84621	3.49991	4.7892	5.89959	6.28445	5.80645	6.16908	0.345024	0.313362	0.386685	0.441619	0.561885	0.493396	0.537027	0.611983
chrX:67597857	chrX	67597857	-	UTR	Ids	ENSMUSG00000035847	15931	0.122222	0.349206	0.166667	0.458333	0.333333	0.166667	0.416667	0.166667	0.166667	NA	0.0833333	0.0555556	NA	0.136752	0.166667	0.111111	0.12037	0.0833333	0.111111	NA	0.215686	NA	0.715954	0.60797	0.528387	0.312737	0.637774	0.48027	3.04234	1.90287	1.84659	1.93451	2.11403	2.30096	0.248769	0.153695	0.0841345	0.0518815	0.138233	0.124425	0.344463	0.227299
chrX:67597863	chrX	67597863	-	UTR	Ids	ENSMUSG00000035847	15931	0.228571	0.731481	0.366667	0.208333	0.166667	0.277778	0.75	0.5	0.166667	0.166667	0.216667	NA	0.0833333	0.107143	0.194444	NA	0.133333	0.0833333	0.222222	NA	0.222222	NA	0.715954	0.60797	0.528387	0.312737	0.637774	0.48027	3.04234	1.90287	1.84659	1.93451	2.11403	2.30096	0.248769	0.153695	0.0841345	0.0518815	0.138233	0.124425	0.344463	0.227299
chrX:71471989	chrX	71471989	-	Exon	Flna	ENSMUSG00000031328	192176	0.0245938	NA	0.0333333	0.0526316	0.0188828	0.0416667	0.0222222	0.0166667	0.107289	0.14652	0.132914	0.0280797	0.0437276	0.0764087	0.0736785	0.0230994	0.0560768	0.0507937	0.0747238	0.0645161	0.087619	0.10754	3.41186	2.94998	2.70923	3.3145	2.77082	3.09915	22.6186	22.5269	19.4654	22.0707	17.815	20.7618	4.44442	4.82378	5.27316	4.7509	3.18559	2.60754	4.09513	4.21053
chrX:71472201	chrX	71472201	-	Exon	Flna	ENSMUSG00000031328	192176	0.0166667	0.0119048	0.00980392	0.0470467	0.0320366	NA	0.0310245	NA	0.0809524	0.0222222	0.0588235	0.0131461	0.0166487	0.0142076	0.02745	0.0245791	0.0214052	0.0422277	0.0265737	0.02433	0.0336983	0.0269444	3.41186	2.94998	2.70923	3.3145	2.77082	3.09915	22.6186	22.5269	19.4654	22.0707	17.815	20.7618	4.44442	4.82378	5.27316	4.7509	3.18559	2.60754	4.09513	4.21053
[truncated: 59 more columns]

## Sheet: Legend
Supplemental Table S4: Editing levels of known mouse editing sites across all timepoints in nascent and total RNA intersected with a published MYC dataset (De Pretis et al. 2017)
Editing levels determined in the nascent and total RNA were intersected with data from a published dataset (De Pretis et al, 2017).
Column labels are as follows:
id	chromosome plus position (mm10)
chr	chromosome (mm10)
pos	position of editing site on chromosome (mm10)
str	strand (+/-)
ann	location of editing site (UTR, exon, intron)
gene_name	gene where editing site is located
ENS_id	ENSEMBL id of the gene
Entrez_ID	Entrez Gene ID
labeled	labeled nascent RNA (time point in h)
total	total RNA (time point in h)
_0	editing at:	0 minutes
_0.17	editing at:	10 minutes
_0.33	editing at:	20 minutes
_0.5	editing at:	30 minutes
_1	editing at:	1 hour
_1.5	editing at:	1.5 hours
_2	editing at:	2 hours
_4	editing at:	4 hours
_8	editing at:	8 hours
_12	editing at:	12 hours
_16	editing at:	16 hours
Data and description from De Pretis et al. 2017:
MYC_TSSshare	Quantification of the MYC signal at promoter regions relative to the total abundance of MYC bound to the genome
RNAPII_TSS	Quantification of the RNAPII signal at promoter regions
RNAPII_GB	Quantification of the RNAPII signal at gene-body regions
RNAPII_TES	Quantification of the RNAPII signal at termination-end-site regions
mature	Quantification of mature mRNA abundance (RPKM)
preMRNA	Quantification of pre-mRNA abundance(RPKM)
synthesis	Quantification of synthesis rate (RPKM/h)
degradation	Quantification of degradation rate (1/h)
processing	Quantification of processing rate (1/h)
